# Supplementary material
Source: PubMed Central journal article supplement (PMC8761390)

## Suppl. Fig. 5A

### Cluster 0

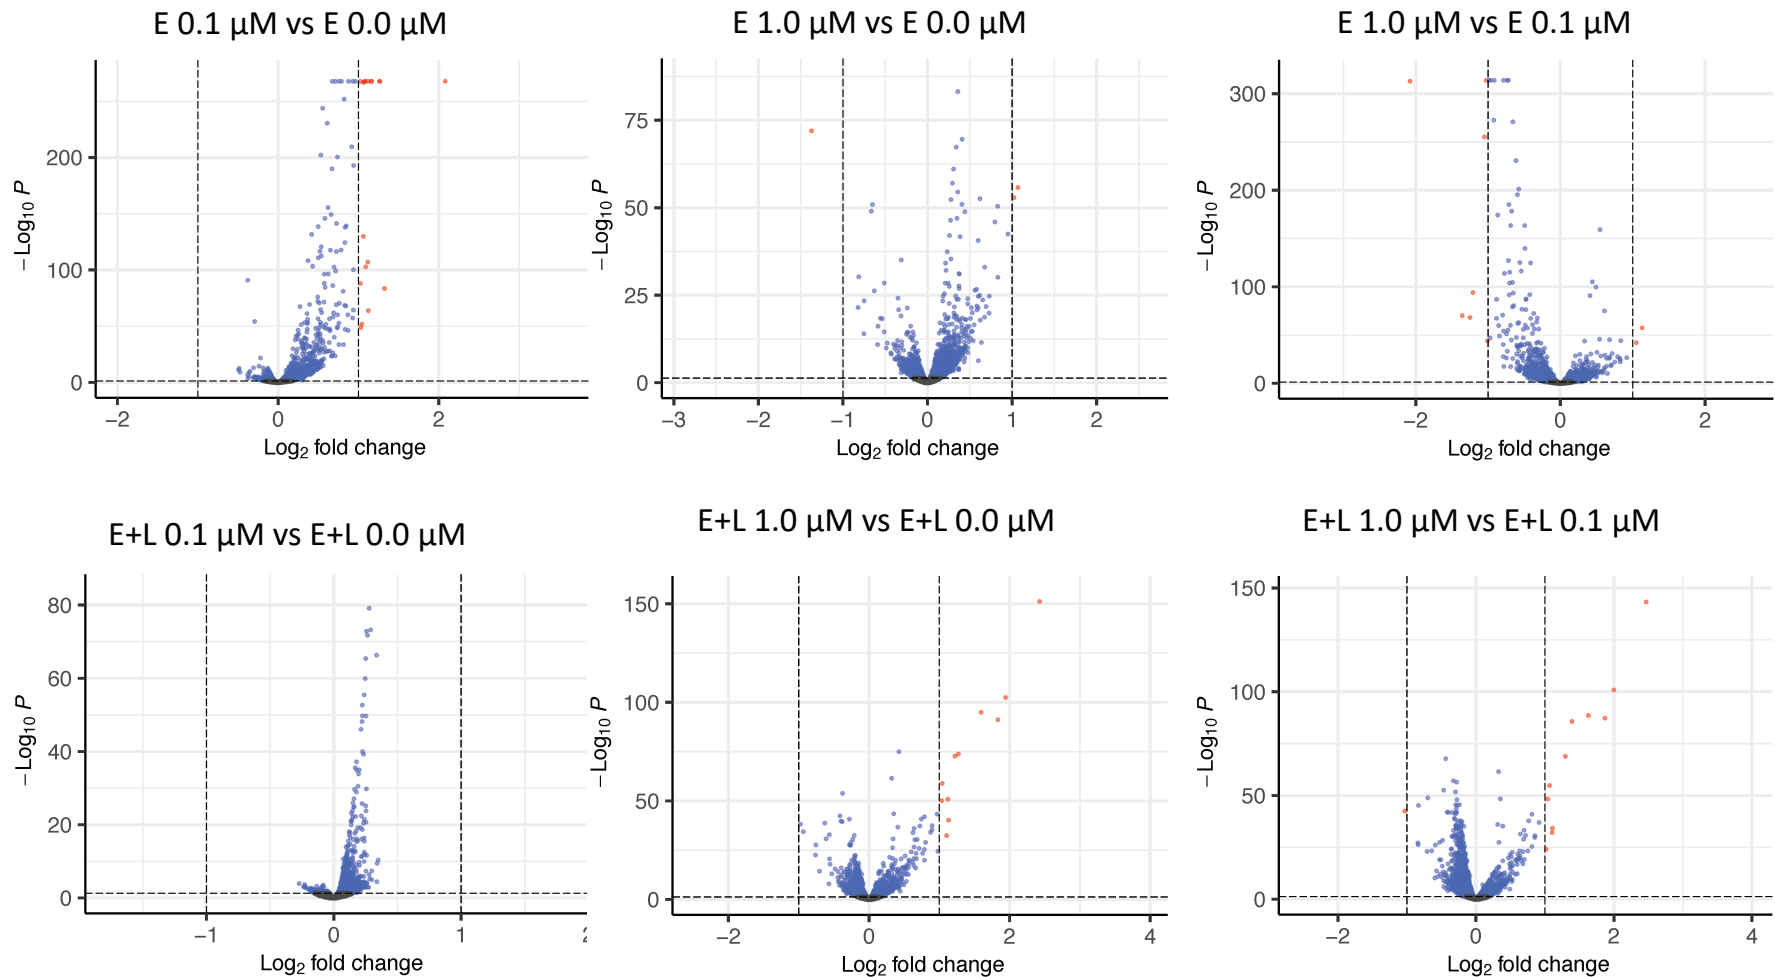

**Suppl. Fig. 5A-F.** Volcano plots highlight the changes in the expression of 33538 genes resulting from each exposure paradigm observed in each cell type (clusters). Genes whose expression was not significantly changed (grey circles), significantly changed ( $\text{FDR} < 0.05$ ) (blue circles) or changed  $> 2$ -fold ( $\text{FDR} 0.05$ ) (red circles) are shown. These are the same data shown in suppl. Fig. 3A-F but arranged so a comparison between the effects of different MeHg exposure paradigms within each cluster are easily compared.

**Suppl. Fig. 5B**

**Cluster 1**

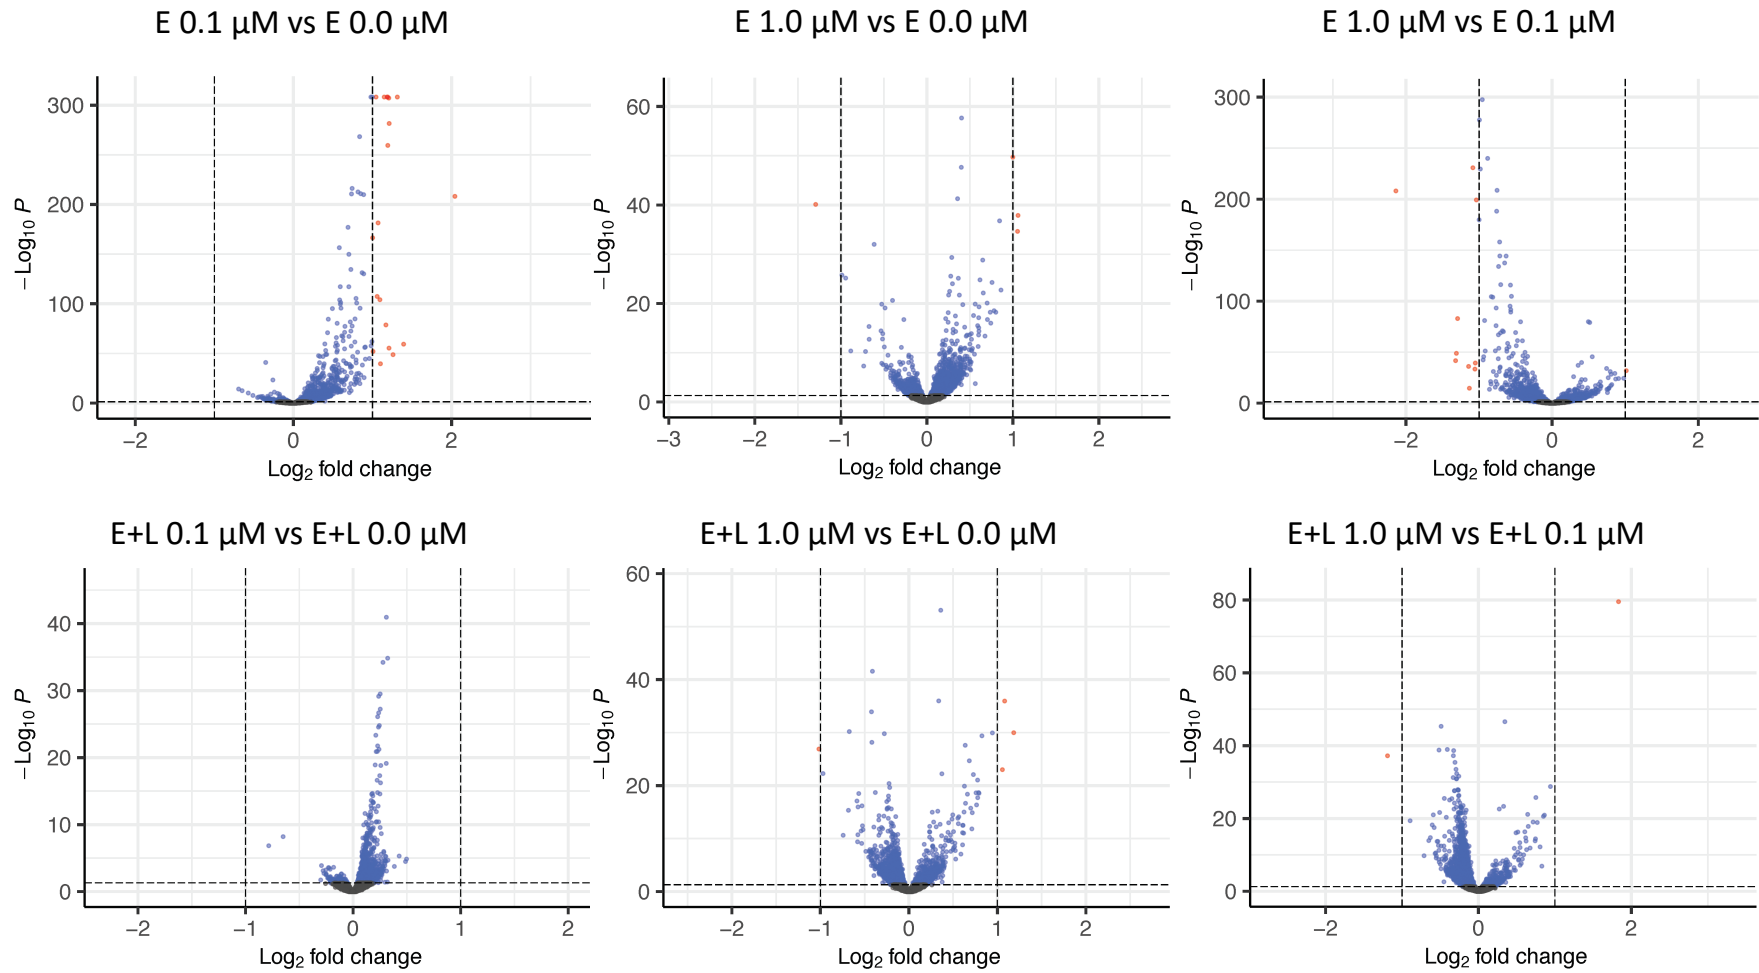

Suppl. Fig. 5C

Cluster 5

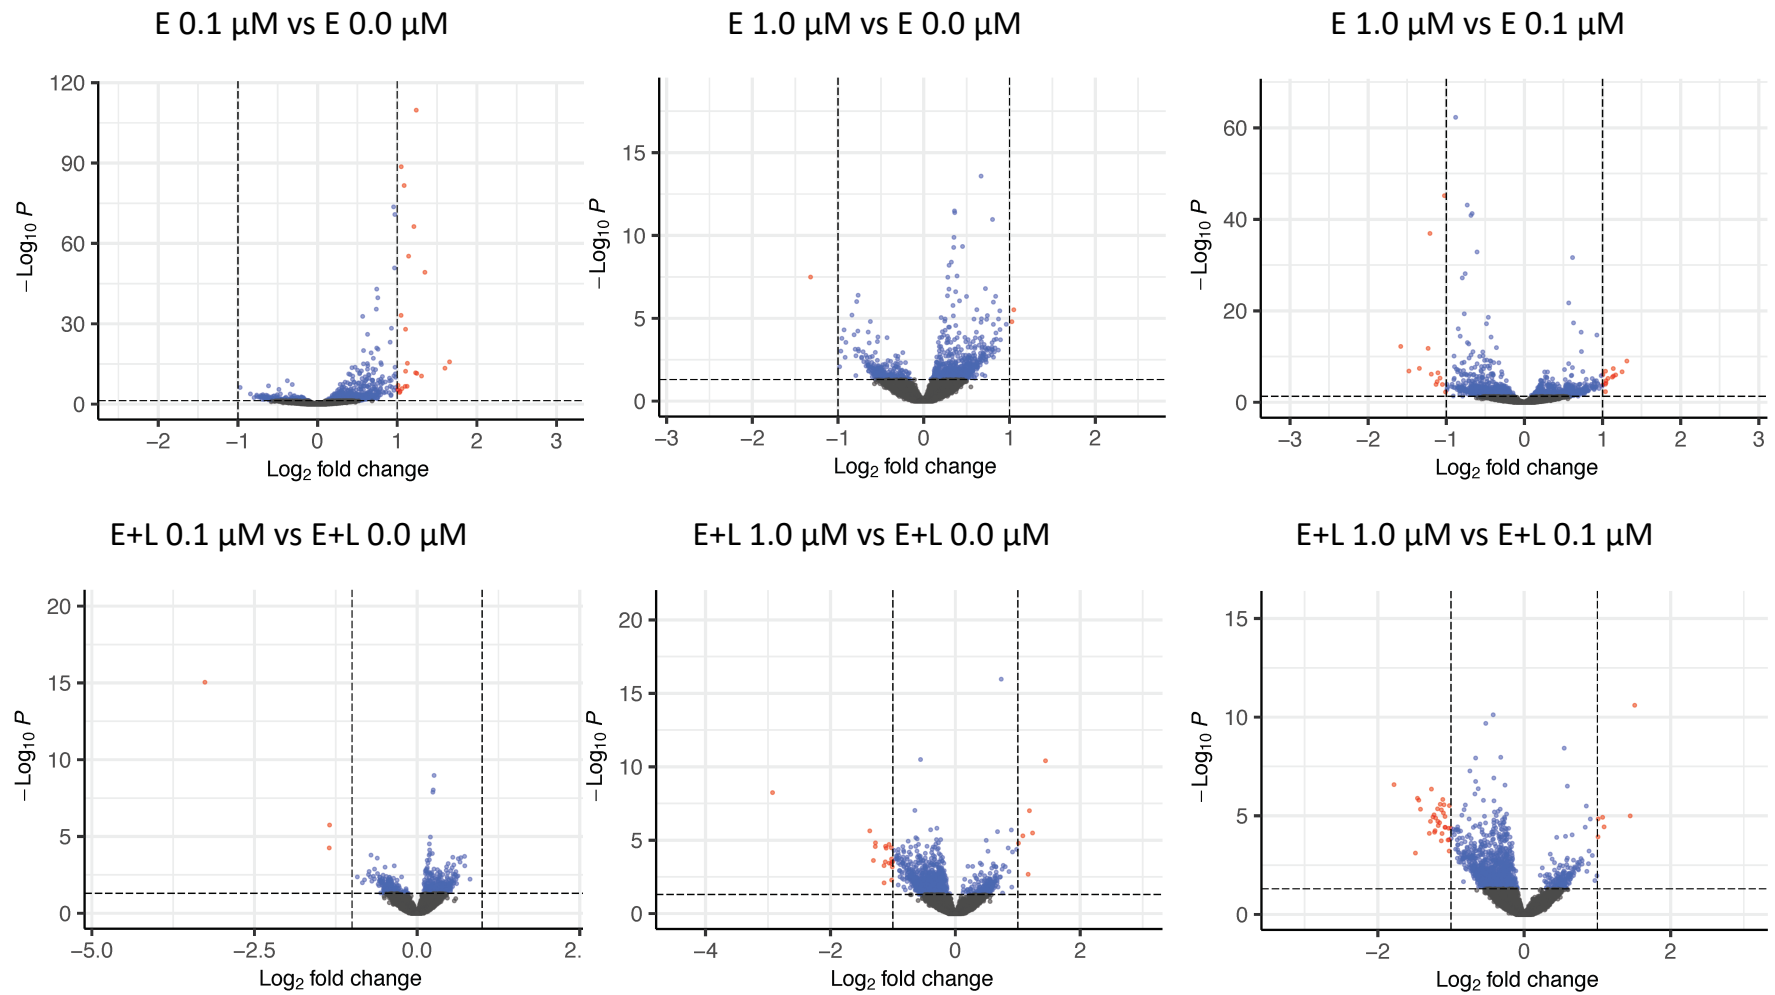

## Suppl. Fig. 5D

## Cluster 2

E 0.1  $\mu\text{M}$  vs E 0.0  $\mu\text{M}$

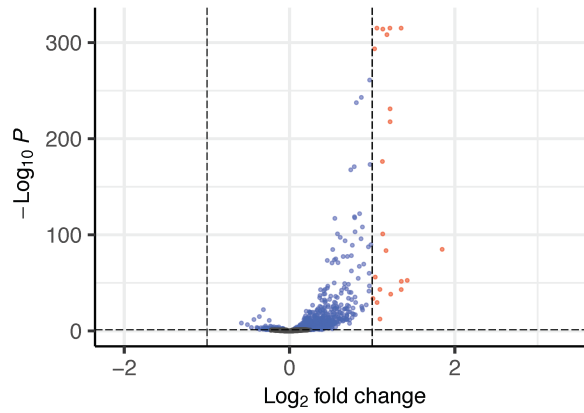

E 1.0  $\mu\text{M}$  vs E 0.0  $\mu\text{M}$

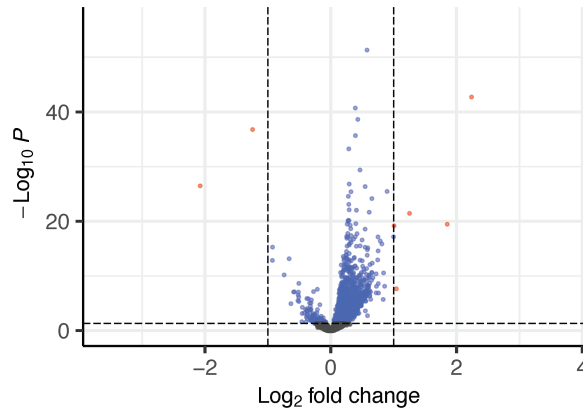

E 1.0  $\mu\text{M}$  vs E 0.1  $\mu\text{M}$

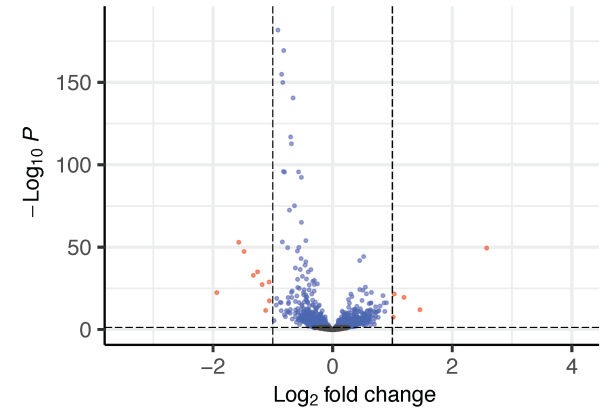

E+L 0.1  $\mu\text{M}$  vs E+L 0.0  $\mu\text{M}$

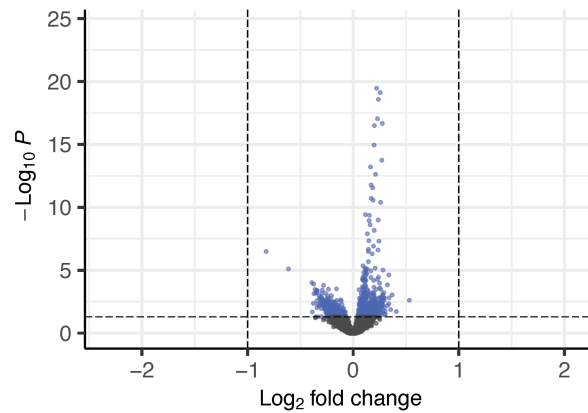

E+L 1.0  $\mu\text{M}$  vs E+L 0.0  $\mu\text{M}$

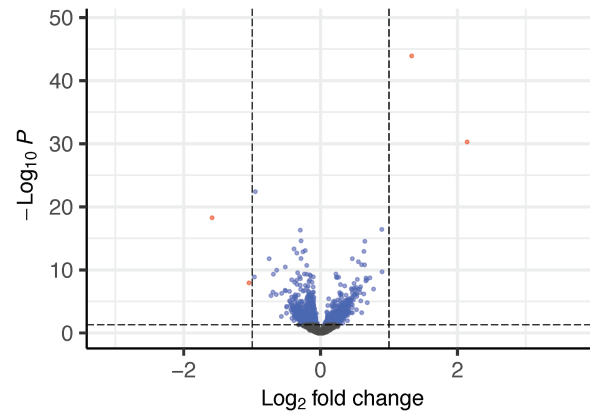

E+L 1.0  $\mu\text{M}$  vs E+L 0.1  $\mu\text{M}$

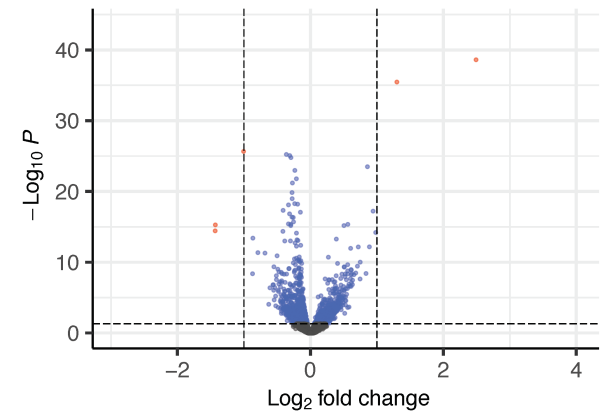

**Suppl. Fig. 5E**

**Cluster 3**

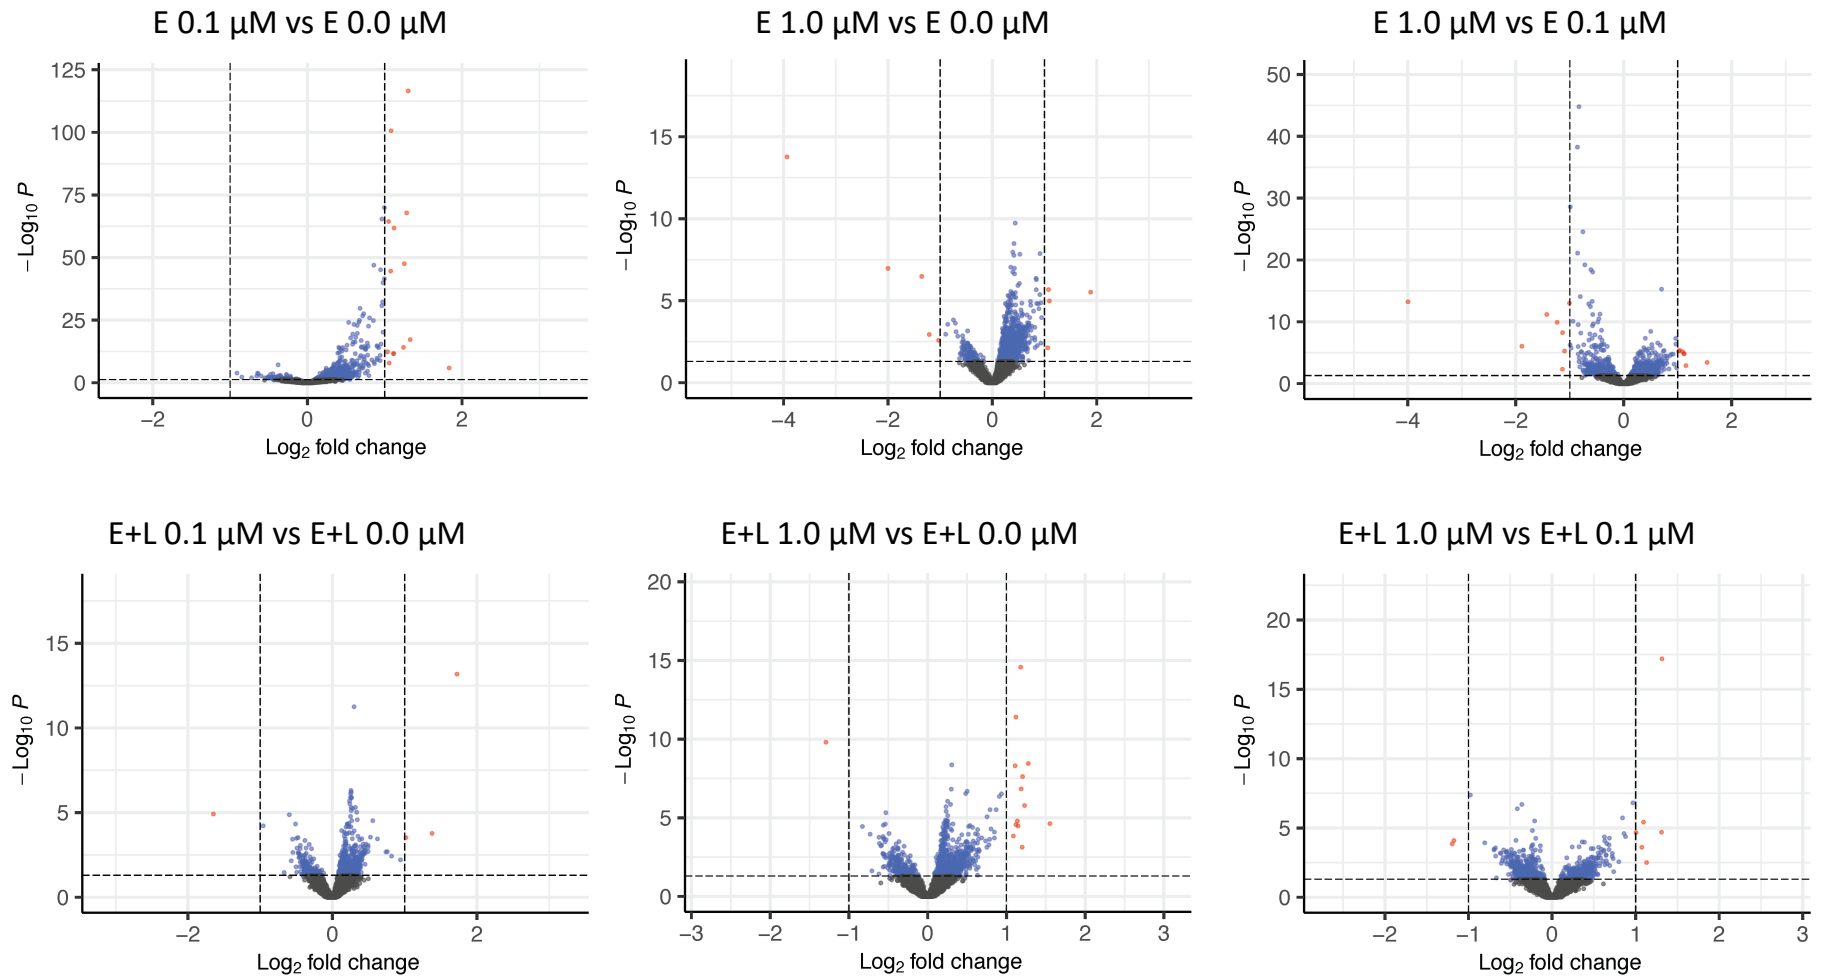

### Suppl. Fig. 5F

### Cluster 4

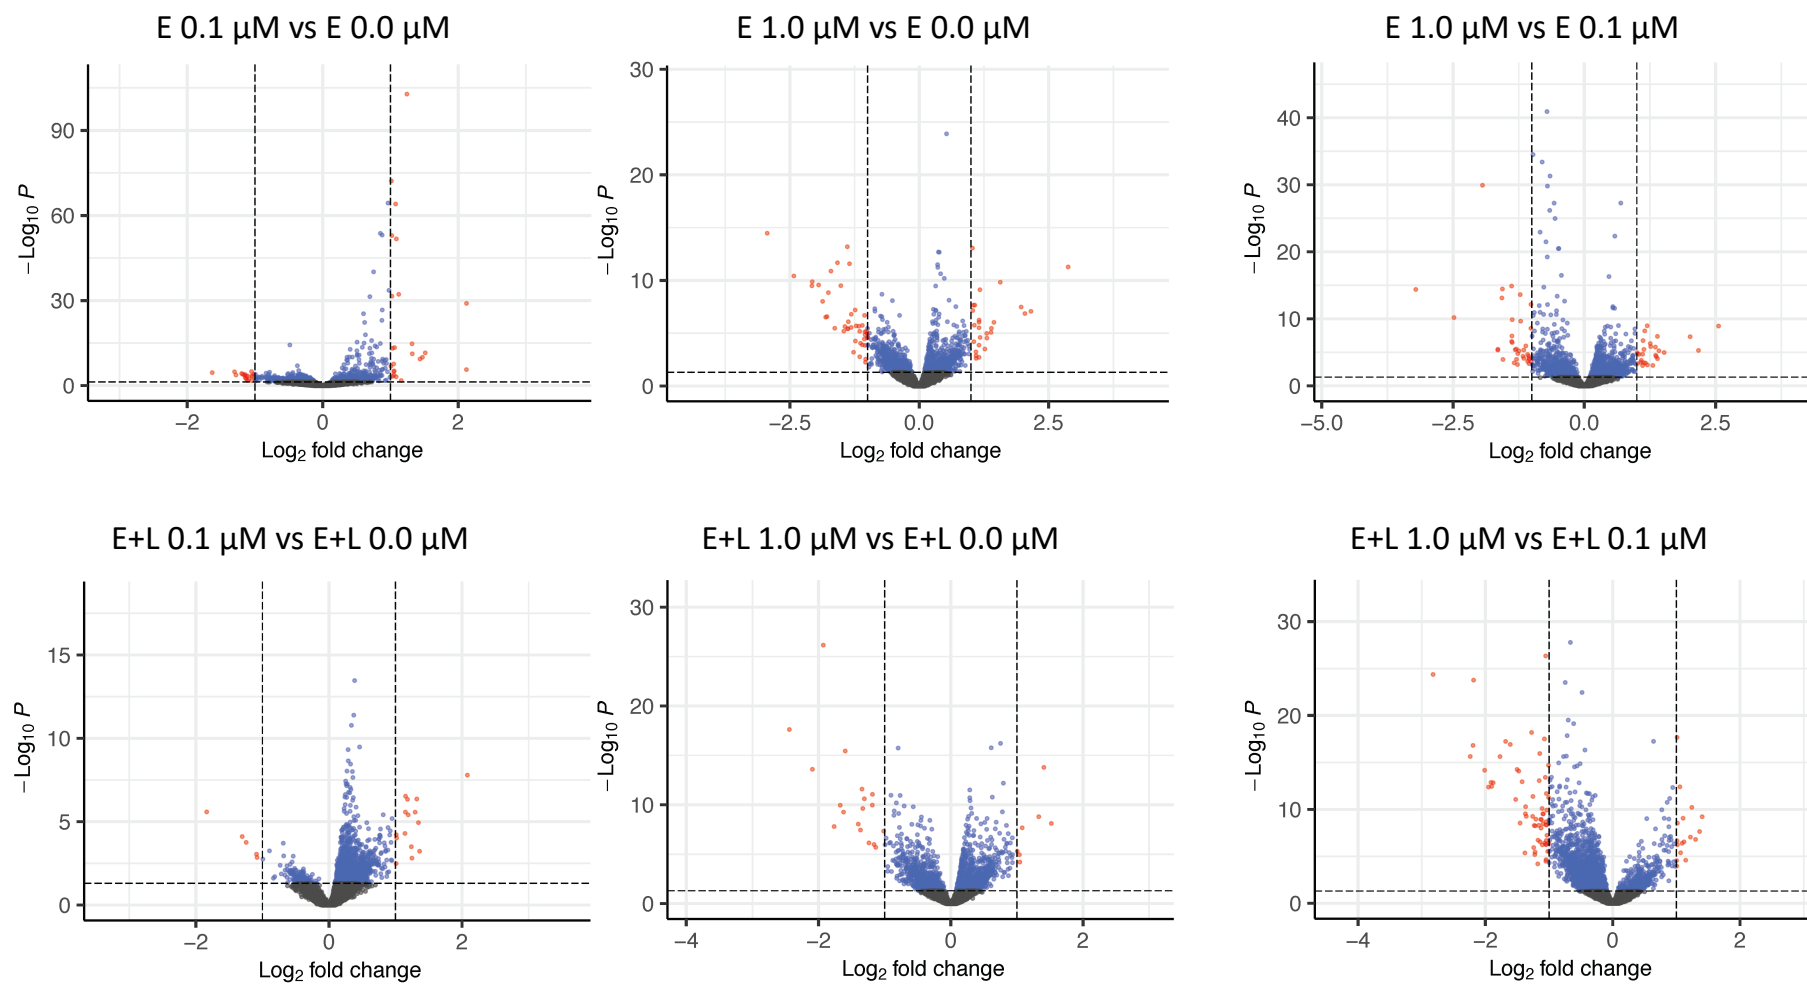

Supplement: NIHMS1710729-supplement-5.pdf [file NIHMS1710729-supplement-5.pdf]
