# Supplementary material
Source: PubMed Central journal article supplement (PMC8761390)
Supplement: NIHMS1710729-supplement-1.pdf [file NIHMS1710729-supplement-1.pdf]

## Suppl. Fig. 1

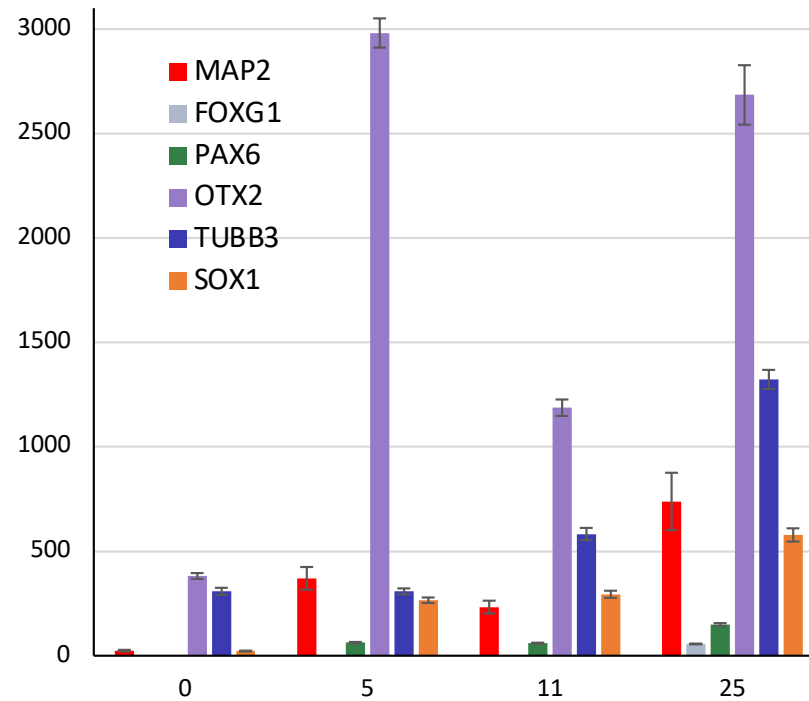

**Suppl. Fig. 1. Differentiation of hiPSC CD12 into cortical glutamatergic neurons.** The temporal expression of the genes *PAX6*, *FOXG1*, *OTX2* and *SOX1* (encode neural precursor cell markers) and *TUBB3* and *MAP2* (encode neuronal markers) were quantified by RT qPCR (D). (means  $\pm$  STDEV, n = 6, technical replicates)
