# Supplementary material
Source: PubMed Central journal article supplement (PMC8761390)
Supplement: NIHMS1710729-supplement-2.pdf [file NIHMS1710729-supplement-2.pdf]

## Suppl. Fig. 2

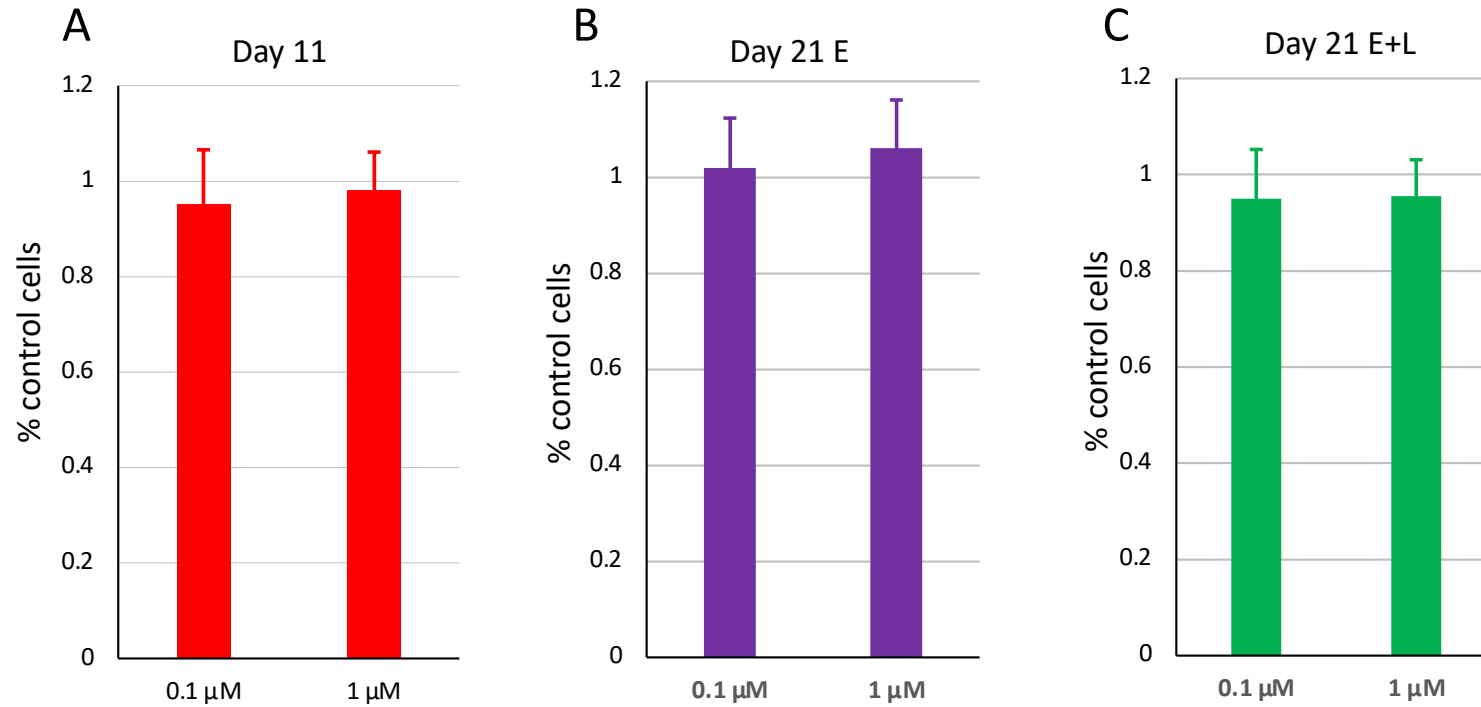

### Suppl. Fig. 2. MeHg is not cytotoxic to differentiating cortical glutamatergic neuronal cultures.

Differentiating cortical glutamatergic neurons were exposed to MeHg continuously during days 4-10 (E) only or during days 4-10 and days 14-20 (E+L) and the cell numbers were quantified on day 11 (A) or day 21 (B,C) using an automated cell counter. No significant cell loss was observed due to MeHg exposure under any of the different exposure paradigms. (N=8-11; 95% confidence intervals)
