# Supplementary material
Source: PubMed Central journal article supplement (PMC8761390)

**Suppl. Fig. 4A**

E 0.1  $\mu\text{M}$  versus E 0.0  $\mu\text{M}$

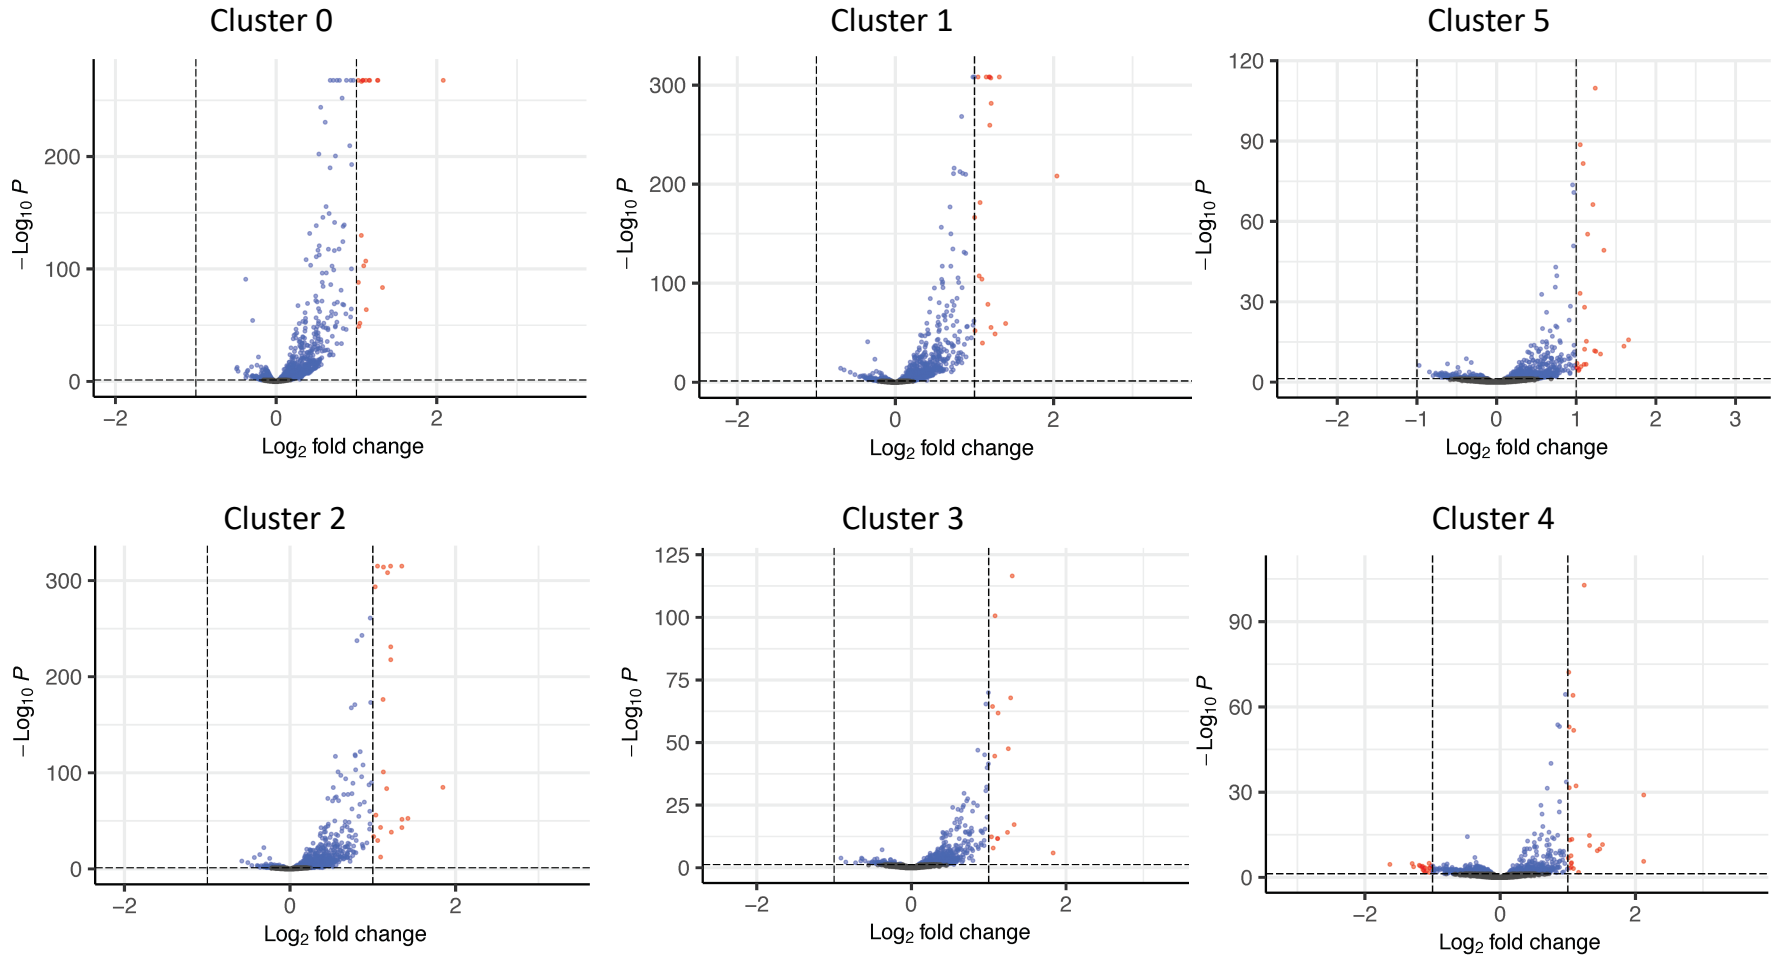

**Suppl. Fig. 4A-F.** Volcano plots highlight the changes in the expression of 33538 genes observed in different clusters as a result of MeHg exposure. Genes whose expression was not significantly changed (grey circles), significantly changed (FDR < 0.05) (blue circles) or changed > 2-fold (FDR 0.05) (red circles) are shown. These are the same data shown in suppl. Fig. 4A-F but here arranged for a convenient comparison between the responses of the different cell types (clusters) for each MeHg exposure paradigm.

### Suppl. Fig. 4B

E 1.0  $\mu$ M versus E 0.0  $\mu$ M

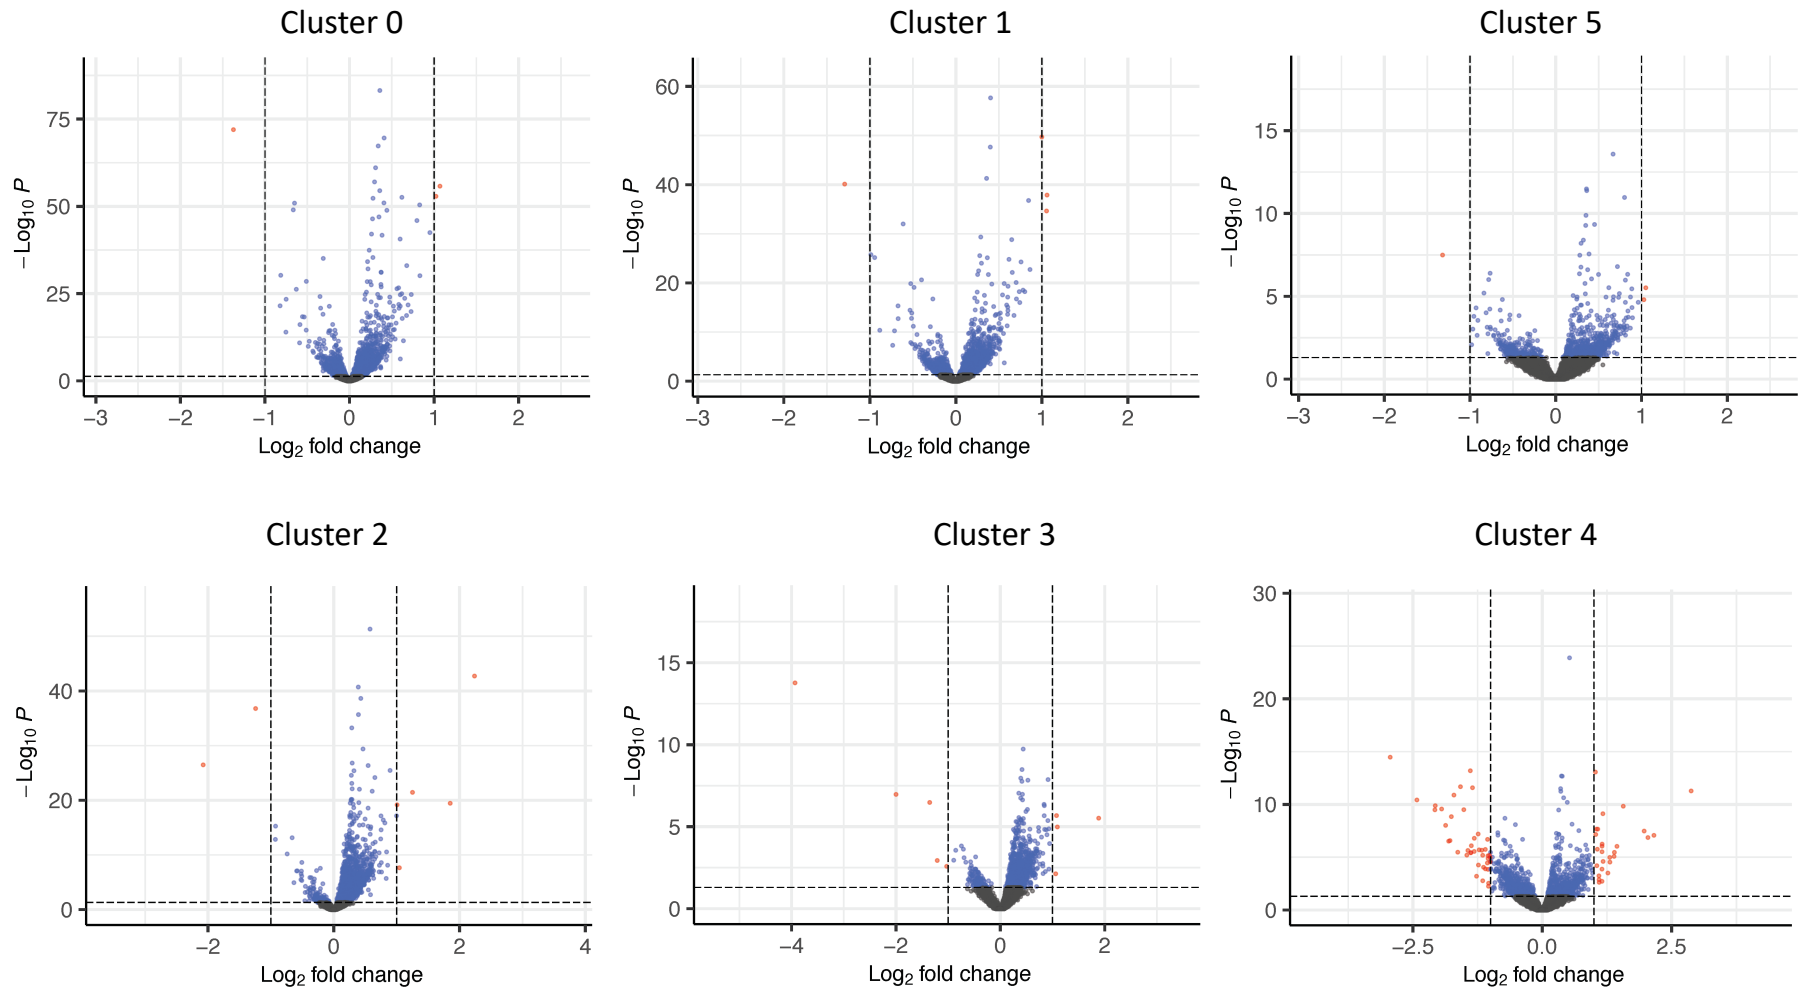

### Suppl. Fig. 4C

E 1.0  $\mu\text{M}$  versus E 0.1  $\mu\text{M}$

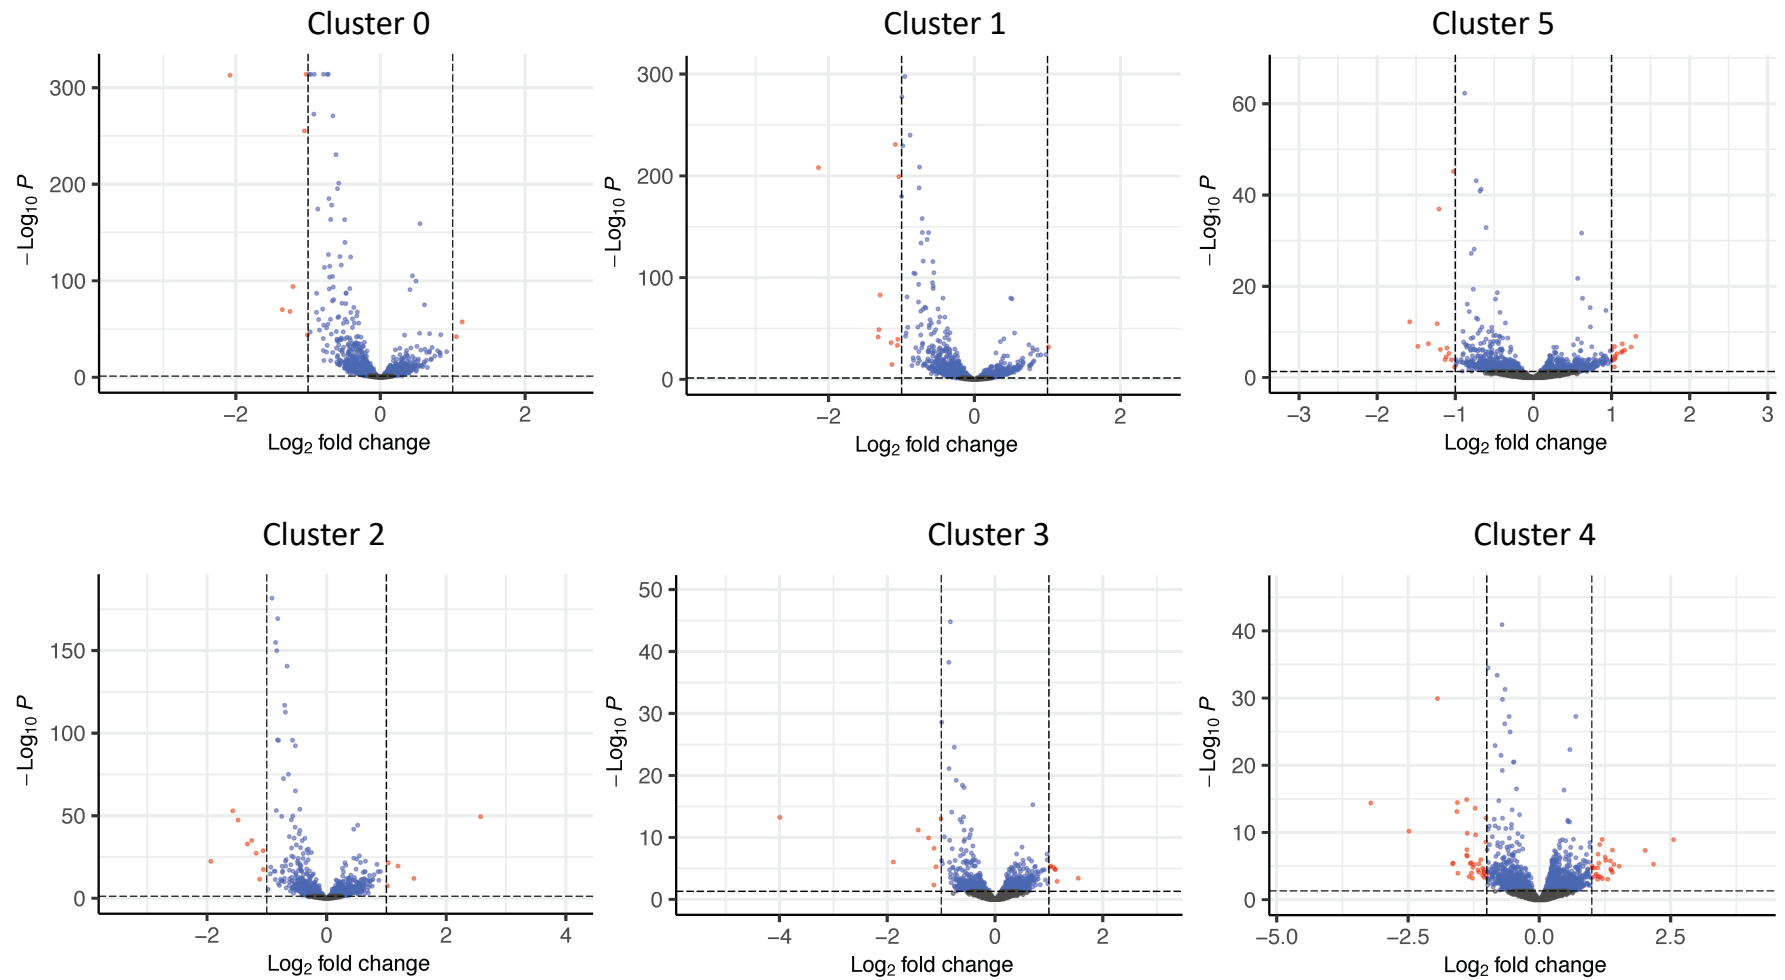

### Suppl. Fig. 4D

E+L 0.1  $\mu$ M versus E+L 0.0  $\mu$ M

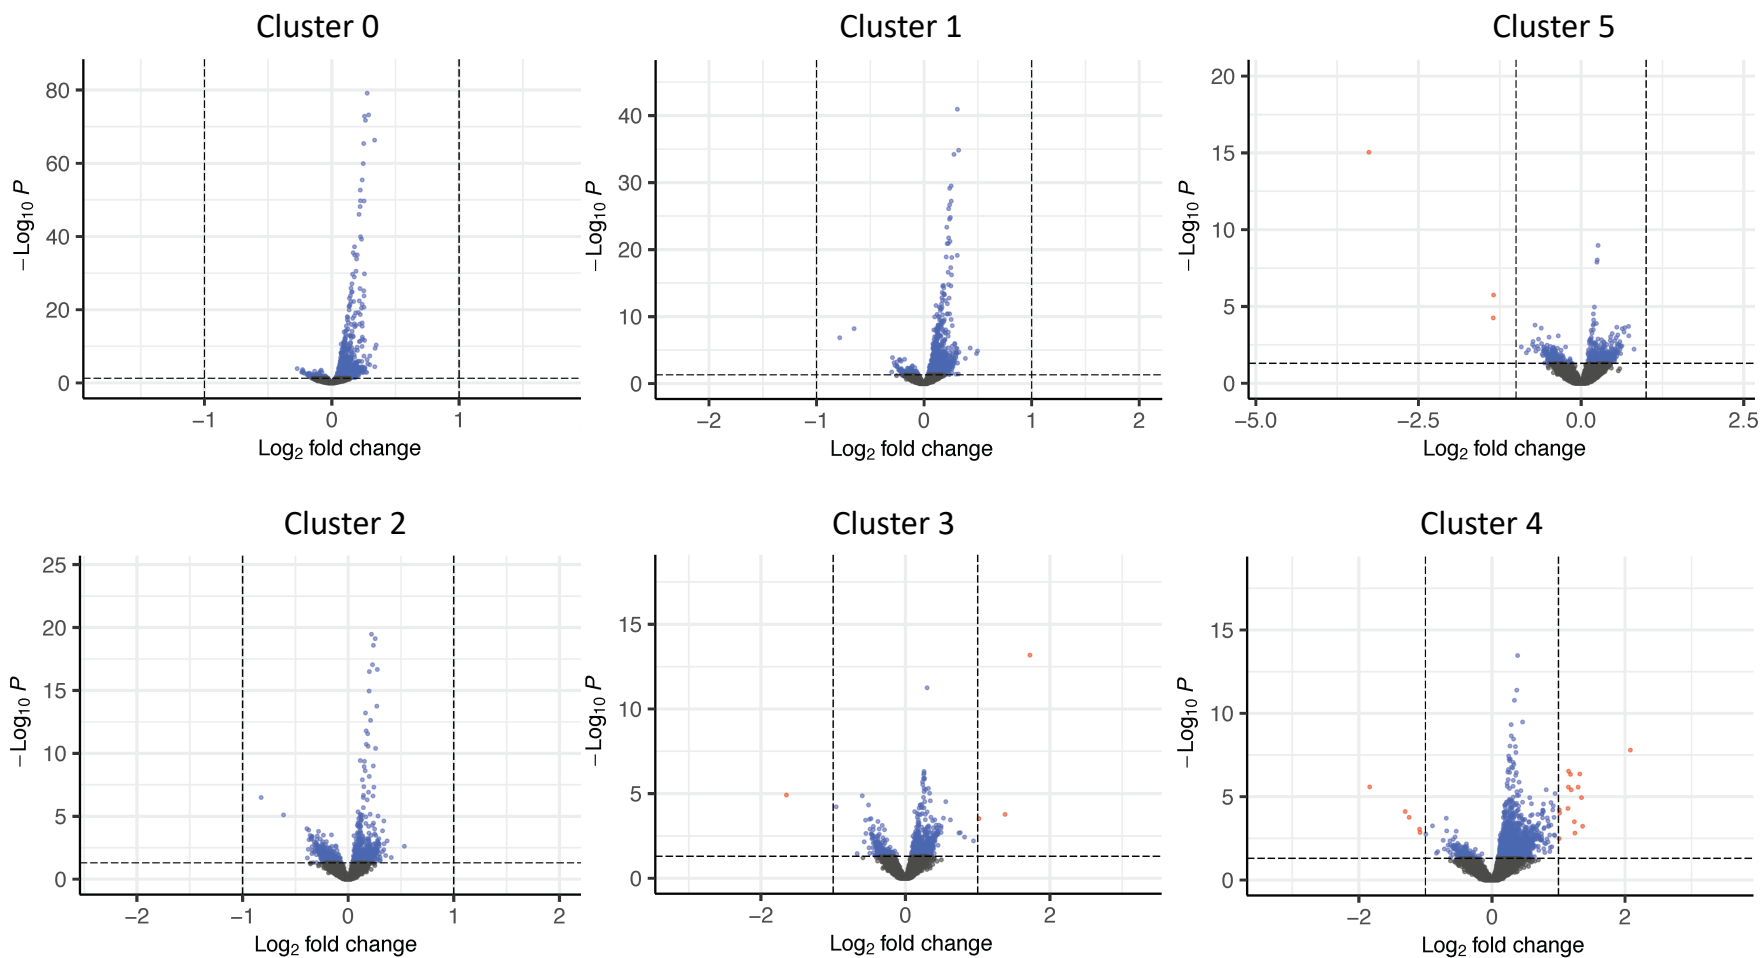

**Suppl. Fig. 4E**

E+L 1.0  $\mu$ M versus E+L 0.0  $\mu$ M

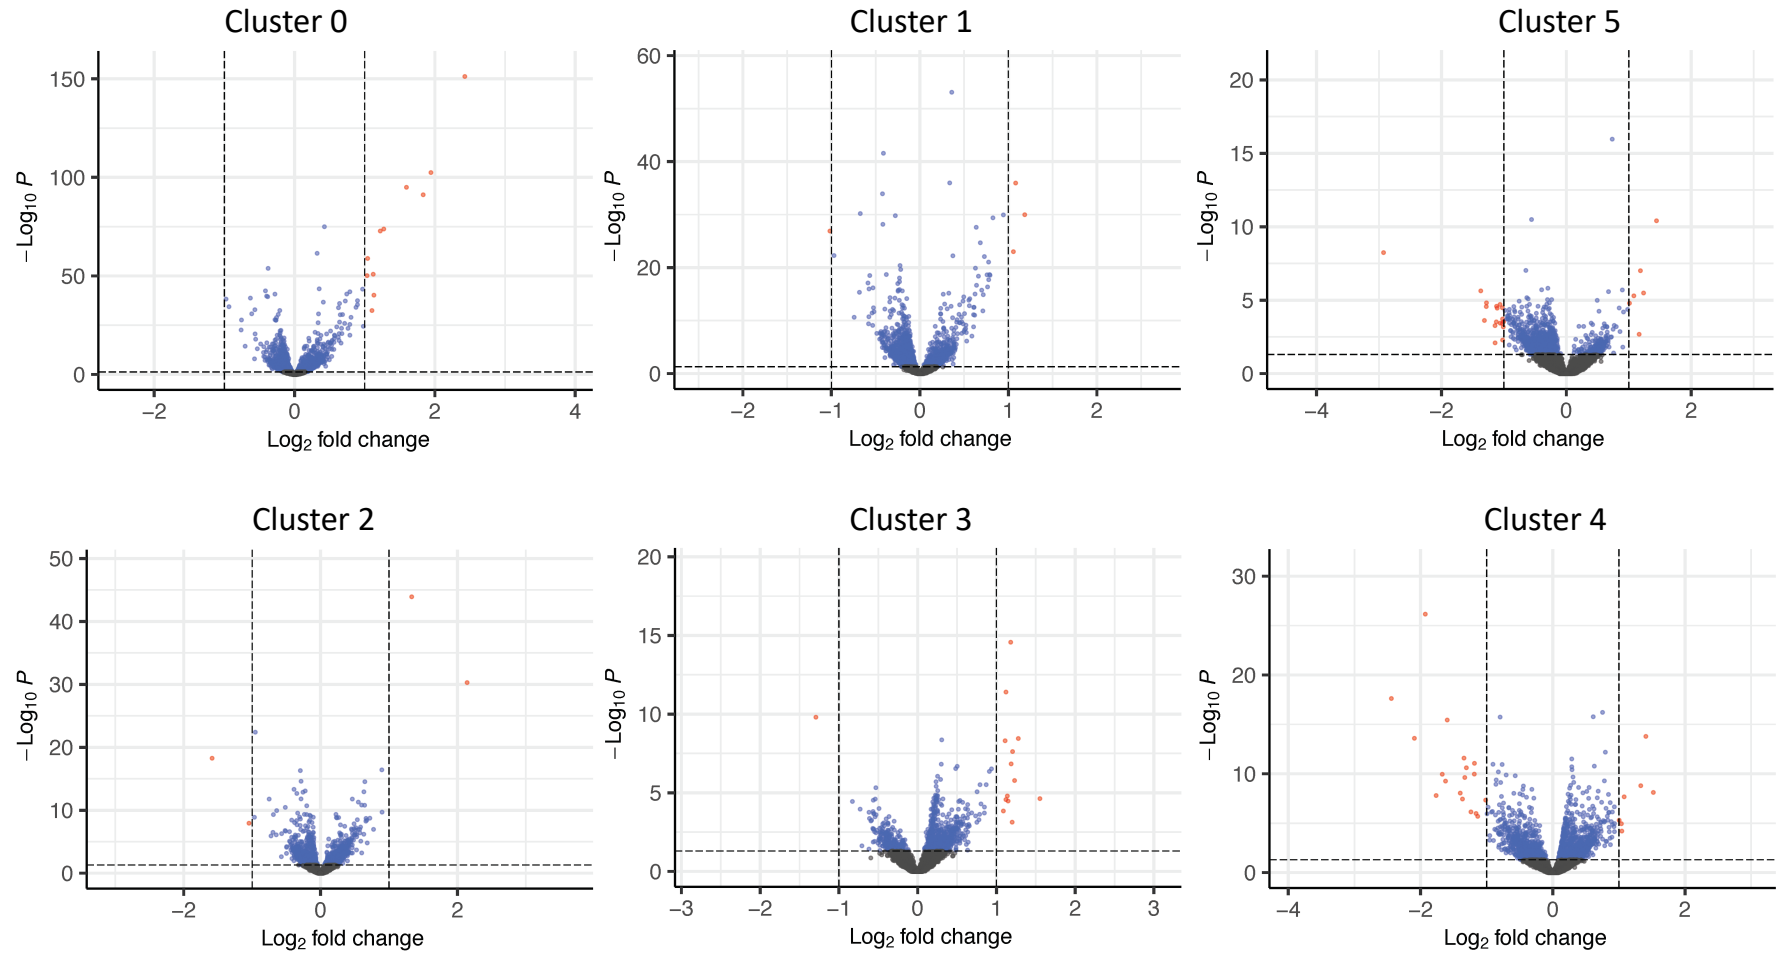

**Suppl. Fig. 4F**

E+L 1.0  $\mu$ M versus E+L 0.1  $\mu$ M

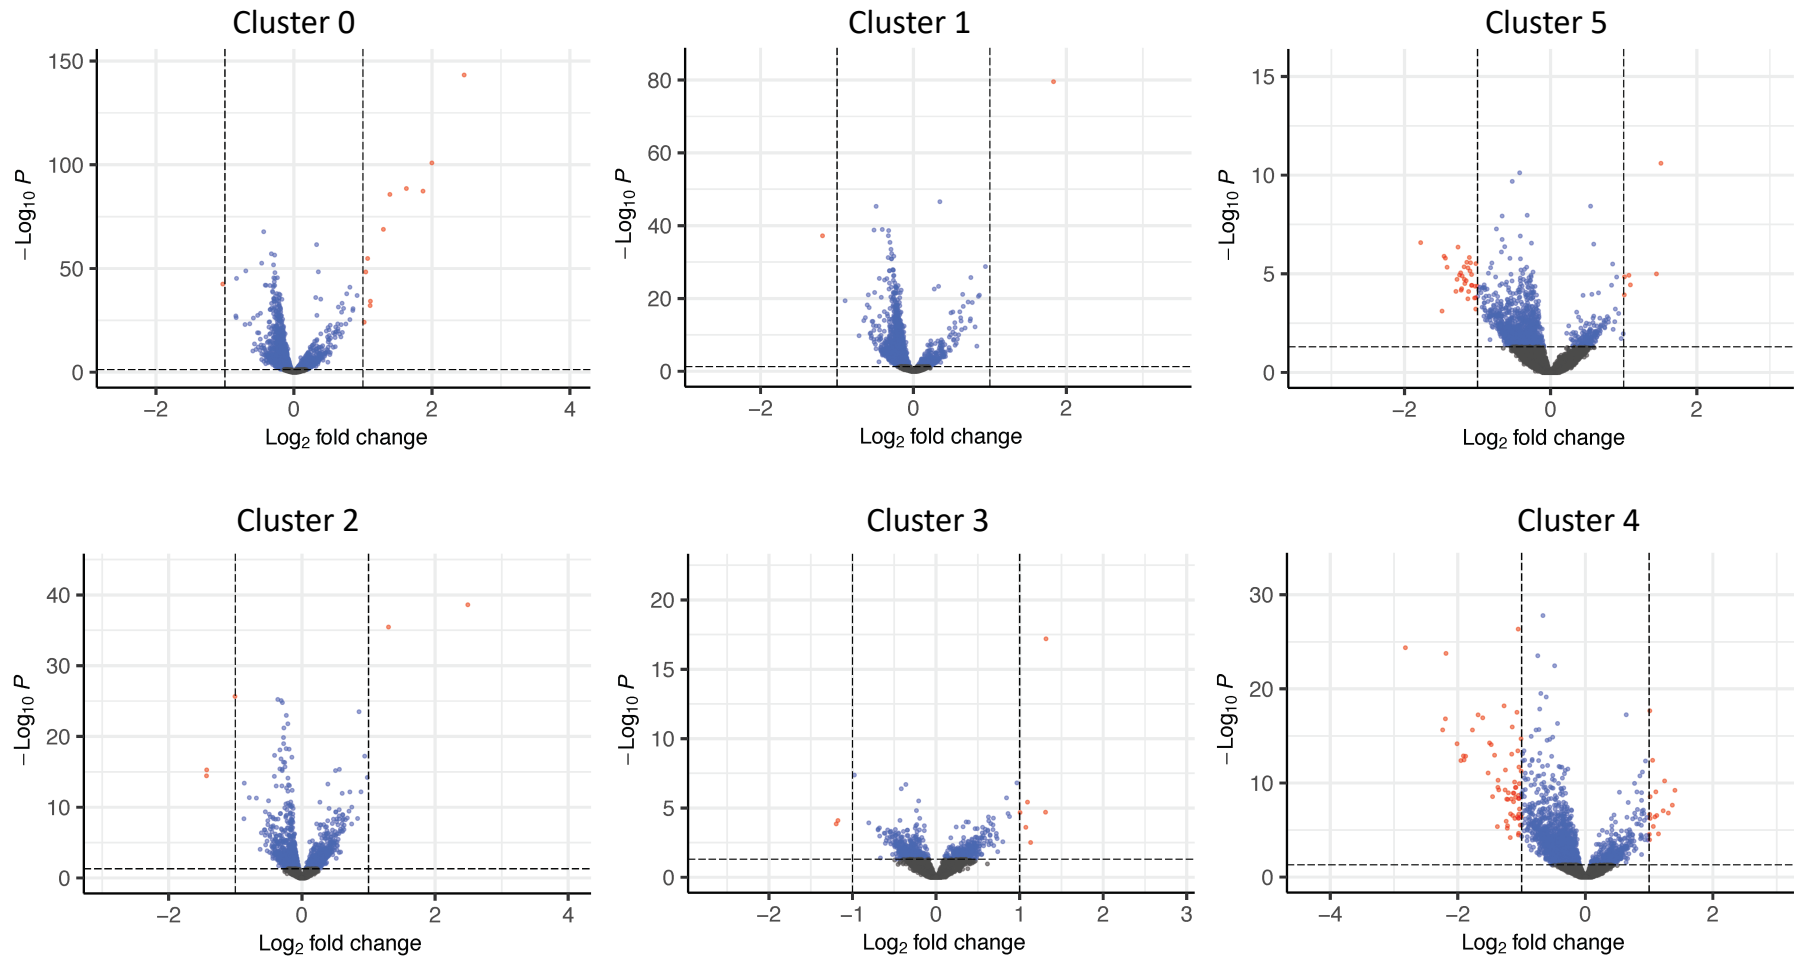

Supplement: NIHMS1710729-supplement-4.pdf [file NIHMS1710729-supplement-4.pdf]
