# Supplementary material
Source: PubMed Central journal article supplement (PMC8761390)
Supplement: NIHMS1710729-supplement-6.pdf [file NIHMS1710729-supplement-6.pdf]

**Supplementary Table 1: RT-qPCR primers**

| <b>Gene</b>  | <b>Forward primer</b> | <b>Reverse Primer</b> |
|--------------|-----------------------|-----------------------|
| <i>ACTB</i>  | CTGTGGCATCCACGAACTA   | AGCACTGTGTTGGCGTACAG  |
| <i>FOXG1</i> | CAACGGCATCTACGAGTTCA  | TGCTTGTTCTCGCGGTAGTA  |
| <i>MAP2</i>  | AAAGCTGATGAGGGCAAGAA  | GGCCCCTGAATAAATTCCAT  |
| <i>OTX2</i>  | TCACCAGCCATCTCAATCAG  | CCAAGCAGTCAGCATTGAAG  |
| <i>SOX1</i>  | AAGGCAGGTCCAAGCACTTA  | ACCCAAAAGAGCGGTAACAA  |
| <i>TUBB3</i> | CATGGACGAGATGGAGTTCA  | TTCGTACATCTCGCCCTTT   |
| <i>WPRE*</i> | CAGGCAACGTGGCGTGGTGT  | GGACGTCCCGCGCAGAATCC  |

\* Used to test for episomal integration during reprogramming of fibroblasts into hiPSCs
