# Supplementary material
Source: PubMed Central journal article supplement (PMC8761390)
Supplement: NIHMS1710729-supplement-7.pdf [file NIHMS1710729-supplement-7.pdf]

**Supplementary Table 2. 'FindAllMarkers' output.** cluster=cluster being compared to all other clusters; prop.1=portion of cells in cluster expressing gene; prop.2=portion of cells in all other clusters expressing gene. prop.all=portion of all cells expressing gene

| gene     | p_val    | avg_logFC | prop.1 | prop.2 | p_val_adj | cluster | prop.all |
|----------|----------|-----------|--------|--------|-----------|---------|----------|
| ADAMTS6  | 0        | 0.261052  | 0.528  | 0.305  | 0         | 0       | 0.390142 |
| APEX1    | 0        | 0.258354  | 0.975  | 0.933  | 0         | 0       | 0.949362 |
| B3GAT2   | 0        | 0.484539  | 0.845  | 0.478  | 0         | 0       | 0.618493 |
| BTF3     | 0        | 0.29361   | 0.992  | 0.989  | 0         | 0       | 0.990548 |
| C19orf48 | 0        | 0.372028  | 0.823  | 0.541  | 0         | 0       | 0.648662 |
| C1orf61  | 0        | 0.571101  | 0.997  | 0.904  | 0         | 0       | 0.939377 |
| CCNB1IP1 | 0        | 0.262375  | 0.881  | 0.744  | 0         | 0       | 0.796098 |
| CCND1    | 0        | 0.361711  | 0.824  | 0.491  | 0         | 0       | 0.618422 |
| CCND2    | 0        | 0.471183  | 0.938  | 0.744  | 0         | 0       | 0.817881 |
| CD99     | 0        | 0.256954  | 0.868  | 0.626  | 0         | 0       | 0.718382 |
| CDCA7    | 0        | 0.456426  | 0.673  | 0.29   | 0         | 0       | 0.436445 |
| CDK4     | 0        | 0.399563  | 0.941  | 0.754  | 0         | 0       | 0.825379 |
| CDT1     | 0        | 0.384004  | 0.727  | 0.385  | 0         | 0       | 0.515831 |
| CENPV    | 0        | 0.250388  | 0.985  | 0.962  | 0         | 0       | 0.970861 |
| CHEK1    | 0        | 0.299926  | 0.689  | 0.435  | 0         | 0       | 0.531964 |
| CLNS1A   | 0        | 0.304863  | 0.943  | 0.816  | 0         | 0       | 0.864539 |
| CLSPN    | 3.2E-288 | 0.250399  | 0.551  | 0.344  | 1.1E-283  | 0       | 0.423119 |
| CMBL     | 0        | 0.390926  | 0.802  | 0.525  | 0         | 0       | 0.630752 |
| CNBP     | 0        | 0.303777  | 0.958  | 0.867  | 0         | 0       | 0.901851 |
| COL4A6   | 0        | 0.250444  | 0.641  | 0.42   | 0         | 0       | 0.504353 |
| CREB5    | 0        | 0.364634  | 0.734  | 0.427  | 0         | 0       | 0.544117 |
| CTNNA1   | 0        | 0.29839   | 0.723  | 0.436  | 0         | 0       | 0.545503 |
| DACH1    | 0        | 0.365732  | 0.843  | 0.563  | 0         | 0       | 0.669877 |
| DCTPP1   | 0        | 0.434259  | 0.869  | 0.656  | 0         | 0       | 0.737572 |
| DEK      | 0        | 0.329308  | 0.987  | 0.892  | 0         | 0       | 0.928219 |
| DNMT1    | 0        | 0.33647   | 0.864  | 0.693  | 0         | 0       | 0.758146 |
| DOK5     | 0        | 0.283648  | 0.865  | 0.649  | 0         | 0       | 0.731673 |
| DUT      | 0        | 0.420293  | 0.913  | 0.765  | 0         | 0       | 0.821435 |
| E2F1     | 0        | 0.296116  | 0.51   | 0.219  | 0         | 0       | 0.330337 |
| EEF1D    | 0        | 0.345995  | 0.993  | 0.953  | 0         | 0       | 0.968267 |
| EFHD1    | 0        | 0.309834  | 0.725  | 0.448  | 0         | 0       | 0.553641 |
| EFNA4    | 0        | 0.254126  | 0.583  | 0.344  | 0         | 0       | 0.434988 |
| EMX2     | 0        | 0.347198  | 0.957  | 0.695  | 0         | 0       | 0.79489  |
| ENO1     | 0        | 0.416679  | 0.99   | 0.944  | 0         | 0       | 0.961871 |
| FABP7    | 0        | 0.657822  | 0.954  | 0.74   | 0         | 0       | 0.821577 |
| FBL      | 0        | 0.320788  | 0.851  | 0.634  | 0         | 0       | 0.716961 |
| FGFBP3   | 0        | 0.286383  | 0.697  | 0.496  | 0         | 0       | 0.573221 |
| FHL1     | 0        | 0.273177  | 0.916  | 0.785  | 0         | 0       | 0.83469  |
| GAPDH    | 0        | 0.39771   | 0.998  | 0.999  | 0         | 0       | 0.998614 |
| GAS1     | 0        | 0.479703  | 0.9    | 0.504  | 0         | 0       | 0.655378 |
| GCSH     | 0        | 0.273462  | 0.936  | 0.829  | 0         | 0       | 0.869514 |
| GGCT     | 0        | 0.312703  | 0.82   | 0.625  | 0         | 0       | 0.699655 |
| GINS2    | 0        | 0.682152  | 0.88   | 0.47   | 0         | 0       | 0.62663  |
| GLI3     | 0        | 0.51019   | 0.882  | 0.489  | 0         | 0       | 0.638854 |
| GLO1     | 0        | 0.250035  | 0.931  | 0.824  | 0         | 0       | 0.864788 |

|           |          |          |       |       |          |   |          |
|-----------|----------|----------|-------|-------|----------|---|----------|
| GMNN      | 0        | 0.265182 | 0.743 | 0.507 | 0        | 0 | 0.5971   |
| GNAI2     | 0        | 0.406445 | 0.987 | 0.929 | 0        | 0 | 0.951317 |
| GNL3      | 0        | 0.29496  | 0.748 | 0.551 | 0        | 0 | 0.626381 |
| GPC1      | 0        | 0.360494 | 0.822 | 0.616 | 0        | 0 | 0.694787 |
| GPC4      | 0        | 0.314632 | 0.637 | 0.365 | 0        | 0 | 0.468462 |
| HDCC2     | 0        | 0.256089 | 0.857 | 0.701 | 0        | 0 | 0.760634 |
| HELLS     | 0        | 0.522671 | 0.866 | 0.488 | 0        | 0 | 0.632671 |
| HES1      | 0        | 0.432792 | 0.957 | 0.565 | 0        | 0 | 0.714793 |
| HES4      | 0        | 0.30179  | 0.959 | 0.837 | 0        | 0 | 0.883799 |
| HES5      | 0        | 0.446434 | 0.832 | 0.477 | 0        | 0 | 0.612594 |
| HEY1      | 0        | 0.413764 | 0.788 | 0.558 | 0        | 0 | 0.646032 |
| HMGA2     | 0        | 0.612446 | 0.947 | 0.562 | 0        | 0 | 0.709108 |
| HMGN3     | 0        | 0.380212 | 0.988 | 0.91  | 0        | 0 | 0.93959  |
| HNRNPA1   | 0        | 0.334712 | 0.998 | 0.997 | 0        | 0 | 0.997335 |
| HNRNPC    | 0        | 0.295826 | 0.981 | 0.937 | 0        | 0 | 0.95384  |
| HNRNPF    | 0        | 0.334906 | 0.955 | 0.865 | 0        | 0 | 0.899613 |
| HNRNPM    | 0        | 0.276169 | 0.972 | 0.923 | 0        | 0 | 0.942006 |
| HSP90AB1  | 0        | 0.274762 | 0.997 | 0.996 | 0        | 0 | 0.996411 |
| HSPD1     | 0        | 0.407313 | 0.988 | 0.95  | 0        | 0 | 0.964784 |
| HSPE1     | 0        | 0.376094 | 0.985 | 0.949 | 0        | 0 | 0.962439 |
| ID3       | 1.3E-275 | 0.49055  | 0.661 | 0.477 | 4.5E-271 | 0 | 0.547493 |
| ID4       | 0        | 0.691353 | 0.995 | 0.79  | 0        | 0 | 0.868413 |
| IFI44L    | 0        | 0.493046 | 0.738 | 0.365 | 0        | 0 | 0.507303 |
| IMPDH2    | 0        | 0.250107 | 0.81  | 0.629 | 0        | 0 | 0.697879 |
| INTU      | 0        | 0.389072 | 0.79  | 0.533 | 0        | 0 | 0.630965 |
| LAPTM4B   | 0        | 0.299733 | 0.943 | 0.793 | 0        | 0 | 0.850467 |
| LDHB      | 0        | 0.335739 | 0.996 | 0.995 | 0        | 0 | 0.995096 |
| LEF1      | 0        | 0.431616 | 0.807 | 0.465 | 0        | 0 | 0.595466 |
| LINC01551 | 0        | 0.285804 | 0.912 | 0.731 | 0        | 0 | 0.800149 |
| LIX1      | 0        | 0.538092 | 0.873 | 0.437 | 0        | 0 | 0.603426 |
| LRRC3B    | 0        | 0.361178 | 0.682 | 0.381 | 0        | 0 | 0.496073 |
| MCM2      | 0        | 0.352394 | 0.597 | 0.272 | 0        | 0 | 0.396503 |
| MCM3      | 0        | 0.659342 | 0.858 | 0.428 | 0        | 0 | 0.591983 |
| MCM4      | 0        | 0.464956 | 0.717 | 0.356 | 0        | 0 | 0.493799 |
| MCM5      | 0        | 0.647161 | 0.791 | 0.312 | 0        | 0 | 0.494865 |
| MCM6      | 0        | 0.454731 | 0.625 | 0.231 | 0        | 0 | 0.381507 |
| MCM7      | 0        | 0.569362 | 0.954 | 0.669 | 0        | 0 | 0.77794  |
| MPPED2    | 0        | 0.31973  | 0.807 | 0.55  | 0        | 0 | 0.648058 |
| MRPL11    | 0        | 0.315839 | 0.882 | 0.695 | 0        | 0 | 0.76632  |
| MSH6      | 0        | 0.460301 | 0.834 | 0.566 | 0        | 0 | 0.668526 |
| MYCN      | 0        | 0.262564 | 0.698 | 0.478 | 0        | 0 | 0.561814 |
| NACA      | 0        | 0.263975 | 0.998 | 0.998 | 0        | 0 | 0.997726 |
| NAP1L1    | 0        | 0.441648 | 0.997 | 0.973 | 0        | 0 | 0.982339 |
| NASP      | 0        | 0.565557 | 0.991 | 0.922 | 0        | 0 | 0.948438 |
| NCL       | 0        | 0.311944 | 0.993 | 0.978 | 0        | 0 | 0.984009 |
| NES       | 0        | 0.306658 | 0.763 | 0.496 | 0        | 0 | 0.598024 |
| NHP2      | 0        | 0.271284 | 0.935 | 0.858 | 0        | 0 | 0.887317 |
| NME1      | 0        | 0.280896 | 0.971 | 0.931 | 0        | 0 | 0.946128 |

|        |   |          |       |       |   |   |          |
|--------|---|----------|-------|-------|---|---|----------|
| NME4   | 0 | 0.38678  | 0.974 | 0.884 | 0 | 0 | 0.918411 |
| NOP53  | 0 | 0.28156  | 0.929 | 0.817 | 0 | 0 | 0.85992  |
| NPM1   | 0 | 0.521434 | 0.997 | 0.993 | 0 | 0 | 0.994421 |
| OLFM3  | 0 | 0.278687 | 0.479 | 0.244 | 0 | 0 | 0.333641 |
| PABPC1 | 0 | 0.333062 | 0.979 | 0.91  | 0 | 0 | 0.936143 |
| PAICS  | 0 | 0.364097 | 0.917 | 0.711 | 0 | 0 | 0.789275 |
| PARP1  | 0 | 0.266299 | 0.952 | 0.862 | 0 | 0 | 0.896557 |
| PCNA   | 0 | 0.42691  | 0.816 | 0.539 | 0 | 0 | 0.645073 |
| PGM1   | 0 | 0.279755 | 0.624 | 0.366 | 0 | 0 | 0.464163 |
| PHGDH  | 0 | 0.261369 | 0.97  | 0.774 | 0 | 0 | 0.848797 |
| PKM    | 0 | 0.312529 | 0.987 | 0.928 | 0 | 0 | 0.950428 |
| PLAGL1 | 0 | 0.291615 | 0.669 | 0.458 | 0 | 0 | 0.538538 |
| PNN    | 0 | 0.271894 | 0.974 | 0.917 | 0 | 0 | 0.938986 |
| PPA1   | 0 | 0.285327 | 0.986 | 0.948 | 0 | 0 | 0.962475 |
| PRKDC  | 0 | 0.311493 | 0.943 | 0.833 | 0 | 0 | 0.874702 |
| PSAT1  | 0 | 0.257842 | 0.872 | 0.609 | 0 | 0 | 0.70957  |
| PSMG1  | 0 | 0.272526 | 0.678 | 0.445 | 0 | 0 | 0.534096 |
| PXMP2  | 0 | 0.256734 | 0.839 | 0.653 | 0 | 0 | 0.723997 |
| QKI    | 0 | 0.306152 | 0.875 | 0.645 | 0 | 0 | 0.733094 |
| RACK1  | 0 | 0.35942  | 0.999 | 0.997 | 0 | 0 | 0.99769  |
| RAN    | 0 | 0.257736 | 0.993 | 0.987 | 0 | 0 | 0.989517 |
| RANBP1 | 0 | 0.284889 | 0.987 | 0.952 | 0 | 0 | 0.96546  |
| RCN1   | 0 | 0.292198 | 0.906 | 0.637 | 0 | 0 | 0.739846 |
| RFC1   | 0 | 0.27056  | 0.82  | 0.641 | 0 | 0 | 0.709108 |
| RFC2   | 0 | 0.287518 | 0.673 | 0.423 | 0 | 0 | 0.518603 |
| RFC4   | 0 | 0.279819 | 0.703 | 0.487 | 0 | 0 | 0.569738 |
| RPA3   | 0 | 0.266838 | 0.853 | 0.644 | 0 | 0 | 0.724068 |
| RPL10A | 0 | 0.344648 | 0.997 | 0.996 | 0 | 0 | 0.996233 |
| RPL12  | 0 | 0.383081 | 0.998 | 0.996 | 0 | 0 | 0.99634  |
| RPL13  | 0 | 0.321505 | 1     | 1     | 0 | 0 | 0.99968  |
| RPL13A | 0 | 0.250208 | 0.994 | 0.983 | 0 | 0 | 0.987456 |
| RPL14  | 0 | 0.267442 | 0.998 | 0.996 | 0 | 0 | 0.996979 |
| RPL17  | 0 | 0.300208 | 0.923 | 0.797 | 0 | 0 | 0.845066 |
| RPL18  | 0 | 0.252869 | 0.998 | 0.998 | 0 | 0 | 0.998294 |
| RPL18A | 0 | 0.34342  | 0.999 | 0.998 | 0 | 0 | 0.99865  |
| RPL19  | 0 | 0.291706 | 0.998 | 0.999 | 0 | 0 | 0.998579 |
| RPL21  | 0 | 0.297437 | 0.998 | 0.995 | 0 | 0 | 0.99634  |
| RPL22  | 0 | 0.314794 | 0.997 | 0.995 | 0 | 0 | 0.995736 |
| RPL23A | 0 | 0.341276 | 0.995 | 0.993 | 0 | 0 | 0.993781 |
| RPL26  | 0 | 0.291676 | 0.998 | 0.997 | 0 | 0 | 0.997584 |
| RPL27A | 0 | 0.295508 | 0.995 | 0.99  | 0 | 0 | 0.991791 |
| RPL28  | 0 | 0.265523 | 0.998 | 0.998 | 0 | 0 | 0.998117 |
| RPL29  | 0 | 0.271273 | 0.998 | 0.998 | 0 | 0 | 0.997903 |
| RPL3   | 0 | 0.279644 | 1     | 0.999 | 0 | 0 | 0.999289 |
| RPL30  | 0 | 0.251038 | 0.998 | 0.998 | 0 | 0 | 0.998259 |
| RPL32  | 0 | 0.260207 | 0.999 | 0.999 | 0 | 0 | 0.998614 |
| RPL35  | 0 | 0.364599 | 0.999 | 0.997 | 0 | 0 | 0.99737  |
| RPL35A | 0 | 0.267992 | 0.999 | 0.998 | 0 | 0 | 0.998081 |

|        |   |          |       |       |   |   |          |
|--------|---|----------|-------|-------|---|---|----------|
| RPL36  | 0 | 0.272069 | 0.997 | 0.997 | 0 | 0 | 0.997122 |
| RPL36A | 0 | 0.296397 | 0.985 | 0.953 | 0 | 0 | 0.965246 |
| RPL39  | 0 | 0.263652 | 0.999 | 0.998 | 0 | 0 | 0.998081 |
| RPL4   | 0 | 0.306139 | 0.995 | 0.992 | 0 | 0 | 0.99339  |
| RPL41  | 0 | 0.340001 | 0.999 | 0.999 | 0 | 0 | 0.998934 |
| RPL5   | 0 | 0.347987 | 0.999 | 0.998 | 0 | 0 | 0.998508 |
| RPL6   | 0 | 0.295758 | 0.999 | 0.998 | 0 | 0 | 0.998543 |
| RPL7   | 0 | 0.337002 | 0.995 | 0.987 | 0 | 0 | 0.990157 |
| RPL7A  | 0 | 0.322117 | 0.999 | 0.999 | 0 | 0 | 0.998969 |
| RPL8   | 0 | 0.341218 | 0.999 | 0.998 | 0 | 0 | 0.998223 |
| RPL9   | 0 | 0.264762 | 0.998 | 0.998 | 0 | 0 | 0.998046 |
| RPLP0  | 0 | 0.401949 | 0.997 | 0.993 | 0 | 0 | 0.994172 |
| RPLP1  | 0 | 0.282645 | 0.999 | 0.999 | 0 | 0 | 0.998969 |
| RPS10  | 0 | 0.256835 | 0.995 | 0.992 | 0 | 0 | 0.993106 |
| RPS12  | 0 | 0.26036  | 0.998 | 0.998 | 0 | 0 | 0.998436 |
| RPS14  | 0 | 0.33152  | 0.999 | 0.999 | 0 | 0 | 0.998792 |
| RPS15  | 0 | 0.356295 | 0.999 | 0.999 | 0 | 0 | 0.998934 |
| RPS15A | 0 | 0.299579 | 0.998 | 0.998 | 0 | 0 | 0.99801  |
| RPS16  | 0 | 0.273974 | 0.996 | 0.992 | 0 | 0 | 0.993497 |
| RPS18  | 0 | 0.34639  | 0.999 | 0.999 | 0 | 0 | 0.999041 |
| RPS19  | 0 | 0.298337 | 0.999 | 0.999 | 0 | 0 | 0.999076 |
| RPS2   | 0 | 0.416564 | 0.999 | 0.999 | 0 | 0 | 0.998934 |
| RPS21  | 0 | 0.279848 | 0.995 | 0.988 | 0 | 0 | 0.990477 |
| RPS23  | 0 | 0.309696 | 0.999 | 0.998 | 0 | 0 | 0.998294 |
| RPS24  | 0 | 0.331244 | 0.999 | 0.999 | 0 | 0 | 0.998969 |
| RPS25  | 0 | 0.281716 | 0.995 | 0.996 | 0 | 0 | 0.995558 |
| RPS27A | 0 | 0.289611 | 0.998 | 0.999 | 0 | 0 | 0.998365 |
| RPS27L | 0 | 0.46721  | 0.981 | 0.855 | 0 | 0 | 0.903415 |
| RPS29  | 0 | 0.28119  | 0.996 | 0.996 | 0 | 0 | 0.996269 |
| RPS3   | 0 | 0.329656 | 0.999 | 0.999 | 0 | 0 | 0.998792 |
| RPS3A  | 0 | 0.312466 | 0.999 | 0.999 | 0 | 0 | 0.998721 |
| RPS5   | 0 | 0.283696 | 0.998 | 0.996 | 0 | 0 | 0.996979 |
| RPS6   | 0 | 0.418634 | 0.999 | 0.997 | 0 | 0 | 0.997513 |
| RPS7   | 0 | 0.368616 | 0.998 | 0.998 | 0 | 0 | 0.997974 |
| RPS8   | 0 | 0.295041 | 0.999 | 0.999 | 0 | 0 | 0.998863 |
| RPS9   | 0 | 0.269717 | 0.998 | 0.997 | 0 | 0 | 0.997619 |
| RPSA   | 0 | 0.348568 | 0.998 | 0.997 | 0 | 0 | 0.997548 |
| RSL1D1 | 0 | 0.303022 | 0.914 | 0.784 | 0 | 0 | 0.833837 |
| SERBP1 | 0 | 0.298013 | 0.993 | 0.972 | 0 | 0 | 0.979709 |
| SFRP1  | 0 | 0.670827 | 0.979 | 0.66  | 0 | 0 | 0.781991 |
| SIVA1  | 0 | 0.271446 | 0.941 | 0.81  | 0 | 0 | 0.860168 |
| SNRPA  | 0 | 0.27573  | 0.818 | 0.639 | 0 | 0 | 0.707331 |
| SNRPB  | 0 | 0.411829 | 0.984 | 0.877 | 0 | 0 | 0.917842 |
| SNRPD1 | 0 | 0.334922 | 0.983 | 0.944 | 0 | 0 | 0.95885  |
| SNRPD2 | 0 | 0.299644 | 0.967 | 0.896 | 0 | 0 | 0.922888 |
| SNRPF  | 0 | 0.260965 | 0.983 | 0.954 | 0 | 0 | 0.965069 |
| SOX2   | 0 | 0.476429 | 0.984 | 0.576 | 0 | 0 | 0.731815 |
| SOX3   | 0 | 0.395514 | 0.814 | 0.462 | 0 | 0 | 0.596247 |

|           |   |          |       |       |   |   |          |
|-----------|---|----------|-------|-------|---|---|----------|
| SRSF2     | 0 | 0.284803 | 0.975 | 0.906 | 0 | 0 | 0.932696 |
| SRSF7     | 0 | 0.28417  | 0.984 | 0.948 | 0 | 0 | 0.961586 |
| STOX1     | 0 | 0.314604 | 0.553 | 0.275 | 0 | 0 | 0.38101  |
| SYNE2     | 0 | 0.320881 | 0.956 | 0.846 | 0 | 0 | 0.88785  |
| TLE4      | 0 | 0.333505 | 0.844 | 0.581 | 0 | 0 | 0.681106 |
| TMEM123   | 0 | 0.319579 | 0.81  | 0.529 | 0 | 0 | 0.636402 |
| TMEM161E  | 0 | 0.432036 | 0.922 | 0.69  | 0 | 0 | 0.778473 |
| TPD52L1   | 0 | 0.314154 | 0.522 | 0.305 | 0 | 0 | 0.387655 |
| TPI1      | 0 | 0.28109  | 0.986 | 0.954 | 0 | 0 | 0.966206 |
| TTYH1     | 0 | 0.623674 | 0.992 | 0.769 | 0 | 0 | 0.85395  |
| UHRF1     | 0 | 0.339177 | 0.55  | 0.268 | 0 | 0 | 0.375928 |
| UNG       | 0 | 0.511664 | 0.684 | 0.285 | 0 | 0 | 0.437191 |
| VCAN      | 0 | 0.496879 | 0.95  | 0.673 | 0 | 0 | 0.778437 |
| VIM       | 0 | 0.529387 | 0.999 | 0.926 | 0 | 0 | 0.953875 |
| ZFP36L1   | 0 | 0.499358 | 0.929 | 0.543 | 0 | 0 | 0.690807 |
| AL031777. | 0 | 0.316178 | 0.374 | 0.025 | 0 | 1 | 0.112967 |
| ANLN      | 0 | 0.251226 | 0.408 | 0.07  | 0 | 1 | 0.154934 |
| ANP32B    | 0 | 0.321327 | 0.974 | 0.861 | 0 | 1 | 0.889663 |
| ANP32E    | 0 | 0.610188 | 0.955 | 0.684 | 0 | 1 | 0.751857 |
| APOLD1    | 0 | 0.284317 | 0.366 | 0.044 | 0 | 1 | 0.125369 |
| ARHGAP11  | 0 | 0.375294 | 0.504 | 0.084 | 0 | 1 | 0.189581 |
| ARL6IP1   | 0 | 0.80341  | 0.825 | 0.633 | 0 | 1 | 0.681248 |
| ASPM      | 0 | 1.158701 | 0.828 | 0.17  | 0 | 1 | 0.335383 |
| ATAD2     | 0 | 0.427156 | 0.728 | 0.321 | 0 | 1 | 0.423048 |
| AURKA     | 0 | 0.644328 | 0.528 | 0.064 | 0 | 1 | 0.180626 |
| AURKB     | 0 | 0.924017 | 0.828 | 0.104 | 0 | 1 | 0.286344 |
| B3GAT2    | 0 | 0.268148 | 0.852 | 0.54  | 0 | 1 | 0.618493 |
| BIRC5     | 0 | 1.101768 | 0.94  | 0.3   | 0 | 1 | 0.460822 |
| BRCA1     | 0 | 0.251146 | 0.599 | 0.255 | 0 | 1 | 0.341708 |
| BTG3      | 0 | 0.355211 | 0.899 | 0.633 | 0 | 1 | 0.699833 |
| BUB1      | 0 | 0.395171 | 0.462 | 0.051 | 0 | 1 | 0.154721 |
| BUB1B     | 0 | 0.521481 | 0.651 | 0.111 | 0 | 1 | 0.246473 |
| BUB3      | 0 | 0.569225 | 0.849 | 0.574 | 0 | 1 | 0.643367 |
| C21orf58  | 0 | 0.568811 | 0.784 | 0.249 | 0 | 1 | 0.383959 |
| CCDC18    | 0 | 0.321111 | 0.51  | 0.13  | 0 | 1 | 0.225863 |
| CCDC34    | 0 | 0.338277 | 0.814 | 0.509 | 0 | 1 | 0.58548  |
| CCNA2     | 0 | 0.768302 | 0.764 | 0.107 | 0 | 1 | 0.272272 |
| CCNB1     | 0 | 1.277247 | 0.745 | 0.192 | 0 | 1 | 0.330905 |
| CCNB2     | 0 | 1.041669 | 0.814 | 0.299 | 0 | 1 | 0.428414 |
| CDC20     | 0 | 1.159838 | 0.661 | 0.143 | 0 | 1 | 0.273089 |
| CDC25B    | 0 | 0.369799 | 0.518 | 0.142 | 0 | 1 | 0.23631  |
| CDCA2     | 0 | 0.433198 | 0.512 | 0.052 | 0 | 1 | 0.167762 |
| CDCA3     | 0 | 0.816708 | 0.664 | 0.057 | 0 | 1 | 0.209978 |
| CDCA4     | 0 | 0.394772 | 0.693 | 0.277 | 0 | 1 | 0.381792 |
| CDCA5     | 0 | 0.478576 | 0.68  | 0.126 | 0 | 1 | 0.265662 |
| CDCA8     | 0 | 0.593733 | 0.599 | 0.06  | 0 | 1 | 0.195729 |
| CDK1      | 0 | 1.022704 | 0.854 | 0.185 | 0 | 1 | 0.353506 |
| CDK5RAP2  | 0 | 0.316607 | 0.705 | 0.37  | 0 | 1 | 0.454071 |

|         |          |          |       |       |          |   |          |
|---------|----------|----------|-------|-------|----------|---|----------|
| CDKN3   | 0        | 0.895766 | 0.79  | 0.224 | 0        | 1 | 0.366796 |
| CENPA   | 0        | 0.666866 | 0.527 | 0.068 | 0        | 1 | 0.183576 |
| CENPE   | 0        | 0.863569 | 0.664 | 0.111 | 0        | 1 | 0.250133 |
| CENPF   | 0        | 1.553067 | 0.963 | 0.422 | 0        | 1 | 0.558473 |
| CENPH   | 0        | 0.461174 | 0.889 | 0.475 | 0        | 1 | 0.579404 |
| CENPK   | 0        | 0.409156 | 0.751 | 0.302 | 0        | 1 | 0.415408 |
| CENPM   | 0        | 0.447293 | 0.762 | 0.273 | 0        | 1 | 0.396112 |
| CENPN   | 0        | 0.322762 | 0.611 | 0.2   | 0        | 1 | 0.303649 |
| CENPU   | 0        | 0.486037 | 0.908 | 0.45  | 0        | 1 | 0.564976 |
| CENPW   | 0        | 0.527403 | 0.869 | 0.396 | 0        | 1 | 0.515085 |
| CEP135  | 0        | 0.27301  | 0.536 | 0.17  | 0        | 1 | 0.262393 |
| CEP55   | 0        | 0.395893 | 0.499 | 0.065 | 0        | 1 | 0.173945 |
| CHEK1   | 0        | 0.255426 | 0.764 | 0.454 | 0        | 1 | 0.531964 |
| CIP2A   | 0        | 0.30014  | 0.529 | 0.134 | 0        | 1 | 0.233716 |
| CKAP2   | 0        | 0.753547 | 0.838 | 0.329 | 0        | 1 | 0.457375 |
| CKAP2L  | 0        | 0.520427 | 0.59  | 0.063 | 0        | 1 | 0.195551 |
| CKAP5   | 0        | 0.369328 | 0.721 | 0.403 | 0        | 1 | 0.48289  |
| CKB     | 0        | 0.305869 | 1     | 0.994 | 0        | 1 | 0.995451 |
| CKS1B   | 0        | 1.026665 | 0.969 | 0.513 | 0        | 1 | 0.627519 |
| CKS2    | 0        | 1.242735 | 0.953 | 0.576 | 0        | 1 | 0.670587 |
| CLSPN   | 0        | 0.257344 | 0.651 | 0.346 | 0        | 1 | 0.423119 |
| CMC2    | 0        | 0.267763 | 0.761 | 0.456 | 0        | 1 | 0.532923 |
| CNTRL   | 0        | 0.303489 | 0.633 | 0.303 | 0        | 1 | 0.386127 |
| DBF4    | 0        | 0.562442 | 0.786 | 0.348 | 0        | 1 | 0.457908 |
| DCP2    | 0        | 0.271254 | 0.669 | 0.356 | 0        | 1 | 0.434775 |
| DCXR    | 0        | 0.396699 | 0.909 | 0.726 | 0        | 1 | 0.772218 |
| DDX39A  | 0        | 0.414007 | 0.809 | 0.487 | 0        | 1 | 0.568068 |
| DEK     | 0        | 0.431539 | 0.992 | 0.907 | 0        | 1 | 0.928219 |
| DEPDC1  | 0        | 0.389099 | 0.481 | 0.059 | 0        | 1 | 0.164955 |
| DEPDC1B | 0        | 0.450701 | 0.609 | 0.124 | 0        | 1 | 0.246331 |
| DHFR    | 0        | 0.351157 | 0.722 | 0.398 | 0        | 1 | 0.479727 |
| DIAPH3  | 0        | 0.25165  | 0.43  | 0.086 | 0        | 1 | 0.17256  |
| DLGAP5  | 0        | 0.993502 | 0.749 | 0.107 | 0        | 1 | 0.268718 |
| DMRTA2  | 0        | 0.424293 | 0.881 | 0.569 | 0        | 1 | 0.64756  |
| DNAJC9  | 0        | 0.254986 | 0.819 | 0.535 | 0        | 1 | 0.606766 |
| DTYMK   | 0        | 0.516434 | 0.923 | 0.59  | 0        | 1 | 0.673715 |
| DUT     | 4.6E-286 | 0.294117 | 0.946 | 0.779 | 1.5E-281 | 1 | 0.821435 |
| ECI1    | 0        | 0.257593 | 0.875 | 0.583 | 0        | 1 | 0.656444 |
| ECT2    | 0        | 0.604287 | 0.67  | 0.144 | 0        | 1 | 0.276358 |
| EFHD1   | 0        | 0.252975 | 0.787 | 0.475 | 0        | 1 | 0.553641 |
| EGR1    | 1.8E-301 | 0.260882 | 0.632 | 0.374 | 6.2E-297 | 1 | 0.439075 |
| EMC9    | 0        | 0.318182 | 0.62  | 0.295 | 0        | 1 | 0.376746 |
| EMX2    | 0        | 0.291227 | 0.953 | 0.742 | 0        | 1 | 0.79489  |
| ESCO2   | 0        | 0.348239 | 0.519 | 0.09  | 0        | 1 | 0.197648 |
| EXOSC8  | 0        | 0.285838 | 0.889 | 0.649 | 0        | 1 | 0.709321 |
| EZH2    | 0        | 0.288561 | 0.882 | 0.645 | 0        | 1 | 0.704488 |
| FAM83D  | 0        | 0.311347 | 0.392 | 0.05  | 0        | 1 | 0.135816 |
| FANCD2  | 0        | 0.262961 | 0.474 | 0.117 | 0        | 1 | 0.207171 |



|           |          |          |       |       |          |   |          |
|-----------|----------|----------|-------|-------|----------|---|----------|
| FANCI     | 0        | 0.322433 | 0.612 | 0.207 | 0        | 1 | 0.308909 |
| FBLN1     | 0        | 0.333255 | 0.948 | 0.722 | 0        | 1 | 0.779041 |
| FBXO5     | 0        | 0.526968 | 0.727 | 0.26  | 0        | 1 | 0.377705 |
| FOS       | 0        | 0.428869 | 0.802 | 0.561 | 0        | 1 | 0.621904 |
| FOXM1     | 0        | 0.45548  | 0.649 | 0.094 | 0        | 1 | 0.233716 |
| GAS1      | 0        | 0.421882 | 0.916 | 0.568 | 0        | 1 | 0.655378 |
| GMNN      | 0        | 0.323035 | 0.86  | 0.509 | 0        | 1 | 0.5971   |
| GPSM2     | 0        | 0.335332 | 0.511 | 0.183 | 0        | 1 | 0.265698 |
| GTSE1     | 0        | 0.855096 | 0.76  | 0.103 | 0        | 1 | 0.268292 |
| H1FX      | 0        | 0.389238 | 0.993 | 0.979 | 0        | 1 | 0.982197 |
| H2AFV     | 0        | 0.49509  | 0.982 | 0.857 | 0        | 1 | 0.888312 |
| H2AFX     | 0        | 1.056073 | 0.974 | 0.542 | 0        | 1 | 0.651185 |
| H2AFZ     | 0        | 0.704365 | 0.999 | 0.989 | 0        | 1 | 0.991791 |
| HES1      | 0        | 0.588123 | 0.962 | 0.632 | 0        | 1 | 0.714793 |
| HES4      | 0        | 0.331139 | 0.96  | 0.858 | 0        | 1 | 0.883799 |
| HIST1H1B  | 0        | 1.391401 | 0.738 | 0.083 | 0        | 1 | 0.248108 |
| HIST1H1C  | 0        | 1.154177 | 0.764 | 0.286 | 0        | 1 | 0.406098 |
| HIST1H1D  | 0        | 1.04101  | 0.66  | 0.114 | 0        | 1 | 0.251661 |
| HIST1H1E  | 0        | 0.730787 | 0.674 | 0.174 | 0        | 1 | 0.300025 |
| HIST1H2AG | 0        | 0.551123 | 0.582 | 0.076 | 0        | 1 | 0.203546 |
| HIST1H2AJ | 0        | 0.325203 | 0.392 | 0.026 | 0        | 1 | 0.118297 |
| HIST1H2AL | 0        | 0.334519 | 0.387 | 0.025 | 0        | 1 | 0.116023 |
| HIST1H2BH | 0        | 0.509049 | 0.688 | 0.165 | 0        | 1 | 0.296223 |
| HIST1H3B  | 0        | 0.616467 | 0.594 | 0.046 | 0        | 1 | 0.184144 |
| HIST1H3G  | 0        | 0.268761 | 0.348 | 0.03  | 0        | 1 | 0.110337 |
| HIST1H4C  | 0        | 2.432767 | 0.972 | 0.944 | 0        | 1 | 0.951068 |
| HIST2H2AC | 0        | 0.898411 | 0.715 | 0.192 | 0        | 1 | 0.323869 |
| HJURP     | 0        | 0.50655  | 0.598 | 0.065 | 0        | 1 | 0.19946  |
| HMGA2     | 0        | 0.29868  | 0.94  | 0.631 | 0        | 1 | 0.709108 |
| HMGB1     | 0        | 0.582869 | 1     | 0.998 | 0        | 1 | 0.998543 |
| HMGB2     | 0        | 1.494623 | 0.99  | 0.567 | 0        | 1 | 0.673501 |
| HMGB3     | 0        | 0.44997  | 0.968 | 0.881 | 0        | 1 | 0.902882 |
| HMGN2     | 0        | 0.632578 | 1     | 0.982 | 0        | 1 | 0.986816 |
| HMGN3     | 0        | 0.273704 | 0.988 | 0.923 | 0        | 1 | 0.93959  |
| HMGN5     | 0        | 0.266576 | 0.692 | 0.375 | 0        | 1 | 0.454994 |
| HMMR      | 0        | 0.600792 | 0.588 | 0.089 | 0        | 1 | 0.214882 |
| HNRNPA2B  | 0        | 0.337643 | 0.998 | 0.996 | 0        | 1 | 0.996553 |
| HNRNPH3   | 0        | 0.2554   | 0.983 | 0.954 | 0        | 1 | 0.961373 |
| ID1       | 3.4E-304 | 0.301147 | 0.675 | 0.403 | 1.2E-299 | 1 | 0.471128 |
| ID3       | 3.9E-192 | 0.294034 | 0.715 | 0.491 | 1.3E-187 | 1 | 0.547493 |
| ID4       | 0        | 0.335117 | 0.994 | 0.826 | 0        | 1 | 0.868413 |
| IER2      | 0        | 0.372971 | 0.87  | 0.682 | 0        | 1 | 0.729185 |
| INCENP    | 0        | 0.269063 | 0.42  | 0.075 | 0        | 1 | 0.161935 |
| ITGB3BP   | 0        | 0.317644 | 0.719 | 0.345 | 0        | 1 | 0.439217 |
| KIF11     | 0        | 0.630961 | 0.729 | 0.134 | 0        | 1 | 0.283821 |
| KIF14     | 0        | 0.280241 | 0.361 | 0.036 | 0        | 1 | 0.117658 |
| KIF15     | 0        | 0.532645 | 0.697 | 0.142 | 0        | 1 | 0.282115 |
| KIF18A    | 0        | 0.341442 | 0.461 | 0.068 | 0        | 1 | 0.166981 |

|          |   |          |       |       |   |   |          |
|----------|---|----------|-------|-------|---|---|----------|
| KIF20A   | 0 | 0.267353 | 0.357 | 0.028 | 0 | 1 | 0.110373 |
| KIF20B   | 0 | 0.686921 | 0.773 | 0.239 | 0 | 1 | 0.373476 |
| KIF22    | 0 | 0.667653 | 0.843 | 0.321 | 0 | 1 | 0.452471 |
| KIF23    | 0 | 0.575936 | 0.633 | 0.089 | 0 | 1 | 0.225436 |
| KIF2C    | 0 | 0.570161 | 0.614 | 0.068 | 0 | 1 | 0.205536 |
| KIF4A    | 0 | 0.497028 | 0.589 | 0.087 | 0 | 1 | 0.213461 |
| KIFC1    | 0 | 0.768061 | 0.797 | 0.108 | 0 | 1 | 0.281653 |
| KNL1     | 0 | 0.478105 | 0.564 | 0.078 | 0 | 1 | 0.200277 |
| KNSTRN   | 0 | 0.534153 | 0.622 | 0.193 | 0 | 1 | 0.300771 |
| KPNA2    | 0 | 1.342627 | 0.927 | 0.619 | 0 | 1 | 0.696741 |
| LBR      | 0 | 0.355516 | 0.844 | 0.601 | 0 | 1 | 0.662485 |
| LIX1     | 0 | 0.289126 | 0.875 | 0.512 | 0 | 1 | 0.603426 |
| LMNB1    | 0 | 0.398554 | 0.882 | 0.605 | 0 | 1 | 0.674638 |
| MAD2L1   | 0 | 0.868358 | 0.949 | 0.366 | 0 | 1 | 0.51281  |
| MELK     | 0 | 0.336684 | 0.552 | 0.112 | 0 | 1 | 0.22302  |
| MGME1    | 0 | 0.271944 | 0.656 | 0.301 | 0 | 1 | 0.390285 |
| MIS18A   | 0 | 0.296034 | 0.756 | 0.404 | 0 | 1 | 0.492662 |
| MIS18BP1 | 0 | 0.731123 | 0.825 | 0.263 | 0 | 1 | 0.404321 |
| MKI67    | 0 | 1.258673 | 0.91  | 0.208 | 0 | 1 | 0.384386 |
| MND1     | 0 | 0.469659 | 0.74  | 0.211 | 0 | 1 | 0.344195 |
| MRPL51   | 0 | 0.264488 | 0.97  | 0.912 | 0 | 1 | 0.926406 |
| MXD3     | 0 | 0.706838 | 0.713 | 0.089 | 0 | 1 | 0.24626  |
| MYBL2    | 0 | 0.542738 | 0.744 | 0.245 | 0 | 1 | 0.370349 |
| MZT1     | 0 | 0.433293 | 0.756 | 0.413 | 0 | 1 | 0.499485 |
| NAP1L1   | 0 | 0.272206 | 0.997 | 0.977 | 0 | 1 | 0.982339 |
| NCAPD2   | 0 | 0.399733 | 0.586 | 0.138 | 0 | 1 | 0.251199 |
| NCAPG    | 0 | 0.622431 | 0.75  | 0.145 | 0 | 1 | 0.297075 |
| NCAPH    | 0 | 0.30445  | 0.477 | 0.075 | 0 | 1 | 0.176362 |
| NDC80    | 0 | 0.761521 | 0.768 | 0.102 | 0 | 1 | 0.269464 |
| NEK2     | 0 | 0.484688 | 0.467 | 0.053 | 0 | 1 | 0.157599 |
| NUCKS1   | 0 | 0.54983  | 0.993 | 0.97  | 0 | 1 | 0.976049 |
| NUDCD2   | 0 | 0.448029 | 0.847 | 0.616 | 0 | 1 | 0.674034 |
| NUDT1    | 0 | 0.29047  | 0.937 | 0.745 | 0 | 1 | 0.793398 |
| NUF2     | 0 | 0.745014 | 0.766 | 0.116 | 0 | 1 | 0.279414 |
| NUSAP1   | 0 | 1.414172 | 0.964 | 0.309 | 0 | 1 | 0.473615 |
| OIP5     | 0 | 0.265502 | 0.45  | 0.094 | 0 | 1 | 0.18354  |
| ORC6     | 0 | 0.460142 | 0.875 | 0.43  | 0 | 1 | 0.542127 |
| PAX6     | 0 | 0.386851 | 0.932 | 0.653 | 0 | 1 | 0.722753 |
| PBK      | 0 | 0.851778 | 0.865 | 0.151 | 0 | 1 | 0.330763 |
| PCLAF    | 0 | 0.79186  | 0.954 | 0.484 | 0 | 1 | 0.602075 |
| PHF19    | 0 | 0.26941  | 0.566 | 0.222 | 0 | 1 | 0.308731 |
| PHGDH    | 0 | 0.495391 | 0.985 | 0.803 | 0 | 1 | 0.848797 |
| PIF1     | 0 | 0.640072 | 0.376 | 0.029 | 0 | 1 | 0.116414 |
| PIMREG   | 0 | 1.003118 | 0.89  | 0.206 | 0 | 1 | 0.378451 |
| PLK1     | 0 | 0.870417 | 0.551 | 0.074 | 0 | 1 | 0.19381  |
| POC1A    | 0 | 0.300141 | 0.536 | 0.128 | 0 | 1 | 0.230766 |
| PRC1     | 0 | 0.572711 | 0.683 | 0.132 | 0 | 1 | 0.270815 |
| PRR11    | 0 | 0.415706 | 0.517 | 0.089 | 0 | 1 | 0.197115 |



|          |          |          |       |       |          |   |          |
|----------|----------|----------|-------|-------|----------|---|----------|
| PSAT1    | 0        | 0.336663 | 0.921 | 0.638 | 0        | 1 | 0.70957  |
| PSIP1    | 0        | 0.274445 | 0.985 | 0.957 | 0        | 1 | 0.963789 |
| PSRC1    | 0        | 0.669108 | 0.587 | 0.101 | 0        | 1 | 0.223269 |
| PTTG1    | 0        | 1.231729 | 0.942 | 0.427 | 0        | 1 | 0.556412 |
| PXMP2    | 7E-291   | 0.255352 | 0.878 | 0.672 | 2.4E-286 | 1 | 0.723997 |
| RACGAP1  | 0        | 0.472335 | 0.593 | 0.091 | 0        | 1 | 0.217014 |
| RAD21    | 0        | 0.41825  | 0.883 | 0.672 | 0        | 1 | 0.72517  |
| RAD51AP1 | 0        | 0.454086 | 0.707 | 0.228 | 0        | 1 | 0.348566 |
| RANBP1   | 0        | 0.273731 | 0.992 | 0.957 | 0        | 1 | 0.96546  |
| RBMX     | 0        | 0.261095 | 0.978 | 0.939 | 0        | 1 | 0.948971 |
| RHEB     | 0        | 0.26558  | 0.949 | 0.862 | 0        | 1 | 0.883551 |
| RHNO1    | 0        | 0.253197 | 0.615 | 0.304 | 0        | 1 | 0.382147 |
| RPA3     | 0        | 0.31858  | 0.923 | 0.657 | 0        | 1 | 0.724068 |
| RRM1     | 0        | 0.33318  | 0.844 | 0.527 | 0        | 1 | 0.606446 |
| RRM2     | 0        | 0.445479 | 0.643 | 0.149 | 0        | 1 | 0.273267 |
| RTKN2    | 0        | 0.475958 | 0.668 | 0.138 | 0        | 1 | 0.271348 |
| SAE1     | 0        | 0.250262 | 0.807 | 0.549 | 0        | 1 | 0.614122 |
| SAP30    | 0        | 0.34752  | 0.868 | 0.63  | 0        | 1 | 0.689528 |
| SAPCD2   | 0        | 0.369327 | 0.434 | 0.081 | 0        | 1 | 0.17025  |
| SEPHS1   | 0        | 0.293643 | 0.838 | 0.615 | 0        | 1 | 0.671049 |
| SFPQ     | 3.4E-254 | 0.254139 | 0.98  | 0.967 | 1.1E-249 | 1 | 0.97047  |
| SFRP1    | 0        | 0.401899 | 0.974 | 0.717 | 0        | 1 | 0.781991 |
| SGO1     | 0        | 0.605276 | 0.735 | 0.135 | 0        | 1 | 0.286095 |
| SGO2     | 0        | 0.838674 | 0.673 | 0.102 | 0        | 1 | 0.246082 |
| SKA2     | 0        | 0.29021  | 0.926 | 0.795 | 0        | 1 | 0.827831 |
| SKA3     | 0        | 0.321424 | 0.507 | 0.088 | 0        | 1 | 0.193277 |
| SMC2     | 0        | 0.595246 | 0.895 | 0.398 | 0        | 1 | 0.523222 |
| SMC4     | 0        | 0.904859 | 0.93  | 0.443 | 0        | 1 | 0.565829 |
| SNRPB    | 0        | 0.279905 | 0.987 | 0.895 | 0        | 1 | 0.917842 |
| SOX2     | 0        | 0.471994 | 0.973 | 0.651 | 0        | 1 | 0.731815 |
| SOX3     | 0        | 0.314683 | 0.851 | 0.51  | 0        | 1 | 0.596247 |
| SPAG5    | 0        | 0.317872 | 0.505 | 0.089 | 0        | 1 | 0.193312 |
| SPC24    | 0        | 0.275419 | 0.444 | 0.071 | 0        | 1 | 0.164777 |
| SPC25    | 0        | 0.756278 | 0.819 | 0.118 | 0        | 1 | 0.29473  |
| SPDL1    | 0        | 0.276432 | 0.507 | 0.161 | 0        | 1 | 0.24825  |
| TACC3    | 0        | 0.496576 | 0.62  | 0.087 | 0        | 1 | 0.221172 |
| TK1      | 0        | 0.313823 | 0.58  | 0.166 | 0        | 1 | 0.270495 |
| TMEM123  | 0        | 0.294267 | 0.859 | 0.561 | 0        | 1 | 0.636402 |
| TMPO     | 0        | 0.531404 | 0.956 | 0.78  | 0        | 1 | 0.824455 |
| TOP2A    | 0        | 1.683864 | 0.948 | 0.253 | 0        | 1 | 0.427845 |
| TPX2     | 0        | 1.11961  | 0.859 | 0.174 | 0        | 1 | 0.346256 |
| TRIP13   | 0        | 0.258309 | 0.492 | 0.123 | 0        | 1 | 0.2157   |
| TROAP    | 0        | 0.387615 | 0.482 | 0.094 | 0        | 1 | 0.19182  |
| TTK      | 0        | 0.564736 | 0.619 | 0.071 | 0        | 1 | 0.208806 |
| TTYH1    | 0        | 0.322759 | 0.99  | 0.808 | 0        | 1 | 0.85395  |
| TUBA1B   | 0        | 0.774712 | 1     | 0.99  | 0        | 1 | 0.992538 |
| TUBB4B   | 0        | 1.182369 | 0.983 | 0.846 | 0        | 1 | 0.880424 |
| TUBB6    | 0        | 0.472898 | 0.711 | 0.275 | 0        | 1 | 0.384635 |

|           |          |          |       |       |          |   |          |
|-----------|----------|----------|-------|-------|----------|---|----------|
| TYMS      | 0        | 0.58389  | 0.917 | 0.532 | 0        | 1 | 0.628904 |
| UBE2C     | 0        | 1.71452  | 0.914 | 0.195 | 0        | 1 | 0.376248 |
| UBE2S     | 0        | 0.846653 | 0.975 | 0.819 | 0        | 1 | 0.858178 |
| UBE2T     | 0        | 0.74306  | 0.945 | 0.548 | 0        | 1 | 0.648236 |
| USP1      | 0        | 0.318603 | 0.869 | 0.585 | 0        | 1 | 0.656373 |
| VIM       | 0        | 0.455136 | 1     | 0.938 | 0        | 1 | 0.953875 |
| VRK1      | 0        | 0.301515 | 0.809 | 0.453 | 0        | 1 | 0.542767 |
| WEE1      | 0        | 0.268746 | 0.657 | 0.318 | 0        | 1 | 0.402971 |
| XRCC2     | 0        | 0.262616 | 0.523 | 0.186 | 0        | 1 | 0.270815 |
| ZFP36L1   | 0        | 0.282576 | 0.913 | 0.616 | 0        | 1 | 0.690807 |
| ZWINT     | 0        | 0.537597 | 0.847 | 0.29  | 0        | 1 | 0.430582 |
| MARCH6    | 2.5E-253 | 0.27809  | 0.804 | 0.697 | 8.4E-249 | 2 | 0.716997 |
| SEPT3     | 0        | 0.610059 | 0.773 | 0.376 | 0        | 2 | 0.449842 |
| SEPT6     | 0        | 0.459559 | 0.582 | 0.3   | 0        | 2 | 0.352475 |
| AAK1      | 0        | 0.450546 | 0.758 | 0.498 | 0        | 2 | 0.546356 |
| AASDHPPT  | 0        | 0.319311 | 0.782 | 0.641 | 0        | 2 | 0.666892 |
| ABRACL    | 0        | 0.933438 | 0.941 | 0.657 | 0        | 2 | 0.70925  |
| AC004158. | 0        | 0.715554 | 0.507 | 0.018 | 0        | 2 | 0.108347 |
| AC009414. | 0        | 0.283667 | 0.414 | 0.155 | 0        | 2 | 0.203262 |
| ACAP3     | 0        | 0.279127 | 0.488 | 0.225 | 0        | 2 | 0.273906 |
| ACAT2     | 0        | 0.453288 | 0.981 | 0.939 | 0        | 2 | 0.946413 |
| ACLY      | 0        | 0.338955 | 0.694 | 0.491 | 0        | 2 | 0.528979 |
| ACOT7     | 0        | 0.395256 | 0.74  | 0.469 | 0        | 2 | 0.519313 |
| ACSL4     | 0        | 0.252015 | 0.383 | 0.149 | 0        | 2 | 0.192282 |
| ACTB      | 0        | 0.591032 | 1     | 0.998 | 0        | 2 | 0.998614 |
| ACTL6B    | 0        | 0.576973 | 0.623 | 0.066 | 0        | 2 | 0.169468 |
| ACTR10    | 0        | 0.307818 | 0.698 | 0.489 | 0        | 2 | 0.52802  |
| ACTR1A    | 0        | 0.412298 | 0.812 | 0.572 | 0        | 2 | 0.616929 |
| ADGRB2    | 0        | 0.306546 | 0.567 | 0.348 | 0        | 2 | 0.388401 |
| ADGRG1    | 5.7E-295 | 0.337206 | 0.691 | 0.506 | 1.9E-290 | 2 | 0.539959 |
| AES       | 0        | 0.289897 | 0.959 | 0.896 | 0        | 2 | 0.907502 |
| AFAP1     | 0        | 0.268328 | 0.377 | 0.128 | 0        | 2 | 0.17391  |
| AFDN      | 0        | 0.377555 | 0.923 | 0.817 | 0        | 2 | 0.837106 |
| AFF3      | 4.7E-233 | 0.252935 | 0.462 | 0.273 | 1.6E-228 | 2 | 0.308091 |
| AGAP1     | 0        | 0.298652 | 0.553 | 0.307 | 0        | 2 | 0.352688 |
| AGAP3     | 3E-304   | 0.262724 | 0.537 | 0.311 | 1E-299   | 2 | 0.353008 |
| AHDC1     | 0        | 0.275786 | 0.419 | 0.157 | 0        | 2 | 0.205679 |
| AKAP14    | 0        | 0.255785 | 0.284 | 0.025 | 0        | 2 | 0.072919 |
| AKAP6     | 0        | 0.269605 | 0.356 | 0.071 | 0        | 2 | 0.123485 |
| AKAP9     | 0        | 0.540269 | 0.947 | 0.797 | 0        | 2 | 0.825237 |
| AKR1C1    | 0        | 0.307133 | 0.379 | 0.055 | 0        | 2 | 0.115312 |
| AKT3      | 0        | 0.662552 | 0.76  | 0.335 | 0        | 2 | 0.413596 |
| AL356479. | 0        | 0.317849 | 0.205 | 0.003 | 0        | 2 | 0.040155 |
| AL391807. | 7.9E-245 | 0.299649 | 0.514 | 0.322 | 2.7E-240 | 2 | 0.35745  |
| ALDH2     | 3.4E-252 | 0.303384 | 0.806 | 0.7   | 1.1E-247 | 2 | 0.719306 |
| AMER2     | 0        | 0.844135 | 0.792 | 0.159 | 0        | 2 | 0.275967 |
| AMN1      | 0        | 0.329344 | 0.459 | 0.144 | 0        | 2 | 0.202658 |
| ANK2      | 0        | 0.343524 | 0.455 | 0.167 | 0        | 2 | 0.220035 |

|          |          |          |       |       |          |   |          |
|----------|----------|----------|-------|-------|----------|---|----------|
| ANK3     | 0        | 0.856174 | 0.83  | 0.175 | 0        | 2 | 0.296294 |
| ANKRD12  | 0        | 0.382754 | 0.905 | 0.752 | 0        | 2 | 0.780569 |
| ANKRD46  | 0        | 0.273539 | 0.585 | 0.348 | 0        | 2 | 0.392061 |
| AP1S1    | 2.4E-275 | 0.275034 | 0.819 | 0.709 | 8.1E-271 | 2 | 0.729043 |
| AP2B1    | 1.1E-228 | 0.261413 | 0.754 | 0.641 | 3.6E-224 | 2 | 0.661952 |
| APBA2    | 2.9E-262 | 0.255472 | 0.574 | 0.374 | 9.7E-258 | 2 | 0.411393 |
| APBB1    | 0        | 0.315698 | 0.573 | 0.307 | 0        | 2 | 0.356171 |
| APC      | 0        | 0.356858 | 0.684 | 0.451 | 0        | 2 | 0.494261 |
| APC2     | 0        | 0.456756 | 0.722 | 0.349 | 0        | 2 | 0.418322 |
| APLP1    | 0        | 0.983597 | 0.955 | 0.546 | 0        | 2 | 0.621833 |
| APP      | 5.3E-271 | 0.276181 | 0.804 | 0.69  | 1.8E-266 | 2 | 0.711275 |
| ARF3     | 0        | 0.367618 | 0.729 | 0.533 | 0        | 2 | 0.569489 |
| ARF4     | 0        | 0.366618 | 0.88  | 0.735 | 0        | 2 | 0.761736 |
| ARHGAP21 | 0        | 0.394019 | 0.799 | 0.605 | 0        | 2 | 0.640667 |
| ARHGEF12 | 7.6E-299 | 0.275613 | 0.528 | 0.307 | 2.6E-294 | 2 | 0.348353 |
| ARHGEF2  | 0        | 0.303728 | 0.488 | 0.21  | 0        | 2 | 0.261291 |
| ARHGEF9  | 0        | 0.354502 | 0.67  | 0.411 | 0        | 2 | 0.459223 |
| ARL4D    | 0        | 0.733552 | 0.712 | 0.308 | 0        | 2 | 0.383142 |
| ARL8A    | 0        | 0.410732 | 0.734 | 0.446 | 0        | 2 | 0.499058 |
| ARMCX3   | 1.4E-259 | 0.262793 | 0.709 | 0.537 | 4.8E-255 | 2 | 0.568672 |
| ARPC2    | 0        | 0.308858 | 0.974 | 0.946 | 0        | 2 | 0.951246 |
| ARPC3    | 0        | 0.310337 | 0.979 | 0.946 | 0        | 2 | 0.951636 |
| ARPC5    | 0        | 0.395044 | 0.901 | 0.786 | 0        | 2 | 0.80715  |
| ASXL3    | 0        | 0.253951 | 0.402 | 0.149 | 0        | 2 | 0.196084 |
| ATAT1    | 0        | 0.411227 | 0.743 | 0.455 | 0        | 2 | 0.508546 |
| ATCAY    | 0        | 0.499442 | 0.764 | 0.4   | 0        | 2 | 0.467787 |
| ATL1     | 0        | 0.359563 | 0.692 | 0.403 | 0        | 2 | 0.456807 |
| ATOX1    | 6E-241   | 0.259756 | 0.896 | 0.85  | 2E-236   | 2 | 0.858569 |
| ATP1A3   | 0        | 0.592314 | 0.669 | 0.128 | 0        | 2 | 0.228492 |
| ATP1B3   | 1.3E-284 | 0.290265 | 0.936 | 0.884 | 4.3E-280 | 2 | 0.894069 |
| ATP5F1B  | 0        | 0.275807 | 0.992 | 0.981 | 0        | 2 | 0.982836 |
| ATP5F1E  | 0        | 0.300339 | 0.996 | 0.991 | 0        | 2 | 0.992147 |
| ATP5MD   | 0        | 0.32618  | 0.961 | 0.925 | 0        | 2 | 0.931559 |
| ATP5PF   | 0        | 0.264995 | 0.99  | 0.979 | 0        | 2 | 0.980953 |
| ATP5PO   | 0        | 0.276563 | 0.978 | 0.957 | 0        | 2 | 0.96052  |
| ATP6AP2  | 1.1E-240 | 0.26228  | 0.78  | 0.659 | 3.7E-236 | 2 | 0.681426 |
| ATP6V0A1 | 0        | 0.285665 | 0.529 | 0.282 | 0        | 2 | 0.32792  |
| ATP6V0B  | 0        | 0.727857 | 0.982 | 0.817 | 0        | 2 | 0.847873 |
| ATP6V0D1 | 0        | 0.341064 | 0.729 | 0.498 | 0        | 2 | 0.54067  |
| ATP6V0E2 | 0        | 0.731572 | 0.943 | 0.657 | 0        | 2 | 0.710103 |
| ATP6V1A  | 0        | 0.272667 | 0.444 | 0.182 | 0        | 2 | 0.230589 |
| ATP6V1F  | 0        | 0.479312 | 0.975 | 0.915 | 0        | 2 | 0.926122 |
| ATP6V1G1 | 0        | 0.565999 | 0.993 | 0.962 | 0        | 2 | 0.967983 |
| ATP6V1G2 | 0        | 0.439348 | 0.571 | 0.161 | 0        | 2 | 0.237376 |
| ATP6V1H  | 0        | 0.259656 | 0.547 | 0.311 | 0        | 2 | 0.354749 |
| ATP8A2   | 0        | 0.269114 | 0.338 | 0.087 | 0        | 2 | 0.133933 |
| ATP9A    | 0        | 0.264148 | 0.455 | 0.2   | 0        | 2 | 0.247219 |
| ATRX     | 0        | 0.365536 | 0.933 | 0.875 | 0        | 2 | 0.885612 |

|           |          |          |       |       |          |   |          |
|-----------|----------|----------|-------|-------|----------|---|----------|
| ATXN7L3B  | 0        | 0.389182 | 0.909 | 0.789 | 0        | 2 | 0.811698 |
| AUTS2     | 0        | 1.169348 | 0.878 | 0.461 | 0        | 2 | 0.538431 |
| B3GAT1    | 0        | 0.719248 | 0.74  | 0.194 | 0        | 2 | 0.294979 |
| BAD       | 4.8E-275 | 0.276254 | 0.791 | 0.66  | 1.6E-270 | 2 | 0.68402  |
| BAG6      | 1.4E-240 | 0.255869 | 0.734 | 0.595 | 4.7E-236 | 2 | 0.621051 |
| BAIAP2-DT | 0        | 0.344392 | 0.49  | 0.211 | 0        | 2 | 0.262251 |
| BASP1     | 0        | 0.695902 | 0.999 | 0.993 | 0        | 2 | 0.993995 |
| BCHE      | 0        | 0.696419 | 0.418 | 0.049 | 0        | 2 | 0.117124 |
| BCL11A    | 0        | 0.782284 | 0.956 | 0.803 | 0        | 2 | 0.831776 |
| BCL11B    | 0        | 0.84779  | 0.806 | 0.237 | 0        | 2 | 0.342063 |
| BCL7A     | 0        | 0.398756 | 0.835 | 0.647 | 0        | 2 | 0.681959 |
| BEX1      | 0        | 0.480539 | 0.991 | 0.935 | 0        | 2 | 0.945524 |
| BEX2      | 0        | 0.69321  | 0.963 | 0.819 | 0        | 2 | 0.845848 |
| BEX4      | 0        | 0.295072 | 0.941 | 0.889 | 0        | 2 | 0.898937 |
| BHLHE22   | 0        | 1.258411 | 0.667 | 0.028 | 0        | 2 | 0.146406 |
| BICD1     | 0        | 0.623165 | 0.797 | 0.39  | 0        | 2 | 0.465691 |
| BLCAP     | 0        | 0.306378 | 0.604 | 0.325 | 0        | 2 | 0.376532 |
| BLOC1S1   | 0        | 0.34085  | 0.929 | 0.865 | 0        | 2 | 0.876444 |
| BRD3      | 1.4E-283 | 0.287111 | 0.837 | 0.722 | 4.8E-279 | 2 | 0.743755 |
| BR13      | 0        | 0.284213 | 0.965 | 0.927 | 0        | 2 | 0.933727 |
| BRK1      | 0        | 0.301652 | 0.983 | 0.959 | 0        | 2 | 0.963008 |
| BRSK1     | 0        | 0.284903 | 0.44  | 0.149 | 0        | 2 | 0.202551 |
| BRSK2     | 0        | 0.277768 | 0.533 | 0.294 | 0        | 2 | 0.337977 |
| BZW2      | 0        | 0.579001 | 0.93  | 0.778 | 0        | 2 | 0.80587  |
| C11orf96  | 0        | 0.351106 | 0.326 | 0.059 | 0        | 2 | 0.10817  |
| C16orf45  | 0        | 0.353095 | 0.804 | 0.61  | 0        | 2 | 0.645677 |
| C18orf32  | 0        | 0.373493 | 0.603 | 0.288 | 0        | 2 | 0.346647 |
| C19orf12  | 2.4E-285 | 0.271082 | 0.544 | 0.337 | 8.1E-281 | 2 | 0.375111 |
| C1orf115  | 0        | 0.311308 | 0.324 | 0.073 | 0        | 2 | 0.119647 |
| C1orf122  | 0        | 0.380334 | 0.912 | 0.752 | 0        | 2 | 0.781813 |
| C1QTNF4   | 0        | 0.295196 | 0.598 | 0.362 | 0        | 2 | 0.406062 |
| C3orf14   | 0        | 0.555365 | 0.756 | 0.568 | 0        | 2 | 0.603212 |
| C4orf48   | 0        | 0.872658 | 0.998 | 0.962 | 0        | 2 | 0.968729 |
| C9orf16   | 0        | 0.468314 | 0.971 | 0.907 | 0        | 2 | 0.919264 |
| CACNA1A   | 0        | 0.374133 | 0.487 | 0.153 | 0        | 2 | 0.214918 |
| CACNA1E   | 0        | 0.27397  | 0.297 | 0.032 | 0        | 2 | 0.08134  |
| CACNA2D1  | 0        | 0.445413 | 0.514 | 0.123 | 0        | 2 | 0.195835 |
| CACNG8    | 0        | 0.337374 | 0.442 | 0.162 | 0        | 2 | 0.214136 |
| CADM1     | 2.1E-161 | 0.285657 | 0.749 | 0.692 | 7.1E-157 | 2 | 0.702392 |
| CALB2     | 0        | 0.921139 | 0.39  | 0.052 | 0        | 2 | 0.114317 |
| CALCOCO1  | 0        | 0.27873  | 0.412 | 0.151 | 0        | 2 | 0.199389 |
| CALM1     | 0        | 0.715875 | 0.996 | 0.989 | 0        | 2 | 0.99037  |
| CALM2     | 0        | 0.466015 | 0.997 | 0.988 | 0        | 2 | 0.989624 |
| CALM3     | 0        | 0.393088 | 0.981 | 0.939 | 0        | 2 | 0.947159 |
| CAMK1D    | 4.4E-274 | 0.272887 | 0.469 | 0.266 | 1.5E-269 | 2 | 0.303472 |
| CAMK2D    | 0        | 0.288346 | 0.449 | 0.219 | 0        | 2 | 0.261789 |
| CAMK2N1   | 0        | 0.81255  | 0.928 | 0.632 | 0        | 2 | 0.687182 |
| CAMK4     | 0        | 0.260942 | 0.448 | 0.217 | 0        | 2 | 0.260012 |

|          |          |          |       |       |          |   |          |
|----------|----------|----------|-------|-------|----------|---|----------|
| CAMKK2   | 0        | 0.262379 | 0.457 | 0.229 | 0        | 2 | 0.270921 |
| CAMKV    | 0        | 0.586831 | 0.577 | 0.108 | 0        | 2 | 0.194663 |
| CAP2     | 0        | 0.638847 | 0.683 | 0.29  | 0        | 2 | 0.362532 |
| CAPN1    | 3.2E-297 | 0.277585 | 0.581 | 0.364 | 1.1E-292 | 2 | 0.403895 |
| CASTOR3  | 0        | 0.324101 | 0.574 | 0.314 | 0        | 2 | 0.362532 |
| CBFA2T3  | 0        | 0.319956 | 0.411 | 0.111 | 0        | 2 | 0.166732 |
| CBLB     | 0        | 0.336008 | 0.418 | 0.132 | 0        | 2 | 0.184855 |
| CCDC107  | 6.2E-247 | 0.256871 | 0.721 | 0.568 | 2.1E-242 | 2 | 0.59639  |
| CCDC112  | 0        | 0.555159 | 0.87  | 0.578 | 0        | 2 | 0.631996 |
| CCDC28B  | 0        | 0.319984 | 0.798 | 0.632 | 0        | 2 | 0.662592 |
| CCDC82   | 0        | 0.28817  | 0.625 | 0.382 | 0        | 2 | 0.426673 |
| CCDC85B  | 1.2E-254 | 0.28318  | 0.821 | 0.719 | 4.2E-250 | 2 | 0.737643 |
| CCDC88A  | 3.6E-230 | 0.270885 | 0.811 | 0.69  | 1.2E-225 | 2 | 0.712199 |
| CCNG2    | 0        | 0.315033 | 0.62  | 0.351 | 0        | 2 | 0.401016 |
| CCNI     | 0        | 0.449445 | 0.996 | 0.99  | 0        | 2 | 0.990796 |
| CCSAP    | 0        | 1.027449 | 0.847 | 0.258 | 0        | 2 | 0.367222 |
| CCSER1   | 0        | 0.282448 | 0.307 | 0.038 | 0        | 2 | 0.087559 |
| CCSER2   | 7.1E-247 | 0.269066 | 0.594 | 0.415 | 2.4E-242 | 2 | 0.447745 |
| CD200    | 0        | 0.455919 | 0.644 | 0.244 | 0        | 2 | 0.317757 |
| CD24     | 0        | 0.902422 | 0.993 | 0.803 | 0        | 2 | 0.837959 |
| CDC42    | 0        | 0.424933 | 0.95  | 0.857 | 0        | 2 | 0.874205 |
| CDC42EP3 | 0        | 0.411815 | 0.522 | 0.183 | 0        | 2 | 0.246047 |
| CDH7     | 0        | 0.416136 | 0.25  | 0.051 | 0        | 2 | 0.087772 |
| CDK5     | 0        | 0.340974 | 0.584 | 0.308 | 0        | 2 | 0.358871 |
| CDK5R1   | 0        | 0.695197 | 0.768 | 0.214 | 0        | 2 | 0.316407 |
| CDKN1C   | 0        | 0.391223 | 0.472 | 0.193 | 0        | 2 | 0.244448 |
| CDKN2D   | 0        | 0.847629 | 0.887 | 0.28  | 0        | 2 | 0.392061 |
| CECR2    | 0        | 0.395742 | 0.562 | 0.335 | 0        | 2 | 0.377314 |
| CELF2    | 0        | 0.824115 | 0.948 | 0.745 | 0        | 2 | 0.782595 |
| CELF3    | 0        | 0.733039 | 0.755 | 0.095 | 0        | 2 | 0.217547 |
| CELF4    | 0        | 0.51867  | 0.637 | 0.135 | 0        | 2 | 0.227853 |
| CELF5    | 0        | 0.694737 | 0.843 | 0.348 | 0        | 2 | 0.44007  |
| CEND1    | 0        | 0.273984 | 0.466 | 0.215 | 0        | 2 | 0.261895 |
| CEP170   | 0        | 0.791986 | 0.934 | 0.566 | 0        | 2 | 0.634626 |
| CEP85L   | 0        | 0.278427 | 0.378 | 0.158 | 0        | 2 | 0.199176 |
| CERS6    | 0        | 0.278011 | 0.476 | 0.24  | 0        | 2 | 0.283856 |
| CFAP298  | 0        | 0.922267 | 0.834 | 0.619 | 0        | 2 | 0.658719 |
| CFL1     | 0        | 0.44798  | 0.998 | 0.995 | 0        | 2 | 0.995274 |
| CHD3     | 0        | 0.826925 | 0.93  | 0.674 | 0        | 2 | 0.721545 |
| CHGA     | 0        | 0.416573 | 0.372 | 0.031 | 0        | 2 | 0.093955 |
| CHGB     | 0        | 0.292323 | 0.417 | 0.072 | 0        | 2 | 0.136314 |
| CHMP5    | 0        | 0.281686 | 0.872 | 0.76  | 0        | 2 | 0.781067 |
| CHST8    | 0        | 0.638817 | 0.544 | 0.059 | 0        | 2 | 0.148573 |
| CITED2   | 5E-264   | 0.299237 | 0.515 | 0.31  | 1.7E-259 | 2 | 0.348069 |
| CLASP2   | 0        | 0.394803 | 0.609 | 0.276 | 0        | 2 | 0.338119 |
| CLIP1    | 0        | 0.319668 | 0.593 | 0.353 | 0        | 2 | 0.397072 |
| CLIP3    | 4.8E-256 | 0.255095 | 0.593 | 0.4   | 1.6E-251 | 2 | 0.436019 |
| CLTB     | 0        | 0.558963 | 0.867 | 0.599 | 0        | 2 | 0.648449 |

|         |          |          |       |       |          |   |          |
|---------|----------|----------|-------|-------|----------|---|----------|
| CLTC    | 3.9E-223 | 0.259738 | 0.686 | 0.544 | 1.3E-218 | 2 | 0.570555 |
| CLVS1   | 0        | 0.272695 | 0.323 | 0.062 | 0        | 2 | 0.110622 |
| CMIP    | 0        | 0.395096 | 0.658 | 0.338 | 0        | 2 | 0.39725  |
| CNIH2   | 0        | 1.046434 | 0.961 | 0.668 | 0        | 2 | 0.721936 |
| CNKSR2  | 0        | 0.264772 | 0.334 | 0.092 | 0        | 2 | 0.136953 |
| CNR1    | 0        | 0.397962 | 0.407 | 0.033 | 0        | 2 | 0.102413 |
| CNTN2   | 0        | 0.826626 | 0.508 | 0.055 | 0        | 2 | 0.138766 |
| CNTNAP2 | 0        | 0.91419  | 0.812 | 0.644 | 0        | 2 | 0.675171 |
| CORO1A  | 0        | 0.296049 | 0.507 | 0.244 | 0        | 2 | 0.292385 |
| CORO1C  | 0        | 0.282295 | 0.549 | 0.311 | 0        | 2 | 0.354927 |
| CORO2B  | 0        | 0.724578 | 0.686 | 0.109 | 0        | 2 | 0.2157   |
| COTL1   | 0        | 0.579466 | 0.831 | 0.46  | 0        | 2 | 0.528482 |
| COX5A   | 0        | 0.267841 | 0.98  | 0.964 | 0        | 2 | 0.966739 |
| COX5B   | 0        | 0.253596 | 0.983 | 0.974 | 0        | 2 | 0.975374 |
| COX6A1  | 0        | 0.320043 | 0.989 | 0.977 | 0        | 2 | 0.979532 |
| COX6B1  | 0        | 0.35772  | 0.988 | 0.972 | 0        | 2 | 0.974734 |
| COX6C   | 0        | 0.383067 | 0.991 | 0.978 | 0        | 2 | 0.979994 |
| COX7A2  | 0        | 0.615883 | 0.994 | 0.976 | 0        | 2 | 0.97939  |
| COX7B   | 0        | 0.376455 | 0.969 | 0.93  | 0        | 2 | 0.937351 |
| CPE     | 0        | 0.697196 | 0.983 | 0.859 | 0        | 2 | 0.882165 |
| CPEB4   | 0        | 0.320869 | 0.455 | 0.131 | 0        | 2 | 0.190825 |
| CPLX2   | 0        | 0.457137 | 0.41  | 0.051 | 0        | 2 | 0.117124 |
| CRABP1  | 0        | 0.793645 | 0.353 | 0.074 | 0        | 2 | 0.125262 |
| CREG2   | 0        | 0.296858 | 0.268 | 0.039 | 0        | 2 | 0.081767 |
| CRIP2   | 0        | 0.530116 | 0.824 | 0.535 | 0        | 2 | 0.588821 |
| CRMP1   | 0        | 0.920773 | 0.992 | 0.862 | 0        | 2 | 0.885967 |
| CSNK1E  | 0        | 0.300464 | 0.774 | 0.603 | 0        | 2 | 0.634945 |
| CSRNP3  | 0        | 0.354584 | 0.545 | 0.226 | 0        | 2 | 0.284993 |
| CSRNP2  | 0        | 1.058377 | 0.857 | 0.807 | 0        | 2 | 0.816211 |
| CTNND2  | 0        | 0.35833  | 0.589 | 0.325 | 0        | 2 | 0.373796 |
| CTTNBP2 | 0        | 0.908058 | 0.717 | 0.202 | 0        | 2 | 0.297715 |
| CTXN1   | 0        | 0.41921  | 0.915 | 0.822 | 0        | 2 | 0.839416 |
| CXADR   | 0        | 0.589186 | 0.9   | 0.585 | 0        | 2 | 0.643261 |
| CXXC5   | 4.5E-110 | 0.277814 | 0.69  | 0.62  | 1.5E-105 | 2 | 0.633275 |
| CYCS    | 0        | 0.410784 | 0.943 | 0.867 | 0        | 2 | 0.881312 |
| CYFIP2  | 0        | 0.290235 | 0.582 | 0.355 | 0        | 2 | 0.396681 |
| DACH2   | 0        | 0.3096   | 0.371 | 0.063 | 0        | 2 | 0.1205   |
| DBN1    | 0        | 0.548239 | 0.973 | 0.884 | 0        | 2 | 0.90011  |
| DCC     | 0        | 0.65498  | 0.633 | 0.037 | 0        | 2 | 0.147578 |
| DCHS1   | 5.2E-277 | 0.265203 | 0.515 | 0.308 | 1.8E-272 | 2 | 0.346008 |
| DCLK1   | 0        | 0.260254 | 0.496 | 0.257 | 0        | 2 | 0.301304 |
| DCTN1   | 1.6E-272 | 0.266047 | 0.604 | 0.41  | 5.3E-268 | 2 | 0.44604  |
| DCTN2   | 0        | 0.297664 | 0.948 | 0.894 | 0        | 2 | 0.90377  |
| DCTN3   | 0        | 0.457566 | 0.957 | 0.864 | 0        | 2 | 0.880779 |
| DCTN6   | 6E-263   | 0.271451 | 0.713 | 0.559 | 2E-258   | 2 | 0.587577 |
| DCX     | 0        | 1.245942 | 0.989 | 0.427 | 0        | 2 | 0.53136  |
| DDAH2   | 0        | 0.760568 | 0.983 | 0.889 | 0        | 2 | 0.906755 |
| DDX24   | 1.9E-256 | 0.260288 | 0.904 | 0.847 | 6.5E-252 | 2 | 0.857361 |



|          |          |          |       |       |          |   |          |
|----------|----------|----------|-------|-------|----------|---|----------|
| DDX5     | 0        | 0.358819 | 0.997 | 0.989 | 0        | 2 | 0.990441 |
| DHPS     | 0        | 0.366883 | 0.88  | 0.728 | 0        | 2 | 0.756512 |
| DISP2    | 0        | 0.372611 | 0.402 | 0.041 | 0        | 2 | 0.107921 |
| DISP3    | 0        | 0.281549 | 0.322 | 0.064 | 0        | 2 | 0.112043 |
| DLG4     | 0        | 0.373196 | 0.523 | 0.191 | 0        | 2 | 0.252621 |
| DLGAP4   | 0        | 0.390304 | 0.797 | 0.57  | 0        | 2 | 0.611812 |
| DLL3     | 0        | 0.834077 | 0.692 | 0.18  | 0        | 2 | 0.274795 |
| DMTN     | 0        | 0.354822 | 0.404 | 0.043 | 0        | 2 | 0.109804 |
| DNAJA1   | 0        | 0.330541 | 0.991 | 0.97  | 0        | 2 | 0.974024 |
| DNAJB6   | 0        | 0.414223 | 0.95  | 0.856 | 0        | 2 | 0.873814 |
| DNER     | 3.5E-271 | 0.318111 | 0.726 | 0.561 | 1.2E-266 | 2 | 0.591663 |
| DPF1     | 3.1E-281 | 0.325114 | 0.607 | 0.417 | 1E-276   | 2 | 0.452081 |
| DPYSL2   | 0        | 0.441687 | 0.944 | 0.848 | 0        | 2 | 0.865499 |
| DPYSL3   | 0        | 0.543616 | 0.914 | 0.668 | 0        | 2 | 0.713443 |
| DRAXIN   | 0        | 0.541352 | 0.804 | 0.483 | 0        | 2 | 0.542767 |
| DST      | 0        | 0.452125 | 0.729 | 0.409 | 0        | 2 | 0.468107 |
| DSTN     | 0        | 0.658833 | 0.981 | 0.948 | 0        | 2 | 0.95455  |
| DTD1     | 0        | 0.487656 | 0.958 | 0.843 | 0        | 2 | 0.864646 |
| DUSP26   | 0        | 0.292006 | 0.412 | 0.091 | 0        | 2 | 0.150705 |
| DUSP4    | 4.8E-291 | 0.264411 | 0.358 | 0.151 | 1.6E-286 | 2 | 0.189439 |
| DYNC1H1  | 0        | 0.564558 | 0.953 | 0.803 | 0        | 2 | 0.830567 |
| DYNC1I2  | 0        | 0.495968 | 0.944 | 0.795 | 0        | 2 | 0.822892 |
| DYNC1LI1 | 0        | 0.301327 | 0.765 | 0.607 | 0        | 2 | 0.63658  |
| DYNLL1   | 0        | 0.53285  | 0.995 | 0.984 | 0        | 2 | 0.985608 |
| DYNLRB1  | 0        | 0.488302 | 0.967 | 0.882 | 0        | 2 | 0.897871 |
| DYNLT1   | 0        | 0.430244 | 0.986 | 0.942 | 0        | 2 | 0.950108 |
| EBF2     | 0        | 0.451113 | 0.297 | 0.038 | 0        | 2 | 0.085747 |
| EBP      | 0        | 0.391571 | 0.83  | 0.686 | 0        | 2 | 0.712626 |
| EDIL3    | 0        | 0.37337  | 0.347 | 0.026 | 0        | 2 | 0.085391 |
| EEF1A2   | 0        | 0.61936  | 0.832 | 0.586 | 0        | 2 | 0.631356 |
| EIF4A2   | 0        | 0.437689 | 0.959 | 0.872 | 0        | 2 | 0.88849  |
| EIF4G2   | 0        | 0.373758 | 0.98  | 0.94  | 0        | 2 | 0.947194 |
| ELAVL2   | 0        | 0.431786 | 0.486 | 0.224 | 0        | 2 | 0.272236 |
| ELAVL3   | 0        | 0.869003 | 0.978 | 0.67  | 0        | 2 | 0.727302 |
| ELAVL4   | 0        | 1.12878  | 0.952 | 0.272 | 0        | 2 | 0.398245 |
| EMX1     | 0        | 0.48381  | 0.905 | 0.737 | 0        | 2 | 0.767954 |
| ENC1     | 0        | 1.165972 | 0.801 | 0.415 | 0        | 2 | 0.486266 |
| ENDOG    | 0        | 0.318916 | 0.645 | 0.408 | 0        | 2 | 0.451476 |
| ENO2     | 0        | 0.592232 | 0.838 | 0.513 | 0        | 2 | 0.573149 |
| EPB41L3  | 0        | 0.544707 | 0.631 | 0.225 | 0        | 2 | 0.300629 |
| EPHA5    | 0        | 0.375229 | 0.41  | 0.097 | 0        | 2 | 0.155005 |
| EPHA7    | 0        | 0.366899 | 0.398 | 0.078 | 0        | 2 | 0.137771 |
| ERC1     | 1.7E-271 | 0.293548 | 0.543 | 0.345 | 5.7E-267 | 2 | 0.381969 |
| ERG28    | 1.4E-222 | 0.286801 | 0.833 | 0.763 | 4.9E-218 | 2 | 0.775594 |
| ETFB     | 0        | 0.371001 | 0.866 | 0.738 | 0        | 2 | 0.76138  |
| EVL      | 0        | 0.685648 | 0.981 | 0.878 | 0        | 2 | 0.896805 |
| FAM177A1 | 0        | 0.340738 | 0.715 | 0.474 | 0        | 2 | 0.518354 |
| FAM19A5  | 0        | 0.306199 | 0.548 | 0.311 | 0        | 2 | 0.355318 |

|           |          |          |       |       |          |   |          |
|-----------|----------|----------|-------|-------|----------|---|----------|
| FAM200B   | 5.7E-226 | 0.254879 | 0.786 | 0.669 | 1.9E-221 | 2 | 0.690452 |
| FAM241B   | 0        | 0.262306 | 0.479 | 0.229 | 0        | 2 | 0.275505 |
| FAM49A    | 0        | 0.373306 | 0.414 | 0.112 | 0        | 2 | 0.167833 |
| FAM57B    | 0        | 0.548495 | 0.77  | 0.334 | 0        | 2 | 0.414626 |
| FAM89B    | 0        | 0.704782 | 0.96  | 0.772 | 0        | 2 | 0.806617 |
| FAM96B    | 0        | 0.568234 | 0.968 | 0.878 | 0        | 2 | 0.89478  |
| FAT4      | 2.2E-227 | 0.256226 | 0.45  | 0.265 | 7.4E-223 | 2 | 0.299136 |
| FDFT1     | 0        | 0.314907 | 0.982 | 0.933 | 0        | 2 | 0.942042 |
| FEZ1      | 0        | 0.689662 | 0.976 | 0.925 | 0        | 2 | 0.934686 |
| FEZF2     | 6E-278   | 0.341124 | 0.874 | 0.769 | 2E-273   | 2 | 0.788494 |
| FIBP      | 4.9E-300 | 0.303976 | 0.882 | 0.812 | 1.6E-295 | 2 | 0.824846 |
| FKBP1A    | 0        | 0.354736 | 0.947 | 0.886 | 0        | 2 | 0.897267 |
| FLRT2     | 0        | 0.254723 | 0.243 | 0.039 | 0        | 2 | 0.077112 |
| FNBP1L    | 0        | 0.552909 | 0.945 | 0.773 | 0        | 2 | 0.804627 |
| FNDC5     | 0        | 0.616566 | 0.468 | 0.131 | 0        | 2 | 0.193419 |
| FOXG1     | 0        | 0.387017 | 0.906 | 0.768 | 0        | 2 | 0.793291 |
| FOXO6     | 0        | 0.311773 | 0.388 | 0.092 | 0        | 2 | 0.147081 |
| FRMD4B    | 1.9E-150 | 0.27955  | 0.37  | 0.229 | 6.5E-146 | 2 | 0.255535 |
| FSD1      | 3.7E-286 | 0.290146 | 0.742 | 0.594 | 1.2E-281 | 2 | 0.621193 |
| FSTL5     | 0        | 0.413029 | 0.403 | 0.057 | 0        | 2 | 0.120962 |
| FXVD6     | 0        | 0.450278 | 0.966 | 0.923 | 0        | 2 | 0.931026 |
| FXVD7     | 0        | 0.393538 | 0.415 | 0.087 | 0        | 2 | 0.147578 |
| FYN       | 0        | 0.531875 | 0.924 | 0.778 | 0        | 2 | 0.805408 |
| G3BP2     | 0        | 0.315341 | 0.86  | 0.749 | 0        | 2 | 0.76998  |
| GABARAPL1 | 0        | 0.334791 | 0.519 | 0.221 | 0        | 2 | 0.27579  |
| GABARAPL2 | 0        | 0.628575 | 0.987 | 0.915 | 0        | 2 | 0.928112 |
| GABRB3    | 0        | 0.355713 | 0.515 | 0.145 | 0        | 2 | 0.213425 |
| GADD45A   | 7.2E-196 | 0.305081 | 0.451 | 0.274 | 2.4E-191 | 2 | 0.306706 |
| GADD45G   | 0        | 0.567419 | 0.626 | 0.144 | 0        | 2 | 0.233396 |
| GALNT17   | 0        | 0.253107 | 0.279 | 0.022 | 0        | 2 | 0.070005 |
| GAP43     | 0        | 1.313645 | 0.962 | 0.724 | 0        | 2 | 0.768416 |
| GDAP1L1   | 0        | 0.688126 | 0.775 | 0.226 | 0        | 2 | 0.327814 |
| GDI1      | 0        | 0.722847 | 0.898 | 0.485 | 0        | 2 | 0.561352 |
| GLRX      | 0        | 0.654256 | 0.68  | 0.151 | 0        | 2 | 0.24928  |
| GNAI1     | 0        | 0.298217 | 0.502 | 0.273 | 0        | 2 | 0.315092 |
| GNAO1     | 0        | 0.432265 | 0.644 | 0.369 | 0        | 2 | 0.419672 |
| GNAS      | 0        | 0.332935 | 1     | 0.998 | 0        | 2 | 0.998365 |
| GNB1      | 0        | 0.389342 | 0.899 | 0.757 | 0        | 2 | 0.783341 |
| GNG2      | 0        | 0.458509 | 0.644 | 0.211 | 0        | 2 | 0.290786 |
| GNG3      | 0        | 0.571304 | 0.711 | 0.278 | 0        | 2 | 0.357876 |
| GNG4      | 4.1E-230 | 0.2694   | 0.693 | 0.538 | 1.4E-225 | 2 | 0.566433 |
| GNG8      | 0        | 0.33509  | 0.308 | 0.022 | 0        | 2 | 0.074553 |
| GPC2      | 0        | 0.7245   | 0.869 | 0.417 | 0        | 2 | 0.50048  |
| GPM6A     | 0        | 1.43074  | 0.988 | 0.626 | 0        | 2 | 0.693152 |
| GPR162    | 0        | 0.301086 | 0.444 | 0.154 | 0        | 2 | 0.207988 |
| GRB2      | 0        | 0.489101 | 0.835 | 0.563 | 0        | 2 | 0.613411 |
| GRIA1     | 0        | 0.42887  | 0.421 | 0.163 | 0        | 2 | 0.210973 |
| GRIA2     | 0        | 0.677345 | 0.565 | 0.082 | 0        | 2 | 0.171138 |

|          |          |          |       |       |          |   |          |
|----------|----------|----------|-------|-------|----------|---|----------|
| GRIA3    | 0        | 0.378063 | 0.421 | 0.095 | 0        | 2 | 0.155716 |
| GRIK5    | 3.6E-303 | 0.250244 | 0.435 | 0.216 | 1.2E-298 | 2 | 0.256174 |
| GSE1     | 0        | 0.367584 | 0.565 | 0.288 | 0        | 2 | 0.338972 |
| GSK3B    | 0        | 0.381107 | 0.743 | 0.491 | 0        | 2 | 0.537436 |
| GSTA4    | 0        | 0.711585 | 0.974 | 0.841 | 0        | 2 | 0.865819 |
| GTF2A2   | 0        | 0.260518 | 0.941 | 0.875 | 0        | 2 | 0.887531 |
| GTF2I    | 0        | 0.29201  | 0.98  | 0.951 | 0        | 2 | 0.956149 |
| GUK1     | 0        | 0.482147 | 0.966 | 0.884 | 0        | 2 | 0.899577 |
| H3F3A    | 0        | 0.28018  | 0.999 | 0.999 | 0        | 2 | 0.999076 |
| H3F3B    | 0        | 0.541136 | 0.999 | 0.995 | 0        | 2 | 0.995594 |
| HAGH     | 0        | 0.467958 | 0.849 | 0.579 | 0        | 2 | 0.629295 |
| HCFC1R1  | 0        | 0.394833 | 0.662 | 0.39  | 0        | 2 | 0.440176 |
| HDAC2    | 0        | 0.276134 | 0.974 | 0.935 | 0        | 2 | 0.94222  |
| HDAC5    | 0        | 0.330285 | 0.613 | 0.349 | 0        | 2 | 0.39764  |
| HDGFL3   | 2E-263   | 0.262963 | 0.847 | 0.741 | 6.8E-259 | 2 | 0.760456 |
| HECTD4   | 0        | 0.375906 | 0.564 | 0.233 | 0        | 2 | 0.294268 |
| HERC1    | 0        | 0.358131 | 0.622 | 0.33  | 0        | 2 | 0.384386 |
| HES6     | 0        | 0.380253 | 0.96  | 0.871 | 0        | 2 | 0.887246 |
| HMGCR    | 0        | 0.446033 | 0.893 | 0.726 | 0        | 2 | 0.756938 |
| HMGCS1   | 0        | 0.395373 | 0.954 | 0.889 | 0        | 2 | 0.900785 |
| HPCA     | 0        | 0.489725 | 0.395 | 0.079 | 0        | 2 | 0.137415 |
| HPCAL1   | 0        | 0.664269 | 0.726 | 0.299 | 0        | 2 | 0.377954 |
| HRAS     | 0        | 0.351472 | 0.881 | 0.753 | 0        | 2 | 0.776731 |
| HS6ST1   | 0        | 0.281712 | 0.383 | 0.141 | 0        | 2 | 0.185885 |
| HSD11B1L | 8.2E-274 | 0.268573 | 0.61  | 0.407 | 2.8E-269 | 2 | 0.444298 |
| HSDL1    | 0        | 0.294479 | 0.61  | 0.37  | 0        | 2 | 0.414555 |
| ID2      | 1.4E-168 | 0.285939 | 0.491 | 0.322 | 4.5E-164 | 2 | 0.353221 |
| IDH1     | 0        | 0.407352 | 0.869 | 0.696 | 0        | 2 | 0.728368 |
| IDS      | 0        | 0.459242 | 0.634 | 0.281 | 0        | 2 | 0.346327 |
| IGDCC3   | 0        | 0.425843 | 0.533 | 0.235 | 0        | 2 | 0.290501 |
| IGFBPL1  | 0        | 0.513283 | 0.584 | 0.145 | 0        | 2 | 0.226467 |
| IGLON5   | 0        | 0.272413 | 0.504 | 0.275 | 0        | 2 | 0.317402 |
| IGSF21   | 0        | 0.487585 | 0.655 | 0.32  | 0        | 2 | 0.382005 |
| INA      | 0        | 0.758471 | 0.888 | 0.325 | 0        | 2 | 0.429231 |
| INSM1    | 0        | 0.481364 | 0.468 | 0.075 | 0        | 2 | 0.147898 |
| IRF2BPL  | 4.7E-222 | 0.253211 | 0.559 | 0.38  | 1.6E-217 | 2 | 0.413063 |
| IRGQ     | 0        | 0.2803   | 0.494 | 0.238 | 0        | 2 | 0.285491 |
| ISLR2    | 0        | 0.503663 | 0.519 | 0.073 | 0        | 2 | 0.155254 |
| JAKMIP2  | 0        | 0.491984 | 0.799 | 0.513 | 0        | 2 | 0.566433 |
| JPH4     | 0        | 0.575277 | 0.663 | 0.313 | 0        | 2 | 0.378203 |
| JPT1     | 0        | 0.53924  | 0.997 | 0.984 | 0        | 2 | 0.986745 |
| KALRN    | 0        | 0.25182  | 0.426 | 0.187 | 0        | 2 | 0.231157 |
| KAT6B    | 0        | 0.37193  | 0.786 | 0.613 | 0        | 2 | 0.645322 |
| KCNMB4   | 0        | 0.299092 | 0.505 | 0.254 | 0        | 2 | 0.300416 |
| KCNQ1OT1 | 0        | 0.567411 | 0.765 | 0.401 | 0        | 2 | 0.468356 |
| KCNQ3    | 0        | 0.280689 | 0.395 | 0.145 | 0        | 2 | 0.191322 |
| KDM5B    | 0        | 0.473048 | 0.912 | 0.718 | 0        | 2 | 0.754167 |
| KDM6B    | 0        | 0.519017 | 0.694 | 0.277 | 0        | 2 | 0.354465 |

|           |          |          |       |       |          |   |          |
|-----------|----------|----------|-------|-------|----------|---|----------|
| KHDRBS3   | 0        | 0.776406 | 0.703 | 0.307 | 0        | 2 | 0.380086 |
| KIDINS220 | 0        | 0.934199 | 0.925 | 0.499 | 0        | 2 | 0.577876 |
| KIF1A     | 0        | 0.617473 | 0.917 | 0.685 | 0        | 2 | 0.728297 |
| KIF1B     | 0        | 0.305319 | 0.881 | 0.784 | 0        | 2 | 0.802352 |
| KIF21B    | 0        | 0.373592 | 0.457 | 0.075 | 0        | 2 | 0.145695 |
| KIF3A     | 0        | 0.656076 | 0.877 | 0.527 | 0        | 2 | 0.591806 |
| KIF3B     | 0        | 0.299687 | 0.509 | 0.256 | 0        | 2 | 0.302654 |
| KIF3C     | 0        | 0.456273 | 0.609 | 0.198 | 0        | 2 | 0.273871 |
| KIF5A     | 0        | 0.399935 | 0.61  | 0.24  | 0        | 2 | 0.308802 |
| KIF5C     | 0        | 1.325745 | 0.988 | 0.554 | 0        | 2 | 0.634093 |
| KIFAP3    | 0        | 0.633697 | 0.802 | 0.399 | 0        | 2 | 0.473544 |
| KLC1      | 0        | 0.609382 | 0.866 | 0.49  | 0        | 2 | 0.559397 |
| KLF13     | 2.2E-181 | 0.257281 | 0.595 | 0.45  | 7.3E-177 | 2 | 0.477062 |
| KLF7      | 0        | 0.445443 | 0.573 | 0.153 | 0        | 2 | 0.231086 |
| KLHL24    | 0        | 0.384554 | 0.586 | 0.281 | 0        | 2 | 0.337373 |
| KLHL35    | 0        | 0.83265  | 0.555 | 0.056 | 0        | 2 | 0.148182 |
| KMT2E     | 0        | 0.343796 | 0.912 | 0.798 | 0        | 2 | 0.819232 |
| L1CAM     | 0        | 0.415608 | 0.513 | 0.07  | 0        | 2 | 0.151914 |
| LBH       | 0        | 0.433971 | 0.612 | 0.271 | 0        | 2 | 0.334565 |
| LCOR      | 0        | 0.310476 | 0.667 | 0.463 | 0        | 2 | 0.501084 |
| LCORL     | 1.2E-191 | 0.266936 | 0.553 | 0.399 | 4E-187   | 2 | 0.427774 |
| LDOC1     | 8.1E-261 | 0.271523 | 0.61  | 0.417 | 2.7E-256 | 2 | 0.452436 |
| LHFPL6    | 7.7E-300 | 0.276296 | 0.327 | 0.122 | 2.6E-295 | 2 | 0.15998  |
| LINC01122 | 0        | 0.256081 | 0.349 | 0.086 | 0        | 2 | 0.134928 |
| LINGO1    | 0        | 0.434746 | 0.526 | 0.126 | 0        | 2 | 0.200171 |
| LMBR1L    | 0        | 0.295019 | 0.523 | 0.268 | 0        | 2 | 0.315376 |
| LMO3      | 1.5E-09  | 0.556767 | 0.152 | 0.132 | 5.02E-05 | 2 | 0.135638 |
| LMO4      | 0        | 0.693427 | 0.712 | 0.409 | 0        | 2 | 0.465406 |
| LRCH2     | 0        | 0.384096 | 0.58  | 0.246 | 0        | 2 | 0.30802  |
| LRP1      | 0        | 0.29198  | 0.567 | 0.32  | 0        | 2 | 0.366085 |
| LY6H      | 0        | 0.499307 | 0.717 | 0.491 | 0        | 2 | 0.532959 |
| LZTS1     | 0        | 0.551703 | 0.531 | 0.075 | 0        | 2 | 0.159056 |
| MACF1     | 2.3E-287 | 0.30259  | 0.806 | 0.676 | 7.6E-283 | 2 | 0.699691 |
| MACO1     | 0        | 0.436793 | 0.68  | 0.327 | 0        | 2 | 0.39231  |
| MANEAL    | 0        | 0.270252 | 0.373 | 0.091 | 0        | 2 | 0.143456 |
| MAP1A     | 0        | 0.547663 | 0.74  | 0.387 | 0        | 2 | 0.452649 |
| MAP1B     | 0        | 0.559302 | 1     | 0.996 | 0        | 2 | 0.996304 |
| MAP1LC3A  | 0        | 0.814824 | 0.927 | 0.556 | 0        | 2 | 0.62464  |
| MAP1LC3B  | 0        | 0.539027 | 0.928 | 0.744 | 0        | 2 | 0.777975 |
| MAP2      | 0        | 1.082401 | 0.991 | 0.712 | 0        | 2 | 0.763903 |
| MAP4K4    | 0        | 0.796996 | 0.955 | 0.756 | 0        | 2 | 0.793184 |
| MAP6      | 0        | 0.553091 | 0.818 | 0.456 | 0        | 2 | 0.52276  |
| MAP7D1    | 0        | 0.311639 | 0.67  | 0.442 | 0        | 2 | 0.484098 |
| MAPK6     | 0        | 0.337483 | 0.648 | 0.397 | 0        | 2 | 0.443339 |
| MAPK8     | 0        | 0.505122 | 0.734 | 0.346 | 0        | 2 | 0.417647 |
| MAPK8IP2  | 0        | 0.346843 | 0.575 | 0.25  | 0        | 2 | 0.309797 |
| MAPRE3    | 0        | 0.45239  | 0.665 | 0.273 | 0        | 2 | 0.345368 |
| MAPT      | 0        | 0.758257 | 0.788 | 0.161 | 0        | 2 | 0.277069 |

|          |          |          |       |       |          |   |          |
|----------|----------|----------|-------|-------|----------|---|----------|
| MARCKSL1 | 0        | 0.527193 | 0.999 | 0.996 | 0        | 2 | 0.99666  |
| MCTS1    | 0        | 0.412835 | 0.818 | 0.619 | 0        | 2 | 0.655876 |
| MEAF6    | 0        | 0.308086 | 0.895 | 0.807 | 0        | 2 | 0.823176 |
| MEIS3    | 0        | 0.52922  | 0.831 | 0.52  | 0        | 2 | 0.578089 |
| MEX3A    | 1.5E-254 | 0.282775 | 0.88  | 0.771 | 5E-250   | 2 | 0.790946 |
| MFAP4    | 0        | 0.461713 | 0.404 | 0.077 | 0        | 2 | 0.137344 |
| MGST3    | 0        | 0.52584  | 0.976 | 0.921 | 0        | 2 | 0.930919 |
| MIAT     | 0        | 0.600697 | 0.756 | 0.29  | 0        | 2 | 0.376035 |
| MIEN1    | 0        | 0.587158 | 0.86  | 0.54  | 0        | 2 | 0.599232 |
| MLLT11   | 0        | 1.480494 | 0.996 | 0.801 | 0        | 2 | 0.836751 |
| MLLT3    | 5.1E-298 | 0.303298 | 0.468 | 0.252 | 1.7E-293 | 2 | 0.291603 |
| MPC1     | 1.1E-286 | 0.285628 | 0.653 | 0.469 | 3.6E-282 | 2 | 0.503109 |
| MPC2     | 7.2E-300 | 0.310597 | 0.863 | 0.803 | 2.4E-295 | 2 | 0.814044 |
| MPP3     | 0        | 0.280972 | 0.402 | 0.121 | 0        | 2 | 0.173057 |
| MRPL41   | 0        | 0.323812 | 0.928 | 0.86  | 0        | 2 | 0.872535 |
| MRPS36   | 0        | 0.294108 | 0.754 | 0.587 | 0        | 2 | 0.618031 |
| MRPS6    | 2.4E-128 | 0.283278 | 0.911 | 0.895 | 8E-124   | 2 | 0.897694 |
| MSMO1    | 0        | 0.37171  | 0.969 | 0.918 | 0        | 2 | 0.92765  |
| MT-ND2   | 0        | 0.283126 | 0.992 | 0.98  | 0        | 2 | 0.982339 |
| MTCH2    | 4.2E-248 | 0.257825 | 0.821 | 0.721 | 1.4E-243 | 2 | 0.739668 |
| MTMR4    | 0        | 0.286847 | 0.63  | 0.418 | 0        | 2 | 0.456878 |
| MTSS1    | 0        | 0.319129 | 0.539 | 0.256 | 0        | 2 | 0.308695 |
| MVD      | 0        | 0.613433 | 0.925 | 0.748 | 0        | 2 | 0.780605 |
| MXD4     | 0        | 0.439021 | 0.761 | 0.463 | 0        | 2 | 0.517821 |
| MYCBP2   | 0        | 0.339631 | 0.71  | 0.5   | 0        | 2 | 0.538787 |
| MYL12B   | 0        | 0.356203 | 0.967 | 0.913 | 0        | 2 | 0.922675 |
| MYO6     | 0        | 0.627247 | 0.742 | 0.393 | 0        | 2 | 0.457944 |
| MYT1     | 0        | 0.381403 | 0.414 | 0.048 | 0        | 2 | 0.115739 |
| MYT1L    | 0        | 0.659367 | 0.67  | 0.07  | 0        | 2 | 0.180946 |
| NAPA     | 5.1E-293 | 0.271773 | 0.577 | 0.367 | 1.7E-288 | 2 | 0.405814 |
| NARF     | 0        | 0.325644 | 0.83  | 0.685 | 0        | 2 | 0.711418 |
| NAV1     | 0        | 0.632284 | 0.806 | 0.448 | 0        | 2 | 0.5148   |
| NBEA     | 0        | 0.617901 | 0.689 | 0.239 | 0        | 2 | 0.322839 |
| NCAM1    | 0        | 0.514983 | 0.855 | 0.605 | 0        | 2 | 0.651114 |
| NCAM2    | 0        | 0.363689 | 0.36  | 0.039 | 0        | 2 | 0.098362 |
| NCAN     | 0        | 0.491088 | 0.685 | 0.332 | 0        | 2 | 0.397463 |
| NCS1     | 0        | 0.453648 | 0.675 | 0.346 | 0        | 2 | 0.40656  |
| NDFIP1   | 0        | 0.531762 | 0.897 | 0.719 | 0        | 2 | 0.752105 |
| NDST3    | 0        | 0.264753 | 0.26  | 0.022 | 0        | 2 | 0.066238 |
| NDUFA1   | 5.9E-284 | 0.26304  | 0.946 | 0.911 | 2E-279   | 2 | 0.917736 |
| NDUFA5   | 0        | 0.577325 | 0.96  | 0.86  | 0        | 2 | 0.87854  |
| NDUFA8   | 0        | 0.281367 | 0.888 | 0.802 | 0        | 2 | 0.81781  |
| NDUFB10  | 0        | 0.358374 | 0.979 | 0.955 | 0        | 2 | 0.959454 |
| NDUFB11  | 0        | 0.291058 | 0.99  | 0.977 | 0        | 2 | 0.979496 |
| NDUFB8   | 0        | 0.525741 | 0.97  | 0.922 | 0        | 2 | 0.931061 |
| NDUFS5   | 0        | 0.293743 | 0.994 | 0.986 | 0        | 2 | 0.987101 |
| NDUFS7   | 1.3E-242 | 0.258383 | 0.843 | 0.757 | 4.4E-238 | 2 | 0.773249 |
| NECAP1   | 0        | 0.281637 | 0.515 | 0.245 | 0        | 2 | 0.294624 |

|          |          |          |       |       |          |   |          |
|----------|----------|----------|-------|-------|----------|---|----------|
| NEFM     | 0        | 0.385781 | 0.431 | 0.057 | 0        | 2 | 0.126222 |
| NELL2    | 0        | 0.80992  | 0.821 | 0.31  | 0        | 2 | 0.404996 |
| NEO1     | 5.8E-251 | 0.296443 | 0.45  | 0.257 | 1.9E-246 | 2 | 0.292562 |
| NEUROD1  | 0        | 0.532931 | 0.458 | 0.038 | 0        | 2 | 0.115419 |
| NEUROD2  | 0        | 1.517517 | 0.87  | 0.037 | 0        | 2 | 0.19118  |
| NEUROD6  | 0        | 2.298943 | 0.955 | 0.081 | 0        | 2 | 0.243275 |
| NFASC    | 0        | 0.585811 | 0.673 | 0.152 | 0        | 2 | 0.248214 |
| NFIA     | 0        | 1.329328 | 0.99  | 0.829 | 0        | 2 | 0.858783 |
| NFIB     | 0        | 1.299962 | 0.986 | 0.833 | 0        | 2 | 0.861483 |
| NHLH1    | 0        | 1.39804  | 0.613 | 0.079 | 0        | 2 | 0.177748 |
| NHLH2    | 0        | 0.494831 | 0.407 | 0.026 | 0        | 2 | 0.096265 |
| NKAIN1   | 0        | 0.351767 | 0.592 | 0.31  | 0        | 2 | 0.362389 |
| NLRP1    | 0        | 0.384579 | 0.861 | 0.666 | 0        | 2 | 0.701858 |
| NMNAT2   | 0        | 0.313538 | 0.399 | 0.074 | 0        | 2 | 0.134039 |
| NNAT     | 0        | 1.240902 | 0.976 | 0.592 | 0        | 2 | 0.662805 |
| NOL4     | 0        | 0.519792 | 0.535 | 0.103 | 0        | 2 | 0.183043 |
| NOVA2    | 0        | 0.376174 | 0.661 | 0.366 | 0        | 2 | 0.420667 |
| NPDC1    | 0        | 0.38632  | 0.88  | 0.73  | 0        | 2 | 0.757791 |
| NPTX1    | 0        | 0.596743 | 0.512 | 0.026 | 0        | 2 | 0.116129 |
| NPTX2    | 0        | 0.301429 | 0.259 | 0.032 | 0        | 2 | 0.074198 |
| NPTXR    | 0        | 0.42617  | 0.477 | 0.091 | 0        | 2 | 0.162254 |
| NRCAM    | 0        | 0.632446 | 0.649 | 0.113 | 0        | 2 | 0.212146 |
| NREP     | 0        | 0.614525 | 0.987 | 0.895 | 0        | 2 | 0.912405 |
| NRN1     | 0        | 0.693159 | 0.548 | 0.081 | 0        | 2 | 0.16762  |
| NRXN1    | 0        | 1.216995 | 0.932 | 0.251 | 0        | 2 | 0.376888 |
| NRXN2    | 8.7E-282 | 0.27194  | 0.612 | 0.407 | 2.9E-277 | 2 | 0.444902 |
| NSG1     | 0        | 0.73466  | 0.934 | 0.684 | 0        | 2 | 0.730642 |
| NSG2     | 0        | 1.010446 | 0.89  | 0.113 | 0        | 2 | 0.257382 |
| NSMF     | 0        | 0.704112 | 0.785 | 0.333 | 0        | 2 | 0.417007 |
| NTS      | 1E-213   | 0.491743 | 0.132 | 0.03  | 3.4E-209 | 2 | 0.048861 |
| NUDT3    | 0        | 0.455336 | 0.797 | 0.566 | 0        | 2 | 0.608756 |
| NUMBL    | 0        | 0.304272 | 0.448 | 0.161 | 0        | 2 | 0.213994 |
| NUP93    | 0        | 0.37936  | 0.588 | 0.348 | 0        | 2 | 0.39231  |
| NXPH4    | 0        | 0.924725 | 0.71  | 0.074 | 0        | 2 | 0.192069 |
| NYAP2    | 0        | 0.305005 | 0.334 | 0.019 | 0        | 2 | 0.077396 |
| OCIAD2   | 0        | 0.789409 | 0.891 | 0.583 | 0        | 2 | 0.640205 |
| OLFM1    | 0        | 0.652328 | 0.812 | 0.399 | 0        | 2 | 0.475392 |
| OLFM2    | 0        | 0.611135 | 0.765 | 0.301 | 0        | 2 | 0.387335 |
| OPTN     | 0        | 0.412145 | 0.58  | 0.192 | 0        | 2 | 0.264241 |
| PAFAH1B1 | 0        | 0.330885 | 0.866 | 0.757 | 0        | 2 | 0.776909 |
| PAFAH1B3 | 0        | 0.412836 | 0.989 | 0.971 | 0        | 2 | 0.974379 |
| PAK3     | 0        | 0.553848 | 0.842 | 0.453 | 0        | 2 | 0.524715 |
| PAK5     | 0        | 0.395552 | 0.529 | 0.135 | 0        | 2 | 0.20845  |
| PALM     | 1.4E-212 | 0.253954 | 0.711 | 0.58  | 4.8E-208 | 2 | 0.604207 |
| PAPSS1   | 0        | 0.300295 | 0.701 | 0.513 | 0        | 2 | 0.548133 |
| PARP6    | 0        | 0.323254 | 0.475 | 0.154 | 0        | 2 | 0.213852 |
| PBRM1    | 0        | 0.338746 | 0.766 | 0.564 | 0        | 2 | 0.601649 |
| PCBP4    | 0        | 0.37211  | 0.657 | 0.445 | 0        | 2 | 0.483991 |



|          |          |          |       |       |          |   |          |
|----------|----------|----------|-------|-------|----------|---|----------|
| PCDH9    | 0        | 0.891855 | 0.703 | 0.141 | 0        | 2 | 0.245478 |
| PCLO     | 0        | 0.308748 | 0.446 | 0.169 | 0        | 2 | 0.220426 |
| PCMT1    | 0        | 0.348566 | 0.891 | 0.776 | 0        | 2 | 0.79688  |
| PCSK1N   | 0        | 0.985737 | 0.992 | 0.841 | 0        | 2 | 0.869408 |
| PDE1A    | 0        | 0.815526 | 0.671 | 0.093 | 0        | 2 | 0.199709 |
| PDE4DIP  | 0        | 0.293242 | 0.394 | 0.146 | 0        | 2 | 0.192353 |
| PEPD     | 1.3E-307 | 0.353097 | 0.706 | 0.543 | 4.5E-303 | 2 | 0.573114 |
| PFDN2    | 0        | 0.395998 | 0.962 | 0.9   | 0        | 2 | 0.911908 |
| PFKM     | 0        | 0.279803 | 0.56  | 0.335 | 0        | 2 | 0.376746 |
| PGAP1    | 0        | 0.74711  | 0.839 | 0.396 | 0        | 2 | 0.478199 |
| PGM2L1   | 0        | 0.61591  | 0.82  | 0.336 | 0        | 2 | 0.426104 |
| PHF20L1  | 4.3E-303 | 0.322482 | 0.741 | 0.583 | 1.5E-298 | 2 | 0.612665 |
| PHF21B   | 0        | 0.403434 | 0.553 | 0.193 | 0        | 2 | 0.259372 |
| PHYHIP   | 0        | 0.468454 | 0.47  | 0.036 | 0        | 2 | 0.116556 |
| PIK3R3   | 0        | 0.28437  | 0.573 | 0.334 | 0        | 2 | 0.378451 |
| PJA2     | 0        | 0.496154 | 0.784 | 0.546 | 0        | 2 | 0.590206 |
| PLD3     | 0        | 0.32093  | 0.868 | 0.698 | 0        | 2 | 0.729967 |
| PLPPR1   | 0        | 0.392829 | 0.425 | 0.077 | 0        | 2 | 0.141289 |
| PLPPR2   | 0        | 0.519313 | 0.642 | 0.176 | 0        | 2 | 0.262606 |
| PLPPR3   | 0        | 0.548    | 0.961 | 0.843 | 0        | 2 | 0.864895 |
| PLXNA2   | 0        | 0.54389  | 0.537 | 0.1   | 0        | 2 | 0.180839 |
| PLXNA4   | 0        | 0.501666 | 0.458 | 0.032 | 0        | 2 | 0.110728 |
| PNMA1    | 1.5E-293 | 0.284574 | 0.78  | 0.643 | 5.1E-289 | 2 | 0.668455 |
| PNPLA8   | 0        | 0.355423 | 0.615 | 0.318 | 0        | 2 | 0.373334 |
| PODXL2   | 0        | 0.595518 | 0.923 | 0.676 | 0        | 2 | 0.722043 |
| POLR2B   | 5E-237   | 0.260004 | 0.687 | 0.532 | 1.7E-232 | 2 | 0.560712 |
| POU2F2   | 0        | 0.467052 | 0.55  | 0.108 | 0        | 2 | 0.190327 |
| PPFIA2   | 0        | 0.310814 | 0.39  | 0.102 | 0        | 2 | 0.155467 |
| PPP1R14A | 0        | 0.286311 | 0.228 | 0.044 | 0        | 2 | 0.078    |
| PPP1R14B | 0        | 0.514928 | 0.996 | 0.97  | 0        | 2 | 0.975161 |
| PPP1R1A  | 0        | 0.259704 | 0.434 | 0.201 | 0        | 2 | 0.24395  |
| PPP1R1B  | 0        | 0.250595 | 0.212 | 0.019 | 0        | 2 | 0.054476 |
| PPP2R2B  | 0        | 0.687821 | 0.675 | 0.279 | 0        | 2 | 0.352475 |
| PPP2R5B  | 0        | 0.295621 | 0.392 | 0.081 | 0        | 2 | 0.138837 |
| PPP3CA   | 0        | 0.553571 | 0.733 | 0.382 | 0        | 2 | 0.446999 |
| PPP3CB   | 1.2E-264 | 0.25511  | 0.522 | 0.317 | 4E-260   | 2 | 0.354785 |
| PRDM8    | 0        | 0.587291 | 0.447 | 0.027 | 0        | 2 | 0.105185 |
| PRDX1    | 0        | 0.697409 | 0.993 | 0.971 | 0        | 2 | 0.974841 |
| PRDX5    | 0        | 0.399631 | 0.989 | 0.968 | 0        | 2 | 0.972211 |
| PRKACB   | 0        | 0.292236 | 0.463 | 0.227 | 0        | 2 | 0.270921 |
| PRKAR2B  | 0        | 0.47259  | 0.665 | 0.333 | 0        | 2 | 0.394407 |
| PRKCA    | 0        | 0.289453 | 0.389 | 0.166 | 0        | 2 | 0.20774  |
| PRKCZ    | 0        | 0.280358 | 0.449 | 0.186 | 0        | 2 | 0.234782 |
| PRKX     | 0        | 0.569079 | 0.65  | 0.342 | 0        | 2 | 0.398955 |
| PRPSAP2  | 2.4E-296 | 0.288472 | 0.705 | 0.53  | 8.1E-292 | 2 | 0.562418 |
| PRRC2B   | 0        | 0.304717 | 0.828 | 0.706 | 0        | 2 | 0.728546 |
| PSMA7    | 0        | 0.302698 | 0.994 | 0.987 | 0        | 2 | 0.988415 |
| PSMD14   | 0        | 0.554691 | 0.948 | 0.849 | 0        | 2 | 0.867347 |

|         |          |          |       |       |          |   |          |
|---------|----------|----------|-------|-------|----------|---|----------|
| PSMD8   | 0        | 0.267261 | 0.973 | 0.952 | 0        | 2 | 0.955581 |
| PTMS    | 0        | 0.507086 | 0.999 | 0.993 | 0        | 2 | 0.994279 |
| PTPRO   | 0        | 0.294042 | 0.362 | 0.087 | 0        | 2 | 0.137771 |
| PTPRZ1  | 0        | 0.64493  | 0.945 | 0.817 | 0        | 2 | 0.840766 |
| PWAR6   | 0        | 0.279459 | 0.511 | 0.269 | 0        | 2 | 0.31367  |
| RAB18   | 6.4E-275 | 0.268115 | 0.711 | 0.544 | 2.1E-270 | 2 | 0.575282 |
| RAB1A   | 2.5E-248 | 0.254011 | 0.739 | 0.589 | 8.5E-244 | 2 | 0.616432 |
| RAB26   | 0        | 0.360879 | 0.363 | 0.028 | 0        | 2 | 0.090544 |
| RAB2A   | 0        | 0.469749 | 0.965 | 0.864 | 0        | 2 | 0.882947 |
| RAB33A  | 0        | 0.535692 | 0.649 | 0.181 | 0        | 2 | 0.26751  |
| RAB3A   | 0        | 0.923624 | 0.842 | 0.163 | 0        | 2 | 0.28908  |
| RAB6A   | 0        | 0.32433  | 0.664 | 0.42  | 0        | 2 | 0.465371 |
| RAB7A   | 3.3E-300 | 0.279725 | 0.745 | 0.579 | 1.1E-295 | 2 | 0.609467 |
| RABAC1  | 0        | 0.291481 | 0.961 | 0.911 | 0        | 2 | 0.920365 |
| RABEP1  | 2.8E-295 | 0.288899 | 0.697 | 0.518 | 9.3E-291 | 2 | 0.55094  |
| RALYL   | 0        | 0.661759 | 0.521 | 0.031 | 0        | 2 | 0.121673 |
| RASL11B | 0        | 0.640529 | 0.53  | 0.124 | 0        | 2 | 0.199105 |
| RBFOX2  | 0        | 0.848172 | 0.952 | 0.493 | 0        | 2 | 0.578409 |
| RBFOX3  | 0        | 0.722447 | 0.663 | 0.057 | 0        | 2 | 0.169361 |
| RDH11   | 3.4E-298 | 0.297226 | 0.794 | 0.656 | 1.1E-293 | 2 | 0.681461 |
| REEP1   | 0        | 0.366599 | 0.492 | 0.13  | 0        | 2 | 0.196759 |
| REEP2   | 0        | 0.278606 | 0.528 | 0.294 | 0        | 2 | 0.337266 |
| RERE    | 1E-292   | 0.293497 | 0.807 | 0.672 | 3.4E-288 | 2 | 0.696777 |
| RGMB    | 0        | 0.447639 | 0.371 | 0.112 | 0        | 2 | 0.159696 |
| RGS17   | 0        | 0.494006 | 0.568 | 0.152 | 0        | 2 | 0.228777 |
| RIAD1   | 0        | 0.286515 | 0.319 | 0.033 | 0        | 2 | 0.085853 |
| RNF11   | 0        | 0.26717  | 0.514 | 0.288 | 0        | 2 | 0.32991  |
| RNF146  | 2.3E-296 | 0.268527 | 0.569 | 0.351 | 7.6E-292 | 2 | 0.391493 |
| RNF187  | 8.5E-249 | 0.265647 | 0.877 | 0.807 | 2.9E-244 | 2 | 0.82044  |
| RNF24   | 0        | 0.349865 | 0.705 | 0.461 | 0        | 2 | 0.506343 |
| RNF5    | 0        | 0.316833 | 0.819 | 0.653 | 0        | 2 | 0.68402  |
| ROGDI   | 0        | 0.504839 | 0.697 | 0.304 | 0        | 2 | 0.376604 |
| RPAIN   | 0        | 0.570538 | 0.977 | 0.868 | 0        | 2 | 0.888526 |
| RPS6KL1 | 0        | 0.300674 | 0.392 | 0.076 | 0        | 2 | 0.134608 |
| RTL8C   | 1.5E-279 | 0.296052 | 0.671 | 0.491 | 4.9E-275 | 2 | 0.524146 |
| RTN1    | 0        | 1.558034 | 0.934 | 0.206 | 0        | 2 | 0.341246 |
| RTN2    | 0        | 0.596012 | 0.689 | 0.154 | 0        | 2 | 0.253331 |
| RTN3    | 0        | 0.449846 | 0.983 | 0.934 | 0        | 2 | 0.943143 |
| RTN4    | 0        | 0.56368  | 0.997 | 0.979 | 0        | 2 | 0.982588 |
| RUFY2   | 0        | 0.296317 | 0.571 | 0.324 | 0        | 2 | 0.370101 |
| RUFY3   | 0        | 0.577015 | 0.891 | 0.575 | 0        | 2 | 0.633702 |
| RUNDC3A | 0        | 0.498707 | 0.56  | 0.065 | 0        | 2 | 0.156427 |
| RUNX1T1 | 0        | 0.606153 | 0.52  | 0.08  | 0        | 2 | 0.161686 |
| SAMD14  | 0        | 0.271708 | 0.41  | 0.147 | 0        | 2 | 0.1958   |
| SARAF   | 0        | 0.437157 | 0.98  | 0.905 | 0        | 2 | 0.918979 |
| SAT2    | 0        | 0.521427 | 0.953 | 0.824 | 0        | 2 | 0.848229 |
| SBK1    | 0        | 0.551022 | 0.835 | 0.494 | 0        | 2 | 0.556981 |
| SCARB2  | 1.6E-253 | 0.268802 | 0.623 | 0.43  | 5.3E-249 | 2 | 0.466224 |

|          |          |          |       |       |          |   |          |
|----------|----------|----------|-------|-------|----------|---|----------|
| SCD5     | 0        | 0.444371 | 0.618 | 0.286 | 0        | 2 | 0.347216 |
| SCG3     | 0        | 1.010536 | 0.91  | 0.149 | 0        | 2 | 0.290324 |
| SCRT2    | 0        | 0.539123 | 0.564 | 0.052 | 0        | 2 | 0.146974 |
| SEC11C   | 0        | 0.697103 | 0.939 | 0.679 | 0        | 2 | 0.726804 |
| SELENOW  | 0        | 0.666852 | 0.973 | 0.857 | 0        | 2 | 0.878149 |
| SERINC1  | 0        | 0.453139 | 0.739 | 0.397 | 0        | 2 | 0.460822 |
| SERPINI1 | 0        | 0.378995 | 0.451 | 0.13  | 0        | 2 | 0.189474 |
| SETBP1   | 0        | 0.314359 | 0.652 | 0.428 | 0        | 2 | 0.469386 |
| SEZ6     | 0        | 0.753695 | 0.605 | 0.022 | 0        | 2 | 0.129953 |
| SEZ6L2   | 0        | 0.885822 | 0.844 | 0.187 | 0        | 2 | 0.308447 |
| SH3BGRL3 | 0        | 0.513576 | 0.938 | 0.828 | 0        | 2 | 0.8483   |
| SH3BP5   | 0        | 0.764532 | 0.773 | 0.159 | 0        | 2 | 0.272947 |
| SH3GL2   | 0        | 0.384232 | 0.432 | 0.079 | 0        | 2 | 0.144131 |
| SHB      | 0        | 0.487317 | 0.525 | 0.105 | 0        | 2 | 0.182723 |
| SHTN1    | 0        | 0.38645  | 0.495 | 0.195 | 0        | 2 | 0.250524 |
| SIGIRR   | 8.9E-236 | 0.28745  | 0.48  | 0.294 | 3E-231   | 2 | 0.328631 |
| SLA      | 0        | 0.432161 | 0.312 | 0.006 | 0        | 2 | 0.062649 |
| SLC17A7  | 0        | 0.565487 | 0.505 | 0.012 | 0        | 2 | 0.103052 |
| SLC1A2   | 0        | 0.383121 | 0.553 | 0.294 | 0        | 2 | 0.341957 |
| SLC22A17 | 0        | 0.458792 | 0.765 | 0.446 | 0        | 2 | 0.504922 |
| SLC22A23 | 0        | 0.52367  | 0.532 | 0.135 | 0        | 2 | 0.208841 |
| SLC25A11 | 5E-273   | 0.280437 | 0.741 | 0.585 | 1.7E-268 | 2 | 0.613873 |
| SLC25A4  | 0        | 0.465323 | 0.881 | 0.672 | 0        | 2 | 0.710387 |
| SLC2A6   | 0        | 0.27161  | 0.404 | 0.141 | 0        | 2 | 0.190043 |
| SLC8A1   | 0        | 0.260668 | 0.347 | 0.127 | 0        | 2 | 0.168118 |
| SLCO5A1  | 5.3E-257 | 0.339876 | 0.528 | 0.33  | 1.8E-252 | 2 | 0.366831 |
| SLIT1    | 0        | 0.393674 | 0.404 | 0.039 | 0        | 2 | 0.106926 |
| SMAP2    | 0        | 0.257608 | 0.467 | 0.232 | 0        | 2 | 0.275328 |
| SMARCA2  | 3.8E-181 | 0.275563 | 0.336 | 0.183 | 1.3E-176 | 2 | 0.211613 |
| SMARCA4  | 0        | 0.373778 | 0.95  | 0.881 | 0        | 2 | 0.89414  |
| SMDT1    | 0        | 0.325255 | 0.945 | 0.889 | 0        | 2 | 0.899364 |
| SMIM14   | 0        | 0.334758 | 0.66  | 0.424 | 0        | 2 | 0.467645 |
| SNAP25   | 0        | 0.613717 | 0.599 | 0.1   | 0        | 2 | 0.192495 |
| SNCA     | 0        | 0.660142 | 0.657 | 0.271 | 0        | 2 | 0.34288  |
| SNCB     | 0        | 0.845503 | 0.631 | 0.027 | 0        | 2 | 0.138837 |
| SNRPN    | 0        | 0.594549 | 0.985 | 0.906 | 0        | 2 | 0.920721 |
| SNX4     | 0        | 0.30142  | 0.581 | 0.35  | 0        | 2 | 0.39295  |
| SORBS2   | 0        | 0.618621 | 0.762 | 0.372 | 0        | 2 | 0.444298 |
| SOX11    | 0        | 0.736253 | 0.965 | 0.918 | 0        | 2 | 0.926762 |
| SOX4     | 0        | 1.216923 | 1     | 0.978 | 0        | 2 | 0.981735 |
| SOX5     | 0        | 0.504298 | 0.688 | 0.523 | 0        | 2 | 0.55396  |
| SPAST    | 0        | 0.290464 | 0.573 | 0.346 | 0        | 2 | 0.387904 |
| SPINT2   | 0        | 0.523698 | 0.748 | 0.314 | 0        | 2 | 0.394229 |
| SPIRE1   | 0        | 0.445238 | 0.581 | 0.311 | 0        | 2 | 0.36111  |
| SPTAN1   | 0        | 0.684025 | 0.812 | 0.525 | 0        | 2 | 0.578373 |
| SPTBN1   | 0        | 0.419375 | 0.635 | 0.379 | 0        | 2 | 0.426104 |
| SRGAP1   | 0        | 0.596742 | 0.723 | 0.375 | 0        | 2 | 0.439288 |
| SRGAP3   | 1.4E-247 | 0.297057 | 0.829 | 0.721 | 4.6E-243 | 2 | 0.741018 |

|          |          |          |       |       |          |   |          |
|----------|----------|----------|-------|-------|----------|---|----------|
| SRPK2    | 1.8E-283 | 0.292046 | 0.822 | 0.72  | 6.1E-279 | 2 | 0.738709 |
| SRRM3    | 0        | 0.269053 | 0.345 | 0.05  | 0        | 2 | 0.104936 |
| SRRM4    | 0        | 0.618097 | 0.647 | 0.077 | 0        | 2 | 0.182403 |
| SSR4     | 0        | 0.301224 | 0.954 | 0.902 | 0        | 2 | 0.911553 |
| SSTR2    | 0        | 2.058845 | 0.934 | 0.105 | 0        | 2 | 0.258662 |
| ST18     | 0        | 0.323674 | 0.325 | 0.024 | 0        | 2 | 0.080061 |
| ST6GAL2  | 1.3E-221 | 0.311636 | 0.51  | 0.338 | 4.4E-217 | 2 | 0.369781 |
| STARD3NL | 0        | 0.29523  | 0.7   | 0.508 | 0        | 2 | 0.543975 |
| STAU2    | 3.3E-238 | 0.25408  | 0.59  | 0.409 | 1.1E-233 | 2 | 0.442379 |
| STMN1    | 0        | 0.661608 | 0.999 | 0.995 | 0        | 2 | 0.995985 |
| STMN2    | 0        | 1.351207 | 0.894 | 0.173 | 0        | 2 | 0.306315 |
| STMN3    | 0        | 0.289166 | 0.714 | 0.52  | 0        | 2 | 0.555702 |
| STMN4    | 0        | 0.740318 | 0.839 | 0.478 | 0        | 2 | 0.544579 |
| STX12    | 0        | 0.275855 | 0.557 | 0.333 | 0        | 2 | 0.374436 |
| STX7     | 0        | 0.270041 | 0.529 | 0.295 | 0        | 2 | 0.338581 |
| STXBP1   | 0        | 0.62543  | 0.748 | 0.254 | 0        | 2 | 0.345546 |
| SULT4A1  | 0        | 0.280253 | 0.402 | 0.12  | 0        | 2 | 0.17256  |
| SV2A     | 0        | 0.40686  | 0.609 | 0.304 | 0        | 2 | 0.360506 |
| SVBP     | 0        | 0.505655 | 0.879 | 0.655 | 0        | 2 | 0.696422 |
| SYP      | 0        | 0.585184 | 0.722 | 0.23  | 0        | 2 | 0.321239 |
| SYT1     | 0        | 1.223628 | 0.981 | 0.651 | 0        | 2 | 0.71227  |
| SYT11    | 6.2E-252 | 0.274664 | 0.627 | 0.439 | 2.1E-247 | 2 | 0.473615 |
| SYT4     | 0        | 0.609949 | 0.42  | 0.042 | 0        | 2 | 0.112363 |
| SYT5     | 0        | 0.373962 | 0.5   | 0.097 | 0        | 2 | 0.1716   |
| TAC3     | 0        | 0.531367 | 0.17  | 0.015 | 0        | 2 | 0.043389 |
| TAGLN3   | 0        | 1.104995 | 0.984 | 0.457 | 0        | 2 | 0.554565 |
| TANC2    | 0        | 0.270252 | 0.431 | 0.176 | 0        | 2 | 0.223446 |
| TBCB     | 0        | 0.428811 | 0.965 | 0.906 | 0        | 2 | 0.917274 |
| TBR1     | 0        | 0.971465 | 0.812 | 0.062 | 0        | 2 | 0.201023 |
| TCAF1    | 0        | 0.478798 | 0.844 | 0.594 | 0        | 2 | 0.64024  |
| TCEAL2   | 0        | 0.406444 | 0.748 | 0.589 | 0        | 2 | 0.618244 |
| TCEAL4   | 0        | 0.378566 | 0.922 | 0.846 | 0        | 2 | 0.860204 |
| TCF4     | 2.8E-260 | 0.328997 | 0.952 | 0.909 | 9.2E-256 | 2 | 0.917132 |
| TCP10L   | 0        | 0.344364 | 0.319 | 0.054 | 0        | 2 | 0.102804 |
| TDG      | 0        | 0.328112 | 0.809 | 0.653 | 0        | 2 | 0.681532 |
| TERF2IP  | 0        | 0.929496 | 0.988 | 0.763 | 0        | 2 | 0.80484  |
| THRA     | 0        | 0.751679 | 0.827 | 0.343 | 0        | 2 | 0.432607 |
| THSD7A   | 0        | 1.40636  | 0.784 | 0.093 | 0        | 2 | 0.221065 |
| THTPA    | 2.5E-243 | 0.275749 | 0.595 | 0.415 | 8.5E-239 | 2 | 0.448172 |
| TIPRL    | 0        | 0.305515 | 0.756 | 0.597 | 0        | 2 | 0.626133 |
| TM7SF2   | 0        | 0.503059 | 0.897 | 0.68  | 0        | 2 | 0.72023  |
| TMEM132A | 0        | 0.377667 | 0.791 | 0.647 | 0        | 2 | 0.673963 |
| TMEM163  | 0        | 0.441874 | 0.51  | 0.17  | 0        | 2 | 0.233005 |
| TMEM169  | 0        | 0.259956 | 0.336 | 0.065 | 0        | 2 | 0.115277 |
| TMEM178A | 0        | 0.273515 | 0.33  | 0.125 | 0        | 2 | 0.162681 |
| TMEM35A  | 0        | 0.340651 | 0.497 | 0.153 | 0        | 2 | 0.216623 |
| TMEM50A  | 0        | 0.304306 | 0.859 | 0.734 | 0        | 2 | 0.756725 |
| TMEM59   | 0        | 0.393842 | 0.921 | 0.801 | 0        | 2 | 0.823318 |

|         |          |          |       |       |          |   |          |
|---------|----------|----------|-------|-------|----------|---|----------|
| TMEM59L | 0        | 0.448127 | 0.71  | 0.442 | 0        | 2 | 0.491987 |
| TMOD2   | 0        | 0.373709 | 0.533 | 0.178 | 0        | 2 | 0.243559 |
| TMSB10  | 0        | 1.035473 | 0.999 | 0.998 | 0        | 2 | 0.998472 |
| TMSB4X  | 0        | 0.525472 | 0.999 | 0.999 | 0        | 2 | 0.999005 |
| TNRC6B  | 1.2E-297 | 0.28533  | 0.819 | 0.669 | 3.9E-293 | 2 | 0.696848 |
| TOP2B   | 0        | 0.342401 | 0.871 | 0.767 | 0        | 2 | 0.786433 |
| TP53BP1 | 4E-280   | 0.290757 | 0.689 | 0.515 | 1.3E-275 | 2 | 0.547067 |
| TP53I11 | 0        | 0.947184 | 0.849 | 0.333 | 0        | 2 | 0.428556 |
| TRAF4   | 0        | 0.297593 | 0.573 | 0.322 | 0        | 2 | 0.368573 |
| TRAPPC4 | 1.2E-273 | 0.268407 | 0.811 | 0.695 | 4E-269   | 2 | 0.716819 |
| TSG101  | 0        | 0.360136 | 0.817 | 0.616 | 0        | 2 | 0.653104 |
| TSPAN13 | 0        | 0.6001   | 0.879 | 0.618 | 0        | 2 | 0.666323 |
| TSPAN14 | 1.6E-289 | 0.281317 | 0.631 | 0.432 | 5.3E-285 | 2 | 0.468995 |
| TSPAN18 | 0        | 0.336765 | 0.567 | 0.338 | 0        | 2 | 0.380406 |
| TSPAN4  | 3E-233   | 0.325624 | 0.617 | 0.452 | 9.9E-229 | 2 | 0.482286 |
| TSPYL4  | 0        | 0.307225 | 0.656 | 0.449 | 0        | 2 | 0.487047 |
| TTC3    | 0        | 0.803331 | 0.995 | 0.951 | 0        | 2 | 0.95885  |
| TTC9B   | 0        | 0.883001 | 0.757 | 0.096 | 0        | 2 | 0.218684 |
| TTLL7   | 0        | 0.395144 | 0.612 | 0.272 | 0        | 2 | 0.335311 |
| TUBA1A  | 0        | 1.137443 | 1     | 1     | 0        | 2 | 0.999609 |
| TUBB    | 0        | 0.449768 | 0.999 | 0.997 | 0        | 2 | 0.997761 |
| TUBB2A  | 0        | 1.158588 | 0.996 | 0.9   | 0        | 2 | 0.917451 |
| TUBB2B  | 0        | 0.889739 | 1     | 0.995 | 0        | 2 | 0.995736 |
| TUBB3   | 0        | 0.578396 | 0.741 | 0.303 | 0        | 2 | 0.384279 |
| TUBB4A  | 0        | 0.435918 | 0.542 | 0.14  | 0        | 2 | 0.21474  |
| UBA1    | 0        | 0.303509 | 0.814 | 0.676 | 0        | 2 | 0.701787 |
| UBE2D1  | 0        | 0.408445 | 0.751 | 0.496 | 0        | 2 | 0.543549 |
| UBE2H   | 6.5E-282 | 0.27274  | 0.647 | 0.441 | 2.2E-277 | 2 | 0.478981 |
| UBE2M   | 1.9E-286 | 0.257567 | 0.934 | 0.881 | 6.4E-282 | 2 | 0.890729 |
| UCHL1   | 0        | 0.569301 | 0.989 | 0.95  | 0        | 2 | 0.957251 |
| UNC5A   | 0        | 0.473826 | 0.467 | 0.029 | 0        | 2 | 0.110622 |
| UQCR11  | 0        | 0.374373 | 0.983 | 0.957 | 0        | 2 | 0.962226 |
| USB1    | 0        | 0.317455 | 0.614 | 0.377 | 0        | 2 | 0.420952 |
| VAMP2   | 0        | 0.602427 | 0.939 | 0.734 | 0        | 2 | 0.772041 |
| VASH2   | 0        | 0.257925 | 0.37  | 0.106 | 0        | 2 | 0.155041 |
| VAT1    | 0        | 0.359591 | 0.581 | 0.279 | 0        | 2 | 0.334636 |
| VBP1    | 4.3E-304 | 0.269161 | 0.901 | 0.83  | 1.4E-299 | 2 | 0.843538 |
| VDAC2   | 0        | 0.394885 | 0.979 | 0.944 | 0        | 2 | 0.95057  |
| VPS26B  | 0        | 0.296604 | 0.54  | 0.301 | 0        | 2 | 0.345226 |
| VPS28   | 0        | 0.342007 | 0.952 | 0.878 | 0        | 2 | 0.891546 |
| VSTM2B  | 4.3E-303 | 0.271813 | 0.253 | 0.079 | 1.4E-298 | 2 | 0.111261 |
| WBP2    | 0        | 0.324202 | 0.623 | 0.366 | 0        | 2 | 0.41356  |
| WDR47   | 0        | 0.353324 | 0.53  | 0.206 | 0        | 2 | 0.265982 |
| WNT7B   | 0        | 0.370317 | 0.457 | 0.215 | 0        | 2 | 0.259621 |
| WRB     | 0        | 0.329065 | 0.735 | 0.53  | 0        | 2 | 0.567926 |
| WSB2    | 0        | 0.350924 | 0.609 | 0.333 | 0        | 2 | 0.384563 |
| XPR1    | 0        | 0.613619 | 0.615 | 0.214 | 0        | 2 | 0.288298 |
| YPEL1   | 1E-246   | 0.275225 | 0.589 | 0.399 | 3.5E-242 | 2 | 0.434135 |

|           |          |          |       |       |          |   |          |
|-----------|----------|----------|-------|-------|----------|---|----------|
| YPEL3     | 0        | 0.308941 | 0.612 | 0.354 | 0        | 2 | 0.401549 |
| YWHAB     | 0        | 0.418946 | 0.989 | 0.971 | 0        | 2 | 0.974486 |
| YWHAG     | 0        | 0.531588 | 0.843 | 0.546 | 0        | 2 | 0.601009 |
| YWHAH     | 0        | 0.453526 | 0.946 | 0.854 | 0        | 2 | 0.871291 |
| YWHAQ     | 0        | 0.276508 | 0.992 | 0.986 | 0        | 2 | 0.987101 |
| YWHAZ     | 0        | 0.362211 | 0.979 | 0.937 | 0        | 2 | 0.944991 |
| ZBTB18    | 0        | 1.039627 | 0.777 | 0.184 | 0        | 2 | 0.29409  |
| ZC2HC1A   | 0        | 0.296233 | 0.672 | 0.423 | 0        | 2 | 0.469351 |
| ZCCHC17   | 0        | 0.361273 | 0.859 | 0.733 | 0        | 2 | 0.756192 |
| ZEB2      | 0        | 0.911688 | 0.651 | 0.148 | 0        | 2 | 0.241214 |
| ZFAND6    | 0        | 0.417273 | 0.774 | 0.541 | 0        | 2 | 0.583988 |
| ZFPM2     | 0        | 0.609386 | 0.611 | 0.131 | 0        | 2 | 0.220248 |
| ZMAT2     | 2.4E-243 | 0.262502 | 0.765 | 0.648 | 8E-239   | 2 | 0.669379 |
| ZNF148    | 1.3E-181 | 0.286835 | 0.682 | 0.584 | 4.4E-177 | 2 | 0.602075 |
| ZNF428    | 0        | 0.409065 | 0.993 | 0.98  | 0        | 2 | 0.982552 |
| ZNF462    | 7.9E-215 | 0.270442 | 0.839 | 0.741 | 2.6E-210 | 2 | 0.759355 |
| ZNF821    | 1.8E-298 | 0.268503 | 0.616 | 0.404 | 5.9E-294 | 2 | 0.442984 |
| ZNF91     | 0        | 0.348559 | 0.739 | 0.518 | 0        | 2 | 0.558758 |
| ZNRF1     | 0        | 0.392377 | 0.821 | 0.616 | 0        | 2 | 0.65385  |
| MARCH6    | 9E-117   | 0.35093  | 0.755 | 0.714 | 3E-112   | 3 | 0.716997 |
| SEPT3     | 2.2E-250 | 0.510625 | 0.686 | 0.432 | 7.3E-246 | 3 | 0.449842 |
| SEPT6     | 2.8E-118 | 0.373322 | 0.519 | 0.34  | 9.3E-114 | 3 | 0.352475 |
| AAK1      | 7.1E-268 | 0.562288 | 0.745 | 0.531 | 2.4E-263 | 3 | 0.546356 |
| AASDHPPT  | 2.1E-225 | 0.490213 | 0.786 | 0.658 | 6.9E-221 | 3 | 0.666892 |
| ABHD14A   | 1.71E-88 | 0.320724 | 0.57  | 0.459 | 5.74E-84 | 3 | 0.466615 |
| AC004540. | 3.54E-67 | 0.306895 | 0.303 | 0.18  | 1.19E-62 | 3 | 0.188551 |
| AC116565. | 3.8E-242 | 0.27924  | 0.263 | 0.063 | 1.3E-237 | 3 | 0.077183 |
| AC245297. | 7.9E-255 | 0.303435 | 0.264 | 0.063 | 2.6E-250 | 3 | 0.077503 |
| ACAP3     | 7.21E-68 | 0.27756  | 0.394 | 0.265 | 2.42E-63 | 3 | 0.273906 |
| ACOT7     | 5.3E-120 | 0.3761   | 0.632 | 0.511 | 1.8E-115 | 3 | 0.519313 |
| ACSL3     | 6.04E-63 | 0.294039 | 0.595 | 0.543 | 2.02E-58 | 3 | 0.546356 |
| ACSL4     | 1.3E-166 | 0.375742 | 0.39  | 0.177 | 4.3E-162 | 3 | 0.192282 |
| ACTL6B    | 0        | 0.569569 | 0.592 | 0.137 | 0        | 3 | 0.169468 |
| ACTR10    | 4E-263   | 0.520808 | 0.722 | 0.513 | 1.3E-258 | 3 | 0.52802  |
| ACVR2B    | 1.58E-75 | 0.308689 | 0.62  | 0.557 | 5.31E-71 | 3 | 0.561387 |
| ADCY1     | 2.1E-193 | 0.293529 | 0.273 | 0.083 | 7E-189   | 3 | 0.096336 |
| ADGRL1    | 4.96E-93 | 0.321227 | 0.478 | 0.334 | 1.66E-88 | 3 | 0.344373 |
| ADGRL3    | 0        | 0.493905 | 0.421 | 0.097 | 0        | 3 | 0.119932 |
| AFAP1     | 1.8E-208 | 0.357155 | 0.397 | 0.157 | 6.1E-204 | 3 | 0.17391  |
| AGAP1     | 6.5E-104 | 0.371876 | 0.494 | 0.342 | 2.2E-99  | 3 | 0.352688 |
| AKAP5     | 1.5E-129 | 0.250267 | 0.211 | 0.069 | 4.9E-125 | 3 | 0.078604 |
| AKAP6     | 6.4E-268 | 0.354274 | 0.356 | 0.106 | 2.2E-263 | 3 | 0.123485 |
| AKAP9     | 0        | 0.795215 | 0.956 | 0.815 | 0        | 3 | 0.825237 |
| AKR1C1    | 0        | 0.446245 | 0.422 | 0.092 | 0        | 3 | 0.115312 |
| AKR1C2    | 0        | 0.375149 | 0.331 | 0.057 | 0        | 3 | 0.076294 |
| ALCAM     | 1.4E-265 | 0.295729 | 0.178 | 0.027 | 4.7E-261 | 3 | 0.037774 |
| AMER2     | 8E-191   | 0.341301 | 0.539 | 0.256 | 2.7E-186 | 3 | 0.275967 |
| AMPH      | 4.08E-84 | 0.268374 | 0.293 | 0.151 | 1.37E-79 | 3 | 0.160691 |



|           |          |          |       |       |          |   |          |
|-----------|----------|----------|-------|-------|----------|---|----------|
| ANK2      | 0        | 0.875513 | 0.688 | 0.184 | 0        | 3 | 0.220035 |
| ANK3      | 0        | 1.113547 | 0.88  | 0.252 | 0        | 3 | 0.296294 |
| ANKRD12   | 0        | 0.785938 | 0.926 | 0.77  | 0        | 3 | 0.780569 |
| ANKRD13D  | 5.7E-121 | 0.349973 | 0.532 | 0.373 | 1.9E-116 | 3 | 0.384492 |
| ANKRD36   | 1.5E-132 | 0.379294 | 0.431 | 0.245 | 5E-128   | 3 | 0.25788  |
| ANKRD36C  | 5.9E-193 | 0.492721 | 0.613 | 0.403 | 2E-188   | 3 | 0.418144 |
| ANKRD46   | 3E-259   | 0.512403 | 0.63  | 0.374 | 1E-254   | 3 | 0.392061 |
| ANKS1B    | 0        | 0.598964 | 0.483 | 0.121 | 0        | 3 | 0.146335 |
| AP002884. | 0        | 0.336392 | 0.289 | 0.061 | 0        | 3 | 0.077005 |
| AP1S1     | 5.6E-183 | 0.431244 | 0.801 | 0.724 | 1.9E-178 | 3 | 0.729043 |
| AP1S2     | 2.1E-282 | 0.762713 | 0.797 | 0.658 | 6.9E-278 | 3 | 0.667354 |
| AP2A2     | 5.48E-55 | 0.261673 | 0.489 | 0.409 | 1.84E-50 | 3 | 0.414449 |
| AP2B1     | 1.4E-184 | 0.452539 | 0.757 | 0.655 | 4.6E-180 | 3 | 0.661952 |
| AP2M1     | 1.6E-161 | 0.326319 | 0.926 | 0.939 | 5.4E-157 | 3 | 0.937742 |
| APBA2     | 9.3E-59  | 0.277358 | 0.495 | 0.405 | 3.12E-54 | 3 | 0.411393 |
| APBB1     | 7.96E-59 | 0.266883 | 0.45  | 0.349 | 2.67E-54 | 3 | 0.356171 |
| APC       | 0        | 0.685113 | 0.766 | 0.474 | 0        | 3 | 0.494261 |
| APC2      | 0        | 0.624259 | 0.705 | 0.397 | 0        | 3 | 0.418322 |
| APLP1     | 0        | 0.994955 | 0.953 | 0.597 | 0        | 3 | 0.621833 |
| APLP2     | 1.2E-112 | 0.358627 | 0.766 | 0.718 | 4E-108   | 3 | 0.721581 |
| APOPT1    | 7.17E-66 | 0.283449 | 0.616 | 0.585 | 2.4E-61  | 3 | 0.587435 |
| APP       | 0        | 0.997261 | 0.931 | 0.695 | 0        | 3 | 0.711275 |
| ARF3      | 1.4E-75  | 0.286056 | 0.624 | 0.565 | 4.69E-71 | 3 | 0.569489 |
| ARG2      | 1.8E-131 | 0.372477 | 0.553 | 0.382 | 6.1E-127 | 3 | 0.394194 |
| ARHGAP21  | 1.8E-157 | 0.425873 | 0.742 | 0.633 | 6.1E-153 | 3 | 0.640667 |
| ARHGDIG   | 0        | 0.637415 | 0.516 | 0.119 | 0        | 3 | 0.147081 |
| ARHGEF12  | 1.1E-233 | 0.490127 | 0.584 | 0.33  | 3.7E-229 | 3 | 0.348353 |
| ARHGEF7   | 4.16E-84 | 0.328041 | 0.474 | 0.351 | 1.39E-79 | 3 | 0.359689 |
| ARHGEF9   | 7.78E-82 | 0.313707 | 0.556 | 0.452 | 2.61E-77 | 3 | 0.459223 |
| ARID4A    | 0        | 0.573911 | 0.786 | 0.564 | 0        | 3 | 0.579759 |
| ARID5B    | 1.52E-53 | 0.392472 | 0.429 | 0.335 | 5.09E-49 | 3 | 0.341992 |
| ARL4C     | 0        | 0.664417 | 0.697 | 0.332 | 0        | 3 | 0.357876 |
| ARL6IP5   | 1.3E-235 | 0.481353 | 0.841 | 0.752 | 4.3E-231 | 3 | 0.758111 |
| ARL8A     | 1.2E-196 | 0.442466 | 0.674 | 0.486 | 4.2E-192 | 3 | 0.499058 |
| ARMCX1    | 5.01E-76 | 0.272636 | 0.32  | 0.183 | 1.68E-71 | 3 | 0.192353 |
| ARMCX3    | 1.1E-237 | 0.515785 | 0.734 | 0.556 | 3.8E-233 | 3 | 0.568672 |
| ARMH4     | 2.42E-52 | 0.279112 | 0.502 | 0.429 | 8.12E-48 | 3 | 0.434171 |
| ARPC2     | 2.8E-125 | 0.259068 | 0.937 | 0.952 | 9.4E-121 | 3 | 0.951246 |
| ARPC5     | 1.7E-176 | 0.403002 | 0.845 | 0.804 | 5.8E-172 | 3 | 0.80715  |
| ARPP19    | 9.04E-68 | 0.252895 | 0.751 | 0.761 | 3.03E-63 | 3 | 0.759994 |
| ARPP21    | 0        | 0.701983 | 0.423 | 0.054 | 0        | 3 | 0.080239 |
| ARRDC4    | 1.3E-156 | 0.275941 | 0.261 | 0.089 | 4.2E-152 | 3 | 0.100956 |
| ASAH1     | 4.62E-44 | 0.256932 | 0.564 | 0.537 | 1.55E-39 | 3 | 0.538858 |
| ASB8      | 8.95E-72 | 0.282988 | 0.499 | 0.396 | 3E-67    | 3 | 0.403681 |
| ASGR1     | 4.48E-84 | 0.30668  | 0.397 | 0.258 | 1.5E-79  | 3 | 0.267865 |
| ASH1L     | 2.65E-35 | 0.25508  | 0.535 | 0.519 | 8.9E-31  | 3 | 0.520451 |
| ASPHD1    | 0        | 0.374286 | 0.354 | 0.076 | 0        | 3 | 0.096016 |
| ASXL3     | 0        | 0.480012 | 0.48  | 0.175 | 0        | 3 | 0.196084 |

|          |          |          |       |       |          |   |          |
|----------|----------|----------|-------|-------|----------|---|----------|
| ATAD1    | 9.47E-71 | 0.282173 | 0.49  | 0.389 | 3.18E-66 | 3 | 0.39597  |
| ATAT1    | 6.4E-253 | 0.51676  | 0.713 | 0.493 | 2.2E-248 | 3 | 0.508546 |
| ATCAY    | 4.8E-215 | 0.464735 | 0.681 | 0.452 | 1.6E-210 | 3 | 0.467787 |
| ATL1     | 6.7E-206 | 0.464218 | 0.653 | 0.442 | 2.2E-201 | 3 | 0.456807 |
| ATP13A2  | 6.87E-71 | 0.281997 | 0.424 | 0.303 | 2.3E-66  | 3 | 0.311396 |
| ATP1A3   | 0        | 0.607548 | 0.626 | 0.198 | 0        | 3 | 0.228492 |
| ATP1B1   | 0        | 0.756884 | 0.757 | 0.428 | 0        | 3 | 0.450979 |
| ATP5IF1  | 2.19E-96 | 0.257598 | 0.926 | 0.948 | 7.34E-92 | 3 | 0.946057 |
| ATP5MD   | 3.7E-101 | 0.261868 | 0.904 | 0.934 | 1.22E-96 | 3 | 0.931559 |
| ATP6AP1  | 2.7E-102 | 0.365595 | 0.584 | 0.475 | 9.17E-98 | 3 | 0.482712 |
| ATP6AP2  | 3.4E-225 | 0.486891 | 0.794 | 0.673 | 1.1E-220 | 3 | 0.681426 |
| ATP6VOA1 | 3.4E-221 | 0.456462 | 0.561 | 0.31  | 1.2E-216 | 3 | 0.32792  |
| ATP6VOB  | 0        | 0.691451 | 0.962 | 0.839 | 0        | 3 | 0.847873 |
| ATP6VOD1 | 2.3E-144 | 0.376589 | 0.669 | 0.531 | 7.7E-140 | 3 | 0.54067  |
| ATP6VOE2 | 1.4E-248 | 0.480543 | 0.836 | 0.701 | 4.8E-244 | 3 | 0.710103 |
| ATP6V1A  | 4.6E-253 | 0.435516 | 0.487 | 0.211 | 1.5E-248 | 3 | 0.230589 |
| ATP6V1F  | 1.6E-173 | 0.341994 | 0.922 | 0.926 | 5.2E-169 | 3 | 0.926122 |
| ATP6V1G1 | 1.7E-144 | 0.279051 | 0.962 | 0.968 | 5.8E-140 | 3 | 0.967983 |
| ATP6V1G2 | 0        | 0.529776 | 0.559 | 0.213 | 0        | 3 | 0.237376 |
| ATP6V1H  | 4.3E-131 | 0.358611 | 0.519 | 0.342 | 1.4E-126 | 3 | 0.354749 |
| ATP8A2   | 1.8E-194 | 0.330316 | 0.335 | 0.119 | 6E-190   | 3 | 0.133933 |
| ATP9A    | 3.8E-280 | 0.491081 | 0.519 | 0.227 | 1.3E-275 | 3 | 0.247219 |
| ATRX     | 2.4E-152 | 0.371861 | 0.904 | 0.884 | 8.2E-148 | 3 | 0.885612 |
| ATXN1    | 0        | 0.405832 | 0.309 | 0.036 | 0        | 3 | 0.055542 |
| ATXN7L3B | 1.07E-71 | 0.25829  | 0.802 | 0.812 | 3.59E-67 | 3 | 0.811698 |
| AUTS2    | 4.2E-139 | 0.319663 | 0.706 | 0.526 | 1.4E-134 | 3 | 0.538431 |
| AZIN1    | 3.23E-67 | 0.288738 | 0.495 | 0.398 | 1.08E-62 | 3 | 0.405138 |
| B4GAT1   | 5.35E-44 | 0.25804  | 0.47  | 0.408 | 1.79E-39 | 3 | 0.412245 |
| BAALC    | 8.4E-277 | 0.369562 | 0.345 | 0.097 | 2.8E-272 | 3 | 0.114921 |
| BARHL2   | 0        | 0.589883 | 0.268 | 0.003 | 0        | 3 | 0.021961 |
| BASP1    | 0        | 0.763487 | 0.995 | 0.994 | 0        | 3 | 0.993995 |
| BAZ2B    | 3.8E-54  | 0.33215  | 0.615 | 0.586 | 1.27E-49 | 3 | 0.588039 |
| BEX1     | 0        | 0.559873 | 0.969 | 0.944 | 0        | 3 | 0.945524 |
| BEX2     | 0        | 0.693382 | 0.936 | 0.839 | 0        | 3 | 0.845848 |
| BEX4     | 0        | 0.605926 | 0.95  | 0.895 | 0        | 3 | 0.898937 |
| BEX5     | 0        | 0.582461 | 0.475 | 0.165 | 0        | 3 | 0.186525 |
| BIN1     | 4.44E-55 | 0.258617 | 0.342 | 0.233 | 1.49E-50 | 3 | 0.240681 |
| BLCAP    | 0        | 0.71071  | 0.724 | 0.35  | 0        | 3 | 0.376532 |
| BLOC1S2  | 6.55E-89 | 0.304466 | 0.627 | 0.548 | 2.2E-84  | 3 | 0.553783 |
| BMPR2    | 5.55E-97 | 0.347128 | 0.504 | 0.367 | 1.86E-92 | 3 | 0.376248 |
| BOD1L1   | 2.8E-154 | 0.381808 | 0.85  | 0.81  | 9.5E-150 | 3 | 0.813049 |
| BRI3     | 1.8E-107 | 0.271972 | 0.91  | 0.936 | 6.1E-103 | 3 | 0.933727 |
| BRK1     | 3.9E-138 | 0.272295 | 0.945 | 0.964 | 1.3E-133 | 3 | 0.963008 |
| BRSK1    | 4.7E-212 | 0.38339  | 0.434 | 0.185 | 1.6E-207 | 3 | 0.202551 |
| BSDC1    | 6.1E-104 | 0.365923 | 0.525 | 0.384 | 2E-99    | 3 | 0.393554 |
| BTBD10   | 1.02E-79 | 0.257189 | 0.379 | 0.238 | 3.41E-75 | 3 | 0.247504 |
| BTBD8    | 2.4E-160 | 0.267858 | 0.267 | 0.091 | 8.1E-156 | 3 | 0.103017 |
| BTG1     | 1.49E-62 | 0.390581 | 0.828 | 0.855 | 4.98E-58 | 3 | 0.85299  |

|           |          |          |       |       |          |   |          |
|-----------|----------|----------|-------|-------|----------|---|----------|
| C11orf96  | 1.5E-213 | 0.374165 | 0.309 | 0.093 | 5.1E-209 | 3 | 0.10817  |
| C12orf73  | 2.16E-44 | 0.254179 | 0.44  | 0.366 | 7.26E-40 | 3 | 0.371167 |
| C12orf76  | 1.07E-96 | 0.341062 | 0.596 | 0.501 | 3.59E-92 | 3 | 0.507764 |
| C14orf132 | 1.2E-207 | 0.484842 | 0.599 | 0.38  | 3.9E-203 | 3 | 0.395615 |
| C16orf45  | 1.2E-268 | 0.52517  | 0.799 | 0.634 | 3.9E-264 | 3 | 0.645677 |
| C18orf32  | 2.66E-83 | 0.276861 | 0.476 | 0.337 | 8.93E-79 | 3 | 0.346647 |
| C1orf216  | 2.3E-229 | 0.319369 | 0.327 | 0.102 | 7.7E-225 | 3 | 0.117693 |
| C1QTNF4   | 0        | 0.703379 | 0.721 | 0.382 | 0        | 3 | 0.406062 |
| C3orf14   | 3.71E-96 | 0.289384 | 0.721 | 0.594 | 1.24E-91 | 3 | 0.603212 |
| C4orf48   | 0        | 0.485832 | 0.981 | 0.968 | 0        | 3 | 0.968729 |
| CACNA1A   | 8.2E-136 | 0.348464 | 0.402 | 0.201 | 2.8E-131 | 3 | 0.214918 |
| CACNA2D1  | 0        | 0.587087 | 0.504 | 0.172 | 0        | 3 | 0.195835 |
| CACNB3    | 1.35E-60 | 0.259982 | 0.365 | 0.246 | 4.54E-56 | 3 | 0.254575 |
| CACNB4    | 1.4E-132 | 0.312962 | 0.336 | 0.154 | 4.5E-128 | 3 | 0.166696 |
| CACNG2    | 0        | 0.257161 | 0.206 | 0.009 | 0        | 3 | 0.022814 |
| CACNG8    | 2.17E-84 | 0.27404  | 0.358 | 0.203 | 7.27E-80 | 3 | 0.214136 |
| CADM1     | 3.1E-127 | 0.518889 | 0.737 | 0.7   | 1E-122   | 3 | 0.702392 |
| CADM2     | 1E-185   | 0.402576 | 0.293 | 0.098 | 3.4E-181 | 3 | 0.111581 |
| CADM3     | 0        | 0.486749 | 0.444 | 0.124 | 0        | 3 | 0.146477 |
| CALB2     | 1.9E-299 | 0.619521 | 0.366 | 0.095 | 6.4E-295 | 3 | 0.114317 |
| CALM1     | 0        | 0.611744 | 0.988 | 0.991 | 0        | 3 | 0.99037  |
| CALM2     | 0        | 0.520238 | 0.989 | 0.99  | 0        | 3 | 0.989624 |
| CALM3     | 2.4E-206 | 0.368796 | 0.952 | 0.947 | 8.1E-202 | 3 | 0.947159 |
| CALY      | 0        | 0.760032 | 0.498 | 0.111 | 0        | 3 | 0.137913 |
| CAMK2B    | 0        | 0.790286 | 0.605 | 0.077 | 0        | 3 | 0.114459 |
| CAMK2D    | 1.6E-176 | 0.469876 | 0.472 | 0.246 | 5.5E-172 | 3 | 0.261789 |
| CAMK2N1   | 0        | 1.540514 | 0.951 | 0.667 | 0        | 3 | 0.687182 |
| CAMK2N2   | 0        | 0.730166 | 0.567 | 0.091 | 0        | 3 | 0.124729 |
| CAMLG     | 4.34E-85 | 0.261327 | 0.831 | 0.843 | 1.45E-80 | 3 | 0.841868 |
| CAMSAP2   | 4.05E-55 | 0.264054 | 0.427 | 0.33  | 1.36E-50 | 3 | 0.336697 |
| CASK      | 1.7E-116 | 0.37654  | 0.543 | 0.392 | 5.6E-112 | 3 | 0.40258  |
| CCDC112   | 0        | 0.6372   | 0.829 | 0.617 | 0        | 3 | 0.631996 |
| CCDC115   | 1.63E-56 | 0.276644 | 0.477 | 0.399 | 5.45E-52 | 3 | 0.404676 |
| CCDC136   | 3.2E-100 | 0.271213 | 0.303 | 0.149 | 1.07E-95 | 3 | 0.160087 |
| CCDC184   | 0        | 0.479841 | 0.481 | 0.155 | 0        | 3 | 0.177677 |
| CCDC186   | 3.8E-139 | 0.372034 | 0.424 | 0.23  | 1.3E-134 | 3 | 0.243844 |
| CCDC28B   | 1.1E-194 | 0.480151 | 0.756 | 0.656 | 3.7E-190 | 3 | 0.662592 |
| CCDC82    | 3.7E-202 | 0.45487  | 0.624 | 0.412 | 1.2E-197 | 3 | 0.426673 |
| CCDC88A   | 6.4E-187 | 0.475203 | 0.805 | 0.705 | 2.2E-182 | 3 | 0.712199 |
| CCDC90B   | 2.3E-192 | 0.46448  | 0.745 | 0.629 | 7.6E-188 | 3 | 0.637326 |
| CCNG2     | 3.29E-62 | 0.269118 | 0.499 | 0.394 | 1.1E-57  | 3 | 0.401016 |
| CCNI      | 0        | 0.746226 | 0.985 | 0.991 | 0        | 3 | 0.990796 |
| CCSER2    | 3.38E-79 | 0.30717  | 0.542 | 0.441 | 1.13E-74 | 3 | 0.447745 |
| CD200     | 0        | 0.552412 | 0.638 | 0.293 | 0        | 3 | 0.317757 |
| CD24      | 0        | 0.933849 | 0.981 | 0.827 | 0        | 3 | 0.837959 |
| CDC42     | 0        | 0.847853 | 0.967 | 0.867 | 0        | 3 | 0.874205 |
| CDC42EP3  | 1E-175   | 0.385635 | 0.466 | 0.229 | 3.5E-171 | 3 | 0.246047 |
| CDH8      | 8E-246   | 0.334588 | 0.181 | 0.03  | 2.7E-241 | 3 | 0.041008 |

|           |          |          |       |       |          |   |          |
|-----------|----------|----------|-------|-------|----------|---|----------|
| CDK5R1    | 0        | 0.642444 | 0.702 | 0.287 | 0        | 3 | 0.316407 |
| CDK5R2    | 0        | 0.391169 | 0.338 | 0.04  | 0        | 3 | 0.061512 |
| CDKN1C    | 5.2E-139 | 0.435195 | 0.445 | 0.229 | 1.8E-134 | 3 | 0.244448 |
| CDKN2D    | 0        | 1.102205 | 0.909 | 0.353 | 0        | 3 | 0.392061 |
| CELF2     | 2.4E-146 | 0.38151  | 0.841 | 0.778 | 8.2E-142 | 3 | 0.782595 |
| CELF3     | 0        | 0.543007 | 0.61  | 0.188 | 0        | 3 | 0.217547 |
| CELF4     | 0        | 1.132583 | 0.772 | 0.187 | 0        | 3 | 0.227853 |
| CELF5     | 0        | 0.726016 | 0.815 | 0.412 | 0        | 3 | 0.44007  |
| CEP170    | 0        | 0.712378 | 0.877 | 0.616 | 0        | 3 | 0.634626 |
| CHCHD6    | 6.92E-71 | 0.291491 | 0.644 | 0.611 | 2.32E-66 | 3 | 0.613304 |
| CHD5      | 0        | 0.686914 | 0.572 | 0.115 | 0        | 3 | 0.147578 |
| CHD9      | 7.5E-128 | 0.358469 | 0.807 | 0.775 | 2.5E-123 | 3 | 0.77762  |
| CHGB      | 0        | 0.742991 | 0.62  | 0.1   | 0        | 3 | 0.136314 |
| CHMP5     | 7.4E-148 | 0.34515  | 0.821 | 0.778 | 2.5E-143 | 3 | 0.781067 |
| CHN1      | 2.51E-60 | 0.287531 | 0.397 | 0.288 | 8.41E-56 | 3 | 0.296116 |
| CHST1     | 6.8E-277 | 0.27963  | 0.234 | 0.046 | 2.3E-272 | 3 | 0.059344 |
| CHST8     | 7.9E-136 | 0.28579  | 0.336 | 0.134 | 2.7E-131 | 3 | 0.148573 |
| CLASP2    | 0        | 0.715053 | 0.719 | 0.309 | 0        | 3 | 0.338119 |
| CLCN3     | 4.43E-52 | 0.280471 | 0.488 | 0.416 | 1.49E-47 | 3 | 0.421485 |
| CLCN4     | 4.9E-201 | 0.27287  | 0.273 | 0.079 | 1.6E-196 | 3 | 0.092427 |
| CLIP1     | 7.08E-53 | 0.277037 | 0.478 | 0.391 | 2.38E-48 | 3 | 0.397072 |
| CLSTN1    | 7.57E-51 | 0.274596 | 0.544 | 0.497 | 2.54E-46 | 3 | 0.49984  |
| CLTB      | 0        | 0.579827 | 0.829 | 0.635 | 0        | 3 | 0.648449 |
| CLTC      | 6.32E-70 | 0.301408 | 0.62  | 0.567 | 2.12E-65 | 3 | 0.570555 |
| CMAS      | 1.2E-60  | 0.277784 | 0.551 | 0.494 | 4.03E-56 | 3 | 0.497886 |
| CMIP      | 3.1E-247 | 0.497315 | 0.636 | 0.379 | 1E-242   | 3 | 0.39725  |
| CNIH2     | 8.2E-202 | 0.380228 | 0.854 | 0.712 | 2.7E-197 | 3 | 0.721936 |
| CNRIP1    | 1.2E-214 | 0.399001 | 0.367 | 0.138 | 4.1E-210 | 3 | 0.153975 |
| CNTN1     | 0        | 0.316503 | 0.266 | 0.043 | 0        | 3 | 0.058456 |
| CNTNAP2   | 0        | 0.721462 | 0.855 | 0.661 | 0        | 3 | 0.675171 |
| COTL1     | 1.1E-104 | 0.328362 | 0.656 | 0.519 | 3.7E-100 | 3 | 0.528482 |
| COX20     | 1.29E-70 | 0.276311 | 0.738 | 0.74  | 4.31E-66 | 3 | 0.740308 |
| COX6A1    | 5.2E-148 | 0.272446 | 0.969 | 0.98  | 1.8E-143 | 3 | 0.979532 |
| COX7A2    | 0        | 0.447823 | 0.978 | 0.979 | 0        | 3 | 0.97939  |
| CPE       | 0        | 0.614417 | 0.958 | 0.876 | 0        | 3 | 0.882165 |
| CPEB4     | 0        | 0.456055 | 0.482 | 0.169 | 0        | 3 | 0.190825 |
| CREG2     | 9.1E-250 | 0.318078 | 0.279 | 0.067 | 3E-245   | 3 | 0.081767 |
| CRMP1     | 0        | 0.814854 | 0.982 | 0.879 | 0        | 3 | 0.885967 |
| CSAD      | 2.2E-135 | 0.431643 | 0.522 | 0.348 | 7.3E-131 | 3 | 0.360328 |
| CSNK1E    | 4.42E-68 | 0.295209 | 0.662 | 0.633 | 1.48E-63 | 3 | 0.634945 |
| CSRNP3    | 0        | 0.681488 | 0.638 | 0.258 | 0        | 3 | 0.284993 |
| CTIF      | 2.9E-109 | 0.274893 | 0.318 | 0.155 | 9.9E-105 | 3 | 0.16659  |
| CTNND2    | 1.1E-144 | 0.409734 | 0.55  | 0.36  | 3.5E-140 | 3 | 0.373796 |
| CTTNBP2NI | 5.49E-76 | 0.29282  | 0.463 | 0.344 | 1.84E-71 | 3 | 0.352084 |
| CXADR     | 0        | 1.005613 | 0.931 | 0.621 | 0        | 3 | 0.643261 |
| CXXC4     | 0        | 0.439244 | 0.315 | 0.053 | 0        | 3 | 0.071426 |
| CXXC5     | 4.81E-09 | 0.3069   | 0.548 | 0.64  | 0.000161 | 3 | 0.633275 |
| CYCS      | 8.57E-74 | 0.255219 | 0.862 | 0.883 | 2.88E-69 | 3 | 0.881312 |

|          |          |          |       |       |          |   |          |
|----------|----------|----------|-------|-------|----------|---|----------|
| CYTH2    | 3.17E-50 | 0.263986 | 0.55  | 0.5   | 1.06E-45 | 3 | 0.503962 |
| DAAM1    | 0        | 0.666579 | 0.938 | 0.839 | 0        | 3 | 0.845919 |
| DACH2    | 1.4E-125 | 0.262755 | 0.276 | 0.109 | 4.7E-121 | 3 | 0.1205   |
| DACT3    | 1.4E-195 | 0.328443 | 0.361 | 0.138 | 4.7E-191 | 3 | 0.153371 |
| DCLK1    | 0        | 0.623538 | 0.643 | 0.275 | 0        | 3 | 0.301304 |
| DCTN1    | 5.6E-90  | 0.326968 | 0.55  | 0.438 | 1.88E-85 | 3 | 0.44604  |
| DCTN3    | 1.4E-187 | 0.364173 | 0.912 | 0.878 | 4.8E-183 | 3 | 0.880779 |
| DCTN6    | 1.54E-72 | 0.278666 | 0.634 | 0.584 | 5.17E-68 | 3 | 0.587577 |
| DCX      | 0        | 1.433927 | 0.987 | 0.497 | 0        | 3 | 0.53136  |
| DDX24    | 2.4E-101 | 0.308482 | 0.848 | 0.858 | 7.89E-97 | 3 | 0.857361 |
| DEAF1    | 2.5E-108 | 0.366788 | 0.66  | 0.58  | 8.3E-104 | 3 | 0.585907 |
| DGKI     | 1.6E-192 | 0.261078 | 0.218 | 0.055 | 5.4E-188 | 3 | 0.066522 |
| DICER1   | 8.8E-161 | 0.44853  | 0.634 | 0.479 | 2.9E-156 | 3 | 0.490317 |
| DKK3     | 3.8E-109 | 0.335924 | 0.403 | 0.23  | 1.3E-104 | 3 | 0.242315 |
| DLG2     | 0        | 0.39941  | 0.323 | 0.051 | 0        | 3 | 0.070182 |
| DLG4     | 1.38E-95 | 0.280003 | 0.404 | 0.241 | 4.62E-91 | 3 | 0.252621 |
| DLGAP4   | 3E-111   | 0.348924 | 0.694 | 0.606 | 9.9E-107 | 3 | 0.611812 |
| DMTN     | 1.9E-244 | 0.299282 | 0.326 | 0.093 | 6.3E-240 | 3 | 0.109804 |
| DNAJA1   | 3E-242   | 0.364837 | 0.973 | 0.974 | 1E-237   | 3 | 0.974024 |
| DNAJB6   | 0        | 0.526246 | 0.935 | 0.869 | 0        | 3 | 0.873814 |
| DNAJC12  | 0        | 0.367059 | 0.334 | 0.083 | 0        | 3 | 0.100814 |
| DNER     | 6.4E-217 | 0.565252 | 0.732 | 0.581 | 2.1E-212 | 3 | 0.591663 |
| DNM1     | 1.3E-173 | 0.434751 | 0.544 | 0.331 | 4.5E-169 | 3 | 0.346434 |
| DNM3     | 0        | 0.597578 | 0.48  | 0.054 | 0        | 3 | 0.083828 |
| DOC2B    | 5.4E-299 | 0.276954 | 0.237 | 0.044 | 1.8E-294 | 3 | 0.057319 |
| DPF1     | 5.7E-175 | 0.439454 | 0.638 | 0.438 | 1.9E-170 | 3 | 0.452081 |
| DPYSL2   | 0        | 0.590603 | 0.93  | 0.861 | 0        | 3 | 0.865499 |
| DPYSL3   | 0        | 1.018212 | 0.943 | 0.696 | 0        | 3 | 0.713443 |
| DPYSL5   | 9.15E-97 | 0.317188 | 0.71  | 0.654 | 3.07E-92 | 3 | 0.657724 |
| DRAP1    | 9.7E-115 | 0.275985 | 0.894 | 0.907 | 3.2E-110 | 3 | 0.906187 |
| DST      | 0        | 0.616943 | 0.73  | 0.448 | 0        | 3 | 0.468107 |
| DTD1     | 9.1E-133 | 0.324749 | 0.866 | 0.865 | 3E-128   | 3 | 0.864646 |
| DTNA     | 2.1E-257 | 0.367172 | 0.314 | 0.088 | 7.1E-253 | 3 | 0.104296 |
| DUSP26   | 0        | 0.576428 | 0.529 | 0.122 | 0        | 3 | 0.150705 |
| DUSP4    | 0        | 0.55839  | 0.5   | 0.166 | 0        | 3 | 0.189439 |
| DUSP8    | 0        | 0.620935 | 0.573 | 0.179 | 0        | 3 | 0.20678  |
| DYNC1H1  | 0        | 0.626522 | 0.923 | 0.824 | 0        | 3 | 0.830567 |
| DYNC1I2  | 1.5E-276 | 0.513926 | 0.888 | 0.818 | 5E-272   | 3 | 0.822892 |
| DYNC1LI1 | 3.4E-138 | 0.374146 | 0.721 | 0.63  | 1.2E-133 | 3 | 0.63658  |
| DYNC1LI2 | 6.6E-127 | 0.366419 | 0.751 | 0.7   | 2.2E-122 | 3 | 0.703244 |
| DYNLRB1  | 0        | 0.491483 | 0.935 | 0.895 | 0        | 3 | 0.897871 |
| DYNLT1   | 1.3E-112 | 0.260792 | 0.922 | 0.952 | 4.4E-108 | 3 | 0.950108 |
| DZIP3    | 2.5E-174 | 0.41074  | 0.433 | 0.215 | 8.3E-170 | 3 | 0.230731 |
| EBF1     | 5E-221   | 0.33517  | 0.171 | 0.03  | 1.7E-216 | 3 | 0.039693 |
| EEF1A2   | 0        | 0.686086 | 0.856 | 0.614 | 0        | 3 | 0.631356 |
| EFNB3    | 4.1E-61  | 0.255103 | 0.391 | 0.274 | 1.38E-56 | 3 | 0.282613 |
| EIF1B    | 4.2E-264 | 0.447556 | 0.926 | 0.913 | 1.4E-259 | 3 | 0.913471 |
| EIF4A2   | 0        | 0.72686  | 0.965 | 0.883 | 0        | 3 | 0.88849  |



|           |          |          |       |       |          |   |          |
|-----------|----------|----------|-------|-------|----------|---|----------|
| EIF4G2    | 0        | 0.582797 | 0.965 | 0.946 | 0        | 3 | 0.947194 |
| ELAVL2    | 1E-217   | 0.468025 | 0.527 | 0.253 | 3.4E-213 | 3 | 0.272236 |
| ELAVL3    | 0        | 0.559889 | 0.91  | 0.713 | 0        | 3 | 0.727302 |
| ELAVL4    | 2.8E-215 | 0.394818 | 0.716 | 0.374 | 9.4E-211 | 3 | 0.398245 |
| ELMO1     | 4.3E-257 | 0.271021 | 0.205 | 0.038 | 1.4E-252 | 3 | 0.049572 |
| ELOVL4    | 1.6E-130 | 0.317646 | 0.385 | 0.196 | 5.4E-126 | 3 | 0.208948 |
| EMC7      | 2.99E-78 | 0.307771 | 0.592 | 0.509 | 1E-73    | 3 | 0.5148   |
| ENC1      | 0        | 0.825649 | 0.8   | 0.462 | 0        | 3 | 0.486266 |
| ENDOG     | 2.19E-53 | 0.260132 | 0.521 | 0.446 | 7.36E-49 | 3 | 0.451476 |
| ENHO      | 1.6E-194 | 0.463722 | 0.798 | 0.697 | 5.5E-190 | 3 | 0.704559 |
| ENO2      | 1.8E-287 | 0.558338 | 0.778 | 0.558 | 6.2E-283 | 3 | 0.573149 |
| EPB41L1   | 0        | 0.412582 | 0.382 | 0.098 | 0        | 3 | 0.118155 |
| EPB41L4A- | 1.65E-50 | 0.256436 | 0.596 | 0.561 | 5.55E-46 | 3 | 0.563839 |
| EPC1      | 8.3E-143 | 0.409068 | 0.718 | 0.641 | 2.8E-138 | 3 | 0.646779 |
| EPCAM     | 0        | 0.382393 | 0.269 | 0.029 | 0        | 3 | 0.045592 |
| EPHA5     | 2.56E-72 | 0.28642  | 0.279 | 0.146 | 8.58E-68 | 3 | 0.155005 |
| EPM2AIP1  | 7.57E-56 | 0.270117 | 0.558 | 0.502 | 2.54E-51 | 3 | 0.506236 |
| ERC1      | 5.26E-69 | 0.292091 | 0.486 | 0.374 | 1.76E-64 | 3 | 0.381969 |
| ETFB      | 0        | 0.758802 | 0.904 | 0.751 | 0        | 3 | 0.76138  |
| EVL       | 0        | 0.633872 | 0.963 | 0.892 | 0        | 3 | 0.896805 |
| EXOC7     | 7.84E-56 | 0.263719 | 0.533 | 0.47  | 2.63E-51 | 3 | 0.474894 |
| FAIM2     | 1.1E-225 | 0.303279 | 0.298 | 0.086 | 3.6E-221 | 3 | 0.100849 |
| FAM110B   | 1.5E-112 | 0.336751 | 0.395 | 0.222 | 5.1E-108 | 3 | 0.234213 |
| FAM155A   | 0        | 0.302204 | 0.253 | 0.037 | 0        | 3 | 0.052201 |
| FAM177A1  | 2.6E-153 | 0.400342 | 0.654 | 0.508 | 8.6E-149 | 3 | 0.518354 |
| FAM20C    | 9.5E-101 | 0.298202 | 0.336 | 0.178 | 3.2E-96  | 3 | 0.188799 |
| FAM217B   | 1.69E-61 | 0.279917 | 0.364 | 0.247 | 5.66E-57 | 3 | 0.254931 |
| FAM229B   | 2E-115   | 0.353915 | 0.695 | 0.623 | 6.6E-111 | 3 | 0.628158 |
| FAM241B   | 0        | 0.580075 | 0.596 | 0.251 | 0        | 3 | 0.275505 |
| FAM49B    | 2.04E-60 | 0.272357 | 0.688 | 0.698 | 6.83E-56 | 3 | 0.697168 |
| FAM57B    | 4.1E-243 | 0.490423 | 0.659 | 0.396 | 1.4E-238 | 3 | 0.414626 |
| FAM89B    | 2.8E-122 | 0.316086 | 0.836 | 0.804 | 9.5E-118 | 3 | 0.806617 |
| FAXC      | 1.3E-111 | 0.321153 | 0.436 | 0.269 | 4.3E-107 | 3 | 0.280836 |
| FBXW11    | 1.29E-58 | 0.276361 | 0.54  | 0.479 | 4.32E-54 | 3 | 0.482996 |
| FEZ1      | 2E-204   | 0.375887 | 0.954 | 0.933 | 6.6E-200 | 3 | 0.934686 |
| FEZF1     | 2.54E-70 | 0.408174 | 0.114 | 0.035 | 8.53E-66 | 3 | 0.040475 |
| FGF13     | 8.1E-197 | 0.458541 | 0.485 | 0.252 | 2.7E-192 | 3 | 0.268043 |
| FGF14     | 0        | 0.413528 | 0.263 | 0.01  | 0        | 3 | 0.02786  |
| FGF9      | 2.1E-154 | 0.329441 | 0.337 | 0.142 | 6.9E-150 | 3 | 0.155645 |
| FKBP1B    | 4.89E-96 | 0.345797 | 0.617 | 0.533 | 1.64E-91 | 3 | 0.538574 |
| FNBP1L    | 0        | 0.819511 | 0.939 | 0.794 | 0        | 3 | 0.804627 |
| FOXP2     | 3.01E-59 | 0.483183 | 0.16  | 0.069 | 1.01E-54 | 3 | 0.075619 |
| FRRS1L    | 0        | 0.703817 | 0.556 | 0.076 | 0        | 3 | 0.10952  |
| FRY       | 2.9E-176 | 0.263798 | 0.243 | 0.072 | 9.6E-172 | 3 | 0.084219 |
| FSIP2     | 1.05E-29 | 0.266651 | 0.311 | 0.235 | 3.53E-25 | 3 | 0.240432 |
| FST       | 2.4E-137 | 0.55069  | 0.152 | 0.036 | 8.2E-133 | 3 | 0.04417  |
| FTH1      | 0        | 0.435587 | 0.995 | 0.997 | 0        | 3 | 0.997299 |
| FTX       | 1.36E-68 | 0.336775 | 0.558 | 0.48  | 4.55E-64 | 3 | 0.485235 |



|           |          |          |       |       |          |   |          |
|-----------|----------|----------|-------|-------|----------|---|----------|
| FXYD6     | 3.4E-279 | 0.446166 | 0.952 | 0.929 | 1.1E-274 | 3 | 0.931026 |
| FXYD7     | 0        | 0.489704 | 0.46  | 0.124 | 0        | 3 | 0.147578 |
| GABARAPL1 | 1.3E-109 | 0.309696 | 0.44  | 0.263 | 4.5E-105 | 3 | 0.27579  |
| GABARAPL2 | 0        | 0.58002  | 0.963 | 0.925 | 0        | 3 | 0.928112 |
| GABBR1    | 8.54E-72 | 0.282595 | 0.361 | 0.233 | 2.86E-67 | 3 | 0.24228  |
| GABBR2    | 0        | 0.373388 | 0.307 | 0.042 | 0        | 3 | 0.060659 |
| GABRA2    | 1.6E-136 | 0.283021 | 0.195 | 0.057 | 5.3E-132 | 3 | 0.0667   |
| GABRB3    | 0        | 0.619622 | 0.566 | 0.187 | 0        | 3 | 0.213425 |
| GABRG2    | 2E-242   | 0.311775 | 0.229 | 0.049 | 6.6E-238 | 3 | 0.061583 |
| GAP43     | 0        | 1.243259 | 0.977 | 0.753 | 0        | 3 | 0.768416 |
| GAS7      | 3.4E-114 | 0.269945 | 0.283 | 0.124 | 1.1E-109 | 3 | 0.134857 |
| GDAP1     | 6.9E-123 | 0.370258 | 0.544 | 0.384 | 2.3E-118 | 3 | 0.395046 |
| GDAP1L1   | 0        | 0.639093 | 0.709 | 0.299 | 0        | 3 | 0.327814 |
| GDI1      | 6.5E-272 | 0.511919 | 0.778 | 0.545 | 2.2E-267 | 3 | 0.561352 |
| GFOD2     | 1.95E-92 | 0.30744  | 0.496 | 0.362 | 6.54E-88 | 3 | 0.371771 |
| GJD2      | 0        | 0.331444 | 0.228 | 0.008 | 0        | 3 | 0.02356  |
| GNAI1     | 4.55E-93 | 0.342047 | 0.452 | 0.305 | 1.53E-88 | 3 | 0.315092 |
| GNAL      | 0        | 0.411023 | 0.356 | 0.071 | 0        | 3 | 0.091219 |
| GNAO1     | 0        | 0.624431 | 0.7   | 0.398 | 0        | 3 | 0.419672 |
| GNAQ      | 3.2E-141 | 0.417343 | 0.594 | 0.437 | 1.1E-136 | 3 | 0.448136 |
| GNAS      | 0        | 0.393617 | 0.997 | 0.998 | 0        | 3 | 0.998365 |
| GNB1      | 1.4E-120 | 0.344861 | 0.797 | 0.782 | 4.6E-116 | 3 | 0.783341 |
| GNG2      | 0        | 0.73377  | 0.703 | 0.259 | 0        | 3 | 0.290786 |
| GNG3      | 0        | 0.89722  | 0.799 | 0.324 | 0        | 3 | 0.357876 |
| GNPTAB    | 2.1E-265 | 0.453279 | 0.472 | 0.194 | 7E-261   | 3 | 0.213177 |
| GPC2      | 4.7E-255 | 0.536432 | 0.738 | 0.482 | 1.6E-250 | 3 | 0.50048  |
| GPM6A     | 0        | 0.843414 | 0.958 | 0.673 | 0        | 3 | 0.693152 |
| GPR137C   | 6.6E-128 | 0.282379 | 0.27  | 0.107 | 2.2E-123 | 3 | 0.118866 |
| GPR162    | 3.3E-161 | 0.340687 | 0.409 | 0.193 | 1.1E-156 | 3 | 0.207988 |
| GPR27     | 1.96E-57 | 0.275135 | 0.464 | 0.38  | 6.58E-53 | 3 | 0.385914 |
| GPR85     | 0        | 0.341461 | 0.305 | 0.067 | 0        | 3 | 0.083473 |
| GPRIN1    | 3.2E-119 | 0.275442 | 0.351 | 0.173 | 1.1E-114 | 3 | 0.185317 |
| GRB2      | 4.5E-180 | 0.425001 | 0.734 | 0.604 | 1.5E-175 | 3 | 0.613411 |
| GRIA2     | 0        | 1.219135 | 0.706 | 0.13  | 0        | 3 | 0.171138 |
| GRID2     | 6.7E-157 | 0.48928  | 0.324 | 0.133 | 2.3E-152 | 3 | 0.146335 |
| GRIN2B    | 0        | 0.845347 | 0.578 | 0.061 | 0        | 3 | 0.097225 |
| GRIPAP1   | 9.17E-84 | 0.321541 | 0.479 | 0.348 | 3.08E-79 | 3 | 0.357095 |
| GRM3      | 3.6E-141 | 0.318034 | 0.289 | 0.114 | 1.2E-136 | 3 | 0.12679  |
| GSE1      | 2.1E-148 | 0.443579 | 0.524 | 0.325 | 7E-144   | 3 | 0.338972 |
| GSK3B     | 7.3E-108 | 0.334533 | 0.639 | 0.53  | 2.4E-103 | 3 | 0.537436 |
| GSTA4     | 4.7E-158 | 0.349877 | 0.889 | 0.864 | 1.6E-153 | 3 | 0.865819 |
| GUK1      | 2.6E-170 | 0.34566  | 0.907 | 0.899 | 8.7E-166 | 3 | 0.899577 |
| H3F3B     | 0        | 0.618324 | 0.994 | 0.996 | 0        | 3 | 0.995594 |
| HAGH      | 1.4E-122 | 0.349156 | 0.714 | 0.623 | 4.7E-118 | 3 | 0.629295 |
| HCFC1R1   | 1.5E-53  | 0.262491 | 0.513 | 0.435 | 5.03E-49 | 3 | 0.440176 |
| HDGFL3    | 8.8E-243 | 0.498587 | 0.837 | 0.755 | 3E-238   | 3 | 0.760456 |
| HECTD4    | 5.5E-125 | 0.334537 | 0.468 | 0.281 | 1.9E-120 | 3 | 0.294268 |
| HERC1     | 2E-223   | 0.481166 | 0.611 | 0.367 | 6.7E-219 | 3 | 0.384386 |

|           |          |          |       |       |          |   |          |
|-----------|----------|----------|-------|-------|----------|---|----------|
| HERPUD1   | 1.11E-86 | 0.31788  | 0.496 | 0.359 | 3.72E-82 | 3 | 0.368608 |
| HIP1R     | 0        | 0.602582 | 0.588 | 0.238 | 0        | 3 | 0.262322 |
| HK1       | 2.14E-86 | 0.300684 | 0.467 | 0.331 | 7.16E-82 | 3 | 0.340713 |
| HMGCR     | 1.92E-81 | 0.335041 | 0.767 | 0.756 | 6.44E-77 | 3 | 0.756938 |
| HPCAL4    | 1.5E-211 | 0.286524 | 0.259 | 0.07  | 4.9E-207 | 3 | 0.083721 |
| HRAS      | 7.95E-96 | 0.292847 | 0.785 | 0.776 | 2.66E-91 | 3 | 0.776731 |
| HSD11B1L  | 7.76E-55 | 0.270944 | 0.511 | 0.439 | 2.6E-50  | 3 | 0.444298 |
| HSDL1     | 3.1E-115 | 0.356984 | 0.553 | 0.404 | 1.1E-110 | 3 | 0.414555 |
| HSPA13    | 2.09E-43 | 0.251606 | 0.438 | 0.366 | 7.02E-39 | 3 | 0.371096 |
| HSPA1A    | 0        | 0.522224 | 0.48  | 0.161 | 0        | 3 | 0.183114 |
| ID2       | 0.000216 | 0.292606 | 0.339 | 0.354 | 1        | 3 | 0.353221 |
| IDS       | 2E-284   | 0.509924 | 0.624 | 0.325 | 6.8E-280 | 3 | 0.346327 |
| IER5L     | 2.14E-30 | 0.270348 | 0.471 | 0.431 | 7.16E-26 | 3 | 0.433496 |
| IFT20     | 4.67E-55 | 0.258441 | 0.524 | 0.459 | 1.57E-50 | 3 | 0.463416 |
| INA       | 0        | 1.262796 | 0.947 | 0.39  | 0        | 3 | 0.429231 |
| INAFM1    | 1.23E-63 | 0.290027 | 0.447 | 0.335 | 4.13E-59 | 3 | 0.343129 |
| ING4      | 4.66E-46 | 0.259819 | 0.556 | 0.522 | 1.56E-41 | 3 | 0.524679 |
| INPP5F    | 5.2E-111 | 0.329592 | 0.402 | 0.232 | 1.8E-106 | 3 | 0.244092 |
| IP6K2     | 1.9E-117 | 0.34017  | 0.763 | 0.719 | 6.3E-113 | 3 | 0.722149 |
| IRGQ      | 1.7E-106 | 0.322464 | 0.441 | 0.274 | 5.6E-102 | 3 | 0.285491 |
| ISLR2     | 4.4E-150 | 0.332045 | 0.346 | 0.141 | 1.5E-145 | 3 | 0.155254 |
| ITFG1     | 1.1E-118 | 0.366185 | 0.537 | 0.385 | 3.8E-114 | 3 | 0.395366 |
| ITM2B     | 2.6E-158 | 0.30791  | 0.901 | 0.881 | 8.6E-154 | 3 | 0.882271 |
| JAKMIP2   | 5.8E-111 | 0.33991  | 0.672 | 0.558 | 1.9E-106 | 3 | 0.566433 |
| JPH4      | 0        | 0.642364 | 0.707 | 0.353 | 0        | 3 | 0.378203 |
| JPT1      | 0        | 0.583981 | 0.994 | 0.986 | 0        | 3 | 0.986745 |
| JUN       | 1.18E-81 | 0.556286 | 0.704 | 0.69  | 3.97E-77 | 3 | 0.69102  |
| KALRN     | 1.1E-142 | 0.352704 | 0.421 | 0.217 | 3.6E-138 | 3 | 0.231157 |
| KBTBD6    | 2.79E-50 | 0.25476  | 0.365 | 0.265 | 9.35E-46 | 3 | 0.272201 |
| KCNC1     | 2.6E-113 | 0.272273 | 0.307 | 0.142 | 8.7E-109 | 3 | 0.154046 |
| KCNJ6     | 4.6E-177 | 0.250637 | 0.207 | 0.051 | 1.6E-172 | 3 | 0.062009 |
| KCNMA1    | 0        | 0.32235  | 0.276 | 0.052 | 0        | 3 | 0.068228 |
| KCNQ1OT1  | 3.3E-260 | 0.818163 | 0.739 | 0.448 | 1.1E-255 | 3 | 0.468356 |
| KDM5B     | 1.09E-84 | 0.278985 | 0.796 | 0.751 | 3.67E-80 | 3 | 0.754167 |
| KHDRBS3   | 6.2E-68  | 0.377651 | 0.495 | 0.371 | 2.08E-63 | 3 | 0.380086 |
| KIAA0232  | 1.47E-64 | 0.282434 | 0.513 | 0.424 | 4.93E-60 | 3 | 0.430262 |
| KIAA0895L | 4.5E-105 | 0.302853 | 0.342 | 0.179 | 1.5E-100 | 3 | 0.190221 |
| KIAA0930  | 1.9E-128 | 0.363242 | 0.459 | 0.278 | 6.5E-124 | 3 | 0.290999 |
| KIAA1109  | 2.58E-68 | 0.318093 | 0.415 | 0.295 | 8.65E-64 | 3 | 0.303543 |
| KIAA1549  | 4.3E-124 | 0.379135 | 0.471 | 0.299 | 1.4E-119 | 3 | 0.310934 |
| KIAA2026  | 3.81E-64 | 0.289213 | 0.434 | 0.325 | 1.28E-59 | 3 | 0.332255 |
| KIDINS220 | 0        | 1.046874 | 0.945 | 0.55  | 0        | 3 | 0.577876 |
| KIF1A     | 0        | 0.618314 | 0.882 | 0.717 | 0        | 3 | 0.728297 |
| KIF1B     | 1.1E-202 | 0.463681 | 0.851 | 0.799 | 3.5E-198 | 3 | 0.802352 |
| KIF21B    | 0        | 0.483492 | 0.477 | 0.12  | 0        | 3 | 0.145695 |
| KIF3A     | 0        | 0.697217 | 0.845 | 0.573 | 0        | 3 | 0.591806 |
| KIF3B     | 2.36E-52 | 0.254255 | 0.399 | 0.295 | 7.93E-48 | 3 | 0.302654 |
| KIF3C     | 3E-283   | 0.474924 | 0.557 | 0.252 | 1E-278   | 3 | 0.273871 |

|           |          |          |       |       |          |   |          |
|-----------|----------|----------|-------|-------|----------|---|----------|
| KIF5A     | 5.6E-290 | 0.534593 | 0.588 | 0.288 | 1.9E-285 | 3 | 0.308802 |
| KIF5C     | 0        | 1.103487 | 0.969 | 0.609 | 0        | 3 | 0.634093 |
| KIFAP3    | 0        | 0.664364 | 0.779 | 0.45  | 0        | 3 | 0.473544 |
| KIFC2     | 2.5E-140 | 0.266711 | 0.285 | 0.111 | 8.3E-136 | 3 | 0.122846 |
| KIRREL3   | 0        | 0.287089 | 0.206 | 0.011 | 0        | 3 | 0.025159 |
| KLC1      | 0        | 0.66077  | 0.817 | 0.54  | 0        | 3 | 0.559397 |
| KLF6      | 5.6E-43  | 0.320483 | 0.512 | 0.46  | 1.88E-38 | 3 | 0.463736 |
| KLF7      | 3.6E-204 | 0.388004 | 0.47  | 0.213 | 1.2E-199 | 3 | 0.231086 |
| KMT2E     | 7E-291   | 0.503407 | 0.895 | 0.813 | 2.3E-286 | 3 | 0.819232 |
| KMT5B     | 9.3E-122 | 0.37366  | 0.63  | 0.513 | 3.1E-117 | 3 | 0.521588 |
| KPNA5     | 9.57E-47 | 0.256465 | 0.409 | 0.323 | 3.21E-42 | 3 | 0.329342 |
| L1CAM     | 0        | 0.61482  | 0.552 | 0.122 | 0        | 3 | 0.151914 |
| LBH       | 4.18E-67 | 0.277326 | 0.45  | 0.326 | 1.4E-62  | 3 | 0.334565 |
| LCOR      | 2.46E-79 | 0.315925 | 0.584 | 0.495 | 8.26E-75 | 3 | 0.501084 |
| LDOC1     | 1E-100   | 0.345247 | 0.571 | 0.443 | 3.47E-96 | 3 | 0.452436 |
| LHFPL6    | 1.4E-121 | 0.362455 | 0.33  | 0.147 | 4.8E-117 | 3 | 0.15998  |
| LHX5      | 0        | 0.275859 | 0.149 | 0.003 | 0        | 3 | 0.013255 |
| LHX5-AS1  | 0        | 0.404424 | 0.182 | 0.004 | 0        | 3 | 0.016666 |
| LHX9      | 7.1E-164 | 0.391954 | 0.234 | 0.067 | 2.4E-159 | 3 | 0.07896  |
| LIN7B     | 3.5E-187 | 0.355506 | 0.389 | 0.167 | 1.2E-182 | 3 | 0.182367 |
| LIN7C     | 8E-151   | 0.379674 | 0.466 | 0.267 | 2.7E-146 | 3 | 0.281013 |
| LINC00632 | 7.9E-130 | 0.399201 | 0.508 | 0.337 | 2.6E-125 | 3 | 0.348815 |
| LINC01122 | 2.3E-134 | 0.289758 | 0.299 | 0.122 | 7.7E-130 | 3 | 0.134928 |
| LINGO1    | 0        | 0.66035  | 0.623 | 0.168 | 0        | 3 | 0.200171 |
| LMO2      | 3.72E-93 | 0.35572  | 0.331 | 0.176 | 1.25E-88 | 3 | 0.187129 |
| LMO3      | 2.3E-114 | 0.448536 | 0.286 | 0.124 | 7.9E-110 | 3 | 0.135638 |
| LMO4      | 3.2E-149 | 0.942249 | 0.626 | 0.453 | 1.1E-144 | 3 | 0.465406 |
| LMTK3     | 1.3E-163 | 0.250847 | 0.252 | 0.08  | 4.5E-159 | 3 | 0.091823 |
| LNPK      | 1.82E-83 | 0.359189 | 0.385 | 0.247 | 6.11E-79 | 3 | 0.257205 |
| LONRF2    | 4.94E-66 | 0.256608 | 0.329 | 0.205 | 1.66E-61 | 3 | 0.213816 |
| LRCH2     | 5.4E-101 | 0.307981 | 0.463 | 0.296 | 1.8E-96  | 3 | 0.30802  |
| LRFN5     | 0        | 0.25256  | 0.173 | 0.016 | 0        | 3 | 0.027398 |
| LRIF1     | 2.05E-59 | 0.27311  | 0.473 | 0.38  | 6.88E-55 | 3 | 0.386163 |
| LRP1      | 4.6E-85  | 0.325631 | 0.487 | 0.357 | 1.54E-80 | 3 | 0.366085 |
| LRP12     | 1.64E-83 | 0.28494  | 0.371 | 0.226 | 5.51E-79 | 3 | 0.235955 |
| LRRC24    | 8.7E-208 | 0.381908 | 0.425 | 0.183 | 2.9E-203 | 3 | 0.199602 |
| LRRC4C    | 0        | 0.498869 | 0.37  | 0.076 | 0        | 3 | 0.096727 |
| LRRC7     | 0        | 0.312448 | 0.287 | 0.061 | 0        | 3 | 0.076934 |
| LRRN3     | 8.2E-284 | 0.434997 | 0.268 | 0.058 | 2.7E-279 | 3 | 0.073132 |
| LSAMP     | 3.84E-25 | 0.371113 | 0.42  | 0.395 | 1.29E-20 | 3 | 0.396717 |
| LUC7L3    | 1.3E-114 | 0.303037 | 0.955 | 0.959 | 4.3E-110 | 3 | 0.958495 |
| LY6H      | 0        | 0.958036 | 0.86  | 0.508 | 0        | 3 | 0.532959 |
| MAB21L1   | 0        | 1.347914 | 0.538 | 0.007 | 0        | 3 | 0.044739 |
| MACF1     | 1.6E-158 | 0.425711 | 0.777 | 0.694 | 5.4E-154 | 3 | 0.699691 |
| MACO1     | 3E-176   | 0.410052 | 0.592 | 0.377 | 9.9E-172 | 3 | 0.39231  |
| MAFB      | 0        | 0.656741 | 0.296 | 0.063 | 0        | 3 | 0.079102 |
| MAGEH1    | 3.4E-190 | 0.489757 | 0.685 | 0.523 | 1.1E-185 | 3 | 0.53438  |
| MAGI2     | 3.5E-118 | 0.325663 | 0.369 | 0.192 | 1.2E-113 | 3 | 0.204755 |

|           |          |          |       |       |          |   |          |
|-----------|----------|----------|-------|-------|----------|---|----------|
| MALAT1    | 0        | 0.645295 | 1     | 0.999 | 0        | 3 | 0.999325 |
| MAP1B     | 0        | 0.608901 | 1     | 0.996 | 0        | 3 | 0.996304 |
| MAP1LC3A  | 0        | 0.852156 | 0.88  | 0.605 | 0        | 3 | 0.62464  |
| MAP1LC3B  | 2E-144   | 0.366673 | 0.814 | 0.775 | 6.8E-140 | 3 | 0.777975 |
| MAP2      | 0        | 0.989444 | 0.973 | 0.748 | 0        | 3 | 0.763903 |
| MAP4      | 1.7E-104 | 0.353839 | 0.664 | 0.591 | 5.9E-100 | 3 | 0.595857 |
| MAP4K4    | 3.1E-150 | 0.33325  | 0.86  | 0.788 | 1E-145   | 3 | 0.793184 |
| MAP6      | 0        | 0.729959 | 0.802 | 0.502 | 0        | 3 | 0.52276  |
| MAP7D1    | 6.69E-60 | 0.263393 | 0.551 | 0.479 | 2.24E-55 | 3 | 0.484098 |
| MAPK10    | 5.5E-182 | 0.466211 | 0.591 | 0.383 | 1.8E-177 | 3 | 0.397854 |
| MAPK6     | 1.06E-66 | 0.285184 | 0.528 | 0.437 | 3.56E-62 | 3 | 0.443339 |
| MAPK8     | 4.4E-101 | 0.324158 | 0.555 | 0.407 | 1.47E-96 | 3 | 0.417647 |
| MAPK8IP2  | 2.9E-114 | 0.324098 | 0.476 | 0.297 | 9.6E-110 | 3 | 0.309797 |
| MAPRE2    | 1.4E-130 | 0.36107  | 0.501 | 0.324 | 4.6E-126 | 3 | 0.336697 |
| MAPRE3    | 0        | 0.587489 | 0.653 | 0.322 | 0        | 3 | 0.345368 |
| MAPT      | 0        | 1.351958 | 0.915 | 0.229 | 0        | 3 | 0.277069 |
| MARCKSL1  | 0        | 0.446192 | 0.993 | 0.997 | 0        | 3 | 0.99666  |
| MAST1     | 4.6E-128 | 0.297799 | 0.348 | 0.165 | 1.6E-123 | 3 | 0.17757  |
| MEAF6     | 3.2E-244 | 0.467877 | 0.862 | 0.82  | 1.1E-239 | 3 | 0.823176 |
| MED10     | 9.47E-60 | 0.255444 | 0.668 | 0.663 | 3.18E-55 | 3 | 0.663338 |
| MEF2C     | 0        | 0.478627 | 0.328 | 0.077 | 0        | 3 | 0.094382 |
| MEIS1     | 0        | 0.769432 | 0.485 | 0.051 | 0        | 3 | 0.081625 |
| MEIS2     | 0        | 1.598266 | 0.795 | 0.666 | 0        | 3 | 0.675456 |
| MEIS3     | 1.54E-94 | 0.307818 | 0.667 | 0.571 | 5.18E-90 | 3 | 0.578089 |
| MEST      | 2.8E-113 | 0.31707  | 0.468 | 0.269 | 9.5E-109 | 3 | 0.283359 |
| MGAT4C    | 0        | 0.2547   | 0.16  | 0.008 | 0        | 3 | 0.018798 |
| MGST3     | 4.7E-307 | 0.467847 | 0.955 | 0.929 | 1.6E-302 | 3 | 0.930919 |
| MIAT      | 0        | 0.707847 | 0.733 | 0.349 | 0        | 3 | 0.376035 |
| MICAL3    | 1.7E-100 | 0.306193 | 0.364 | 0.207 | 5.59E-96 | 3 | 0.217832 |
| MICU3     | 5.2E-106 | 0.323571 | 0.434 | 0.276 | 1.8E-101 | 3 | 0.28677  |
| MIR124-2H | 3.07E-87 | 0.321051 | 0.366 | 0.22  | 1.03E-82 | 3 | 0.230091 |
| MIR7-3HG  | 0        | 0.41702  | 0.274 | 0.016 | 0        | 3 | 0.034007 |
| MKRN1     | 5.62E-53 | 0.259249 | 0.65  | 0.646 | 1.89E-48 | 3 | 0.646281 |
| MLLT11    | 0        | 0.782445 | 0.973 | 0.826 | 0        | 3 | 0.836751 |
| MLLT3     | 5.5E-108 | 0.368687 | 0.448 | 0.28  | 1.8E-103 | 3 | 0.291603 |
| MMD       | 1.08E-65 | 0.291221 | 0.458 | 0.354 | 3.61E-61 | 3 | 0.361572 |
| MMP17     | 1.2E-120 | 0.335761 | 0.302 | 0.136 | 4.1E-116 | 3 | 0.147791 |
| MOAP1     | 4.3E-101 | 0.348887 | 0.541 | 0.412 | 1.43E-96 | 3 | 0.421485 |
| MORF4L2   | 6.3E-175 | 0.366482 | 0.897 | 0.884 | 2.1E-170 | 3 | 0.884652 |
| MOSMO     | 8.7E-76  | 0.277288 | 0.396 | 0.266 | 2.92E-71 | 3 | 0.274759 |
| MPC1      | 6.39E-47 | 0.250101 | 0.547 | 0.5   | 2.14E-42 | 3 | 0.503109 |
| MPHOSPH8  | 8.49E-95 | 0.328008 | 0.776 | 0.752 | 2.85E-90 | 3 | 0.753278 |
| MRAS      | 5.2E-118 | 0.281414 | 0.346 | 0.17  | 1.7E-113 | 3 | 0.182083 |
| MT-ND2    | 7.1E-296 | 0.532423 | 0.985 | 0.982 | 2.4E-291 | 3 | 0.982339 |
| MT-ND4    | 2E-162   | 0.27536  | 0.993 | 0.991 | 6.8E-158 | 3 | 0.990903 |
| MT-ND5    | 1.6E-225 | 0.446593 | 0.965 | 0.964 | 5.2E-221 | 3 | 0.96418  |
| MTMR4     | 4.46E-63 | 0.29643  | 0.536 | 0.451 | 1.5E-58  | 3 | 0.456878 |
| MTMR9     | 3.66E-69 | 0.289745 | 0.435 | 0.317 | 1.23E-64 | 3 | 0.325362 |

|         |          |          |       |       |          |   |          |
|---------|----------|----------|-------|-------|----------|---|----------|
| MTSS1   | 4.8E-229 | 0.502552 | 0.55  | 0.29  | 1.6E-224 | 3 | 0.308695 |
| MTUS1   | 5.26E-64 | 0.269437 | 0.365 | 0.245 | 1.76E-59 | 3 | 0.253189 |
| MTX2    | 1.9E-156 | 0.408186 | 0.725 | 0.632 | 6.4E-152 | 3 | 0.638712 |
| MUM1    | 4.37E-67 | 0.298017 | 0.567 | 0.498 | 1.47E-62 | 3 | 0.502896 |
| MVB12B  | 3.2E-237 | 0.383306 | 0.382 | 0.138 | 1.1E-232 | 3 | 0.155609 |
| MYCBP2  | 0        | 0.708626 | 0.782 | 0.52  | 0        | 3 | 0.538787 |
| MYL12B  | 2.7E-186 | 0.353394 | 0.928 | 0.922 | 9.1E-182 | 3 | 0.922675 |
| MYO5A   | 1.6E-203 | 0.428741 | 0.47  | 0.228 | 5.2E-199 | 3 | 0.24491  |
| MYT1L   | 0        | 0.704306 | 0.625 | 0.147 | 0        | 3 | 0.180946 |
| N4BP2   | 9.7E-53  | 0.281536 | 0.535 | 0.477 | 3.25E-48 | 3 | 0.481539 |
| N4BP2L2 | 4.76E-64 | 0.27026  | 0.762 | 0.779 | 1.6E-59  | 3 | 0.777762 |
| NAGK    | 6.39E-60 | 0.283377 | 0.464 | 0.373 | 2.14E-55 | 3 | 0.379837 |
| NAP1L3  | 0        | 0.68373  | 0.623 | 0.281 | 0        | 3 | 0.305177 |
| NAP1L5  | 1.3E-191 | 0.334062 | 0.397 | 0.167 | 4.3E-187 | 3 | 0.183149 |
| NAV1    | 1.15E-96 | 0.327376 | 0.63  | 0.506 | 3.85E-92 | 3 | 0.5148   |
| NAV3    | 0        | 0.350392 | 0.31  | 0.064 | 0        | 3 | 0.081163 |
| NBDY    | 1.7E-106 | 0.317591 | 0.781 | 0.765 | 5.7E-102 | 3 | 0.765822 |
| NBEA    | 0        | 0.60174  | 0.642 | 0.299 | 0        | 3 | 0.322839 |
| NCAM1   | 0        | 0.940469 | 0.922 | 0.631 | 0        | 3 | 0.651114 |
| NCS1    | 1.8E-249 | 0.503067 | 0.646 | 0.388 | 6.2E-245 | 3 | 0.40656  |
| NDFIP1  | 0        | 0.710471 | 0.909 | 0.74  | 0        | 3 | 0.752105 |
| NDN     | 0        | 0.560091 | 0.899 | 0.818 | 0        | 3 | 0.823745 |
| NDRG4   | 0        | 0.431337 | 0.411 | 0.117 | 0        | 3 | 0.137913 |
| NDUFA5  | 1.3E-292 | 0.492886 | 0.916 | 0.876 | 4.2E-288 | 3 | 0.87854  |
| NECAP1  | 1.5E-219 | 0.460577 | 0.526 | 0.277 | 5E-215   | 3 | 0.294624 |
| NEDD4L  | 2E-180   | 0.466681 | 0.627 | 0.437 | 6.7E-176 | 3 | 0.450659 |
| NEFL    | 0        | 0.743356 | 0.382 | 0.066 | 0        | 3 | 0.088625 |
| NEFM    | 2.9E-284 | 0.756761 | 0.37  | 0.108 | 9.6E-280 | 3 | 0.126222 |
| NEGR1   | 0        | 0.324685 | 0.232 | 0.038 | 0        | 3 | 0.051882 |
| NEO1    | 5.5E-76  | 0.289605 | 0.42  | 0.283 | 1.85E-71 | 3 | 0.292562 |
| NEXMIF  | 6.2E-93  | 0.347335 | 0.483 | 0.34  | 2.08E-88 | 3 | 0.350378 |
| NFASC   | 1.1E-148 | 0.34691  | 0.457 | 0.232 | 3.7E-144 | 3 | 0.248214 |
| NKAIN1  | 1.07E-74 | 0.288983 | 0.482 | 0.353 | 3.58E-70 | 3 | 0.362389 |
| NLGN4X  | 1.09E-55 | 0.273434 | 0.343 | 0.234 | 3.66E-51 | 3 | 0.241463 |
| NLRP1   | 0        | 0.817736 | 0.903 | 0.687 | 0        | 3 | 0.701858 |
| NMNAT2  | 2.7E-182 | 0.278313 | 0.331 | 0.119 | 9.1E-178 | 3 | 0.134039 |
| NNAT    | 0        | 1.661849 | 0.975 | 0.639 | 0        | 3 | 0.662805 |
| NOL4    | 0        | 0.734301 | 0.608 | 0.151 | 0        | 3 | 0.183043 |
| NORAD   | 2.4E-99  | 0.347067 | 0.657 | 0.574 | 8.07E-95 | 3 | 0.580043 |
| NOVA1   | 6.4E-245 | 0.696952 | 0.707 | 0.531 | 2.2E-240 | 3 | 0.543051 |
| NOVA2   | 1.7E-132 | 0.365521 | 0.581 | 0.408 | 5.6E-128 | 3 | 0.420667 |
| NPDC1   | 1.1E-209 | 0.448716 | 0.836 | 0.752 | 3.7E-205 | 3 | 0.757791 |
| NR2F1   | 0.000287 | 0.401274 | 0.569 | 0.774 | 1        | 3 | 0.75907  |
| NR2F2   | 0        | 1.314595 | 0.777 | 0.374 | 0        | 3 | 0.402686 |
| NRCAM   | 1.7E-141 | 0.322452 | 0.419 | 0.196 | 5.8E-137 | 3 | 0.212146 |
| NREP    | 0        | 0.787154 | 0.969 | 0.908 | 0        | 3 | 0.912405 |
| NRGN    | 2.3E-164 | 0.606899 | 0.338 | 0.144 | 7.8E-160 | 3 | 0.157848 |
| NRIP1   | 9.23E-92 | 0.510529 | 0.465 | 0.342 | 3.1E-87  | 3 | 0.350485 |

|           |          |          |       |       |          |   |          |
|-----------|----------|----------|-------|-------|----------|---|----------|
| NRN1      | 4.2E-233 | 0.522833 | 0.417 | 0.149 | 1.4E-228 | 3 | 0.16762  |
| NRP2      | 0        | 0.973194 | 0.635 | 0.114 | 0        | 3 | 0.15067  |
| NRXN1     | 0        | 0.889983 | 0.849 | 0.341 | 0        | 3 | 0.376888 |
| NRXN2     | 8.7E-277 | 0.596037 | 0.676 | 0.427 | 2.9E-272 | 3 | 0.444902 |
| NRXN3     | 1.7E-149 | 0.268259 | 0.181 | 0.047 | 5.7E-145 | 3 | 0.056359 |
| NSD3      | 0        | 0.567741 | 0.94  | 0.898 | 0        | 3 | 0.90107  |
| NSF       | 1.95E-64 | 0.25499  | 0.338 | 0.217 | 6.55E-60 | 3 | 0.225685 |
| NSG1      | 0        | 0.995799 | 0.969 | 0.712 | 0        | 3 | 0.730642 |
| NSG2      | 0        | 1.333166 | 0.941 | 0.205 | 0        | 3 | 0.257382 |
| NTM       | 0        | 1.365257 | 0.742 | 0.063 | 0        | 3 | 0.111297 |
| NTRK2     | 0        | 0.303268 | 0.288 | 0.05  | 0        | 3 | 0.066735 |
| NUDT14    | 5.13E-50 | 0.261127 | 0.443 | 0.353 | 1.72E-45 | 3 | 0.359724 |
| NUDT3     | 8.5E-167 | 0.442215 | 0.723 | 0.6   | 2.8E-162 | 3 | 0.608756 |
| NUP93     | 2.2E-120 | 0.373257 | 0.544 | 0.381 | 7.5E-116 | 3 | 0.39231  |
| OCIAD1    | 2E-232   | 0.435955 | 0.894 | 0.854 | 6.6E-228 | 3 | 0.857183 |
| OCIAD2    | 0        | 0.640098 | 0.852 | 0.624 | 0        | 3 | 0.640205 |
| ODF2L     | 5.7E-156 | 0.426776 | 0.65  | 0.505 | 1.9E-151 | 3 | 0.515618 |
| OGA       | 6.27E-57 | 0.279686 | 0.627 | 0.599 | 2.1E-52  | 3 | 0.600725 |
| OLFM1     | 0        | 0.814136 | 0.765 | 0.453 | 0        | 3 | 0.475392 |
| OLFM2     | 0        | 0.690574 | 0.783 | 0.357 | 0        | 3 | 0.387335 |
| OPCML     | 0        | 0.479243 | 0.357 | 0.052 | 0        | 3 | 0.0737   |
| OPTN      | 0        | 0.605002 | 0.63  | 0.236 | 0        | 3 | 0.264241 |
| OSBPL8    | 4.38E-44 | 0.252855 | 0.668 | 0.673 | 1.47E-39 | 3 | 0.672897 |
| OTUD6B-AS | 1.25E-60 | 0.275205 | 0.574 | 0.516 | 4.19E-56 | 3 | 0.520166 |
| P4HTM     | 1.61E-64 | 0.271093 | 0.438 | 0.324 | 5.41E-60 | 3 | 0.332255 |
| PAFAH1B1  | 2.2E-144 | 0.386216 | 0.803 | 0.775 | 7.5E-140 | 3 | 0.776909 |
| PAFAH1B3  | 0        | 0.485237 | 0.975 | 0.974 | 0        | 3 | 0.974379 |
| PAK3      | 0        | 1.239992 | 0.933 | 0.494 | 0        | 3 | 0.524715 |
| PAK5      | 0        | 0.519867 | 0.539 | 0.183 | 0        | 3 | 0.20845  |
| PAPPA2    | 1.1E-158 | 0.723031 | 0.238 | 0.077 | 3.6E-154 | 3 | 0.08827  |
| PARP6     | 8.4E-144 | 0.316945 | 0.406 | 0.199 | 2.8E-139 | 3 | 0.213852 |
| PBRM1     | 2.19E-66 | 0.285901 | 0.643 | 0.599 | 7.36E-62 | 3 | 0.601649 |
| PBX1      | 0        | 0.849881 | 0.811 | 0.676 | 0        | 3 | 0.68569  |
| PBX3      | 0        | 2.043169 | 0.776 | 0.29  | 0        | 3 | 0.324509 |
| PCDH11X   | 0        | 0.802618 | 0.39  | 0.044 | 0        | 3 | 0.068192 |
| PCDH17    | 2.1E-223 | 0.477356 | 0.279 | 0.079 | 6.9E-219 | 3 | 0.092854 |
| PCDH7     | 1.6E-280 | 0.415616 | 0.281 | 0.065 | 5.5E-276 | 3 | 0.080523 |
| PCLO      | 0        | 0.642515 | 0.568 | 0.194 | 0        | 3 | 0.220426 |
| PCMT1     | 6.3E-152 | 0.368599 | 0.826 | 0.795 | 2.1E-147 | 3 | 0.79688  |
| PCNX4     | 2.86E-32 | 0.256118 | 0.544 | 0.538 | 9.6E-28  | 3 | 0.538396 |
| PCSK1N    | 0        | 1.283234 | 0.994 | 0.86  | 0        | 3 | 0.869408 |
| PCSK2     | 0        | 0.763282 | 0.466 | 0.083 | 0        | 3 | 0.109911 |
| PDE4DIP   | 1.8E-269 | 0.45583  | 0.453 | 0.173 | 6.1E-265 | 3 | 0.192353 |
| PDPK1     | 9.6E-59  | 0.266528 | 0.427 | 0.327 | 3.22E-54 | 3 | 0.333783 |
| PDS5B     | 1.87E-32 | 0.253959 | 0.475 | 0.444 | 6.27E-28 | 3 | 0.446395 |
| PDZD4     | 2.72E-80 | 0.269849 | 0.338 | 0.197 | 9.14E-76 | 3 | 0.206993 |
| PEG10     | 0        | 0.960129 | 0.919 | 0.867 | 0        | 3 | 0.87026  |
| PFDN2     | 1.3E-269 | 0.437325 | 0.931 | 0.91  | 4.5E-265 | 3 | 0.911908 |



|          |          |          |       |       |          |   |          |
|----------|----------|----------|-------|-------|----------|---|----------|
| PGM2L1   | 0        | 1.148099 | 0.883 | 0.391 | 0        | 3 | 0.426104 |
| PGRMC1   | 0        | 0.498193 | 0.966 | 0.946 | 0        | 3 | 0.947123 |
| PHYHIPL  | 1E-294   | 0.463222 | 0.488 | 0.191 | 3.4E-290 | 3 | 0.21172  |
| PIK3R1   | 2.7E-111 | 0.404991 | 0.486 | 0.325 | 9.2E-107 | 3 | 0.336058 |
| PIK3R3   | 1.47E-72 | 0.288966 | 0.488 | 0.37  | 4.92E-68 | 3 | 0.378451 |
| PINK1    | 1.06E-88 | 0.297419 | 0.464 | 0.321 | 3.57E-84 | 3 | 0.330976 |
| PIP4K2B  | 3.04E-75 | 0.285637 | 0.423 | 0.295 | 1.02E-70 | 3 | 0.304183 |
| PIP4P2   | 1.84E-67 | 0.266546 | 0.375 | 0.253 | 6.18E-63 | 3 | 0.261718 |
| PITHD1   | 1.6E-112 | 0.355097 | 0.659 | 0.576 | 5.4E-108 | 3 | 0.581607 |
| PJA2     | 2.4E-301 | 0.603859 | 0.784 | 0.575 | 8.2E-297 | 3 | 0.590206 |
| PKIA     | 0        | 1.0554   | 0.894 | 0.557 | 0        | 3 | 0.580719 |
| PLD3     | 1.3E-289 | 0.544886 | 0.857 | 0.72  | 4.2E-285 | 3 | 0.729967 |
| PLEKHA1  | 2.32E-89 | 0.31598  | 0.474 | 0.34  | 7.78E-85 | 3 | 0.349561 |
| PLK2     | 0        | 0.59527  | 0.503 | 0.139 | 0        | 3 | 0.165062 |
| PLPPR1   | 2.7E-219 | 0.342444 | 0.365 | 0.124 | 9E-215   | 3 | 0.141289 |
| PLPPR2   | 0        | 0.515409 | 0.58  | 0.238 | 0        | 3 | 0.262606 |
| PLPPR3   | 5.8E-228 | 0.447327 | 0.902 | 0.862 | 2E-223   | 3 | 0.864895 |
| PLXNA1   | 1.03E-48 | 0.264403 | 0.344 | 0.245 | 3.46E-44 | 3 | 0.252123 |
| PLXNA2   | 1.1E-102 | 0.292157 | 0.35  | 0.168 | 3.62E-98 | 3 | 0.180839 |
| PLXNC1   | 1.9E-257 | 0.285786 | 0.232 | 0.049 | 6.2E-253 | 3 | 0.06176  |
| PMEPA1   | 3.03E-39 | 0.252071 | 0.47  | 0.417 | 1.02E-34 | 3 | 0.421023 |
| PNCK     | 6.7E-293 | 0.321735 | 0.256 | 0.052 | 2.2E-288 | 3 | 0.066842 |
| PNMA2    | 6.1E-63  | 0.279927 | 0.491 | 0.395 | 2.05E-58 | 3 | 0.401656 |
| PNPLA8   | 2.16E-94 | 0.31637  | 0.507 | 0.363 | 7.23E-90 | 3 | 0.373334 |
| PODXL2   | 0        | 0.637583 | 0.892 | 0.709 | 0        | 3 | 0.722043 |
| POU2F2   | 0        | 0.661782 | 0.55  | 0.163 | 0        | 3 | 0.190327 |
| PPFIA2   | 0        | 0.453131 | 0.437 | 0.134 | 0        | 3 | 0.155467 |
| PPFIBP1  | 2.3E-172 | 0.407693 | 0.442 | 0.229 | 7.8E-168 | 3 | 0.244128 |
| PPM1K    | 6E-227   | 0.446013 | 0.46  | 0.207 | 2E-222   | 3 | 0.22501  |
| PPP1R14C | 0        | 0.555627 | 0.379 | 0.021 | 0        | 3 | 0.046622 |
| PPP1R15A | 4.51E-67 | 0.289363 | 0.443 | 0.322 | 1.51E-62 | 3 | 0.330265 |
| PPP1R1A  | 0        | 0.625659 | 0.592 | 0.218 | 0        | 3 | 0.24395  |
| PPP1R2   | 1.65E-53 | 0.258903 | 0.567 | 0.529 | 5.53E-49 | 3 | 0.531715 |
| PPP1R9A  | 2.77E-96 | 0.342804 | 0.398 | 0.243 | 9.28E-92 | 3 | 0.253758 |
| PPP2R2B  | 0        | 0.675941 | 0.698 | 0.326 | 0        | 3 | 0.352475 |
| PPP3CA   | 1.82E-61 | 0.284707 | 0.537 | 0.44  | 6.12E-57 | 3 | 0.446999 |
| PPP3CB   | 1.1E-128 | 0.357825 | 0.518 | 0.342 | 3.5E-124 | 3 | 0.354785 |
| PRDM2    | 1.27E-54 | 0.281458 | 0.515 | 0.444 | 4.27E-50 | 3 | 0.449131 |
| PRDX5    | 7.7E-214 | 0.353219 | 0.963 | 0.973 | 2.6E-209 | 3 | 0.972211 |
| PREPL    | 1.3E-128 | 0.359133 | 0.495 | 0.318 | 4.3E-124 | 3 | 0.330976 |
| PRKACB   | 1.3E-141 | 0.379503 | 0.454 | 0.257 | 4.5E-137 | 3 | 0.270921 |
| PRKAR2A  | 5.55E-81 | 0.338695 | 0.565 | 0.474 | 1.86E-76 | 3 | 0.480687 |
| PRKAR2B  | 0        | 0.693654 | 0.721 | 0.37  | 0        | 3 | 0.394407 |
| PRKCZ    | 1.64E-93 | 0.271105 | 0.383 | 0.223 | 5.5E-89  | 3 | 0.234782 |
| PRMT2    | 1.2E-191 | 0.451204 | 0.764 | 0.646 | 4.1E-187 | 3 | 0.654348 |
| PRNP     | 9.53E-72 | 0.255985 | 0.398 | 0.261 | 3.2E-67  | 3 | 0.270637 |
| PRRC2B   | 5.6E-119 | 0.343021 | 0.762 | 0.726 | 1.9E-114 | 3 | 0.728546 |
| PSD      | 1.4E-236 | 0.376486 | 0.367 | 0.126 | 4.7E-232 | 3 | 0.142781 |

|          |          |          |       |       |          |   |          |
|----------|----------|----------|-------|-------|----------|---|----------|
| PTPRD    | 0        | 0.533327 | 0.454 | 0.139 | 0        | 3 | 0.161011 |
| PTPRN    | 0        | 0.289872 | 0.264 | 0.047 | 0        | 3 | 0.062116 |
| PTS      | 8.65E-53 | 0.269397 | 0.545 | 0.502 | 2.9E-48  | 3 | 0.504602 |
| PWAR6    | 7E-259   | 0.527808 | 0.567 | 0.294 | 2.4E-254 | 3 | 0.31367  |
| RAB11B   | 2E-115   | 0.34062  | 0.708 | 0.636 | 6.9E-111 | 3 | 0.641306 |
| RAB14    | 6E-187   | 0.434367 | 0.764 | 0.663 | 2E-182   | 3 | 0.670445 |
| RAB18    | 1.9E-103 | 0.3285   | 0.653 | 0.569 | 6.3E-99  | 3 | 0.575282 |
| RAB1A    | 1.03E-63 | 0.269201 | 0.641 | 0.615 | 3.45E-59 | 3 | 0.616432 |
| RAB2A    | 0        | 0.502305 | 0.923 | 0.88  | 0        | 3 | 0.882947 |
| RAB33A   | 0        | 0.520372 | 0.584 | 0.243 | 0        | 3 | 0.26751  |
| RAB3A    | 0        | 0.79232  | 0.796 | 0.251 | 0        | 3 | 0.28908  |
| RAB3C    | 1.8E-287 | 0.403663 | 0.355 | 0.104 | 6.2E-283 | 3 | 0.12146  |
| RAB6A    | 2.3E-192 | 0.45404  | 0.645 | 0.452 | 7.6E-188 | 3 | 0.465371 |
| RAB6B    | 3.89E-73 | 0.288399 | 0.44  | 0.319 | 1.3E-68  | 3 | 0.327529 |
| RAB7A    | 3.48E-79 | 0.294696 | 0.654 | 0.606 | 1.17E-74 | 3 | 0.609467 |
| RAB9B    | 9.5E-179 | 0.338349 | 0.375 | 0.159 | 3.2E-174 | 3 | 0.174656 |
| RABEP1   | 1.8E-122 | 0.356343 | 0.657 | 0.543 | 5.9E-118 | 3 | 0.55094  |
| RABGAP1L | 3.2E-173 | 0.309898 | 0.325 | 0.125 | 1.1E-168 | 3 | 0.139334 |
| RAC3     | 2.34E-62 | 0.269834 | 0.748 | 0.762 | 7.84E-58 | 3 | 0.761238 |
| RALGDS   | 7.51E-57 | 0.256636 | 0.45  | 0.351 | 2.52E-52 | 3 | 0.357983 |
| RALYL    | 5.45E-84 | 0.256235 | 0.257 | 0.111 | 1.83E-79 | 3 | 0.121673 |
| RASAL2   | 5E-119   | 0.400703 | 0.521 | 0.367 | 1.7E-114 | 3 | 0.378309 |
| RBFOX1   | 0        | 0.292427 | 0.187 | 0.022 | 0        | 3 | 0.03351  |
| RBFOX2   | 0        | 1.0435   | 0.938 | 0.551 | 0        | 3 | 0.578409 |
| REEP1    | 0        | 0.64635  | 0.588 | 0.167 | 0        | 3 | 0.196759 |
| REEP2    | 1.09E-90 | 0.287373 | 0.474 | 0.327 | 3.66E-86 | 3 | 0.337266 |
| RELN     | 1.5E-201 | 0.411435 | 0.227 | 0.055 | 5E-197   | 3 | 0.067624 |
| RERE     | 3.1E-126 | 0.393409 | 0.745 | 0.693 | 1E-121   | 3 | 0.696777 |
| RETREG2  | 1.82E-66 | 0.284109 | 0.511 | 0.421 | 6.12E-62 | 3 | 0.427064 |
| RFK      | 4.81E-86 | 0.314873 | 0.584 | 0.497 | 1.61E-81 | 3 | 0.503003 |
| RGMA     | 1.08E-63 | 0.408552 | 0.444 | 0.345 | 3.63E-59 | 3 | 0.351551 |
| RGS17    | 4.1E-294 | 0.513678 | 0.517 | 0.207 | 1.4E-289 | 3 | 0.228777 |
| RHOB     | 3.46E-53 | 0.271099 | 0.462 | 0.372 | 1.16E-48 | 3 | 0.378274 |
| RIC3     | 0        | 0.583409 | 0.501 | 0.095 | 0        | 3 | 0.123556 |
| RIMS1    | 2.6E-277 | 0.292513 | 0.27  | 0.061 | 8.7E-273 | 3 | 0.075655 |
| RIMS2    | 0        | 0.7232   | 0.495 | 0.096 | 0        | 3 | 0.124196 |
| RIPOR2   | 0        | 0.402332 | 0.326 | 0.057 | 0        | 3 | 0.07601  |
| RND2     | 2.4E-100 | 0.308741 | 0.435 | 0.267 | 7.92E-96 | 3 | 0.278775 |
| RNF146   | 2.32E-53 | 0.264315 | 0.471 | 0.385 | 7.78E-49 | 3 | 0.391493 |
| RNF165   | 2.3E-187 | 0.478331 | 0.635 | 0.434 | 7.7E-183 | 3 | 0.448349 |
| RNF24    | 1.54E-75 | 0.290701 | 0.589 | 0.5   | 5.16E-71 | 3 | 0.506343 |
| RNF5     | 8.06E-58 | 0.256541 | 0.69  | 0.684 | 2.7E-53  | 3 | 0.68402  |
| RNMT     | 3.43E-62 | 0.269435 | 0.697 | 0.693 | 1.15E-57 | 3 | 0.693401 |
| ROGDI    | 6.7E-184 | 0.402544 | 0.594 | 0.36  | 2.3E-179 | 3 | 0.376604 |
| RPAIN    | 5.8E-258 | 0.429703 | 0.926 | 0.886 | 1.9E-253 | 3 | 0.888526 |
| RPS6KL1  | 9.1E-229 | 0.340641 | 0.355 | 0.118 | 3.1E-224 | 3 | 0.134608 |
| RRAGA    | 7.3E-99  | 0.32962  | 0.68  | 0.622 | 2.45E-94 | 3 | 0.626204 |
| RRAGB    | 2.39E-78 | 0.261788 | 0.356 | 0.219 | 8.03E-74 | 3 | 0.228848 |

|           |          |          |       |       |          |   |          |
|-----------|----------|----------|-------|-------|----------|---|----------|
| RTN1      | 0        | 1.53298  | 0.99  | 0.292 | 0        | 3 | 0.341246 |
| RTN2      | 4.5E-219 | 0.384377 | 0.513 | 0.234 | 1.5E-214 | 3 | 0.253331 |
| RTN3      | 0        | 0.549877 | 0.974 | 0.941 | 0        | 3 | 0.943143 |
| RTN4      | 0        | 0.545102 | 0.99  | 0.982 | 0        | 3 | 0.982588 |
| RUFY2     | 2.2E-213 | 0.491078 | 0.59  | 0.353 | 7.3E-209 | 3 | 0.370101 |
| RUFY3     | 0        | 0.70672  | 0.856 | 0.617 | 0        | 3 | 0.633702 |
| RUNDC3B   | 0        | 0.546184 | 0.482 | 0.088 | 0        | 3 | 0.116129 |
| RUNX1T1   | 0        | 0.736429 | 0.512 | 0.135 | 0        | 3 | 0.161686 |
| RUSC1     | 1.79E-63 | 0.279513 | 0.501 | 0.41  | 6.02E-59 | 3 | 0.416403 |
| RUSC2     | 3.1E-172 | 0.275316 | 0.286 | 0.097 | 1E-167   | 3 | 0.110266 |
| RYBP      | 6.92E-74 | 0.313228 | 0.468 | 0.356 | 2.32E-69 | 3 | 0.364095 |
| SAMD3     | 0        | 0.325432 | 0.214 | 0.015 | 0        | 3 | 0.029175 |
| SARAF     | 0        | 0.933748 | 0.983 | 0.914 | 0        | 3 | 0.918979 |
| SBK1      | 0        | 0.600711 | 0.782 | 0.54  | 0        | 3 | 0.556981 |
| SCAMP1    | 7.72E-64 | 0.302334 | 0.49  | 0.406 | 2.59E-59 | 3 | 0.411606 |
| SCAMP5    | 7.5E-142 | 0.321504 | 0.38  | 0.184 | 2.5E-137 | 3 | 0.197576 |
| SCAPER    | 5.8E-102 | 0.337788 | 0.48  | 0.331 | 1.93E-97 | 3 | 0.341139 |
| SCARB2    | 6.68E-80 | 0.303186 | 0.563 | 0.459 | 2.24E-75 | 3 | 0.466224 |
| SCD5      | 1.3E-159 | 0.417033 | 0.545 | 0.332 | 4.4E-155 | 3 | 0.347216 |
| SCG2      | 2.9E-294 | 0.885036 | 0.669 | 0.381 | 9.6E-290 | 3 | 0.40091  |
| SCG3      | 0        | 0.951973 | 0.866 | 0.247 | 0        | 3 | 0.290324 |
| SCG5      | 0        | 1.096325 | 0.574 | 0.086 | 0        | 3 | 0.120785 |
| SCN2A     | 0        | 0.57106  | 0.446 | 0.049 | 0        | 3 | 0.077147 |
| SCN3A     | 0        | 0.506443 | 0.425 | 0.058 | 0        | 3 | 0.084361 |
| SCN3B     | 0        | 0.753822 | 0.58  | 0.081 | 0        | 3 | 0.116165 |
| SCN9A     | 0        | 0.25253  | 0.189 | 0.018 | 0        | 3 | 0.030418 |
| SCOC      | 5.1E-146 | 0.370226 | 0.766 | 0.716 | 1.7E-141 | 3 | 0.71991  |
| SCRT2     | 2.2E-170 | 0.283279 | 0.352 | 0.131 | 7.4E-166 | 3 | 0.146974 |
| SDC3      | 0        | 0.736092 | 0.63  | 0.173 | 0        | 3 | 0.205501 |
| SEC11C    | 0        | 0.725202 | 0.925 | 0.712 | 0        | 3 | 0.726804 |
| SEC62     | 6.4E-277 | 0.484436 | 0.911 | 0.851 | 2.1E-272 | 3 | 0.855691 |
| SECISBP2L | 6.9E-53  | 0.25137  | 0.376 | 0.272 | 2.32E-48 | 3 | 0.279343 |
| SELENOW   | 0        | 0.559264 | 0.947 | 0.873 | 0        | 3 | 0.878149 |
| SEMA3A    | 2.4E-140 | 0.314546 | 0.291 | 0.113 | 7.9E-136 | 3 | 0.125795 |
| SENP7     | 4.05E-59 | 0.261696 | 0.378 | 0.264 | 1.36E-54 | 3 | 0.272414 |
| SERINC1   | 0        | 0.628987 | 0.731 | 0.44  | 0        | 3 | 0.460822 |
| SERINC3   | 3.37E-90 | 0.301226 | 0.439 | 0.293 | 1.13E-85 | 3 | 0.303259 |
| SERP2     | 0        | 0.580642 | 0.566 | 0.201 | 0        | 3 | 0.227142 |
| SERPINI1  | 8.57E-55 | 0.261392 | 0.303 | 0.181 | 2.88E-50 | 3 | 0.189474 |
| SESTD1    | 3.3E-184 | 0.477826 | 0.643 | 0.472 | 1.1E-179 | 3 | 0.484489 |
| SETBP1    | 2.18E-25 | 0.259858 | 0.483 | 0.468 | 7.31E-21 | 3 | 0.469386 |
| SEZ6L     | 3.89E-78 | 0.4147   | 0.368 | 0.231 | 1.3E-73  | 3 | 0.240716 |
| SEZ6L2    | 0        | 0.995161 | 0.88  | 0.265 | 0        | 3 | 0.308447 |
| SGIP1     | 0        | 0.344548 | 0.324 | 0.067 | 0        | 3 | 0.085534 |
| SH3BP5    | 0        | 0.803264 | 0.79  | 0.234 | 0        | 3 | 0.272947 |
| SH3GL3    | 3.3E-293 | 0.418481 | 0.417 | 0.14  | 1.1E-288 | 3 | 0.15934  |
| SH3GLB1   | 1.8E-103 | 0.340228 | 0.524 | 0.388 | 6E-99    | 3 | 0.397747 |
| SHISA5    | 5.54E-46 | 0.253007 | 0.492 | 0.433 | 1.86E-41 | 3 | 0.436871 |

|          |          |          |       |       |          |   |          |
|----------|----------|----------|-------|-------|----------|---|----------|
| SHTN1    | 0        | 0.586518 | 0.603 | 0.224 | 0        | 3 | 0.250524 |
| SIPA1L2  | 2.64E-39 | 0.268595 | 0.311 | 0.222 | 8.85E-35 | 3 | 0.228492 |
| SIRT2    | 8.34E-55 | 0.252293 | 0.396 | 0.293 | 2.8E-50  | 3 | 0.300487 |
| SIX3     | 4.17E-10 | 0.584774 | 0.138 | 0.218 | 1.4E-05  | 3 | 0.212004 |
| SKIL     | 2.33E-75 | 0.295854 | 0.397 | 0.264 | 7.81E-71 | 3 | 0.273231 |
| SLC12A5  | 1.8E-229 | 0.489827 | 0.553 | 0.306 | 5.9E-225 | 3 | 0.323656 |
| SLC17A6  | 0        | 0.605842 | 0.445 | 0.059 | 0        | 3 | 0.086635 |
| SLC1A2   | 3.63E-88 | 0.328999 | 0.481 | 0.331 | 1.22E-83 | 3 | 0.341957 |
| SLC1A6   | 7E-82    | 0.309886 | 0.406 | 0.267 | 2.35E-77 | 3 | 0.276998 |
| SLC22A17 | 3.5E-180 | 0.476778 | 0.679 | 0.492 | 1.2E-175 | 3 | 0.504922 |
| SLC25A4  | 2.8E-274 | 0.525308 | 0.831 | 0.701 | 9.3E-270 | 3 | 0.710387 |
| SLC38A1  | 1.7E-163 | 0.423943 | 0.753 | 0.649 | 5.6E-159 | 3 | 0.656409 |
| SLC4A8   | 8.84E-80 | 0.317722 | 0.454 | 0.321 | 2.96E-75 | 3 | 0.330834 |
| SLC8A1   | 0        | 0.54772  | 0.468 | 0.145 | 0        | 3 | 0.168118 |
| SLIT1    | 4.3E-121 | 0.253589 | 0.257 | 0.096 | 1.4E-116 | 3 | 0.106926 |
| SMAP2    | 2.2E-170 | 0.379451 | 0.482 | 0.26  | 7.4E-166 | 3 | 0.275328 |
| SMARCC2  | 2.1E-111 | 0.366737 | 0.67  | 0.595 | 7.1E-107 | 3 | 0.600583 |
| SMARCD3  | 5.3E-134 | 0.409899 | 0.617 | 0.485 | 1.8E-129 | 3 | 0.49419  |
| SMIM18   | 0        | 0.45374  | 0.409 | 0.07  | 0        | 3 | 0.093529 |
| SMIM29   | 3.1E-117 | 0.276965 | 0.346 | 0.172 | 1E-112   | 3 | 0.18386  |
| SNAP25   | 0        | 0.693039 | 0.647 | 0.158 | 0        | 3 | 0.192495 |
| SNAP91   | 2.2E-215 | 0.284555 | 0.283 | 0.081 | 7.4E-211 | 3 | 0.095128 |
| SNCA     | 2.33E-95 | 0.381924 | 0.493 | 0.331 | 7.8E-91  | 3 | 0.34288  |
| SNRPN    | 0        | 0.540807 | 0.948 | 0.919 | 0        | 3 | 0.920721 |
| SNTG1    | 0        | 0.25002  | 0.163 | 0.018 | 0        | 3 | 0.028215 |
| SNX4     | 3.47E-98 | 0.328328 | 0.522 | 0.383 | 1.16E-93 | 3 | 0.39295  |
| SOBP     | 3.5E-272 | 0.544821 | 0.534 | 0.257 | 1.2E-267 | 3 | 0.276252 |
| SOGA1    | 1.08E-76 | 0.268722 | 0.362 | 0.227 | 3.63E-72 | 3 | 0.236203 |
| SORBS2   | 0        | 0.600021 | 0.728 | 0.423 | 0        | 3 | 0.444298 |
| SOX11    | 5.8E-249 | 0.468983 | 0.961 | 0.924 | 1.9E-244 | 3 | 0.926762 |
| SOX4     | 0        | 0.695156 | 0.986 | 0.981 | 0        | 3 | 0.981735 |
| SPAST    | 3.07E-59 | 0.286595 | 0.475 | 0.381 | 1.03E-54 | 3 | 0.387904 |
| SPIN1    | 1.8E-117 | 0.369749 | 0.604 | 0.482 | 6.1E-113 | 3 | 0.490494 |
| SPINT2   | 0        | 0.628021 | 0.738 | 0.368 | 0        | 3 | 0.394229 |
| SPOCK1   | 4.4E-42  | 0.274384 | 0.289 | 0.193 | 1.48E-37 | 3 | 0.19946  |
| SPP1     | 0        | 0.279088 | 0.13  | 0.004 | 0        | 3 | 0.012686 |
| SPTAN1   | 0        | 0.645095 | 0.825 | 0.56  | 0        | 3 | 0.578373 |
| SPTBN1   | 0        | 0.749215 | 0.766 | 0.4   | 0        | 3 | 0.426104 |
| SRCIN1   | 5.8E-150 | 0.348482 | 0.389 | 0.189 | 1.9E-145 | 3 | 0.203191 |
| SRGAP1   | 4.5E-196 | 0.457268 | 0.651 | 0.423 | 1.5E-191 | 3 | 0.439288 |
| SRPK2    | 9.6E-120 | 0.337266 | 0.772 | 0.736 | 3.2E-115 | 3 | 0.738709 |
| SRRM3    | 3E-249   | 0.305184 | 0.317 | 0.089 | 1E-244   | 3 | 0.104936 |
| SRRM4    | 9.9E-214 | 0.373977 | 0.431 | 0.164 | 3.3E-209 | 3 | 0.182403 |
| SSBP2    | 4.6E-120 | 0.44042  | 0.715 | 0.643 | 1.5E-115 | 3 | 0.64852  |
| SSBP3    | 9.7E-66  | 0.313521 | 0.637 | 0.61  | 3.25E-61 | 3 | 0.612381 |
| ST3GAL5  | 1.5E-99  | 0.253565 | 0.282 | 0.131 | 5.11E-95 | 3 | 0.141928 |
| STARD3NL | 1.41E-86 | 0.30813  | 0.62  | 0.538 | 4.72E-82 | 3 | 0.543975 |
| STAU2    | 4.75E-61 | 0.279719 | 0.516 | 0.437 | 1.59E-56 | 3 | 0.442379 |

|          |          |          |       |       |          |   |          |
|----------|----------|----------|-------|-------|----------|---|----------|
| STMN1    | 0        | 0.833066 | 0.997 | 0.996 | 0        | 3 | 0.995985 |
| STMN2    | 0        | 2.113048 | 0.991 | 0.254 | 0        | 3 | 0.306315 |
| STMN3    | 8.78E-60 | 0.282332 | 0.598 | 0.552 | 2.95E-55 | 3 | 0.555702 |
| STMN4    | 0        | 1.519842 | 0.964 | 0.513 | 0        | 3 | 0.544579 |
| STOX2    | 7.85E-37 | 0.251973 | 0.483 | 0.436 | 2.63E-32 | 3 | 0.439714 |
| STRBP    | 8.14E-89 | 0.316659 | 0.708 | 0.672 | 2.73E-84 | 3 | 0.674105 |
| STX12    | 3.5E-223 | 0.470009 | 0.596 | 0.358 | 1.2E-218 | 3 | 0.374436 |
| STX7     | 4.8E-201 | 0.456549 | 0.554 | 0.322 | 1.6E-196 | 3 | 0.338581 |
| STXBP1   | 1.1E-297 | 0.52389  | 0.643 | 0.323 | 3.7E-293 | 3 | 0.345546 |
| SULT4A1  | 9.6E-134 | 0.282102 | 0.349 | 0.159 | 3.2E-129 | 3 | 0.17256  |
| SV2A     | 0        | 0.603396 | 0.644 | 0.339 | 0        | 3 | 0.360506 |
| SVBP     | 6.1E-235 | 0.484111 | 0.812 | 0.688 | 2E-230   | 3 | 0.696422 |
| SYN1     | 0        | 0.33245  | 0.306 | 0.06  | 0        | 3 | 0.077503 |
| SYNE1    | 7.8E-142 | 0.323745 | 0.327 | 0.142 | 2.6E-137 | 3 | 0.154792 |
| SYNGR3   | 9.7E-159 | 0.287701 | 0.309 | 0.117 | 3.3E-154 | 3 | 0.130806 |
| SYP      | 0        | 0.620477 | 0.672 | 0.295 | 0        | 3 | 0.321239 |
| SYT1     | 0        | 0.889775 | 0.941 | 0.695 | 0        | 3 | 0.71227  |
| SYT13    | 0        | 0.316396 | 0.28  | 0.052 | 0        | 3 | 0.068548 |
| SYT4     | 2E-209   | 0.394036 | 0.319 | 0.097 | 6.8E-205 | 3 | 0.112363 |
| SYT5     | 0        | 0.712606 | 0.628 | 0.137 | 0        | 3 | 0.1716   |
| TAC1     | 0        | 0.930405 | 0.328 | 0.004 | 0        | 3 | 0.026794 |
| TACC2    | 1.1E-169 | 0.356163 | 0.406 | 0.187 | 3.7E-165 | 3 | 0.202765 |
| TAGLN3   | 0        | 0.821685 | 0.945 | 0.525 | 0        | 3 | 0.554565 |
| TANC2    | 4.6E-255 | 0.451474 | 0.481 | 0.204 | 1.5E-250 | 3 | 0.223446 |
| TAOK1    | 2.38E-50 | 0.269276 | 0.544 | 0.493 | 7.97E-46 | 3 | 0.496713 |
| TAOK3    | 1.4E-169 | 0.443084 | 0.562 | 0.362 | 4.7E-165 | 3 | 0.376461 |
| TAX1BP1  | 6.22E-61 | 0.28671  | 0.574 | 0.514 | 2.09E-56 | 3 | 0.518496 |
| TBCB     | 9.3E-211 | 0.379275 | 0.926 | 0.917 | 3.1E-206 | 3 | 0.917274 |
| TBR1     | 1.4E-160 | 0.379946 | 0.43  | 0.184 | 4.8E-156 | 3 | 0.201023 |
| TCAF1    | 3.2E-122 | 0.368303 | 0.717 | 0.634 | 1.1E-117 | 3 | 0.64024  |
| TCEAL1   | 9.17E-65 | 0.277652 | 0.351 | 0.231 | 3.08E-60 | 3 | 0.239792 |
| TCEAL2   | 9.9E-229 | 0.525452 | 0.772 | 0.607 | 3.3E-224 | 3 | 0.618244 |
| TCEAL3   | 1.18E-91 | 0.340027 | 0.673 | 0.611 | 3.97E-87 | 3 | 0.615579 |
| TCEAL4   | 2.4E-220 | 0.425773 | 0.895 | 0.858 | 8.1E-216 | 3 | 0.860204 |
| TCEAL5   | 9.56E-87 | 0.29063  | 0.304 | 0.157 | 3.21E-82 | 3 | 0.167407 |
| TCEAL7   | 0        | 0.773863 | 0.778 | 0.575 | 0        | 3 | 0.588856 |
| TENM2    | 5.4E-263 | 0.28453  | 0.183 | 0.029 | 1.8E-258 | 3 | 0.039942 |
| TERF2IP  | 0        | 0.985322 | 0.972 | 0.792 | 0        | 3 | 0.80484  |
| THRA     | 7.4E-213 | 0.46655  | 0.665 | 0.415 | 2.5E-208 | 3 | 0.432607 |
| TIPRL    | 5.25E-79 | 0.288241 | 0.66  | 0.624 | 1.76E-74 | 3 | 0.626133 |
| TLE1     | 5.67E-56 | 0.377571 | 0.626 | 0.635 | 1.9E-51  | 3 | 0.634448 |
| TM2D3    | 1.6E-80  | 0.317226 | 0.589 | 0.521 | 5.37E-76 | 3 | 0.525887 |
| TMCC1    | 2.52E-93 | 0.266244 | 0.328 | 0.177 | 8.44E-89 | 3 | 0.18784  |
| TMEFF2   | 9.35E-73 | 0.351484 | 0.312 | 0.179 | 3.14E-68 | 3 | 0.18887  |
| TMEM132A | 3.4E-169 | 0.420653 | 0.778 | 0.666 | 1.1E-164 | 3 | 0.673963 |
| TMEM132E | 7.2E-295 | 0.256072 | 0.183 | 0.026 | 2.4E-290 | 3 | 0.036637 |
| TMEM14A  | 1.72E-85 | 0.322995 | 0.553 | 0.449 | 5.77E-81 | 3 | 0.456061 |
| TMEM151E | 2.5E-126 | 0.27173  | 0.301 | 0.128 | 8.5E-122 | 3 | 0.140613 |



|         |          |          |       |       |          |   |          |
|---------|----------|----------|-------|-------|----------|---|----------|
| TMEM160 | 2.5E-278 | 0.511312 | 0.892 | 0.846 | 8.3E-274 | 3 | 0.849472 |
| TMEM163 | 9.97E-95 | 0.311089 | 0.388 | 0.221 | 3.34E-90 | 3 | 0.233005 |
| TMEM196 | 3E-246   | 0.293495 | 0.263 | 0.063 | 1E-241   | 3 | 0.077325 |
| TMEM246 | 1.87E-89 | 0.306548 | 0.396 | 0.25  | 6.26E-85 | 3 | 0.259941 |
| TMEM35A | 0        | 0.619934 | 0.589 | 0.188 | 0        | 3 | 0.216623 |
| TMEM59L | 0        | 0.634744 | 0.743 | 0.473 | 0        | 3 | 0.491987 |
| TMEM9B  | 8.97E-80 | 0.296635 | 0.447 | 0.319 | 3.01E-75 | 3 | 0.328204 |
| TMOD2   | 0        | 0.527654 | 0.539 | 0.221 | 0        | 3 | 0.243559 |
| TMSB10  | 0        | 0.657891 | 0.996 | 0.999 | 0        | 3 | 0.998472 |
| TMTC4   | 9.32E-38 | 0.25552  | 0.402 | 0.33  | 3.12E-33 | 3 | 0.335489 |
| TMX4    | 0        | 0.624587 | 0.652 | 0.364 | 0        | 3 | 0.38467  |
| TNIK    | 0        | 0.417875 | 0.383 | 0.091 | 0        | 3 | 0.111155 |
| TNRC6B  | 3.5E-296 | 0.591318 | 0.837 | 0.686 | 1.2E-291 | 3 | 0.696848 |
| TNRC6C  | 1.3E-166 | 0.457466 | 0.586 | 0.394 | 4.3E-162 | 3 | 0.40791  |
| TP53BP1 | 1.86E-82 | 0.309845 | 0.618 | 0.542 | 6.23E-78 | 3 | 0.547067 |
| TRAPPC4 | 8.84E-87 | 0.299222 | 0.732 | 0.716 | 2.96E-82 | 3 | 0.716819 |
| TRIB2   | 9.1E-185 | 0.48308  | 0.489 | 0.269 | 3E-180   | 3 | 0.284176 |
| TRIM2   | 5E-124   | 0.386001 | 0.63  | 0.508 | 1.7E-119 | 3 | 0.516613 |
| TRIM36  | 6.45E-89 | 0.348784 | 0.487 | 0.359 | 2.16E-84 | 3 | 0.368075 |
| TRIM8   | 2.52E-86 | 0.327827 | 0.527 | 0.411 | 8.44E-82 | 3 | 0.419424 |
| TRIO    | 2.1E-166 | 0.409549 | 0.491 | 0.281 | 6.9E-162 | 3 | 0.295796 |
| TSC22D1 | 0        | 0.794003 | 0.95  | 0.877 | 0        | 3 | 0.881987 |
| TSC22D3 | 7E-293   | 0.48384  | 0.491 | 0.196 | 2.4E-288 | 3 | 0.217263 |
| TSG101  | 4.78E-73 | 0.274736 | 0.68  | 0.651 | 1.6E-68  | 3 | 0.653104 |
| TSHZ1   | 2.44E-51 | 0.369925 | 0.396 | 0.307 | 8.19E-47 | 3 | 0.313137 |
| TSHZ2   | 4.5E-136 | 0.545907 | 0.407 | 0.219 | 1.5E-131 | 3 | 0.232401 |
| TSPAN13 | 2E-172   | 0.430657 | 0.77  | 0.658 | 6.7E-168 | 3 | 0.666323 |
| TSPAN7  | 1.5E-118 | 0.370199 | 0.424 | 0.25  | 5E-114   | 3 | 0.262393 |
| TSPYL1  | 2.53E-60 | 0.282554 | 0.488 | 0.395 | 8.48E-56 | 3 | 0.40162  |
| TSPYL4  | 1.1E-137 | 0.390738 | 0.621 | 0.477 | 3.8E-133 | 3 | 0.487047 |
| TTC3    | 6.5E-301 | 0.460179 | 0.972 | 0.958 | 2.2E-296 | 3 | 0.95885  |
| TTC9B   | 0        | 1.005981 | 0.837 | 0.172 | 0        | 3 | 0.218684 |
| TTLL7   | 1.5E-208 | 0.460962 | 0.567 | 0.318 | 5.1E-204 | 3 | 0.335311 |
| TUBA1A  | 0        | 0.598419 | 1     | 1     | 0        | 3 | 0.999609 |
| TUBB2A  | 0        | 1.089013 | 0.993 | 0.912 | 0        | 3 | 0.917451 |
| TUBB2B  | 0        | 0.498017 | 0.997 | 0.996 | 0        | 3 | 0.995736 |
| TUBB3   | 3.5E-102 | 0.332509 | 0.533 | 0.373 | 1.18E-97 | 3 | 0.384279 |
| TUBB4A  | 3.2E-254 | 0.422697 | 0.479 | 0.195 | 1.1E-249 | 3 | 0.21474  |
| TULP4   | 9.3E-136 | 0.38608  | 0.552 | 0.382 | 3.1E-131 | 3 | 0.393909 |
| TXN     | 4.91E-16 | 0.262151 | 0.928 | 0.979 | 1.65E-11 | 3 | 0.974983 |
| TXNIP   | 1.3E-295 | 0.691271 | 0.774 | 0.562 | 4.4E-291 | 3 | 0.576739 |
| UBC     | 0        | 0.470666 | 0.993 | 0.994 | 0        | 3 | 0.993959 |
| UBE2E3  | 1.4E-217 | 0.46974  | 0.897 | 0.886 | 4.7E-213 | 3 | 0.886394 |
| UBE2H   | 5.2E-166 | 0.418128 | 0.644 | 0.466 | 1.7E-161 | 3 | 0.478981 |
| UBE2V2  | 2.3E-108 | 0.294597 | 0.846 | 0.865 | 7.8E-104 | 3 | 0.864077 |
| UBL3    | 5.44E-86 | 0.313728 | 0.413 | 0.275 | 1.82E-81 | 3 | 0.284674 |
| UCHL1   | 0        | 1.035585 | 0.989 | 0.955 | 0        | 3 | 0.957251 |
| UGCG    | 6.9E-108 | 0.316015 | 0.404 | 0.238 | 2.3E-103 | 3 | 0.249991 |



|           |          |          |       |       |          |   |          |
|-----------|----------|----------|-------|-------|----------|---|----------|
| UNCX      | 0        | 0.746258 | 0.413 | 0.016 | 0        | 3 | 0.04449  |
| USP11     | 2.3E-180 | 0.455839 | 0.826 | 0.766 | 7.8E-176 | 3 | 0.770477 |
| USP22     | 4.6E-89  | 0.300769 | 0.749 | 0.726 | 1.54E-84 | 3 | 0.727515 |
| VAMP2     | 0        | 1.125375 | 0.967 | 0.757 | 0        | 3 | 0.772041 |
| VAPA      | 5.5E-110 | 0.310914 | 0.835 | 0.839 | 1.9E-105 | 3 | 0.83906  |
| VASH2     | 1.4E-169 | 0.321178 | 0.348 | 0.14  | 4.6E-165 | 3 | 0.155041 |
| VAT1      | 6.1E-96  | 0.334693 | 0.475 | 0.324 | 2.05E-91 | 3 | 0.334636 |
| VAT1L     | 3.9E-178 | 0.308459 | 0.262 | 0.082 | 1.3E-173 | 3 | 0.094311 |
| VOPP1     | 4.13E-47 | 0.286355 | 0.536 | 0.507 | 1.39E-42 | 3 | 0.509292 |
| VPS26B    | 1.88E-44 | 0.250584 | 0.423 | 0.339 | 6.32E-40 | 3 | 0.345226 |
| VPS28     | 4.3E-151 | 0.329199 | 0.906 | 0.89  | 1.5E-146 | 3 | 0.891546 |
| WASF1     | 1.32E-61 | 0.288812 | 0.506 | 0.423 | 4.43E-57 | 3 | 0.42845  |
| WBP2      | 1.77E-55 | 0.262606 | 0.489 | 0.408 | 5.92E-51 | 3 | 0.41356  |
| WDR47     | 1.47E-76 | 0.269877 | 0.398 | 0.256 | 4.92E-72 | 3 | 0.265982 |
| WDR82     | 1.32E-70 | 0.303974 | 0.593 | 0.537 | 4.43E-66 | 3 | 0.54131  |
| WNK3      | 7.1E-139 | 0.401793 | 0.593 | 0.445 | 2.4E-134 | 3 | 0.455243 |
| WRB       | 1.6E-223 | 0.46408  | 0.729 | 0.556 | 5.4E-219 | 3 | 0.567926 |
| WSB1      | 1.5E-103 | 0.331766 | 0.883 | 0.877 | 5.1E-99  | 3 | 0.877865 |
| WSB2      | 2.1E-167 | 0.393193 | 0.574 | 0.37  | 7E-163   | 3 | 0.384563 |
| XKR4      | 0        | 0.598785 | 0.446 | 0.045 | 0        | 3 | 0.072954 |
| XKR6      | 2.78E-95 | 0.258172 | 0.306 | 0.156 | 9.32E-91 | 3 | 0.166661 |
| XPR1      | 2.1E-141 | 0.38835  | 0.488 | 0.273 | 7E-137   | 3 | 0.288298 |
| YPEL3     | 8.1E-220 | 0.479076 | 0.615 | 0.385 | 2.7E-215 | 3 | 0.401549 |
| YWHAB     | 0        | 0.504989 | 0.983 | 0.974 | 0        | 3 | 0.974486 |
| YWHAG     | 8.1E-259 | 0.513139 | 0.773 | 0.588 | 2.7E-254 | 3 | 0.601009 |
| YWHAH     | 0        | 0.779979 | 0.957 | 0.865 | 0        | 3 | 0.871291 |
| YWHAQ     | 7.5E-240 | 0.326483 | 0.98  | 0.988 | 2.5E-235 | 3 | 0.987101 |
| ZBTB20    | 2.2E-105 | 0.444311 | 0.537 | 0.398 | 7.4E-101 | 3 | 0.408052 |
| ZBTB38    | 8.6E-174 | 0.283769 | 0.28  | 0.093 | 2.9E-169 | 3 | 0.106642 |
| ZC2HC1A   | 0        | 0.840948 | 0.821 | 0.443 | 0        | 3 | 0.469351 |
| ZC3H6     | 2.5E-77  | 0.305802 | 0.476 | 0.351 | 8.4E-73  | 3 | 0.359404 |
| ZCCHC12   | 0        | 0.484928 | 0.426 | 0.073 | 0        | 3 | 0.097545 |
| ZFHX2     | 2.8E-77  | 0.261449 | 0.331 | 0.194 | 9.4E-73  | 3 | 0.204008 |
| ZFHX3     | 0        | 0.9217   | 0.633 | 0.26  | 0        | 3 | 0.285882 |
| ZFHX4     | 1.02E-41 | 0.48959  | 0.407 | 0.342 | 3.4E-37  | 3 | 0.346754 |
| ZFP14     | 3.17E-52 | 0.269844 | 0.437 | 0.348 | 1.06E-47 | 3 | 0.354607 |
| ZMIZ1     | 9.14E-81 | 0.314171 | 0.481 | 0.36  | 3.07E-76 | 3 | 0.368182 |
| ZMYND8    | 4.96E-70 | 0.323569 | 0.531 | 0.443 | 1.66E-65 | 3 | 0.449096 |
| ZNF428    | 0        | 0.519548 | 0.98  | 0.983 | 0        | 3 | 0.982552 |
| ZNF652    | 6.93E-49 | 0.258957 | 0.439 | 0.358 | 2.32E-44 | 3 | 0.363704 |
| ZNF793    | 2.3E-67  | 0.278396 | 0.4   | 0.277 | 7.71E-63 | 3 | 0.285313 |
| ZNF821    | 4.4E-156 | 0.405988 | 0.604 | 0.431 | 1.5E-151 | 3 | 0.442984 |
| ZNF91     | 1.5E-132 | 0.39106  | 0.668 | 0.55  | 5.2E-128 | 3 | 0.558758 |
| ZNRF1     | 1E-278   | 0.541914 | 0.799 | 0.643 | 3.5E-274 | 3 | 0.65385  |
| ABHD14A   | 1.6E-191 | 0.385383 | 0.76  | 0.449 | 5.4E-187 | 4 | 0.466615 |
| ABHD6     | 6E-276   | 0.25553  | 0.443 | 0.12  | 2E-271   | 4 | 0.138232 |
| AC002454. | 0        | 0.289045 | 0.287 | 0.022 | 0        | 4 | 0.037099 |
| AC084033. | 5.1E-162 | 0.328421 | 0.812 | 0.509 | 1.7E-157 | 4 | 0.525887 |

|           |          |          |       |       |          |   |          |
|-----------|----------|----------|-------|-------|----------|---|----------|
| ACADVL    | 0        | 0.522858 | 0.858 | 0.44  | 0        | 4 | 0.463061 |
| ACTA2     | 0        | 0.718906 | 0.246 | 0.021 | 0        | 4 | 0.033474 |
| ACTN1     | 1.2E-102 | 0.262859 | 0.601 | 0.346 | 4.14E-98 | 4 | 0.360613 |
| ADAM9     | 0        | 0.384676 | 0.617 | 0.155 | 0        | 4 | 0.180484 |
| ADAMTS1   | 0        | 0.299137 | 0.285 | 0.029 | 0        | 4 | 0.043211 |
| ADD3      | 0        | 0.480694 | 0.745 | 0.277 | 0        | 4 | 0.303507 |
| ADGRL3    | 0        | 0.513111 | 0.636 | 0.089 | 0        | 4 | 0.119932 |
| ADGRV1    | 0        | 0.674807 | 0.826 | 0.35  | 0        | 4 | 0.376248 |
| AGPAT2    | 1.2E-112 | 0.255402 | 0.603 | 0.338 | 4E-108   | 4 | 0.35283  |
| AGTRAP    | 0        | 0.466124 | 0.744 | 0.296 | 0        | 4 | 0.320671 |
| AHNAK     | 0        | 0.44132  | 0.675 | 0.209 | 0        | 4 | 0.234782 |
| AIG1      | 8.6E-149 | 0.292868 | 0.76  | 0.464 | 2.9E-144 | 4 | 0.48058  |
| AL355338. | 7.1E-202 | 0.266507 | 0.524 | 0.204 | 2.4E-197 | 4 | 0.222025 |
| ALDH9A1   | 0        | 0.613699 | 0.885 | 0.545 | 0        | 4 | 0.563662 |
| ALKBH7    | 1.3E-236 | 0.405435 | 0.965 | 0.828 | 4.2E-232 | 4 | 0.835685 |
| ANXA1     | 0        | 0.724217 | 0.384 | 0.016 | 0        | 4 | 0.036353 |
| ANXA2     | 0        | 1.360972 | 0.866 | 0.142 | 0        | 4 | 0.1829   |
| ANXA3     | 0        | 0.303367 | 0.293 | 0.007 | 0        | 4 | 0.023311 |
| ANXA5     | 6.8E-295 | 0.518352 | 0.962 | 0.714 | 2.3E-290 | 4 | 0.727764 |
| ANXA6     | 5.8E-270 | 0.379661 | 0.76  | 0.369 | 1.9E-265 | 4 | 0.390889 |
| APLP2     | 0        | 0.732253 | 0.941 | 0.709 | 0        | 4 | 0.721581 |
| APOE      | 0        | 0.792354 | 0.432 | 0.035 | 0        | 4 | 0.056892 |
| APP       | 4.7E-154 | 0.277253 | 0.916 | 0.699 | 1.6E-149 | 4 | 0.711275 |
| ARFGAP3   | 9.1E-133 | 0.271624 | 0.714 | 0.418 | 3.1E-128 | 4 | 0.434988 |
| ARID5B    | 1.1E-173 | 0.369203 | 0.641 | 0.324 | 3.8E-169 | 4 | 0.341992 |
| ARL1      | 6.2E-194 | 0.324112 | 0.765 | 0.435 | 2.1E-189 | 4 | 0.453253 |
| ARL4A     | 0        | 0.659343 | 0.709 | 0.19  | 0        | 4 | 0.219466 |
| ARL4C     | 0        | 0.647456 | 0.743 | 0.335 | 0        | 4 | 0.357876 |
| ATP11C    | 0        | 0.519176 | 0.583 | 0.158 | 0        | 4 | 0.181515 |
| ATP1A2    | 0        | 0.76392  | 0.616 | 0.038 | 0        | 4 | 0.070076 |
| ATP1B1    | 6.3E-185 | 0.369398 | 0.76  | 0.433 | 2.1E-180 | 4 | 0.450979 |
| ATP1B2    | 0        | 0.427834 | 0.69  | 0.254 | 0        | 4 | 0.278562 |
| ATP2B1    | 3.7E-148 | 0.469124 | 0.802 | 0.571 | 1.3E-143 | 4 | 0.583703 |
| ATP5IF1   | 1.6E-203 | 0.331877 | 0.988 | 0.944 | 5.2E-199 | 4 | 0.946057 |
| ATP6AP2   | 1.6E-163 | 0.319847 | 0.893 | 0.669 | 5.2E-159 | 4 | 0.681426 |
| ATP6VOE1  | 2.6E-145 | 0.302899 | 0.912 | 0.744 | 8.6E-141 | 4 | 0.753314 |
| ATRAID    | 5.5E-273 | 0.449248 | 0.932 | 0.718 | 1.8E-268 | 4 | 0.729825 |
| B2M       | 4.8E-195 | 0.465047 | 0.849 | 0.554 | 1.6E-190 | 4 | 0.570555 |
| B4GAT1    | 6E-174   | 0.306062 | 0.727 | 0.394 | 2E-169   | 4 | 0.412245 |
| B9D1      | 2.6E-229 | 0.27122  | 0.568 | 0.215 | 8.6E-225 | 4 | 0.235066 |
| BAALC     | 0        | 0.441161 | 0.475 | 0.094 | 0        | 4 | 0.114921 |
| BAMBI     | 0        | 0.590953 | 0.545 | 0.072 | 0        | 4 | 0.098575 |
| BCAM      | 2E-206   | 0.281909 | 0.573 | 0.24  | 6.8E-202 | 4 | 0.258449 |
| BCAP31    | 9.5E-170 | 0.33154  | 0.863 | 0.615 | 3.2E-165 | 4 | 0.628833 |
| BLVRB     | 0        | 0.533117 | 0.804 | 0.335 | 0        | 4 | 0.361643 |
| BMP7      | 0        | 0.772956 | 0.836 | 0.311 | 0        | 4 | 0.339967 |
| BORCS7    | 3.3E-142 | 0.301321 | 0.793 | 0.519 | 1.1E-137 | 4 | 0.534523 |
| BRI3      | 3.2E-162 | 0.314781 | 0.982 | 0.931 | 1.1E-157 | 4 | 0.933727 |

|          |          |          |       |       |          |   |          |
|----------|----------|----------|-------|-------|----------|---|----------|
| BSG      | 0        | 0.540189 | 0.983 | 0.92  | 0        | 4 | 0.923812 |
| C19orf53 | 4.1E-189 | 0.32129  | 0.985 | 0.911 | 1.4E-184 | 4 | 0.915035 |
| C19orf70 | 7.3E-110 | 0.26096  | 0.839 | 0.62  | 2.4E-105 | 4 | 0.6326   |
| C1orf122 | 0        | 0.773608 | 0.974 | 0.77  | 0        | 4 | 0.781813 |
| C3orf58  | 0        | 0.394903 | 0.57  | 0.158 | 0        | 4 | 0.180591 |
| C4orf3   | 8E-119   | 0.280274 | 0.932 | 0.763 | 2.7E-114 | 4 | 0.772503 |
| C5orf49  | 0        | 0.661707 | 0.656 | 0.07  | 0        | 4 | 0.102519 |
| C6orf118 | 0        | 0.260332 | 0.408 | 0.073 | 0        | 4 | 0.091859 |
| C7orf50  | 2.8E-226 | 0.392154 | 0.962 | 0.845 | 9.3E-222 | 4 | 0.851853 |
| C9orf116 | 1.1E-244 | 0.383911 | 0.662 | 0.289 | 3.8E-240 | 4 | 0.310295 |
| CA2      | 0        | 0.511533 | 0.4   | 0.019 | 0        | 4 | 0.040013 |
| CA4      | 0        | 0.298025 | 0.191 | 0.001 | 0        | 4 | 0.0113   |
| CALB1    | 0        | 0.429852 | 0.24  | 0.006 | 0        | 4 | 0.019402 |
| CALD1    | 9.2E-115 | 0.454787 | 0.934 | 0.786 | 3.1E-110 | 4 | 0.794712 |
| CALR     | 0        | 0.63226  | 0.98  | 0.889 | 0        | 4 | 0.894496 |
| CALU     | 4.4E-248 | 0.468175 | 0.922 | 0.712 | 1.5E-243 | 4 | 0.723855 |
| CANX     | 4.8E-289 | 0.495636 | 0.955 | 0.78  | 1.6E-284 | 4 | 0.789844 |
| CAPSL    | 0        | 0.333485 | 0.328 | 0.002 | 0        | 4 | 0.019793 |
| CAST     | 0        | 0.328428 | 0.536 | 0.152 | 0        | 4 | 0.173164 |
| CAVIN1   | 0        | 0.312258 | 0.401 | 0.015 | 0        | 4 | 0.036175 |
| CCDC80   | 0        | 0.392096 | 0.397 | 0.019 | 0        | 4 | 0.0398   |
| CCK      | 0        | 0.292529 | 0.176 | 0.003 | 0        | 4 | 0.012402 |
| CCND1    | 4.4E-146 | 0.435445 | 0.849 | 0.605 | 1.5E-141 | 4 | 0.618422 |
| CD151    | 2.4E-160 | 0.32725  | 0.814 | 0.534 | 7.9E-156 | 4 | 0.549447 |
| CD59     | 2.2E-238 | 0.40071  | 0.807 | 0.461 | 7.4E-234 | 4 | 0.480011 |
| CD63     | 0        | 1.066117 | 0.989 | 0.952 | 0        | 4 | 0.953875 |
| CD81     | 0        | 0.513865 | 0.983 | 0.955 | 0        | 4 | 0.956469 |
| CD9      | 0        | 0.546559 | 0.541 | 0.045 | 0        | 4 | 0.072385 |
| CD99     | 8.8E-209 | 0.48651  | 0.943 | 0.705 | 3E-204   | 4 | 0.718382 |
| CDH11    | 0        | 0.39804  | 0.529 | 0.033 | 0        | 4 | 0.061014 |
| CDH2     | 5E-114   | 0.324793 | 0.96  | 0.877 | 1.7E-109 | 4 | 0.881205 |
| CDH6     | 0        | 0.473723 | 0.419 | 0.02  | 0        | 4 | 0.042749 |
| CDK6     | 2E-113   | 0.279749 | 0.523 | 0.271 | 6.6E-109 | 4 | 0.284674 |
| CDKN1C   | 0        | 0.451575 | 0.654 | 0.22  | 0        | 4 | 0.244448 |
| CDO1     | 0        | 1.33107  | 0.927 | 0.31  | 0        | 4 | 0.344515 |
| CETN2    | 0        | 0.533039 | 0.935 | 0.72  | 0        | 4 | 0.732099 |
| CFAP126  | 0        | 0.847228 | 0.601 | 0.003 | 0        | 4 | 0.036033 |
| CFAP46   | 0        | 0.265778 | 0.416 | 0.079 | 0        | 4 | 0.098149 |
| CFI      | 0        | 0.378262 | 0.449 | 0.077 | 0        | 4 | 0.097971 |
| CHCHD10  | 1.6E-173 | 0.353175 | 0.611 | 0.302 | 5.4E-169 | 4 | 0.31964  |
| CHCHD5   | 2.9E-212 | 0.372855 | 0.856 | 0.575 | 9.9E-208 | 4 | 0.590278 |
| CHID1    | 2.8E-227 | 0.400368 | 0.866 | 0.598 | 9.3E-223 | 4 | 0.613091 |
| CHMP2A   | 7.2E-246 | 0.411795 | 0.95  | 0.805 | 2.4E-241 | 4 | 0.812942 |
| CHPF     | 1E-306   | 0.285521 | 0.519 | 0.151 | 3.5E-302 | 4 | 0.171742 |
| CIB1     | 0        | 0.621966 | 0.811 | 0.289 | 0        | 4 | 0.318148 |
| CITED2   | 3.8E-177 | 0.306159 | 0.672 | 0.329 | 1.3E-172 | 4 | 0.348069 |
| CLDN3    | 0        | 0.457965 | 0.402 | 0.006 | 0        | 4 | 0.028037 |
| CLDN5    | 0        | 1.042765 | 0.419 | 0.012 | 0        | 4 | 0.034363 |

|         |          |          |       |       |          |   |          |
|---------|----------|----------|-------|-------|----------|---|----------|
| CLEC11A | 1E-203   | 0.319744 | 0.724 | 0.37  | 3.5E-199 | 4 | 0.389858 |
| CLIC1   | 2.9E-219 | 0.437955 | 0.95  | 0.73  | 9.6E-215 | 4 | 0.742085 |
| CLU     | 0        | 1.581841 | 0.976 | 0.626 | 0        | 4 | 0.645748 |
| CMTM6   | 2.5E-186 | 0.302537 | 0.741 | 0.399 | 8.4E-182 | 4 | 0.41818  |
| CNN3    | 3.63E-90 | 0.304288 | 0.959 | 0.889 | 1.22E-85 | 4 | 0.892754 |
| CNPY2   | 2.1E-121 | 0.263843 | 0.933 | 0.788 | 7E-117   | 4 | 0.795956 |
| CNTNAP2 | 4E-185   | 0.404787 | 0.913 | 0.661 | 1.3E-180 | 4 | 0.675171 |
| COL11A1 | 9.6E-161 | 0.259381 | 0.563 | 0.252 | 3.2E-156 | 4 | 0.269642 |
| COL18A1 | 6E-275   | 0.4134   | 0.628 | 0.259 | 2E-270   | 4 | 0.279983 |
| COL1A2  | 0        | 0.814077 | 0.316 | 0.019 | 0        | 4 | 0.035251 |
| COL26A1 | 0        | 0.313744 | 0.466 | 0.075 | 0        | 4 | 0.096905 |
| COL4A5  | 2E-144   | 0.296675 | 0.713 | 0.406 | 6.6E-140 | 4 | 0.422942 |
| COL6A1  | 8.2E-284 | 0.412209 | 0.768 | 0.37  | 2.8E-279 | 4 | 0.392666 |
| COL6A2  | 0        | 0.380207 | 0.525 | 0.094 | 0        | 4 | 0.118226 |
| COL9A2  | 0        | 0.483654 | 0.448 | 0.083 | 0        | 4 | 0.103301 |
| COLEC12 | 0        | 0.54483  | 0.454 | 0.012 | 0        | 4 | 0.036282 |
| COMT    | 1.7E-178 | 0.4059   | 0.687 | 0.387 | 5.7E-174 | 4 | 0.404108 |
| COTL1   | 2E-119   | 0.352904 | 0.775 | 0.514 | 6.6E-115 | 4 | 0.528482 |
| CP      | 0        | 0.929055 | 0.518 | 0.005 | 0        | 4 | 0.033403 |
| CPXM1   | 6.1E-219 | 0.260676 | 0.511 | 0.185 | 2E-214   | 4 | 0.203582 |
| CRABP2  | 0        | 0.683304 | 0.627 | 0.136 | 0        | 4 | 0.163391 |
| CRB2    | 4.7E-169 | 0.278332 | 0.649 | 0.313 | 1.6E-164 | 4 | 0.332255 |
| CRELD2  | 3.4E-145 | 0.255502 | 0.684 | 0.364 | 1.1E-140 | 4 | 0.381472 |
| CRYAB   | 0        | 0.361606 | 0.175 | 0.009 | 0        | 4 | 0.018549 |
| CST3    | 0        | 0.768736 | 0.973 | 0.796 | 0        | 4 | 0.805622 |
| CSTB    | 2.8E-152 | 0.303588 | 0.976 | 0.907 | 9.3E-148 | 4 | 0.910486 |
| CTGF    | 0        | 0.723708 | 0.507 | 0.039 | 0        | 4 | 0.065172 |
| CTNNA1  | 2.5E-142 | 0.29841  | 0.782 | 0.495 | 8.4E-138 | 4 | 0.510998 |
| CTSD    | 0        | 0.597571 | 0.875 | 0.48  | 0        | 4 | 0.502363 |
| CTSH    | 0        | 0.26093  | 0.399 | 0.059 | 0        | 4 | 0.077965 |
| CTSL    | 0        | 0.389888 | 0.677 | 0.229 | 0        | 4 | 0.253936 |
| CUTA    | 9E-129   | 0.271285 | 0.977 | 0.926 | 3E-124   | 4 | 0.928645 |
| CXCL14  | 0        | 0.655913 | 0.376 | 0.035 | 0        | 4 | 0.054262 |
| CXCR4   | 8.21E-59 | 0.260299 | 0.508 | 0.325 | 2.75E-54 | 4 | 0.334921 |
| CXXC5   | 1.4E-131 | 0.318887 | 0.851 | 0.62  | 4.7E-127 | 4 | 0.633275 |
| CYBA    | 2.8E-139 | 0.40981  | 0.529 | 0.276 | 9.5E-135 | 4 | 0.290572 |
| CYP1B1  | 0        | 0.429162 | 0.233 | 0.008 | 0        | 4 | 0.02093  |
| CYSTM1  | 0        | 0.910241 | 0.863 | 0.327 | 0        | 4 | 0.357343 |
| DAD1    | 0        | 0.479419 | 0.977 | 0.92  | 0        | 4 | 0.922853 |
| DALRD3  | 1.4E-189 | 0.329436 | 0.801 | 0.465 | 4.6E-185 | 4 | 0.483352 |
| DDOST   | 1.2E-148 | 0.316522 | 0.896 | 0.693 | 4.2E-144 | 4 | 0.704382 |
| DDR1    | 5.27E-97 | 0.266418 | 0.763 | 0.53  | 1.77E-92 | 4 | 0.542554 |
| DECR1   | 1.6E-275 | 0.402153 | 0.785 | 0.394 | 5.3E-271 | 4 | 0.415728 |
| DKK3    | 0        | 0.493694 | 0.721 | 0.214 | 0        | 4 | 0.242315 |
| DMD     | 8.7E-215 | 0.346512 | 0.653 | 0.3   | 2.9E-210 | 4 | 0.319925 |
| DMKN    | 0        | 0.516686 | 0.499 | 0.01  | 0        | 4 | 0.037206 |
| DNAJC3  | 2E-250   | 0.257129 | 0.533 | 0.18  | 6.6E-246 | 4 | 0.199389 |
| DNAJC4  | 1.6E-250 | 0.378436 | 0.753 | 0.367 | 5.4E-246 | 4 | 0.388437 |

|           |          |          |       |       |          |   |          |
|-----------|----------|----------|-------|-------|----------|---|----------|
| DNALI1    | 0        | 0.466965 | 0.687 | 0.236 | 0        | 4 | 0.26122  |
| DNPH1     | 1.5E-176 | 0.379793 | 0.878 | 0.644 | 5E-172   | 4 | 0.65751  |
| DPCD      | 0        | 0.517387 | 0.814 | 0.428 | 0        | 4 | 0.449806 |
| ECEL1     | 2.3E-55  | 0.304661 | 0.531 | 0.377 | 7.73E-51 | 4 | 0.385523 |
| ECH1      | 3.8E-177 | 0.338993 | 0.877 | 0.639 | 1.3E-172 | 4 | 0.652145 |
| ECHS1     | 3.5E-144 | 0.282247 | 0.947 | 0.819 | 1.2E-139 | 4 | 0.826516 |
| EDNRB     | 6.6E-278 | 0.374464 | 0.308 | 0.066 | 2.2E-273 | 4 | 0.079528 |
| EFHC1     | 4.7E-211 | 0.382835 | 0.805 | 0.481 | 1.6E-206 | 4 | 0.498632 |
| EIF3E     | 1.9E-180 | 0.39599  | 0.995 | 0.952 | 6.3E-176 | 4 | 0.95423  |
| EMC2      | 0        | 0.508788 | 0.742 | 0.324 | 0        | 4 | 0.347784 |
| EPHX1     | 0        | 0.400621 | 0.621 | 0.205 | 0        | 4 | 0.228279 |
| ERBB4     | 0        | 0.254608 | 0.349 | 0.018 | 0        | 4 | 0.036317 |
| ERGIC3    | 2.6E-177 | 0.343958 | 0.859 | 0.605 | 8.7E-173 | 4 | 0.619488 |
| ERP29     | 6.5E-186 | 0.341058 | 0.966 | 0.883 | 2.2E-181 | 4 | 0.887602 |
| EVA1B     | 0        | 0.318669 | 0.425 | 0.057 | 0        | 4 | 0.077929 |
| FAM107A   | 0        | 0.660288 | 0.48  | 0.028 | 0        | 4 | 0.052912 |
| FAM181B   | 0        | 0.744136 | 0.616 | 0.042 | 0        | 4 | 0.074482 |
| FAM213A   | 1.8E-105 | 0.264653 | 0.954 | 0.765 | 6E-101   | 4 | 0.775736 |
| FAM229B   | 7.5E-141 | 0.30558  | 0.858 | 0.615 | 2.5E-136 | 4 | 0.628158 |
| FAM234A   | 2.5E-166 | 0.25415  | 0.584 | 0.268 | 8.4E-162 | 4 | 0.285917 |
| FAM81B    | 0        | 0.341446 | 0.385 | 0.002 | 0        | 4 | 0.02324  |
| FAM84B    | 0        | 0.26376  | 0.337 | 0.031 | 0        | 4 | 0.048186 |
| FAM89A    | 9.8E-114 | 0.89584  | 0.517 | 0.273 | 3.3E-109 | 4 | 0.286273 |
| FEZ2      | 3.5E-274 | 0.453888 | 0.864 | 0.551 | 1.2E-269 | 4 | 0.568139 |
| FEZF1-AS1 | 0        | 0.352435 | 0.367 | 0.051 | 0        | 4 | 0.068477 |
| FGFR2     | 3.5E-296 | 0.398358 | 0.602 | 0.224 | 1.2E-291 | 4 | 0.244803 |
| FKBP10    | 3.6E-256 | 0.379788 | 0.771 | 0.382 | 1.2E-251 | 4 | 0.403397 |
| FKBP2     | 0        | 0.526059 | 0.922 | 0.701 | 0        | 4 | 0.713443 |
| FLNA      | 3.7E-185 | 0.373675 | 0.793 | 0.489 | 1.2E-180 | 4 | 0.505526 |
| FLNB      | 2.8E-298 | 0.256925 | 0.487 | 0.138 | 9.5E-294 | 4 | 0.157919 |
| FN1       | 3.1E-173 | 0.270899 | 0.256 | 0.066 | 1E-168   | 4 | 0.076614 |
| FOLR1     | 0        | 0.538204 | 0.394 | 0.002 | 0        | 4 | 0.024022 |
| FOXJ1     | 0        | 0.256315 | 0.358 | 0.03  | 0        | 4 | 0.048577 |
| FSTL1     | 0        | 0.750589 | 0.733 | 0.221 | 0        | 4 | 0.2496   |
| FTH1      | 0        | 0.427306 | 0.999 | 0.997 | 0        | 4 | 0.997299 |
| FTL       | 1.2E-168 | 0.442972 | 0.997 | 0.995 | 4.1E-164 | 4 | 0.994883 |
| FUCA2     | 0        | 0.385833 | 0.599 | 0.114 | 0        | 4 | 0.14136  |
| FXYP1     | 0        | 0.308018 | 0.36  | 0.031 | 0        | 4 | 0.049323 |
| G6PC3     | 7.9E-277 | 0.409136 | 0.767 | 0.384 | 2.7E-272 | 4 | 0.405707 |
| GALNT12   | 0        | 0.291298 | 0.399 | 0.025 | 0        | 4 | 0.046267 |
| GCC2      | 5.1E-133 | 0.276248 | 0.729 | 0.447 | 1.7E-128 | 4 | 0.463097 |
| GCHFR     | 1.5E-176 | 0.330377 | 0.586 | 0.274 | 4.9E-172 | 4 | 0.291496 |
| GCNT1     | 0        | 0.33704  | 0.376 | 0.015 | 0        | 4 | 0.035073 |
| GDF11     | 3.5E-128 | 0.264258 | 0.709 | 0.414 | 1.2E-123 | 4 | 0.430262 |
| GDF7      | 0        | 0.300167 | 0.279 | 0.003 | 0        | 4 | 0.018194 |
| GDPD2     | 0        | 0.46586  | 0.487 | 0.012 | 0        | 4 | 0.038165 |
| GINM1     | 5E-140   | 0.282433 | 0.783 | 0.509 | 1.7E-135 | 4 | 0.524608 |
| GJA1      | 0        | 0.569308 | 0.631 | 0.061 | 0        | 4 | 0.093032 |

|          |          |          |       |       |          |   |          |
|----------|----------|----------|-------|-------|----------|---|----------|
| GLIS3    | 0        | 0.433112 | 0.45  | 0.017 | 0        | 4 | 0.041541 |
| GMPR2    | 4.6E-126 | 0.252397 | 0.741 | 0.457 | 1.6E-121 | 4 | 0.473118 |
| GNG11    | 0        | 0.447142 | 0.438 | 0.103 | 0        | 4 | 0.121602 |
| GNG5     | 0        | 0.498695 | 0.986 | 0.823 | 0        | 4 | 0.83238  |
| GOLGB1   | 2.98E-94 | 0.260126 | 0.805 | 0.571 | 9.99E-90 | 4 | 0.584521 |
| GOLM1    | 1.8E-187 | 0.403261 | 0.918 | 0.724 | 6.1E-183 | 4 | 0.73512  |
| GPAA1    | 2.2E-158 | 0.315892 | 0.792 | 0.511 | 7.3E-154 | 4 | 0.526882 |
| GPC3     | 8.14E-68 | 0.329065 | 0.452 | 0.267 | 2.73E-63 | 4 | 0.277495 |
| GPM6B    | 2.41E-33 | 0.638563 | 0.744 | 0.701 | 8.07E-29 | 4 | 0.703102 |
| GPX8     | 6.9E-272 | 0.266865 | 0.515 | 0.165 | 2.3E-267 | 4 | 0.184073 |
| GRM8     | 0        | 0.282107 | 0.324 | 0.014 | 0        | 4 | 0.031662 |
| GRN      | 0        | 0.441248 | 0.737 | 0.324 | 0        | 4 | 0.347358 |
| GRSF1    | 2.3E-130 | 0.286813 | 0.767 | 0.497 | 7.8E-126 | 4 | 0.512277 |
| GSN      | 2.1E-204 | 0.294387 | 0.582 | 0.244 | 7.2E-200 | 4 | 0.263281 |
| GSTK1    | 0        | 0.343702 | 0.601 | 0.19  | 0        | 4 | 0.213319 |
| GSTP1    | 0        | 0.592508 | 0.999 | 0.985 | 0        | 4 | 0.985964 |
| GUK1     | 1.2E-138 | 0.281116 | 0.967 | 0.896 | 3.9E-134 | 4 | 0.899577 |
| GULP1    | 0        | 0.421665 | 0.68  | 0.251 | 0        | 4 | 0.274972 |
| HEXA     | 2.2E-179 | 0.289733 | 0.669 | 0.34  | 7.3E-175 | 4 | 0.358303 |
| HEXB     | 1.4E-307 | 0.28712  | 0.537 | 0.165 | 4.8E-303 | 4 | 0.185814 |
| HLA-A    | 6.4E-194 | 0.404345 | 0.802 | 0.502 | 2.1E-189 | 4 | 0.518638 |
| HLA-C    | 2.6E-145 | 0.29531  | 0.585 | 0.294 | 8.6E-141 | 4 | 0.31001  |
| HOPX     | 7.82E-85 | 0.388491 | 0.226 | 0.085 | 2.62E-80 | 4 | 0.093138 |
| HSBP1    | 0        | 0.545151 | 0.996 | 0.975 | 0        | 4 | 0.976014 |
| HSD17B12 | 5.3E-105 | 0.265171 | 0.81  | 0.582 | 1.8E-100 | 4 | 0.594755 |
| HSD17B8  | 0        | 0.283924 | 0.447 | 0.093 | 0        | 4 | 0.113002 |
| HSP90B1  | 0        | 0.57953  | 0.971 | 0.857 | 0        | 4 | 0.863473 |
| HSPA5    | 1E-306   | 0.587516 | 0.951 | 0.756 | 3.4E-302 | 4 | 0.766639 |
| HSPB1    | 0        | 0.711321 | 0.95  | 0.595 | 0        | 4 | 0.614584 |
| HTR2C    | 0        | 0.891969 | 0.298 | 0.006 | 0        | 4 | 0.021996 |
| HTRA1    | 0        | 0.914252 | 0.802 | 0.121 | 0        | 4 | 0.15863  |
| ID1      | 2.15E-86 | 0.692323 | 0.663 | 0.46  | 7.21E-82 | 4 | 0.471128 |
| ID3      | 1.62E-44 | 0.484622 | 0.698 | 0.539 | 5.43E-40 | 4 | 0.547493 |
| IFI27L1  | 2.1E-217 | 0.34489  | 0.686 | 0.335 | 7E-213   | 4 | 0.354572 |
| IFI27L2  | 7.7E-218 | 0.476051 | 0.781 | 0.453 | 2.6E-213 | 4 | 0.471412 |
| IFI6     | 0        | 0.358354 | 0.553 | 0.132 | 0        | 4 | 0.155538 |
| IFIT1    | 0        | 0.518442 | 0.328 | 0.033 | 0        | 4 | 0.049359 |
| IFITM1   | 0        | 0.587257 | 0.415 | 0.024 | 0        | 4 | 0.045841 |
| IFITM2   | 0        | 0.579731 | 0.562 | 0.014 | 0        | 4 | 0.044739 |
| IFITM3   | 0        | 1.920652 | 0.931 | 0.309 | 0        | 4 | 0.343556 |
| IFT22    | 0        | 0.519177 | 0.912 | 0.603 | 0        | 4 | 0.620483 |
| IGFBP2   | 0        | 0.569538 | 0.995 | 0.976 | 0        | 4 | 0.977115 |
| IGFBP4   | 4.6E-221 | 0.282607 | 0.567 | 0.218 | 1.5E-216 | 4 | 0.237731 |
| IGFBP5   | 2.7E-290 | 0.783798 | 0.768 | 0.394 | 8.9E-286 | 4 | 0.414804 |
| IGFBP7   | 0        | 1.723426 | 0.518 | 0.03  | 0        | 4 | 0.057176 |
| IL17RD   | 0        | 0.335476 | 0.52  | 0.137 | 0        | 4 | 0.158239 |
| ILK      | 1.9E-157 | 0.317168 | 0.782 | 0.484 | 6.4E-153 | 4 | 0.5008   |
| IRS1     | 0        | 0.42815  | 0.564 | 0.142 | 0        | 4 | 0.165346 |



|           |          |          |       |       |          |   |          |
|-----------|----------|----------|-------|-------|----------|---|----------|
| ISCU      | 5.1E-127 | 0.2788   | 0.839 | 0.635 | 1.7E-122 | 4 | 0.646708 |
| ISYNA1    | 1.4E-182 | 0.414198 | 0.914 | 0.724 | 4.6E-178 | 4 | 0.734658 |
| ITGA6     | 3.4E-303 | 0.368514 | 0.58  | 0.2   | 1.1E-298 | 4 | 0.220852 |
| ITGB1     | 1.4E-223 | 0.404467 | 0.896 | 0.634 | 4.6E-219 | 4 | 0.648911 |
| ITM2B     | 0        | 1.031858 | 0.99  | 0.876 | 0        | 4 | 0.882271 |
| ITM2C     | 0        | 0.720639 | 0.863 | 0.479 | 0        | 4 | 0.500551 |
| KCNJ13    | 0        | 0.357495 | 0.295 | 0.003 | 0        | 4 | 0.019331 |
| KCNQ1OT1  | 5.7E-222 | 0.690793 | 0.795 | 0.449 | 1.9E-217 | 4 | 0.468356 |
| KDELR1    | 0        | 0.580177 | 0.979 | 0.879 | 0        | 4 | 0.884332 |
| KIF9      | 0        | 0.719507 | 0.765 | 0.213 | 0        | 4 | 0.24363  |
| KLHDC8B   | 0        | 0.812843 | 0.859 | 0.253 | 0        | 4 | 0.286521 |
| KRT18     | 0        | 1.176792 | 0.707 | 0.096 | 0        | 4 | 0.130308 |
| KRT8      | 0        | 1.139115 | 0.647 | 0.025 | 0        | 4 | 0.060019 |
| LAMB1     | 0        | 0.26098  | 0.328 | 0.052 | 0        | 4 | 0.067233 |
| LAMB2     | 0        | 0.400172 | 0.555 | 0.088 | 0        | 4 | 0.114388 |
| LAMP1     | 1.3E-122 | 0.264111 | 0.702 | 0.424 | 4.2E-118 | 4 | 0.439537 |
| LAMP2     | 0        | 0.355382 | 0.634 | 0.215 | 0        | 4 | 0.238869 |
| LAMTOR1   | 4.6E-113 | 0.268957 | 0.93  | 0.787 | 1.5E-108 | 4 | 0.795281 |
| LAMTOR4   | 1.7E-222 | 0.374921 | 0.959 | 0.831 | 5.8E-218 | 4 | 0.837923 |
| LEPROT    | 2.2E-192 | 0.295368 | 0.693 | 0.338 | 7.5E-188 | 4 | 0.358232 |
| LGALS3    | 0        | 0.329316 | 0.266 | 0.01  | 0        | 4 | 0.024519 |
| LGALS3BP  | 2.6E-225 | 0.394841 | 0.774 | 0.431 | 8.8E-221 | 4 | 0.450553 |
| LGI1      | 0        | 0.586371 | 0.577 | 0.016 | 0        | 4 | 0.046907 |
| LHFPL6    | 0        | 0.617928 | 0.693 | 0.128 | 0        | 4 | 0.15998  |
| LINC00982 | 0        | 0.367128 | 0.461 | 0.113 | 0        | 4 | 0.132085 |
| LIPA      | 3.4E-170 | 0.266468 | 0.404 | 0.142 | 1.1E-165 | 4 | 0.156995 |
| LITAF     | 0        | 0.396261 | 0.632 | 0.159 | 0        | 4 | 0.185601 |
| LMAN1     | 2.6E-260 | 0.40593  | 0.741 | 0.368 | 8.7E-256 | 4 | 0.388792 |
| LMAN2     | 2E-204   | 0.367198 | 0.892 | 0.661 | 6.7E-200 | 4 | 0.673572 |
| LMNA      | 1.9E-228 | 0.397044 | 0.688 | 0.332 | 6.2E-224 | 4 | 0.352049 |
| LMX1A     | 0        | 0.280682 | 0.385 | 0.004 | 0        | 4 | 0.025301 |
| LOXL1     | 0        | 0.410734 | 0.585 | 0.171 | 0        | 4 | 0.194414 |
| LPL       | 0        | 0.57887  | 0.226 | 0.03  | 0        | 4 | 0.041114 |
| LPP       | 0        | 0.261439 | 0.456 | 0.115 | 0        | 4 | 0.133862 |
| LRP10     | 0        | 0.390121 | 0.577 | 0.1   | 0        | 4 | 0.126328 |
| LRPAP1    | 3.3E-185 | 0.359701 | 0.89  | 0.687 | 1.1E-180 | 4 | 0.698518 |
| LRRIQ1    | 0        | 0.422614 | 0.641 | 0.222 | 0        | 4 | 0.245833 |
| LRRN2     | 0        | 0.459529 | 0.681 | 0.171 | 0        | 4 | 0.199673 |
| LSR       | 0        | 0.277752 | 0.399 | 0.021 | 0        | 4 | 0.041754 |
| LY6H      | 1.1E-263 | 0.610791 | 0.85  | 0.514 | 3.8E-259 | 4 | 0.532959 |
| MAF       | 0        | 0.728699 | 0.741 | 0.038 | 0        | 4 | 0.077254 |
| MAGED2    | 5.4E-280 | 0.434155 | 0.992 | 0.97  | 1.8E-275 | 4 | 0.971074 |
| MAML2     | 0        | 0.306202 | 0.513 | 0.088 | 0        | 4 | 0.111794 |
| MDK       | 0        | 1.249628 | 0.986 | 0.749 | 0        | 4 | 0.761984 |
| MEST      | 0        | 1.323955 | 0.943 | 0.244 | 0        | 4 | 0.283359 |
| METRNL    | 0        | 1.199188 | 0.976 | 0.685 | 0        | 4 | 0.700899 |
| METRNL    | 0        | 0.513323 | 0.723 | 0.214 | 0        | 4 | 0.241996 |
| MFAP2     | 8.9E-191 | 0.343285 | 0.714 | 0.372 | 3E-186   | 4 | 0.391173 |

|          |          |          |       |       |          |   |          |
|----------|----------|----------|-------|-------|----------|---|----------|
| MGAT4B   | 1.7E-125 | 0.278693 | 0.81  | 0.585 | 5.8E-121 | 4 | 0.597598 |
| MGST1    | 0        | 0.942672 | 0.761 | 0.108 | 0        | 4 | 0.144025 |
| MIR99AHG | 0        | 0.504265 | 0.744 | 0.244 | 0        | 4 | 0.271668 |
| MLEC     | 1.4E-104 | 0.266292 | 0.837 | 0.643 | 4.6E-100 | 4 | 0.654241 |
| MLF1     | 0        | 0.756295 | 0.859 | 0.329 | 0        | 4 | 0.358871 |
| MLLT1    | 0        | 0.575534 | 0.816 | 0.339 | 0        | 4 | 0.365907 |
| MMP2     | 0        | 0.26943  | 0.369 | 0.01  | 0        | 4 | 0.030098 |
| MMP24OS  | 3E-283   | 0.326895 | 0.59  | 0.209 | 1E-278   | 4 | 0.230091 |
| MORN2    | 0        | 0.572758 | 0.911 | 0.572 | 0        | 4 | 0.591379 |
| MORN5    | 0        | 0.288487 | 0.359 | 0.004 | 0        | 4 | 0.023418 |
| MRPS6    | 2.1E-289 | 0.667368 | 0.96  | 0.894 | 7.1E-285 | 4 | 0.897694 |
| MSI2     | 6.5E-198 | 0.378273 | 0.794 | 0.464 | 2.2E-193 | 4 | 0.482321 |
| MSN      | 1E-253   | 0.333655 | 0.609 | 0.237 | 3.3E-249 | 4 | 0.257525 |
| MSX1     | 0        | 0.953299 | 0.644 | 0.085 | 0        | 4 | 0.116414 |
| MYDGF    | 1.3E-123 | 0.276064 | 0.859 | 0.643 | 4.4E-119 | 4 | 0.655165 |
| MYL12A   | 0        | 0.600201 | 0.883 | 0.532 | 0        | 4 | 0.551295 |
| MYL6     | 0        | 0.667867 | 0.999 | 0.989 | 0        | 4 | 0.989553 |
| MYL9     | 0        | 0.483104 | 0.347 | 0.014 | 0        | 4 | 0.032124 |
| NAA38    | 2E-147   | 0.325696 | 0.912 | 0.742 | 6.9E-143 | 4 | 0.751039 |
| NAT14    | 4E-147   | 0.308265 | 0.858 | 0.609 | 1.4E-142 | 4 | 0.622579 |
| NDUFB5   | 7.1E-183 | 0.349308 | 0.931 | 0.772 | 2.4E-178 | 4 | 0.780711 |
| NEAT1    | 0        | 1.043106 | 0.803 | 0.192 | 0        | 4 | 0.226182 |
| NECAB2   | 0        | 0.263849 | 0.372 | 0.05  | 0        | 4 | 0.068192 |
| NELL2    | 7.4E-154 | 0.326357 | 0.73  | 0.386 | 2.5E-149 | 4 | 0.404996 |
| NENF     | 2.8E-116 | 0.282149 | 0.87  | 0.637 | 9.5E-112 | 4 | 0.650297 |
| NES      | 2.5E-110 | 0.542076 | 0.81  | 0.585 | 8.5E-106 | 4 | 0.598024 |
| NFE2L2   | 4.4E-110 | 0.264245 | 0.692 | 0.418 | 1.5E-105 | 4 | 0.433069 |
| NINJ1    | 4.6E-168 | 0.257658 | 0.623 | 0.298 | 1.6E-163 | 4 | 0.316336 |
| NMB      | 0        | 1.158189 | 0.667 | 0.252 | 0        | 4 | 0.275541 |
| NME5     | 0        | 0.30781  | 0.549 | 0.139 | 0        | 4 | 0.161863 |
| NMU      | 0        | 0.74398  | 0.425 | 0.112 | 0        | 4 | 0.129135 |
| NPC2     | 0        | 0.612813 | 0.921 | 0.574 | 0        | 4 | 0.593049 |
| NQO1     | 0        | 0.317197 | 0.397 | 0.039 | 0        | 4 | 0.058918 |
| NR2F1    | 0        | 0.890739 | 0.952 | 0.748 | 0        | 4 | 0.75907  |
| NR2F2    | 0        | 0.74952  | 0.882 | 0.374 | 0        | 4 | 0.402686 |
| NTRK2    | 0        | 0.889437 | 0.599 | 0.035 | 0        | 4 | 0.066735 |
| NUCB1    | 2.4E-213 | 0.339776 | 0.769 | 0.429 | 8.1E-209 | 4 | 0.447532 |
| NUCB2    | 2.5E-168 | 0.401465 | 0.862 | 0.652 | 8.2E-164 | 4 | 0.663551 |
| OBSL1    | 0        | 0.445659 | 0.731 | 0.324 | 0        | 4 | 0.346683 |
| OLFM2    | 6.8E-201 | 0.296554 | 0.765 | 0.365 | 2.3E-196 | 4 | 0.387335 |
| ORAI3    | 0        | 0.277684 | 0.477 | 0.111 | 0        | 4 | 0.131587 |
| OSBPL1A  | 0        | 0.545611 | 0.771 | 0.308 | 0        | 4 | 0.33421  |
| OST4     | 9.9E-258 | 0.376601 | 0.989 | 0.956 | 3.3E-253 | 4 | 0.958175 |
| OSTC     | 5E-160   | 0.331572 | 0.964 | 0.821 | 1.7E-155 | 4 | 0.829253 |
| OTX2     | 0        | 0.637009 | 0.677 | 0.017 | 0        | 4 | 0.05412  |
| P4HA1    | 5.2E-267 | 0.327635 | 0.59  | 0.216 | 1.7E-262 | 4 | 0.237198 |
| P4HB     | 4.3E-221 | 0.427243 | 0.937 | 0.769 | 1.4E-216 | 4 | 0.778011 |
| P4HTM    | 8.3E-241 | 0.349792 | 0.686 | 0.311 | 2.8E-236 | 4 | 0.332255 |

|           |          |          |       |       |          |   |          |
|-----------|----------|----------|-------|-------|----------|---|----------|
| PACRG     | 0        | 0.28581  | 0.425 | 0.039 | 0        | 4 | 0.060588 |
| PALLD     | 5.07E-89 | 0.315236 | 0.783 | 0.563 | 1.7E-84  | 4 | 0.575601 |
| PALMD     | 0        | 0.28163  | 0.396 | 0.042 | 0        | 4 | 0.061903 |
| PBXIP1    | 0        | 0.441618 | 0.625 | 0.151 | 0        | 4 | 0.177677 |
| PCBD1     | 0        | 0.492145 | 0.81  | 0.392 | 0        | 4 | 0.414875 |
| PCP4      | 0        | 1.819368 | 0.616 | 0.046 | 0        | 4 | 0.077751 |
| PCSK1N    | 4E-298   | 0.58502  | 0.985 | 0.863 | 1.3E-293 | 4 | 0.869408 |
| PDGFRB    | 0        | 0.260509 | 0.369 | 0.031 | 0        | 4 | 0.050283 |
| PDIA3     | 0        | 0.515149 | 0.941 | 0.749 | 0        | 4 | 0.759959 |
| PDIA4     | 4E-131   | 0.269209 | 0.685 | 0.392 | 1.3E-126 | 4 | 0.408266 |
| PDIA6     | 8.5E-152 | 0.304705 | 0.973 | 0.915 | 2.9E-147 | 4 | 0.918589 |
| PDLIM2    | 0        | 0.700139 | 0.866 | 0.326 | 0        | 4 | 0.356455 |
| PDLIM5    | 0        | 0.585568 | 0.744 | 0.147 | 0        | 4 | 0.180342 |
| PDLIM7    | 7.2E-176 | 0.430022 | 0.906 | 0.687 | 2.4E-171 | 4 | 0.699584 |
| PDPN      | 0        | 0.345692 | 0.428 | 0.019 | 0        | 4 | 0.041754 |
| PERP      | 0        | 0.321195 | 0.42  | 0.029 | 0        | 4 | 0.050709 |
| PEX2      | 3.8E-131 | 0.258722 | 0.694 | 0.394 | 1.3E-126 | 4 | 0.41054  |
| PFDN5     | 0        | 0.457836 | 0.995 | 0.982 | 0        | 4 | 0.982765 |
| PGLS      | 2.5E-220 | 0.372991 | 0.971 | 0.864 | 8.5E-216 | 4 | 0.869585 |
| PGM5P4-A' | 0        | 0.383843 | 0.256 | 0.001 | 0        | 4 | 0.015493 |
| PGRMC1    | 3.1E-158 | 0.32263  | 0.976 | 0.945 | 1.1E-153 | 4 | 0.947123 |
| PHPT1     | 5.9E-217 | 0.392108 | 0.988 | 0.964 | 2E-212   | 4 | 0.964998 |
| PIFO      | 0        | 0.744543 | 0.652 | 0.01  | 0        | 4 | 0.045734 |
| PIGP      | 1.3E-160 | 0.250682 | 0.573 | 0.26  | 4.4E-156 | 4 | 0.276998 |
| PIGT      | 3.1E-189 | 0.285702 | 0.649 | 0.312 | 1E-184   | 4 | 0.330692 |
| PLA2G16   | 0        | 0.326462 | 0.335 | 0.007 | 0        | 4 | 0.025337 |
| PLD3      | 8.5E-260 | 0.479034 | 0.934 | 0.718 | 2.9E-255 | 4 | 0.729967 |
| PLEKHA4   | 0        | 0.282708 | 0.382 | 0.014 | 0        | 4 | 0.034398 |
| PLEKHA5   | 2.47E-63 | 0.317096 | 0.838 | 0.684 | 8.28E-59 | 4 | 0.69301  |
| PLIN3     | 5.9E-223 | 0.369028 | 0.787 | 0.426 | 2E-218   | 4 | 0.44604  |
| PLS3      | 0        | 1.708216 | 0.807 | 0.318 | 0        | 4 | 0.345084 |
| PLTP      | 0        | 1.363269 | 0.932 | 0.366 | 0        | 4 | 0.397925 |
| PLXDC2    | 0        | 0.309941 | 0.505 | 0.087 | 0        | 4 | 0.110337 |
| PMP22     | 0        | 0.310534 | 0.423 | 0.082 | 0        | 4 | 0.100743 |
| POLR2L    | 2.3E-194 | 0.351043 | 0.978 | 0.915 | 7.6E-190 | 4 | 0.918446 |
| PON2      | 0        | 0.903418 | 0.856 | 0.415 | 0        | 4 | 0.44007  |
| PPDPF     | 0        | 0.605033 | 0.989 | 0.957 | 0        | 4 | 0.958601 |
| PIIB      | 2.9E-250 | 0.431275 | 0.969 | 0.873 | 9.6E-246 | 4 | 0.87854  |
| PPIC      | 0        | 0.388994 | 0.495 | 0.033 | 0        | 4 | 0.058953 |
| PPIL6     | 0        | 0.33104  | 0.518 | 0.113 | 0        | 4 | 0.135461 |
| PRCP      | 0        | 0.529504 | 0.704 | 0.167 | 0        | 4 | 0.196617 |
| PRDX3     | 2.5E-142 | 0.299348 | 0.922 | 0.757 | 8.2E-138 | 4 | 0.766284 |
| PRDX4     | 1.55E-89 | 0.253451 | 0.92  | 0.793 | 5.18E-85 | 4 | 0.800291 |
| PRDX5     | 1.3E-179 | 0.293188 | 0.994 | 0.971 | 4.3E-175 | 4 | 0.972211 |
| PRDX6     | 1E-272   | 0.489182 | 0.98  | 0.855 | 3.4E-268 | 4 | 0.862443 |
| PRNP      | 0        | 0.805172 | 0.745 | 0.243 | 0        | 4 | 0.270637 |
| PRPS1     | 6.5E-190 | 0.372749 | 0.697 | 0.369 | 2.2E-185 | 4 | 0.386838 |
| PRSS23    | 7.4E-146 | 0.321332 | 0.368 | 0.136 | 2.5E-141 | 4 | 0.148893 |

|           |          |          |       |       |          |   |          |
|-----------|----------|----------|-------|-------|----------|---|----------|
| PRTG      | 0        | 0.502311 | 0.52  | 0.054 | 0        | 4 | 0.080274 |
| PSAP      | 0        | 0.634953 | 0.899 | 0.489 | 0        | 4 | 0.51146  |
| PSENEEN   | 1.9E-237 | 0.393286 | 0.807 | 0.455 | 6.2E-233 | 4 | 0.474752 |
| PTGDS     | 0        | 0.370477 | 0.277 | 0.014 | 0        | 4 | 0.028286 |
| PTN       | 5.8E-175 | 1.650263 | 0.754 | 0.457 | 1.9E-170 | 4 | 0.474041 |
| PTPMT1    | 2E-200   | 0.266091 | 0.527 | 0.206 | 6.7E-196 | 4 | 0.223517 |
| PTTG1IP   | 1.5E-108 | 0.258936 | 0.828 | 0.59  | 5.1E-104 | 4 | 0.603568 |
| QPRT      | 0        | 0.441052 | 0.597 | 0.127 | 0        | 4 | 0.15298  |
| RAB11FIP1 | 0        | 0.293924 | 0.359 | 0.033 | 0        | 4 | 0.051668 |
| RAB13     | 7.2E-294 | 0.488102 | 0.921 | 0.581 | 2.4E-289 | 4 | 0.600085 |
| RAB32     | 0        | 0.320381 | 0.473 | 0.062 | 0        | 4 | 0.084965 |
| RAB34     | 1.2E-246 | 0.352799 | 0.672 | 0.3   | 4.2E-242 | 4 | 0.320635 |
| RABAC1    | 6.5E-188 | 0.334383 | 0.978 | 0.917 | 2.2E-183 | 4 | 0.920365 |
| RASSF8    | 4.4E-268 | 0.333001 | 0.553 | 0.195 | 1.5E-263 | 4 | 0.214882 |
| RBM47     | 0        | 0.764704 | 0.608 | 0.006 | 0        | 4 | 0.039906 |
| RBMS1     | 0        | 0.358215 | 0.501 | 0.048 | 0        | 4 | 0.073132 |
| RBP1      | 3.3E-184 | 0.416432 | 0.483 | 0.186 | 1.1E-179 | 4 | 0.202658 |
| RCN1      | 3E-276   | 0.488416 | 0.963 | 0.727 | 1E-271   | 4 | 0.739846 |
| RDX       | 1.3E-106 | 0.274302 | 0.912 | 0.761 | 4.4E-102 | 4 | 0.769838 |
| REEP3     | 3.2E-204 | 0.313817 | 0.682 | 0.328 | 1.1E-199 | 4 | 0.347927 |
| RGS5      | 0        | 0.302834 | 0.331 | 0.015 | 0        | 4 | 0.033119 |
| RGS9      | 0        | 0.290524 | 0.394 | 0.04  | 0        | 4 | 0.060161 |
| RHBDD2    | 1E-127   | 0.25831  | 0.742 | 0.456 | 3.4E-123 | 4 | 0.471732 |
| RHOA      | 2.7E-109 | 0.262059 | 0.961 | 0.847 | 9.1E-105 | 4 | 0.853488 |
| RHOC      | 0        | 0.781333 | 0.903 | 0.407 | 0        | 4 | 0.434953 |
| RNF13     | 4.7E-242 | 0.33676  | 0.688 | 0.313 | 1.6E-237 | 4 | 0.334316 |
| ROMO1     | 2.6E-104 | 0.264507 | 0.92  | 0.777 | 8.8E-100 | 4 | 0.78494  |
| RPS12     | 3.6E-200 | 0.311804 | 1     | 0.998 | 1.2E-195 | 4 | 0.998436 |
| RRAS      | 0        | 0.360762 | 0.542 | 0.108 | 0        | 4 | 0.132405 |
| RSPH1     | 0        | 0.466257 | 0.487 | 0.013 | 0        | 4 | 0.039586 |
| RSPO1     | 0        | 0.728658 | 0.602 | 0.004 | 0        | 4 | 0.036957 |
| RSPO2     | 0        | 1.72274  | 0.823 | 0.008 | 0        | 4 | 0.053907 |
| RSPO3     | 0        | 1.865086 | 0.807 | 0.156 | 0        | 4 | 0.192104 |
| S100A10   | 0        | 0.797954 | 0.443 | 0.035 | 0        | 4 | 0.058171 |
| S100A11   | 0        | 0.554234 | 0.358 | 0.016 | 0        | 4 | 0.03518  |
| S100A13   | 1.2E-266 | 0.321512 | 0.525 | 0.178 | 4E-262   | 4 | 0.197292 |
| S100A6    | 2.8E-163 | 0.334736 | 0.283 | 0.082 | 9.5E-159 | 4 | 0.092783 |
| S100B     | 0        | 0.801317 | 0.57  | 0.015 | 0        | 4 | 0.045734 |
| SARAF     | 3.8E-175 | 0.313353 | 0.985 | 0.915 | 1.3E-170 | 4 | 0.918979 |
| SAT1      | 7.52E-90 | 0.396648 | 0.649 | 0.424 | 2.52E-85 | 4 | 0.436907 |
| SCP2      | 5.8E-150 | 0.303178 | 0.839 | 0.575 | 1.9E-145 | 4 | 0.589283 |
| SDC2      | 0        | 0.923425 | 0.856 | 0.207 | 0        | 4 | 0.242884 |
| SDCBP     | 1.8E-112 | 0.287435 | 0.926 | 0.76  | 6.2E-108 | 4 | 0.769091 |
| SDSL      | 0        | 0.293848 | 0.422 | 0.015 | 0        | 4 | 0.037525 |
| SEC11A    | 0        | 0.678792 | 0.979 | 0.868 | 0        | 4 | 0.874276 |
| SEC61B    | 2.8E-146 | 0.273383 | 0.988 | 0.959 | 9.5E-142 | 4 | 0.960769 |
| SELENOF   | 6.6E-104 | 0.258431 | 0.847 | 0.65  | 2.2E-99  | 4 | 0.661455 |
| SELENOM   | 9.3E-239 | 0.50926  | 0.774 | 0.47  | 3.1E-234 | 4 | 0.487403 |

|          |          |          |       |       |          |   |          |
|----------|----------|----------|-------|-------|----------|---|----------|
| SELENOP  | 0        | 0.467352 | 0.609 | 0.1   | 0        | 4 | 0.128745 |
| SELENOW  | 6.7E-125 | 0.264203 | 0.969 | 0.873 | 2.2E-120 | 4 | 0.878149 |
| SERF2    | 0        | 0.659743 | 0.998 | 0.986 | 0        | 4 | 0.986923 |
| SERPINB6 | 0        | 0.332259 | 0.51  | 0.093 | 0        | 4 | 0.116343 |
| SERPINF1 | 0        | 0.340737 | 0.422 | 0.029 | 0        | 4 | 0.051349 |
| SERPINH1 | 0        | 0.489056 | 0.676 | 0.175 | 0        | 4 | 0.203191 |
| SESN3    | 1.3E-131 | 0.289501 | 0.693 | 0.403 | 4.4E-127 | 4 | 0.419317 |
| SFRP2    | 4.73E-06 | 0.267093 | 0.272 | 0.338 | 0.15875  | 4 | 0.334174 |
| SFT2D1   | 2.3E-180 | 0.276088 | 0.682 | 0.344 | 7.6E-176 | 4 | 0.363278 |
| SHTN1    | 0        | 0.358871 | 0.659 | 0.226 | 0        | 4 | 0.250524 |
| SIL1     | 1.3E-305 | 0.285667 | 0.504 | 0.147 | 4.2E-301 | 4 | 0.167123 |
| SIX3     | 0        | 0.512956 | 0.697 | 0.183 | 0        | 4 | 0.212004 |
| SLC1A3   | 5.72E-23 | 0.256779 | 0.349 | 0.248 | 1.92E-18 | 4 | 0.254078 |
| SLC22A17 | 1.2E-171 | 0.329081 | 0.797 | 0.488 | 4E-167   | 4 | 0.504922 |
| SLC25A39 | 1.1E-190 | 0.366687 | 0.845 | 0.6   | 3.7E-186 | 4 | 0.614122 |
| SLC2A4RG | 1.7E-144 | 0.290584 | 0.83  | 0.536 | 5.6E-140 | 4 | 0.552148 |
| SLC39A7  | 3.9E-129 | 0.292259 | 0.775 | 0.517 | 1.3E-124 | 4 | 0.531253 |
| SLC3A2   | 5.1E-150 | 0.379339 | 0.908 | 0.762 | 1.7E-145 | 4 | 0.770228 |
| SLC5A3   | 0        | 0.65373  | 0.733 | 0.341 | 0        | 4 | 0.363349 |
| SLC5A6   | 3.6E-220 | 0.325842 | 0.492 | 0.184 | 1.2E-215 | 4 | 0.201023 |
| SLC7A8   | 0        | 0.330277 | 0.384 | 0.016 | 0        | 4 | 0.036886 |
| SLC9A3R1 | 0        | 0.34033  | 0.534 | 0.103 | 0        | 4 | 0.126683 |
| SLIT2    | 0        | 0.65084  | 0.717 | 0.167 | 0        | 4 | 0.197257 |
| SLIT3    | 0        | 0.400545 | 0.494 | 0.01  | 0        | 4 | 0.037241 |
| SNHG18   | 0        | 0.312946 | 0.376 | 0.018 | 0        | 4 | 0.038058 |
| SNX17    | 1.3E-124 | 0.25542  | 0.808 | 0.531 | 4.2E-120 | 4 | 0.54664  |
| SOD1     | 7.2E-236 | 0.351669 | 0.989 | 0.954 | 2.4E-231 | 4 | 0.956007 |
| SPA17    | 5.8E-262 | 0.316391 | 0.578 | 0.208 | 1.9E-257 | 4 | 0.228919 |
| SPAG1    | 0        | 0.308169 | 0.439 | 0.043 | 0        | 4 | 0.065243 |
| SPAG16   | 2.1E-115 | 0.281251 | 0.806 | 0.559 | 7.1E-111 | 4 | 0.573149 |
| SPARC    | 0        | 1.056498 | 0.952 | 0.474 | 0        | 4 | 0.500586 |
| SPARCL1  | 0        | 1.711597 | 0.518 | 0.01  | 0        | 4 | 0.038662 |
| SPATA17  | 0        | 0.28109  | 0.414 | 0.047 | 0        | 4 | 0.067446 |
| SPATS2L  | 0        | 1.024287 | 0.85  | 0.291 | 0        | 4 | 0.32227  |
| SPCS1    | 4.6E-200 | 0.319274 | 0.978 | 0.92  | 1.5E-195 | 4 | 0.923102 |
| SPCS2    | 5.7E-149 | 0.271932 | 0.978 | 0.927 | 1.9E-144 | 4 | 0.929995 |
| SPINT2   | 3E-170   | 0.438087 | 0.688 | 0.377 | 1E-165   | 4 | 0.394229 |
| SPRY1    | 0        | 0.817373 | 0.643 | 0.032 | 0        | 4 | 0.06638  |
| SQSTM1   | 2.9E-131 | 0.301296 | 0.768 | 0.494 | 9.7E-127 | 4 | 0.509577 |
| SRP14    | 3.8E-255 | 0.276167 | 0.999 | 0.995 | 1.3E-250 | 4 | 0.995451 |
| SSR3     | 2.9E-139 | 0.307069 | 0.849 | 0.632 | 9.8E-135 | 4 | 0.644149 |
| SSR4     | 5.8E-191 | 0.374515 | 0.971 | 0.908 | 1.9E-186 | 4 | 0.911553 |
| STAT3    | 7.3E-143 | 0.250732 | 0.627 | 0.316 | 2.4E-138 | 4 | 0.333819 |
| STK33    | 6.8E-283 | 0.250341 | 0.492 | 0.146 | 2.3E-278 | 4 | 0.165239 |
| SULF1    | 0        | 0.961054 | 0.665 | 0.008 | 0        | 4 | 0.04513  |
| SULF2    | 1.6E-263 | 0.332217 | 0.49  | 0.151 | 5.5E-259 | 4 | 0.170321 |
| SWI5     | 1.5E-176 | 0.2673   | 0.676 | 0.332 | 4.9E-172 | 4 | 0.351125 |
| SYT17    | 0        | 0.282108 | 0.41  | 0.053 | 0        | 4 | 0.07338  |

|           |          |          |       |       |          |   |          |
|-----------|----------|----------|-------|-------|----------|---|----------|
| TAGLN     | 0        | 1.264499 | 0.279 | 0.033 | 0        | 4 | 0.047155 |
| TAGLN2    | 9.1E-143 | 0.393366 | 0.538 | 0.261 | 3.1E-138 | 4 | 0.276749 |
| TAX1BP1   | 7E-147   | 0.304856 | 0.784 | 0.503 | 2.3E-142 | 4 | 0.518496 |
| TCEAL9    | 1.33E-91 | 0.269201 | 0.901 | 0.752 | 4.47E-87 | 4 | 0.760741 |
| TCTN1     | 0        | 0.443891 | 0.771 | 0.367 | 0        | 4 | 0.389858 |
| TECR      | 4.9E-104 | 0.2691   | 0.912 | 0.791 | 1.6E-99  | 4 | 0.797697 |
| TENM3     | 0        | 0.38784  | 0.619 | 0.195 | 0        | 4 | 0.218471 |
| TEX264    | 2.3E-186 | 0.291084 | 0.675 | 0.336 | 7.8E-182 | 4 | 0.354927 |
| TGIF1     | 2.9E-146 | 0.315946 | 0.761 | 0.452 | 9.6E-142 | 4 | 0.46928  |
| TIMP1     | 9.1E-245 | 0.591565 | 0.683 | 0.355 | 3E-240   | 4 | 0.37369  |
| TIMP2     | 1.2E-122 | 0.290155 | 0.727 | 0.461 | 3.9E-118 | 4 | 0.476067 |
| TIMP3     | 0        | 0.471171 | 0.529 | 0.053 | 0        | 4 | 0.079421 |
| TLN1      | 4.1E-214 | 0.287589 | 0.604 | 0.256 | 1.4E-209 | 4 | 0.275328 |
| TM2D1     | 7.9E-177 | 0.303661 | 0.737 | 0.418 | 2.7E-172 | 4 | 0.43545  |
| TM7SF2    | 2.4E-284 | 0.515893 | 0.95  | 0.707 | 8.2E-280 | 4 | 0.72023  |
| TMBIM4    | 0        | 0.624863 | 0.896 | 0.533 | 0        | 4 | 0.553463 |
| TMBIM6    | 0        | 0.450027 | 0.982 | 0.932 | 0        | 4 | 0.935219 |
| TMCO1     | 7.5E-198 | 0.362853 | 0.922 | 0.719 | 2.5E-193 | 4 | 0.730713 |
| TMED1     | 2.2E-266 | 0.332213 | 0.671 | 0.278 | 7.2E-262 | 4 | 0.30006  |
| TMED10    | 3.4E-212 | 0.389103 | 0.862 | 0.606 | 1.2E-207 | 4 | 0.620625 |
| TMED4     | 4E-204   | 0.35988  | 0.851 | 0.549 | 1.4E-199 | 4 | 0.566149 |
| TMED9     | 0        | 0.528845 | 0.943 | 0.727 | 0        | 4 | 0.738993 |
| TMEM134   | 6.1E-174 | 0.299892 | 0.748 | 0.42  | 2.1E-169 | 4 | 0.438684 |
| TMEM141   | 3.9E-158 | 0.281958 | 0.719 | 0.406 | 1.3E-153 | 4 | 0.42351  |
| TMEM147   | 8.8E-190 | 0.338467 | 0.931 | 0.759 | 2.9E-185 | 4 | 0.768132 |
| TMEM14C   | 3.9E-176 | 0.330258 | 0.951 | 0.794 | 1.3E-171 | 4 | 0.803063 |
| TMEM179E  | 0        | 0.450826 | 0.789 | 0.371 | 0        | 4 | 0.394194 |
| TMEM205   | 0        | 0.661938 | 0.831 | 0.441 | 0        | 4 | 0.462492 |
| TMEM208   | 1.6E-142 | 0.28287  | 0.828 | 0.561 | 5.3E-138 | 4 | 0.575744 |
| TMEM230   | 2.3E-243 | 0.408403 | 0.898 | 0.628 | 7.7E-239 | 4 | 0.64287  |
| TMEM256   | 4.2E-252 | 0.444031 | 0.896 | 0.623 | 1.4E-247 | 4 | 0.638641 |
| TMEM50B   | 1.1E-207 | 0.271813 | 0.609 | 0.255 | 3.5E-203 | 4 | 0.275186 |
| TMEM59    | 1.7E-160 | 0.328849 | 0.942 | 0.816 | 5.7E-156 | 4 | 0.823318 |
| TMEM9     | 9.3E-158 | 0.306351 | 0.856 | 0.594 | 3.1E-153 | 4 | 0.608685 |
| TMEM98    | 6.7E-105 | 0.253533 | 0.914 | 0.721 | 2.2E-100 | 4 | 0.731673 |
| TNFRSF12A | 2.3E-281 | 0.442577 | 0.324 | 0.07  | 7.6E-277 | 4 | 0.084325 |
| TNFRSF1A  | 0        | 0.475073 | 0.66  | 0.087 | 0        | 4 | 0.118724 |
| TOMM7     | 7.8E-122 | 0.266343 | 0.985 | 0.949 | 2.6E-117 | 4 | 0.951068 |
| TP53I13   | 1.7E-156 | 0.293252 | 0.737 | 0.427 | 5.7E-152 | 4 | 0.444689 |
| TPBG      | 0        | 2.188924 | 0.961 | 0.143 | 0        | 4 | 0.188373 |
| TPM1      | 7E-118   | 0.942717 | 0.889 | 0.771 | 2.4E-113 | 4 | 0.778046 |
| TPM2      | 0        | 0.780789 | 0.476 | 0.033 | 0        | 4 | 0.057994 |
| TPP1      | 0        | 0.279199 | 0.494 | 0.113 | 0        | 4 | 0.134217 |
| TPPP3     | 0        | 0.250214 | 0.233 | 0.019 | 0        | 4 | 0.031022 |
| TPT1      | 2.3E-221 | 0.269813 | 0.999 | 0.998 | 7.6E-217 | 4 | 0.997903 |
| TRAM1     | 9E-142   | 0.265305 | 0.686 | 0.382 | 3E-137   | 4 | 0.39924  |
| TRH       | 0        | 1.120132 | 0.262 | 0.014 | 0        | 4 | 0.027469 |
| TRMT112   | 3.6E-159 | 0.309216 | 0.969 | 0.851 | 1.2E-154 | 4 | 0.85761  |



|            |          |          |       |       |          |   |          |
|------------|----------|----------|-------|-------|----------|---|----------|
| TRPM3      | 0        | 1.956077 | 0.65  | 0.05  | 0        | 4 | 0.083224 |
| TSC22D3    | 1.4E-221 | 0.282764 | 0.546 | 0.198 | 4.7E-217 | 4 | 0.217263 |
| TSHZ2      | 0        | 0.485622 | 0.679 | 0.206 | 0        | 4 | 0.232401 |
| TSPAN3     | 5.1E-250 | 0.390581 | 0.973 | 0.864 | 1.7E-245 | 4 | 0.869941 |
| TSPAN4     | 4.3E-148 | 0.301347 | 0.753 | 0.466 | 1.5E-143 | 4 | 0.482286 |
| TSPAN6     | 1.1E-141 | 0.286515 | 0.795 | 0.493 | 3.6E-137 | 4 | 0.510252 |
| TSTD1      | 0        | 0.503364 | 0.422 | 0.072 | 0        | 4 | 0.091255 |
| TTR        | 0        | 4.539866 | 0.663 | 0.167 | 0        | 4 | 0.194592 |
| TUBA1C     | 7.8E-224 | 0.337525 | 0.389 | 0.112 | 2.6E-219 | 4 | 0.127465 |
| TUSC3      | 3.9E-191 | 0.374696 | 0.888 | 0.665 | 1.3E-186 | 4 | 0.677126 |
| UBB        | 4.1E-203 | 0.348953 | 0.995 | 0.955 | 1.4E-198 | 4 | 0.95686  |
| UBL5       | 5.1E-204 | 0.301994 | 0.996 | 0.978 | 1.7E-199 | 4 | 0.979105 |
| UBXN4      | 7.7E-161 | 0.308576 | 0.956 | 0.858 | 2.6E-156 | 4 | 0.863793 |
| UQCR11     | 9.4E-154 | 0.268136 | 0.987 | 0.961 | 3.1E-149 | 4 | 0.962226 |
| VASN       | 0        | 0.297306 | 0.403 | 0.027 | 0        | 4 | 0.048257 |
| VCL        | 2.6E-226 | 0.329516 | 0.57  | 0.229 | 8.8E-222 | 4 | 0.247681 |
| VGLL4      | 4.8E-301 | 0.499868 | 0.898 | 0.607 | 1.6E-296 | 4 | 0.623077 |
| WASF2      | 1.3E-291 | 0.43839  | 0.828 | 0.461 | 4.5E-287 | 4 | 0.481326 |
| WDR83OS    | 1.8E-150 | 0.287172 | 0.961 | 0.873 | 6.1E-146 | 4 | 0.877758 |
| WLS        | 0        | 1.914733 | 0.968 | 0.208 | 0        | 4 | 0.249991 |
| WNT2B      | 0        | 0.763683 | 0.604 | 0.086 | 0        | 4 | 0.114637 |
| WNT5A      | 0        | 0.328825 | 0.422 | 0.038 | 0        | 4 | 0.059699 |
| WWTR1      | 0        | 0.341906 | 0.454 | 0.023 | 0        | 4 | 0.047084 |
| YIF1A      | 1.8E-168 | 0.332441 | 0.838 | 0.563 | 6.2E-164 | 4 | 0.578729 |
| ZFP36L2    | 0        | 0.961986 | 0.858 | 0.48  | 0        | 4 | 0.500657 |
| ZFYVE16    | 0        | 0.731255 | 0.76  | 0.317 | 0        | 4 | 0.341601 |
| ZIC1       | 0        | 0.757081 | 0.683 | 0.03  | 0        | 4 | 0.066202 |
| ZIC4       | 0        | 0.455787 | 0.47  | 0.005 | 0        | 4 | 0.03088  |
| ZMYND10    | 0        | 0.414308 | 0.462 | 0.02  | 0        | 4 | 0.045094 |
| ZNF503     | 0        | 1.037554 | 0.844 | 0.082 | 0        | 4 | 0.124658 |
| ZNF503-AS1 | 0        | 0.321828 | 0.416 | 0.022 | 0        | 4 | 0.044384 |
| ZNF521     | 0        | 0.471046 | 0.669 | 0.198 | 0        | 4 | 0.22405  |
| ZNHIT1     | 5.2E-174 | 0.344165 | 0.945 | 0.821 | 1.7E-169 | 4 | 0.8284   |
| AAMDC      | 4.44E-30 | 0.268478 | 0.609 | 0.481 | 1.49E-25 | 5 | 0.485626 |
| ABCD4      | 4.1E-138 | 0.389169 | 0.682 | 0.382 | 1.4E-133 | 5 | 0.394122 |
| AES        | 4.2E-101 | 0.337481 | 0.97  | 0.905 | 1.42E-96 | 5 | 0.907502 |
| AFDN       | 3.1E-145 | 0.41121  | 0.962 | 0.832 | 1E-140   | 5 | 0.837106 |
| AGO1       | 4.4E-123 | 0.370423 | 0.782 | 0.51  | 1.5E-118 | 5 | 0.520308 |
| AL139393   | 5.83E-86 | 0.269573 | 0.333 | 0.134 | 1.96E-81 | 5 | 0.14207  |
| AMOTL2     | 0        | 0.761558 | 0.82  | 0.255 | 0        | 5 | 0.276714 |
| ANP32E     | 2.01E-48 | 0.290686 | 0.874 | 0.747 | 6.74E-44 | 5 | 0.751857 |
| ARHGEF26   | 5.5E-147 | 0.268017 | 0.465 | 0.173 | 1.8E-142 | 5 | 0.184784 |
| ARID4B     | 3.08E-80 | 0.279904 | 0.932 | 0.831 | 1.03E-75 | 5 | 0.835045 |
| ARL4D      | 1.4E-243 | 0.754924 | 0.759 | 0.368 | 4.8E-239 | 5 | 0.383142 |
| ASCL1      | 0        | 0.674137 | 0.621 | 0.165 | 0        | 5 | 0.183114 |
| ASPM       | 1.24E-23 | 0.28264  | 0.463 | 0.33  | 4.14E-19 | 5 | 0.335383 |
| ATP6V0E1   | 3.12E-89 | 0.320193 | 0.891 | 0.748 | 1.05E-84 | 5 | 0.753314 |
| ATP6V1G1   | 1.36E-93 | 0.265248 | 0.991 | 0.967 | 4.57E-89 | 5 | 0.967983 |

|          |          |          |       |       |          |   |          |
|----------|----------|----------|-------|-------|----------|---|----------|
| BAZ1A    | 5.1E-122 | 0.38015  | 0.888 | 0.674 | 1.7E-117 | 5 | 0.682385 |
| BCL7A    | 1.13E-79 | 0.308007 | 0.845 | 0.675 | 3.78E-75 | 5 | 0.681959 |
| BEND5    | 6.17E-75 | 0.267529 | 0.7   | 0.46  | 2.07E-70 | 5 | 0.468889 |
| BIRC5    | 3.29E-39 | 0.322591 | 0.631 | 0.454 | 1.1E-34  | 5 | 0.460822 |
| BNIP3    | 1.35E-25 | 0.333032 | 0.739 | 0.62  | 4.53E-21 | 5 | 0.625031 |
| BTBD17   | 2.39E-36 | 0.263927 | 0.617 | 0.469 | 8.01E-32 | 5 | 0.474965 |
| CACNA2D1 | 1.5E-198 | 0.302956 | 0.559 | 0.181 | 5.1E-194 | 5 | 0.195835 |
| CARHSP1  | 6.2E-102 | 0.359879 | 0.947 | 0.887 | 2.09E-97 | 5 | 0.889201 |
| CASC15   | 7.92E-88 | 0.281085 | 0.608 | 0.347 | 2.66E-83 | 5 | 0.357414 |
| CBFA2T2  | 0        | 0.597515 | 0.753 | 0.217 | 0        | 5 | 0.237838 |
| CCDC88C  | 1.1E-193 | 0.366237 | 0.573 | 0.22  | 3.7E-189 | 5 | 0.233751 |
| CCNB1    | 1.72E-21 | 0.287452 | 0.447 | 0.326 | 5.78E-17 | 5 | 0.330905 |
| CCNB2    | 3.47E-40 | 0.372409 | 0.599 | 0.421 | 1.16E-35 | 5 | 0.428414 |
| CD200    | 1.7E-120 | 0.296669 | 0.628 | 0.305 | 5.6E-116 | 5 | 0.317757 |
| CD24     | 2E-106   | 0.316113 | 0.968 | 0.833 | 6.6E-102 | 5 | 0.837959 |
| CDC42EP4 | 1.96E-63 | 0.253753 | 0.656 | 0.429 | 6.59E-59 | 5 | 0.438257 |
| CDK1     | 1.93E-42 | 0.364882 | 0.508 | 0.347 | 6.47E-38 | 5 | 0.353506 |
| CDKN1C   | 4.23E-58 | 0.325998 | 0.449 | 0.236 | 1.42E-53 | 5 | 0.244448 |
| CENPE    | 7.58E-31 | 0.339709 | 0.384 | 0.245 | 2.54E-26 | 5 | 0.250133 |
| CENPF    | 1.3E-42  | 0.455767 | 0.712 | 0.552 | 4.36E-38 | 5 | 0.558473 |
| CENPU    | 9.77E-65 | 0.413674 | 0.718 | 0.559 | 3.28E-60 | 5 | 0.564976 |
| CENPW    | 5.96E-43 | 0.436458 | 0.618 | 0.511 | 2E-38    | 5 | 0.515085 |
| CFAP298  | 0        | 1.344781 | 0.968 | 0.646 | 0        | 5 | 0.658719 |
| CHD7     | 0        | 0.802161 | 0.971 | 0.718 | 0        | 5 | 0.727906 |
| CHRNA3   | 0        | 0.339739 | 0.33  | 0.027 | 0        | 5 | 0.039018 |
| CKB      | 6.78E-56 | 0.306355 | 0.999 | 0.995 | 2.28E-51 | 5 | 0.995451 |
| CKS1B    | 7.57E-27 | 0.351023 | 0.703 | 0.624 | 2.54E-22 | 5 | 0.627519 |
| CKS2     | 3.66E-57 | 0.321016 | 0.828 | 0.664 | 1.23E-52 | 5 | 0.670587 |
| CMC1     | 2.9E-155 | 0.406983 | 0.767 | 0.47  | 9.7E-151 | 5 | 0.48193  |
| CNIH4    | 4.56E-93 | 0.315246 | 0.801 | 0.581 | 1.53E-88 | 5 | 0.589993 |
| CNTLN    | 1.17E-78 | 0.363595 | 0.691 | 0.485 | 3.93E-74 | 5 | 0.493479 |
| CORO1C   | 1E-105   | 0.291423 | 0.632 | 0.344 | 3.4E-101 | 5 | 0.354927 |
| COX17    | 9.94E-95 | 0.378496 | 0.796 | 0.61  | 3.33E-90 | 5 | 0.617675 |
| CRABP1   | 1.56E-64 | 0.326622 | 0.29  | 0.119 | 5.24E-60 | 5 | 0.125262 |
| CRIPT    | 6.14E-84 | 0.29203  | 0.702 | 0.458 | 2.06E-79 | 5 | 0.46729  |
| CRNDE    | 2.91E-86 | 0.318395 | 0.503 | 0.263 | 9.76E-82 | 5 | 0.272378 |
| CUL1     | 6.1E-108 | 0.352193 | 0.762 | 0.513 | 2E-103   | 5 | 0.52276  |
| DACH1    | 1.55E-84 | 0.329374 | 0.89  | 0.661 | 5.21E-80 | 5 | 0.669877 |
| DDX5     | 3.2E-169 | 0.341826 | 0.997 | 0.99  | 1.1E-164 | 5 | 0.990441 |
| DENND1B  | 2.9E-197 | 0.286701 | 0.48  | 0.149 | 9.7E-193 | 5 | 0.162183 |
| DLGAP5   | 8.88E-40 | 0.320632 | 0.431 | 0.262 | 2.98E-35 | 5 | 0.268718 |
| DLL1     | 0        | 1.618055 | 0.968 | 0.204 | 0        | 5 | 0.233787 |
| DLL3     | 3.2E-235 | 0.903678 | 0.651 | 0.26  | 1.1E-230 | 5 | 0.274795 |
| DMRTA1   | 7.7E-178 | 0.531377 | 0.711 | 0.365 | 2.6E-173 | 5 | 0.378451 |
| DNAJA1   | 2.6E-130 | 0.314669 | 0.995 | 0.973 | 8.6E-126 | 5 | 0.974024 |
| DUSP23   | 4.8E-116 | 0.40624  | 0.542 | 0.274 | 1.6E-111 | 5 | 0.284567 |
| E2F1     | 1.1E-113 | 0.455042 | 0.593 | 0.32  | 3.8E-109 | 5 | 0.330337 |
| EBF2     | 0        | 0.505517 | 0.514 | 0.068 | 0        | 5 | 0.085747 |

|           |          |          |       |       |          |   |          |
|-----------|----------|----------|-------|-------|----------|---|----------|
| EFS       | 6.3E-221 | 0.460847 | 0.75  | 0.363 | 2.1E-216 | 5 | 0.377918 |
| EIF4A1    | 5.2E-93  | 0.307545 | 0.981 | 0.93  | 1.74E-88 | 5 | 0.932199 |
| ELAVL2    | 0        | 0.790387 | 0.778 | 0.252 | 0        | 5 | 0.272236 |
| ELAVL3    | 8.3E-130 | 0.50174  | 0.911 | 0.72  | 2.8E-125 | 5 | 0.727302 |
| ELAVL4    | 0        | 0.794979 | 0.934 | 0.376 | 0        | 5 | 0.398245 |
| EMX1      | 0        | 0.85048  | 0.977 | 0.759 | 0        | 5 | 0.767954 |
| ENY2      | 5.5E-159 | 0.364338 | 0.987 | 0.926 | 1.8E-154 | 5 | 0.928752 |
| EOMES     | 0        | 1.130479 | 0.752 | 0.055 | 0        | 5 | 0.082229 |
| EYA2      | 0        | 0.514704 | 0.483 | 0.049 | 0        | 5 | 0.065811 |
| EZH2      | 8.2E-119 | 0.382178 | 0.887 | 0.697 | 2.7E-114 | 5 | 0.704488 |
| EZR       | 9.3E-132 | 0.408205 | 0.928 | 0.721 | 3.1E-127 | 5 | 0.729256 |
| FBLN1     | 5.28E-69 | 0.281884 | 0.929 | 0.773 | 1.77E-64 | 5 | 0.779041 |
| FEZF2     | 2.2E-117 | 0.535611 | 0.943 | 0.782 | 7.2E-113 | 5 | 0.788494 |
| FYN       | 3.1E-287 | 0.706793 | 0.97  | 0.799 | 1E-282   | 5 | 0.805408 |
| GADD45A   | 0        | 1.122348 | 0.807 | 0.286 | 0        | 5 | 0.306706 |
| GADD45G   | 0        | 1.584393 | 0.95  | 0.204 | 0        | 5 | 0.233396 |
| GLUL      | 4E-178   | 0.546666 | 0.945 | 0.765 | 1.4E-173 | 5 | 0.772076 |
| GNG5      | 4.7E-142 | 0.403138 | 0.97  | 0.827 | 1.6E-137 | 5 | 0.83238  |
| GPC2      | 2E-122   | 0.330676 | 0.803 | 0.488 | 6.7E-118 | 5 | 0.50048  |
| GTF2F2    | 7.2E-80  | 0.312656 | 0.815 | 0.636 | 2.41E-75 | 5 | 0.642657 |
| GTSE1     | 4.38E-42 | 0.28722  | 0.431 | 0.262 | 1.47E-37 | 5 | 0.268292 |
| H1FX      | 9.3E-83  | 0.334155 | 0.997 | 0.982 | 3.12E-78 | 5 | 0.982197 |
| H2AFV     | 3.35E-64 | 0.270569 | 0.965 | 0.885 | 1.12E-59 | 5 | 0.888312 |
| H2AFY     | 1.6E-115 | 0.301885 | 0.991 | 0.966 | 5.3E-111 | 5 | 0.966952 |
| H3F3A     | 1.2E-267 | 0.264462 | 1     | 0.999 | 4.2E-263 | 5 | 0.999076 |
| H3F3B     | 5.9E-294 | 0.568915 | 1     | 0.995 | 2E-289   | 5 | 0.995594 |
| HDAC2     | 2.8E-160 | 0.371379 | 0.987 | 0.94  | 9.4E-156 | 5 | 0.94222  |
| HES5      | 2.59E-60 | 1.093328 | 0.682 | 0.61  | 8.67E-56 | 5 | 0.612594 |
| HES6      | 0        | 2.377791 | 1     | 0.883 | 0        | 5 | 0.887246 |
| HIST1H1C  | 3.25E-21 | 0.313305 | 0.513 | 0.402 | 1.09E-16 | 5 | 0.406098 |
| HIST1H1D  | 4.88E-17 | 0.276902 | 0.348 | 0.248 | 1.64E-12 | 5 | 0.251661 |
| HIST1H2BH | 5.08E-46 | 0.252336 | 0.47  | 0.289 | 1.7E-41  | 5 | 0.296223 |
| HIST1H4C  | 0.000463 | 0.321181 | 0.907 | 0.953 | 1        | 5 | 0.951068 |
| HMGB1     | 1.28E-83 | 0.326998 | 1     | 0.998 | 4.3E-79  | 5 | 0.998543 |
| HMGB2     | 8.69E-57 | 0.574032 | 0.789 | 0.669 | 2.91E-52 | 5 | 0.673501 |
| HMGB3     | 3.23E-76 | 0.298566 | 0.966 | 0.9   | 1.08E-71 | 5 | 0.902882 |
| HMGN2     | 4.7E-115 | 0.462616 | 0.997 | 0.986 | 1.6E-110 | 5 | 0.986816 |
| HMMR      | 1.77E-48 | 0.301648 | 0.379 | 0.208 | 5.92E-44 | 5 | 0.214882 |
| HNRNPA0   | 1.3E-102 | 0.300874 | 0.978 | 0.931 | 4.34E-98 | 5 | 0.932696 |
| HNRNPA2B  | 2.6E-95  | 0.260417 | 1     | 0.996 | 8.72E-91 | 5 | 0.996553 |
| HNRNPAB   | 2.1E-166 | 0.442319 | 0.98  | 0.899 | 7.1E-162 | 5 | 0.902136 |
| HNRNPDL   | 1.06E-97 | 0.260335 | 0.997 | 0.984 | 3.54E-93 | 5 | 0.984258 |
| HNRNPH3   | 3.1E-106 | 0.284072 | 0.991 | 0.96  | 1E-101   | 5 | 0.961373 |
| HNRNPM    | 2.1E-108 | 0.311381 | 0.992 | 0.94  | 7.1E-104 | 5 | 0.942006 |
| HPCAL1    | 1.1E-110 | 0.290844 | 0.679 | 0.366 | 3.5E-106 | 5 | 0.377954 |
| HSP90AA1  | 2.3E-151 | 0.340585 | 1     | 0.997 | 7.6E-147 | 5 | 0.997548 |
| HSPH1     | 3.97E-64 | 0.27188  | 0.752 | 0.564 | 1.33E-59 | 5 | 0.571373 |
| HUNK      | 1.1E-230 | 0.344065 | 0.497 | 0.146 | 3.5E-226 | 5 | 0.159625 |

|           |          |          |       |       |          |   |          |
|-----------|----------|----------|-------|-------|----------|---|----------|
| IDH2      | 3.4E-136 | 0.397106 | 0.959 | 0.861 | 1.2E-131 | 5 | 0.864397 |
| IGFBP2    | 1.45E-95 | 0.523513 | 0.995 | 0.976 | 4.85E-91 | 5 | 0.977115 |
| IGFBPL1   | 0        | 0.48994  | 0.722 | 0.206 | 0        | 5 | 0.226467 |
| INSM1     | 0        | 1.014885 | 0.698 | 0.126 | 0        | 5 | 0.147898 |
| IVNS1ABP  | 1.82E-81 | 0.33055  | 0.861 | 0.672 | 6.09E-77 | 5 | 0.679684 |
| JPT1      | 1.57E-90 | 0.290259 | 0.999 | 0.986 | 5.28E-86 | 5 | 0.986745 |
| KALRN     | 4E-158   | 0.315466 | 0.555 | 0.218 | 1.3E-153 | 5 | 0.231157 |
| KAT6B     | 1.3E-108 | 0.40643  | 0.835 | 0.638 | 4.3E-104 | 5 | 0.645322 |
| KCNQ2     | 8.7E-112 | 0.352735 | 0.894 | 0.68  | 2.9E-107 | 5 | 0.688426 |
| KDM1A     | 5.41E-82 | 0.289856 | 0.913 | 0.778 | 1.81E-77 | 5 | 0.783519 |
| KDM5B     | 1.02E-61 | 0.288987 | 0.88  | 0.749 | 3.41E-57 | 5 | 0.754167 |
| KHDRBS1   | 8.7E-122 | 0.303299 | 0.992 | 0.961 | 2.9E-117 | 5 | 0.962368 |
| KIF5B     | 1.05E-80 | 0.28567  | 0.98  | 0.94  | 3.52E-76 | 5 | 0.941225 |
| KLHDC8A   | 1.2E-259 | 0.593878 | 0.767 | 0.355 | 4.1E-255 | 5 | 0.371309 |
| KPNA2     | 1.37E-42 | 0.356181 | 0.81  | 0.692 | 4.6E-38  | 5 | 0.696741 |
| KRR1      | 5.51E-74 | 0.273104 | 0.744 | 0.556 | 1.85E-69 | 5 | 0.56288  |
| LHX2      | 2.1E-125 | 0.394194 | 0.994 | 0.922 | 7.2E-121 | 5 | 0.924701 |
| LHX9      | 0        | 0.525659 | 0.496 | 0.062 | 0        | 5 | 0.07896  |
| LIMD2     | 1.21E-81 | 0.288983 | 0.868 | 0.682 | 4.04E-77 | 5 | 0.688959 |
| LINC01088 | 0        | 0.423287 | 0.441 | 0.046 | 0        | 5 | 0.06176  |
| LZTS1     | 0        | 0.788733 | 0.725 | 0.136 | 0        | 5 | 0.159056 |
| MAD2L1    | 2.67E-54 | 0.414451 | 0.649 | 0.507 | 8.96E-50 | 5 | 0.51281  |
| MAGI1     | 1.9E-222 | 0.524746 | 0.864 | 0.516 | 6.3E-218 | 5 | 0.529263 |
| MAML3     | 7E-109   | 0.259398 | 0.505 | 0.23  | 2.3E-104 | 5 | 0.24029  |
| MAP4K4    | 1.3E-201 | 0.597573 | 0.961 | 0.786 | 4.5E-197 | 5 | 0.793184 |
| MAPKAPK2  | 7.4E-171 | 0.308263 | 0.539 | 0.207 | 2.5E-166 | 5 | 0.220355 |
| MARCKS    | 4.2E-236 | 0.402932 | 1     | 0.997 | 1.4E-231 | 5 | 0.997193 |
| MBD2      | 7E-184   | 0.431422 | 0.756 | 0.406 | 2.4E-179 | 5 | 0.419992 |
| MEST      | 5E-146   | 0.329621 | 0.616 | 0.27  | 1.7E-141 | 5 | 0.283359 |
| MEX3A     | 2.5E-130 | 0.372981 | 0.936 | 0.785 | 8.3E-126 | 5 | 0.790946 |
| MFAP4     | 0        | 0.733062 | 0.669 | 0.116 | 0        | 5 | 0.137344 |
| MFNG      | 0        | 0.718789 | 0.726 | 0.068 | 0        | 5 | 0.093707 |
| MIAT      | 3.9E-139 | 0.430748 | 0.705 | 0.363 | 1.3E-134 | 5 | 0.376035 |
| MKI67     | 8.75E-35 | 0.366154 | 0.533 | 0.378 | 2.94E-30 | 5 | 0.384386 |
| MLLT11    | 9.3E-144 | 0.30219  | 0.987 | 0.831 | 3.1E-139 | 5 | 0.836751 |
| MRPL42    | 1.01E-84 | 0.290409 | 0.898 | 0.736 | 3.38E-80 | 5 | 0.742653 |
| MYCL      | 0        | 0.657634 | 0.63  | 0.109 | 0        | 5 | 0.129135 |
| MYO10     | 2.79E-53 | 0.263887 | 0.789 | 0.61  | 9.37E-49 | 5 | 0.617427 |
| MYO1B     | 8.3E-186 | 0.409522 | 0.635 | 0.277 | 2.8E-181 | 5 | 0.290857 |
| MZT1      | 2.22E-26 | 0.277661 | 0.6   | 0.495 | 7.43E-22 | 5 | 0.499485 |
| NCAPG     | 1.08E-46 | 0.276252 | 0.462 | 0.29  | 3.62E-42 | 5 | 0.297075 |
| NDUFA6    | 2.73E-76 | 0.266331 | 0.953 | 0.911 | 9.15E-72 | 5 | 0.912938 |
| NDUFC2    | 1.2E-153 | 0.37906  | 0.992 | 0.978 | 4E-149   | 5 | 0.97843  |
| NEURL1B   | 0        | 0.372566 | 0.484 | 0.078 | 0        | 5 | 0.093493 |
| NEUROD1   | 1.2E-274 | 0.374669 | 0.455 | 0.102 | 4E-270   | 5 | 0.115419 |
| NEUROD4   | 0        | 1.122842 | 0.699 | 0.017 | 0        | 5 | 0.043211 |
| NEUROG1   | 0        | 1.12091  | 0.614 | 0.021 | 0        | 5 | 0.044135 |
| NEUROG2   | 0        | 1.066077 | 0.958 | 0.522 | 0        | 5 | 0.539    |

|          |          |          |       |       |          |   |          |
|----------|----------|----------|-------|-------|----------|---|----------|
| NFIB     | 3.1E-140 | 0.325064 | 0.976 | 0.857 | 1E-135   | 5 | 0.861483 |
| NHLH1    | 0        | 1.140619 | 0.845 | 0.151 | 0        | 5 | 0.177748 |
| NKAIN3   | 1.31E-95 | 0.348847 | 0.76  | 0.509 | 4.39E-91 | 5 | 0.51839  |
| NNAT     | 4.1E-123 | 0.530737 | 0.882 | 0.654 | 1.4E-118 | 5 | 0.662805 |
| NUF2     | 2.55E-51 | 0.343202 | 0.457 | 0.272 | 8.54E-47 | 5 | 0.279414 |
| NUSAP1   | 4.48E-32 | 0.360673 | 0.606 | 0.468 | 1.5E-27  | 5 | 0.473615 |
| ODC1     | 7.6E-120 | 0.291811 | 0.998 | 0.985 | 2.6E-115 | 5 | 0.985857 |
| ORC6     | 3.66E-37 | 0.264216 | 0.669 | 0.537 | 1.23E-32 | 5 | 0.542127 |
| PAK1     | 3.4E-101 | 0.360949 | 0.712 | 0.466 | 1.16E-96 | 5 | 0.475925 |
| PBK      | 4.03E-36 | 0.256164 | 0.486 | 0.324 | 1.35E-31 | 5 | 0.330763 |
| PCBP4    | 3.7E-143 | 0.446511 | 0.778 | 0.472 | 1.2E-138 | 5 | 0.483991 |
| PHC2     | 1.1E-249 | 0.551962 | 0.958 | 0.732 | 3.8E-245 | 5 | 0.741303 |
| PHF6     | 1.93E-62 | 0.26044  | 0.822 | 0.662 | 6.47E-58 | 5 | 0.668171 |
| PHLDA1   | 0        | 1.050085 | 0.944 | 0.607 | 0        | 5 | 0.620092 |
| PHLDB2   | 0        | 0.399006 | 0.43  | 0.029 | 0        | 5 | 0.044597 |
| PIMREG   | 8.41E-39 | 0.375242 | 0.53  | 0.372 | 2.82E-34 | 5 | 0.378451 |
| PIN4     | 2.59E-76 | 0.262157 | 0.883 | 0.754 | 8.69E-72 | 5 | 0.758893 |
| PKM      | 4.91E-62 | 0.294434 | 0.991 | 0.949 | 1.65E-57 | 5 | 0.950428 |
| PLPP5    | 9.51E-80 | 0.286225 | 0.631 | 0.394 | 3.19E-75 | 5 | 0.403006 |
| PLXNA2   | 0        | 0.728462 | 0.726 | 0.159 | 0        | 5 | 0.180839 |
| PRAG1    | 0        | 0.290623 | 0.384 | 0.065 | 0        | 5 | 0.077787 |
| PRDX1    | 1.51E-86 | 0.276328 | 0.997 | 0.974 | 5.07E-82 | 5 | 0.974841 |
| PRPF40A  | 7.43E-87 | 0.273749 | 0.961 | 0.883 | 2.49E-82 | 5 | 0.886038 |
| PSMB2    | 5.96E-79 | 0.250743 | 0.961 | 0.896 | 2E-74    | 5 | 0.898227 |
| PSMD14   | 7.79E-98 | 0.319459 | 0.949 | 0.864 | 2.61E-93 | 5 | 0.867347 |
| PSMG2    | 4.04E-65 | 0.260924 | 0.837 | 0.679 | 1.35E-60 | 5 | 0.685121 |
| PSTPIP1  | 0        | 0.250985 | 0.22  | 0.005 | 0        | 5 | 0.013539 |
| PTMA     | 6.2E-127 | 0.252118 | 1     | 0.999 | 2.1E-122 | 5 | 0.999325 |
| PTTG1    | 4.53E-38 | 0.436855 | 0.692 | 0.551 | 1.52E-33 | 5 | 0.556412 |
| PTX3     | 8.6E-283 | 0.453957 | 0.355 | 0.067 | 2.9E-278 | 5 | 0.07864  |
| RALA     | 3.1E-119 | 0.426882 | 0.846 | 0.66  | 1.1E-114 | 5 | 0.667176 |
| RBM8A    | 3.3E-119 | 0.316512 | 0.977 | 0.906 | 1.1E-114 | 5 | 0.908994 |
| RBP1     | 3.3E-177 | 0.525603 | 0.52  | 0.19  | 1.1E-172 | 5 | 0.202658 |
| RCN2     | 0        | 0.600431 | 0.994 | 0.95  | 0        | 5 | 0.951779 |
| RCOR2    | 0        | 0.754654 | 0.966 | 0.579 | 0        | 5 | 0.59376  |
| RGS16    | 0        | 1.613535 | 0.785 | 0.084 | 0        | 5 | 0.111439 |
| RHOBTB3  | 5.33E-64 | 0.25044  | 0.875 | 0.697 | 1.79E-59 | 5 | 0.70392  |
| RNASEH2B | 8.79E-89 | 0.441266 | 0.753 | 0.565 | 2.95E-84 | 5 | 0.572332 |
| RND2     | 6.75E-86 | 0.274462 | 0.523 | 0.269 | 2.26E-81 | 5 | 0.278775 |
| RNF165   | 6E-99    | 0.319695 | 0.713 | 0.438 | 2.01E-94 | 5 | 0.448349 |
| RNF24    | 6.6E-108 | 0.33247  | 0.773 | 0.496 | 2.2E-103 | 5 | 0.506343 |
| RPAIN    | 7.2E-173 | 0.416623 | 0.98  | 0.885 | 2.4E-168 | 5 | 0.888526 |
| RRM2     | 1.08E-61 | 0.343929 | 0.463 | 0.266 | 3.61E-57 | 5 | 0.273267 |
| RYK      | 1.9E-100 | 0.320723 | 0.714 | 0.462 | 6.25E-96 | 5 | 0.471412 |
| SAP30    | 3.1E-138 | 0.427827 | 0.88  | 0.682 | 1E-133   | 5 | 0.689528 |
| SERPING1 | 7E-163   | 0.374405 | 0.631 | 0.289 | 2.3E-158 | 5 | 0.302015 |
| SETBP1   | 3.96E-86 | 0.267067 | 0.719 | 0.459 | 1.33E-81 | 5 | 0.469386 |
| SFPQ     | 1.04E-93 | 0.315774 | 0.99  | 0.97  | 3.48E-89 | 5 | 0.97047  |



|         |          |          |       |       |          |   |          |
|---------|----------|----------|-------|-------|----------|---|----------|
| SGO1    | 7.87E-46 | 0.262097 | 0.452 | 0.279 | 2.64E-41 | 5 | 0.286095 |
| SINHCAF | 1.3E-182 | 0.451721 | 0.957 | 0.773 | 4.5E-178 | 5 | 0.78064  |
| SKA2    | 1.92E-59 | 0.328827 | 0.89  | 0.825 | 6.45E-55 | 5 | 0.827831 |
| SLC4A7  | 1.29E-88 | 0.288868 | 0.656 | 0.402 | 4.32E-84 | 5 | 0.411855 |
| SLC6A15 | 1.6E-122 | 0.265802 | 0.389 | 0.141 | 5.4E-118 | 5 | 0.15099  |
| SLCO5A1 | 5.4E-276 | 0.590873 | 0.778 | 0.35  | 1.8E-271 | 5 | 0.366831 |
| SMARCA5 | 2.4E-99  | 0.33195  | 0.933 | 0.829 | 8.02E-95 | 5 | 0.833019 |
| SMC3    | 8.35E-38 | 0.250885 | 0.902 | 0.884 | 2.8E-33  | 5 | 0.885043 |
| SMC4    | 2.72E-54 | 0.370014 | 0.732 | 0.559 | 9.13E-50 | 5 | 0.565829 |
| SMCO4   | 3.1E-106 | 0.266583 | 0.454 | 0.199 | 1E-101   | 5 | 0.209197 |
| SNRPE   | 4.8E-115 | 0.279783 | 0.991 | 0.958 | 1.6E-110 | 5 | 0.958957 |
| SOX11   | 0        | 0.788344 | 0.997 | 0.924 | 0        | 5 | 0.926762 |
| SOX4    | 0        | 1.125242 | 0.999 | 0.981 | 0        | 5 | 0.981735 |
| SPC25   | 8.24E-59 | 0.367625 | 0.472 | 0.288 | 2.76E-54 | 5 | 0.29473  |
| SRI     | 2.67E-82 | 0.278568 | 0.971 | 0.893 | 8.96E-78 | 5 | 0.896343 |
| SRRM4   | 3.4E-196 | 0.314846 | 0.54  | 0.168 | 1.2E-191 | 5 | 0.182403 |
| SSTR2   | 2.4E-228 | 0.389325 | 0.731 | 0.239 | 7.9E-224 | 5 | 0.258662 |
| STK17A  | 9.5E-172 | 0.340253 | 0.451 | 0.15  | 3.2E-167 | 5 | 0.162006 |
| STMP1   | 1.49E-87 | 0.284518 | 0.951 | 0.868 | 5.01E-83 | 5 | 0.870971 |
| STXBP6  | 0        | 0.749758 | 0.778 | 0.35  | 0        | 5 | 0.366369 |
| SVIL    | 4E-138   | 0.399335 | 0.743 | 0.444 | 1.3E-133 | 5 | 0.455812 |
| TAGLN3  | 0        | 1.075006 | 0.97  | 0.538 | 0        | 5 | 0.554565 |
| TBPL1   | 2.55E-74 | 0.257077 | 0.684 | 0.46  | 8.55E-70 | 5 | 0.468498 |
| TCF3    | 9.5E-125 | 0.354911 | 0.912 | 0.716 | 3.2E-120 | 5 | 0.723464 |
| TCF4    | 4.63E-67 | 0.251036 | 0.983 | 0.914 | 1.55E-62 | 5 | 0.917132 |
| TCP1    | 3.3E-110 | 0.326117 | 0.962 | 0.897 | 1.1E-105 | 5 | 0.899861 |
| TDG     | 1.8E-85  | 0.294049 | 0.846 | 0.675 | 6.03E-81 | 5 | 0.681532 |
| TFDP2   | 1.6E-238 | 0.611346 | 0.922 | 0.666 | 5.5E-234 | 5 | 0.675882 |
| TMEM158 | 9.7E-252 | 0.776027 | 0.823 | 0.447 | 3.3E-247 | 5 | 0.461853 |
| TMEM237 | 7.6E-100 | 0.318223 | 0.688 | 0.435 | 2.56E-95 | 5 | 0.444867 |
| TMEM91  | 1.5E-168 | 0.362269 | 0.52  | 0.199 | 4.9E-164 | 5 | 0.211613 |
| TMPO    | 8.27E-50 | 0.266061 | 0.921 | 0.821 | 2.77E-45 | 5 | 0.824455 |
| TMSB10  | 3.2E-134 | 0.283841 | 1     | 0.998 | 1.1E-129 | 5 | 0.998472 |
| TMSB4X  | 5.1E-197 | 0.541393 | 1     | 0.999 | 1.7E-192 | 5 | 0.999005 |
| TOP1    | 3.7E-125 | 0.355642 | 0.982 | 0.913 | 1.2E-120 | 5 | 0.915817 |
| TOP2A   | 3.88E-26 | 0.353994 | 0.553 | 0.423 | 1.3E-21  | 5 | 0.427845 |
| TOX3    | 5.2E-269 | 0.548371 | 0.835 | 0.427 | 1.7E-264 | 5 | 0.443374 |
| TP53I11 | 4.4E-139 | 0.469335 | 0.735 | 0.416 | 1.5E-134 | 5 | 0.428556 |
| TPX2    | 4.91E-35 | 0.282023 | 0.503 | 0.34  | 1.65E-30 | 5 | 0.346256 |
| TRAF4   | 2.1E-132 | 0.35117  | 0.672 | 0.356 | 7E-128   | 5 | 0.368573 |
| TSG101  | 2.3E-102 | 0.32971  | 0.845 | 0.645 | 7.84E-98 | 5 | 0.653104 |
| UBALD2  | 9.53E-77 | 0.300128 | 0.641 | 0.401 | 3.2E-72  | 5 | 0.410469 |
| UBE2C   | 9.07E-41 | 0.524002 | 0.54  | 0.37  | 3.04E-36 | 5 | 0.376248 |
| UBE2I   | 2.43E-85 | 0.254368 | 0.988 | 0.955 | 8.14E-81 | 5 | 0.956611 |
| UBE2S   | 2.08E-96 | 0.861603 | 0.932 | 0.855 | 6.99E-92 | 5 | 0.858178 |
| UBE2T   | 3.41E-64 | 0.588384 | 0.723 | 0.645 | 1.14E-59 | 5 | 0.648236 |
| UCP2    | 4.37E-69 | 0.268976 | 0.759 | 0.558 | 1.47E-64 | 5 | 0.565509 |
| VSTM2B  | 0        | 0.455947 | 0.489 | 0.096 | 0        | 5 | 0.111261 |



|           |          |          |       |       |          |   |          |
|-----------|----------|----------|-------|-------|----------|---|----------|
| YWHAZ     | 7.1E-217 | 0.494606 | 0.99  | 0.943 | 2.4E-212 | 5 | 0.944991 |
| ZC3H12C   | 2E-294   | 0.318416 | 0.456 | 0.104 | 6.7E-290 | 5 | 0.117444 |
| ZNF706    | 5E-222   | 0.512042 | 0.991 | 0.937 | 1.7E-217 | 5 | 0.939377 |
| ZWINT     | 1.47E-38 | 0.270713 | 0.57  | 0.425 | 4.94E-34 | 5 | 0.430582 |
| ABCA1     | 1.3E-148 | 0.279681 | 0.381 | 0.04  | 4.4E-144 | 6 | 0.0425   |
| ABHD2     | 2.3E-124 | 0.535945 | 0.695 | 0.16  | 7.8E-120 | 6 | 0.165026 |
| ABRAXAS1  | 7.31E-45 | 0.356828 | 0.623 | 0.252 | 2.45E-40 | 6 | 0.255179 |
| AC097478. | 0        | 0.394532 | 0.347 | 0.01  | 0        | 6 | 0.013077 |
| ACP5      | 0        | 0.270023 | 0.331 | 0     | 0        | 6 | 0.002985 |
| ACTA2     | 3.99E-92 | 0.814586 | 0.268 | 0.031 | 1.34E-87 | 6 | 0.033474 |
| ADAMTS18  | 0        | 0.750064 | 0.728 | 0.023 | 0        | 6 | 0.028997 |
| AKAP13    | 8.2E-20  | 0.260322 | 0.657 | 0.414 | 2.75E-15 | 6 | 0.41619  |
| AL391650. | 0        | 0.624598 | 0.623 | 0.001 | 0        | 6 | 0.006467 |
| ALDH1A1   | 0        | 0.827446 | 0.502 | 0.007 | 0        | 6 | 0.011407 |
| ALDH1A3   | 0        | 0.26192  | 0.268 | 0.001 | 0        | 6 | 0.003376 |
| ALKBH7    | 4.42E-60 | 0.528936 | 0.983 | 0.834 | 1.48E-55 | 6 | 0.835685 |
| ANXA1     | 9.4E-214 | 0.90712  | 0.414 | 0.033 | 3.1E-209 | 6 | 0.036353 |
| ANXA2     | 1.8E-253 | 1.393537 | 0.941 | 0.176 | 6E-249   | 6 | 0.1829   |
| ANXA6     | 4.06E-33 | 0.309999 | 0.741 | 0.388 | 1.36E-28 | 6 | 0.390889 |
| APLP2     | 9.8E-103 | 0.887008 | 0.979 | 0.719 | 3.28E-98 | 6 | 0.721581 |
| APOC1     | 0        | 0.648622 | 0.565 | 0.035 | 0        | 6 | 0.039124 |
| APOE      | 0        | 2.675559 | 0.992 | 0.049 | 0        | 6 | 0.056892 |
| APP       | 5.23E-51 | 0.489168 | 0.954 | 0.709 | 1.76E-46 | 6 | 0.711275 |
| ARHGAP28  | 3.8E-99  | 0.271083 | 0.439 | 0.074 | 1.29E-94 | 6 | 0.077289 |
| ARL4A     | 2.1E-289 | 2.236665 | 0.996 | 0.213 | 7E-285   | 6 | 0.219466 |
| ARL6IP5   | 5.26E-21 | 0.25955  | 0.95  | 0.756 | 1.76E-16 | 6 | 0.758111 |
| ASAH1     | 1.1E-108 | 0.972551 | 0.929 | 0.536 | 3.7E-104 | 6 | 0.538858 |
| ASB13     | 1.45E-56 | 0.283789 | 0.49  | 0.138 | 4.86E-52 | 6 | 0.141146 |
| ATOX1     | 1.02E-21 | 0.256646 | 0.958 | 0.858 | 3.42E-17 | 6 | 0.858569 |
| ATP1B1    | 9.35E-96 | 1.028202 | 0.9   | 0.447 | 3.14E-91 | 6 | 0.450979 |
| ATP6V0E1  | 2.75E-24 | 0.27111  | 0.908 | 0.752 | 9.21E-20 | 6 | 0.753314 |
| ATP6V1C2  | 0        | 1.42731  | 0.895 | 0.003 | 0        | 6 | 0.010376 |
| ATRAID    | 7.06E-17 | 0.261852 | 0.916 | 0.728 | 2.37E-12 | 6 | 0.729825 |
| B2M       | 9.9E-133 | 1.580997 | 0.967 | 0.567 | 3.3E-128 | 6 | 0.570555 |
| BACE2     | 2.9E-145 | 0.596318 | 0.699 | 0.146 | 9.6E-141 | 6 | 0.151061 |
| BCAM      | 1.77E-37 | 0.316759 | 0.598 | 0.256 | 5.94E-33 | 6 | 0.258449 |
| BDH2      | 7.92E-36 | 0.321198 | 0.724 | 0.373 | 2.65E-31 | 6 | 0.376426 |
| BHLHE41   | 0        | 0.258282 | 0.293 | 0.005 | 0        | 6 | 0.007249 |
| BLVRB     | 1.6E-112 | 0.714356 | 0.904 | 0.357 | 5.4E-108 | 6 | 0.361643 |
| BMP4      | 0        | 0.807925 | 0.674 | 0.014 | 0        | 6 | 0.019687 |
| BMP7      | 9.75E-63 | 0.443548 | 0.803 | 0.336 | 3.27E-58 | 6 | 0.339967 |
| BRI3      | 1.64E-40 | 0.381724 | 0.979 | 0.933 | 5.49E-36 | 6 | 0.933727 |
| BSG       | 3.27E-58 | 0.511656 | 0.987 | 0.923 | 1.1E-53  | 6 | 0.923812 |
| BTG1      | 2.9E-134 | 1.624755 | 0.992 | 0.852 | 9.8E-130 | 6 | 0.85299  |
| C16orf74  | 1.1E-209 | 0.26578  | 0.397 | 0.031 | 3.6E-205 | 6 | 0.034576 |
| C6orf48   | 8.54E-33 | 0.311014 | 0.774 | 0.433 | 2.86E-28 | 6 | 0.435699 |
| C9orf3    | 1.15E-73 | 0.297624 | 0.444 | 0.096 | 3.85E-69 | 6 | 0.098611 |
| CA14      | 0        | 0.578385 | 0.665 | 0.034 | 0        | 6 | 0.039018 |

|         |          |          |       |       |          |   |          |
|---------|----------|----------|-------|-------|----------|---|----------|
| CALD1   | 8.55E-79 | 0.794243 | 0.983 | 0.793 | 2.87E-74 | 6 | 0.794712 |
| CALR    | 1.02E-23 | 0.362261 | 0.958 | 0.894 | 3.41E-19 | 6 | 0.894496 |
| CALU    | 2.82E-36 | 0.415249 | 0.925 | 0.722 | 9.47E-32 | 6 | 0.723855 |
| CANX    | 2.93E-51 | 0.552627 | 0.95  | 0.788 | 9.83E-47 | 6 | 0.789844 |
| CAST    | 1E-107   | 0.480492 | 0.686 | 0.169 | 3.5E-103 | 6 | 0.173164 |
| CCBE1   | 0        | 0.461808 | 0.439 | 0.005 | 0        | 6 | 0.008848 |
| CCDC33  | 3.2E-201 | 0.258645 | 0.402 | 0.034 | 1.1E-196 | 6 | 0.036637 |
| CCDC51  | 1.2E-107 | 0.651116 | 0.791 | 0.255 | 3.9E-103 | 6 | 0.259479 |
| CCDC80  | 7.5E-164 | 0.252422 | 0.385 | 0.037 | 2.5E-159 | 6 | 0.0398   |
| CCND1   | 1.68E-37 | 0.45894  | 0.929 | 0.616 | 5.65E-33 | 6 | 0.618422 |
| CD164   | 1.72E-59 | 0.476167 | 0.745 | 0.334 | 5.78E-55 | 6 | 0.337088 |
| CD59    | 1.37E-33 | 0.338049 | 0.816 | 0.477 | 4.6E-29  | 6 | 0.480011 |
| CD63    | 9.6E-119 | 0.942718 | 1     | 0.953 | 3.2E-114 | 6 | 0.953875 |
| CD81    | 9.89E-35 | 0.330853 | 0.983 | 0.956 | 3.32E-30 | 6 | 0.956469 |
| CDH6    | 5.5E-305 | 0.538254 | 0.527 | 0.039 | 1.8E-300 | 6 | 0.042749 |
| CDH7    | 1.95E-57 | 0.266923 | 0.381 | 0.085 | 6.53E-53 | 6 | 0.087772 |
| CDKN1C  | 3.96E-93 | 0.57639  | 0.795 | 0.24  | 1.33E-88 | 6 | 0.244448 |
| CDO1    | 7.03E-69 | 0.585643 | 0.812 | 0.341 | 2.36E-64 | 6 | 0.344515 |
| CEBPB   | 5.2E-128 | 0.315809 | 0.456 | 0.064 | 1.8E-123 | 6 | 0.067304 |
| CERS2   | 1.65E-54 | 0.287989 | 0.603 | 0.205 | 5.54E-50 | 6 | 0.208735 |
| CFI     | 5.6E-138 | 0.423459 | 0.569 | 0.094 | 1.9E-133 | 6 | 0.097971 |
| CHCHD10 | 4.68E-54 | 0.508798 | 0.711 | 0.316 | 1.57E-49 | 6 | 0.31964  |
| CHID1   | 2.39E-20 | 0.271087 | 0.841 | 0.611 | 8.03E-16 | 6 | 0.613091 |
| CHMP2B  | 1.32E-26 | 0.309282 | 0.707 | 0.394 | 4.44E-22 | 6 | 0.396255 |
| CHRNA3  | 1.9E-177 | 0.36517  | 0.393 | 0.036 | 6.5E-173 | 6 | 0.039018 |
| CIRBP   | 2.5E-23  | 0.266679 | 1     | 0.989 | 8.38E-19 | 6 | 0.988913 |
| CISD1   | 3.3E-15  | 0.27741  | 0.9   | 0.735 | 1.11E-10 | 6 | 0.736434 |
| CITED4  | 2.41E-30 | 0.260558 | 0.477 | 0.193 | 8.08E-26 | 6 | 0.195658 |
| CKAP4   | 1.56E-48 | 0.430676 | 0.812 | 0.457 | 5.24E-44 | 6 | 0.459721 |
| CLCN3   | 7.6E-34  | 0.386181 | 0.745 | 0.419 | 2.55E-29 | 6 | 0.421485 |
| CLTA    | 1.24E-29 | 0.289364 | 0.996 | 0.962 | 4.15E-25 | 6 | 0.96251  |
| CLU     | 2.61E-93 | 0.959567 | 0.979 | 0.643 | 8.74E-89 | 6 | 0.645748 |
| CMTM6   | 1.75E-32 | 0.303762 | 0.757 | 0.415 | 5.88E-28 | 6 | 0.41818  |
| CNN2    | 1.53E-34 | 0.304546 | 0.703 | 0.349 | 5.13E-30 | 6 | 0.352297 |
| CNPY2   | 2.59E-26 | 0.300053 | 0.925 | 0.795 | 8.68E-22 | 6 | 0.795956 |
| CNPY4   | 4.61E-51 | 0.306658 | 0.603 | 0.213 | 1.55E-46 | 6 | 0.216161 |
| COBLL1  | 0        | 1.162967 | 0.858 | 0.036 | 0        | 6 | 0.043282 |
| COL18A1 | 3E-155   | 0.886307 | 0.904 | 0.275 | 1E-150   | 6 | 0.279983 |
| COL1A2  | 1.96E-15 | 0.260852 | 0.13  | 0.034 | 6.57E-11 | 6 | 0.035251 |
| COL3A1  | 1.75E-66 | 0.447784 | 0.159 | 0.016 | 5.88E-62 | 6 | 0.016844 |
| COL4A1  | 4.39E-39 | 0.260624 | 0.448 | 0.152 | 1.47E-34 | 6 | 0.154046 |
| COL4A2  | 5.22E-24 | 0.324657 | 0.703 | 0.426 | 1.75E-19 | 6 | 0.428059 |
| COL6A1  | 1.43E-34 | 0.363788 | 0.732 | 0.39  | 4.81E-30 | 6 | 0.392666 |
| COL8A2  | 0        | 0.288255 | 0.326 | 0.002 | 0        | 6 | 0.004513 |
| COL9A2  | 1.66E-78 | 0.332869 | 0.469 | 0.1   | 5.58E-74 | 6 | 0.103301 |
| COLEC12 | 0        | 0.840134 | 0.757 | 0.03  | 0        | 6 | 0.036282 |
| COMMD6  | 2.5E-29  | 0.275908 | 0.992 | 0.974 | 8.38E-25 | 6 | 0.974201 |
| COTL1   | 1.04E-30 | 0.41127  | 0.824 | 0.526 | 3.49E-26 | 6 | 0.528482 |

|         |          |          |       |       |          |   |          |
|---------|----------|----------|-------|-------|----------|---|----------|
| COX7A2L | 1.79E-35 | 0.334058 | 0.996 | 0.926 | 6.01E-31 | 6 | 0.926726 |
| CPLX3   | 0        | 0.504048 | 0.51  | 0.001 | 0        | 6 | 0.005686 |
| CPVL    | 3.1E-130 | 0.256244 | 0.318 | 0.032 | 1E-125   | 6 | 0.034149 |
| CPXM1   | 7.15E-38 | 0.256331 | 0.536 | 0.201 | 2.4E-33  | 6 | 0.203582 |
| CRABP1  | 5.2E-135 | 0.4899   | 0.669 | 0.121 | 1.8E-130 | 6 | 0.125262 |
| CRABP2  | 3.43E-59 | 0.40327  | 0.54  | 0.16  | 1.15E-54 | 6 | 0.163391 |
| CRIM1   | 4.07E-54 | 0.328493 | 0.515 | 0.154 | 1.37E-49 | 6 | 0.157493 |
| CRNDE   | 1.1E-54  | 0.470415 | 0.69  | 0.269 | 3.69E-50 | 6 | 0.272378 |
| CRTAP   | 6.6E-102 | 0.602175 | 0.849 | 0.31  | 2.21E-97 | 6 | 0.314275 |
| CRYAB   | 0        | 1.129168 | 0.699 | 0.013 | 0        | 6 | 0.018549 |
| CST3    | 2.33E-55 | 0.653456 | 0.971 | 0.804 | 7.82E-51 | 6 | 0.805622 |
| CSTB    | 2.42E-43 | 0.423425 | 0.992 | 0.91  | 8.11E-39 | 6 | 0.910486 |
| CTNNA1  | 5.78E-23 | 0.267388 | 0.795 | 0.509 | 1.94E-18 | 6 | 0.510998 |
| CTSB    | 4.99E-41 | 0.296619 | 0.695 | 0.31  | 1.67E-36 | 6 | 0.312818 |
| CTSC    | 6.2E-121 | 1.133777 | 0.937 | 0.446 | 2.1E-116 | 6 | 0.449842 |
| CTSD    | 8.29E-90 | 0.669494 | 0.925 | 0.499 | 2.78E-85 | 6 | 0.502363 |
| CTSH    | 0        | 1.161502 | 0.887 | 0.071 | 0        | 6 | 0.077965 |
| CTSL    | 1.2E-53  | 0.379562 | 0.657 | 0.25  | 4.02E-49 | 6 | 0.253936 |
| CTSV    | 6.86E-41 | 0.521083 | 0.485 | 0.183 | 2.3E-36  | 6 | 0.185708 |
| CUTA    | 1.49E-19 | 0.264302 | 0.992 | 0.928 | 4.98E-15 | 6 | 0.928645 |
| CXCL12  | 0        | 0.375666 | 0.423 | 0.024 | 0        | 6 | 0.027042 |
| CXCL14  | 1.6E-245 | 0.550735 | 0.54  | 0.05  | 5.5E-241 | 6 | 0.054262 |
| CXXC5   | 1.12E-29 | 0.295614 | 0.904 | 0.631 | 3.77E-25 | 6 | 0.633275 |
| CYP1B1  | 3.6E-226 | 0.413954 | 0.318 | 0.018 | 1.2E-221 | 6 | 0.02093  |
| CYSTM1  | 7.43E-48 | 0.332447 | 0.787 | 0.354 | 2.49E-43 | 6 | 0.357343 |
| DAB2    | 3.3E-290 | 0.258493 | 0.389 | 0.022 | 1.1E-285 | 6 | 0.024768 |
| DAPL1   | 0        | 0.833384 | 0.607 | 0.017 | 0        | 6 | 0.021961 |
| DCBLD2  | 1.46E-28 | 0.345651 | 0.72  | 0.413 | 4.91E-24 | 6 | 0.415692 |
| DCT     | 0        | 3.429117 | 0.987 | 0.031 | 0        | 6 | 0.038662 |
| DDOST   | 2.75E-31 | 0.366126 | 0.908 | 0.703 | 9.21E-27 | 6 | 0.704382 |
| DDR2    | 0        | 0.374549 | 0.448 | 0.027 | 0        | 6 | 0.030774 |
| DESI2   | 6.11E-24 | 0.26011  | 0.757 | 0.449 | 2.05E-19 | 6 | 0.451654 |
| DIO3    | 0        | 0.694966 | 0.423 | 0.003 | 0        | 6 | 0.006965 |
| DIO3OS  | 0        | 0.508757 | 0.54  | 0.003 | 0        | 6 | 0.007533 |
| DNAJC1  | 6.81E-56 | 0.507472 | 0.841 | 0.483 | 2.28E-51 | 6 | 0.485661 |
| DNAJC15 | 5.35E-67 | 0.269753 | 0.439 | 0.098 | 1.79E-62 | 6 | 0.100494 |
| DNAJC3  | 1.76E-64 | 0.34848  | 0.623 | 0.196 | 5.9E-60  | 6 | 0.199389 |
| DPP7    | 1.52E-82 | 0.589242 | 0.778 | 0.286 | 5.11E-78 | 6 | 0.289933 |
| DRD4    | 0        | 0.619498 | 0.598 | 0.034 | 0        | 6 | 0.038876 |
| DSC2    | 0        | 0.564875 | 0.649 | 0.034 | 0        | 6 | 0.03948  |
| DSEL    | 1.34E-82 | 0.307269 | 0.423 | 0.08  | 4.51E-78 | 6 | 0.082762 |
| DSG2    | 8.2E-59  | 0.250583 | 0.477 | 0.13  | 2.75E-54 | 6 | 0.132973 |
| DSP     | 0        | 0.519859 | 0.586 | 0.018 | 0        | 6 | 0.022423 |
| DTNA    | 1.1E-197 | 0.546258 | 0.682 | 0.099 | 3.6E-193 | 6 | 0.104296 |
| DTNBP1  | 2.71E-27 | 0.381497 | 0.649 | 0.365 | 9.09E-23 | 6 | 0.367258 |
| EEF1A1  | 1.25E-51 | 0.278067 | 1     | 1     | 4.18E-47 | 6 | 0.999716 |
| EFEMP2  | 7.9E-138 | 0.432033 | 0.623 | 0.115 | 2.7E-133 | 6 | 0.119434 |
| EFNA5   | 2.3E-185 | 0.902486 | 0.799 | 0.16  | 7.6E-181 | 6 | 0.165168 |

|           |          |          |       |       |          |   |          |
|-----------|----------|----------|-------|-------|----------|---|----------|
| EIF2S3    | 1.43E-22 | 0.294867 | 0.862 | 0.679 | 4.81E-18 | 6 | 0.680324 |
| EIF3F     | 3.18E-28 | 0.289187 | 0.987 | 0.941 | 1.07E-23 | 6 | 0.941864 |
| EIF4A2    | 5.7E-53  | 0.485419 | 0.992 | 0.888 | 1.91E-48 | 6 | 0.88849  |
| ELN       | 7E-203   | 0.616463 | 0.586 | 0.074 | 2.4E-198 | 6 | 0.078711 |
| ELP4      | 8.03E-52 | 0.457341 | 0.703 | 0.317 | 2.69E-47 | 6 | 0.320529 |
| EMP2      | 1.07E-25 | 0.299887 | 0.736 | 0.431 | 3.6E-21  | 6 | 0.433318 |
| EPB41L4A- | 1.47E-28 | 0.341297 | 0.833 | 0.562 | 4.94E-24 | 6 | 0.563839 |
| ERGIC3    | 4.73E-23 | 0.257266 | 0.858 | 0.617 | 1.59E-18 | 6 | 0.619488 |
| ERICH5    | 1.4E-241 | 0.28517  | 0.234 | 0.009 | 4.7E-237 | 6 | 0.011087 |
| ERP29     | 4.92E-70 | 0.561346 | 0.983 | 0.887 | 1.65E-65 | 6 | 0.887602 |
| EVA1B     | 3.9E-126 | 0.300073 | 0.49  | 0.074 | 1.3E-121 | 6 | 0.077929 |
| FABP3     | 0        | 0.329749 | 0.444 | 0.026 | 0        | 6 | 0.02985  |
| FAM129A   | 0        | 0.305666 | 0.418 | 0.008 | 0        | 6 | 0.011798 |
| FAM213A   | 4.32E-27 | 0.332858 | 0.962 | 0.774 | 1.45E-22 | 6 | 0.775736 |
| FAM84B    | 1E-214   | 0.349659 | 0.477 | 0.045 | 3.4E-210 | 6 | 0.048186 |
| FBN1      | 0        | 0.574887 | 0.703 | 0.043 | 0        | 6 | 0.048932 |
| FBN2      | 6.3E-156 | 0.592216 | 0.686 | 0.131 | 2.1E-151 | 6 | 0.135496 |
| FBXO32    | 0        | 0.473485 | 0.527 | 0.025 | 0        | 6 | 0.029246 |
| FCGRT     | 2.5E-139 | 0.297348 | 0.423 | 0.052 | 8.5E-135 | 6 | 0.055364 |
| FGFR1     | 4.45E-64 | 0.626134 | 0.87  | 0.505 | 1.49E-59 | 6 | 0.507978 |
| FILIP1    | 4.22E-49 | 0.4734   | 0.669 | 0.283 | 1.41E-44 | 6 | 0.286628 |
| FKBP10    | 2.87E-39 | 0.356028 | 0.757 | 0.4   | 9.63E-35 | 6 | 0.403397 |
| FKBP7     | 4.26E-70 | 0.279776 | 0.523 | 0.132 | 1.43E-65 | 6 | 0.134963 |
| FLNA      | 9.97E-23 | 0.268168 | 0.795 | 0.503 | 3.34E-18 | 6 | 0.505526 |
| FNIP2     | 7.37E-67 | 0.417752 | 0.628 | 0.201 | 2.47E-62 | 6 | 0.204577 |
| FOXP1     | 1.27E-19 | 0.251595 | 0.778 | 0.512 | 4.27E-15 | 6 | 0.514374 |
| FRZB      | 0        | 1.537262 | 0.854 | 0.018 | 0        | 6 | 0.025017 |
| FST       | 2.06E-97 | 0.41075  | 0.322 | 0.042 | 6.92E-93 | 6 | 0.04417  |
| FSTL1     | 1.9E-124 | 0.687844 | 0.828 | 0.245 | 6.4E-120 | 6 | 0.2496   |
| FTH1      | 1.87E-69 | 0.597251 | 1     | 0.997 | 6.26E-65 | 6 | 0.997299 |
| FTL       | 2.5E-102 | 0.670103 | 1     | 0.995 | 8.34E-98 | 6 | 0.994883 |
| FUCA2     | 1.6E-161 | 0.539917 | 0.724 | 0.136 | 5.4E-157 | 6 | 0.14136  |
| GABRG3    | 2.42E-89 | 0.549035 | 0.72  | 0.218 | 8.11E-85 | 6 | 0.221989 |
| GALNT18   | 1.5E-214 | 0.448477 | 0.598 | 0.07  | 5.1E-210 | 6 | 0.07498  |
| GCHFR     | 2.06E-40 | 0.350943 | 0.644 | 0.288 | 6.92E-36 | 6 | 0.291496 |
| GDE1      | 3.46E-21 | 0.264355 | 0.808 | 0.553 | 1.16E-16 | 6 | 0.554813 |
| GINM1     | 2.04E-21 | 0.260856 | 0.803 | 0.522 | 6.84E-17 | 6 | 0.524608 |
| GIPC1     | 2.37E-25 | 0.313304 | 0.833 | 0.578 | 7.93E-21 | 6 | 0.57983  |
| GJA1      | 0        | 2.36944  | 0.992 | 0.085 | 0        | 6 | 0.093032 |
| GLIPR2    | 1.4E-68  | 0.423027 | 0.707 | 0.246 | 4.71E-64 | 6 | 0.249849 |
| GNB3      | 2E-224   | 0.56794  | 0.586 | 0.067 | 6.7E-220 | 6 | 0.071355 |
| GNG11     | 3.37E-12 | 0.284602 | 0.255 | 0.12  | 1.13E-07 | 6 | 0.121602 |
| GNPDA1    | 1.6E-47  | 0.433227 | 0.883 | 0.509 | 5.36E-43 | 6 | 0.512597 |
| GOLGA4    | 4.73E-44 | 0.549541 | 0.891 | 0.604 | 1.59E-39 | 6 | 0.606801 |
| GOLGB1    | 6.05E-11 | 0.272118 | 0.753 | 0.583 | 2.03E-06 | 6 | 0.584521 |
| GPNMB     | 0        | 1.026304 | 0.736 | 0.005 | 0        | 6 | 0.010838 |
| GPR143    | 0        | 0.65069  | 0.632 | 0.012 | 0        | 6 | 0.017697 |
| GPR180    | 5.7E-202 | 0.63737  | 0.72  | 0.114 | 1.9E-197 | 6 | 0.119363 |

|          |          |          |       |       |          |   |          |
|----------|----------|----------|-------|-------|----------|---|----------|
| GPRC5C   | 2.3E-58  | 0.257876 | 0.573 | 0.171 | 7.71E-54 | 6 | 0.174372 |
| GPX8     | 1.28E-81 | 0.35396  | 0.649 | 0.18  | 4.29E-77 | 6 | 0.184073 |
| GRASP    | 2E-281   | 0.296108 | 0.464 | 0.032 | 6.6E-277 | 6 | 0.035571 |
| GRID2    | 9.6E-264 | 1.222245 | 0.858 | 0.14  | 3.2E-259 | 6 | 0.146335 |
| GRN      | 3.16E-71 | 0.536785 | 0.799 | 0.343 | 1.06E-66 | 6 | 0.347358 |
| GSTK1    | 3.91E-55 | 0.328672 | 0.611 | 0.21  | 1.31E-50 | 6 | 0.213319 |
| GSTO1    | 3.36E-43 | 0.332187 | 0.812 | 0.38  | 1.13E-38 | 6 | 0.383959 |
| GSTP1    | 3.6E-119 | 0.86478  | 1     | 0.986 | 1.2E-114 | 6 | 0.985964 |
| HACD1    | 2.23E-86 | 0.342957 | 0.561 | 0.133 | 7.47E-82 | 6 | 0.136242 |
| HADHB    | 4.98E-24 | 0.296532 | 0.845 | 0.573 | 1.67E-19 | 6 | 0.575673 |
| HEXA     | 1.01E-28 | 0.271434 | 0.69  | 0.355 | 3.4E-24  | 6 | 0.358303 |
| HIBCH    | 1.61E-32 | 0.324392 | 0.845 | 0.507 | 5.39E-28 | 6 | 0.510039 |
| HIGD2A   | 8.21E-29 | 0.316247 | 0.937 | 0.791 | 2.75E-24 | 6 | 0.79258  |
| HIST3H2A | 6.49E-16 | 0.262065 | 0.774 | 0.571 | 2.18E-11 | 6 | 0.572261 |
| HLA-A    | 2.26E-55 | 0.7474   | 0.854 | 0.516 | 7.58E-51 | 6 | 0.518638 |
| HLA-B    | 7.6E-53  | 0.407718 | 0.406 | 0.108 | 2.55E-48 | 6 | 0.11016  |
| HLA-C    | 4.12E-39 | 0.477056 | 0.644 | 0.307 | 1.38E-34 | 6 | 0.31001  |
| HLA-E    | 1.21E-51 | 0.256427 | 0.519 | 0.159 | 4.07E-47 | 6 | 0.162325 |
| HOMER3   | 3.14E-24 | 0.268124 | 0.849 | 0.584 | 1.05E-19 | 6 | 0.586191 |
| HSBP1L1  | 0        | 0.36914  | 0.473 | 0.031 | 0        | 6 | 0.03454  |
| HSD17B14 | 0        | 0.590243 | 0.686 | 0.046 | 0        | 6 | 0.051349 |
| HSD17B2  | 0        | 2.230968 | 0.992 | 0.005 | 0        | 6 | 0.013184 |
| HSP90B1  | 9.08E-30 | 0.483682 | 0.975 | 0.863 | 3.05E-25 | 6 | 0.863473 |
| HSPA1A   | 1.15E-35 | 0.250315 | 0.498 | 0.18  | 3.86E-31 | 6 | 0.183114 |
| HSPA5    | 1.14E-29 | 0.451581 | 0.925 | 0.765 | 3.81E-25 | 6 | 0.766639 |
| HSPB1    | 5.79E-41 | 0.435803 | 0.912 | 0.612 | 1.94E-36 | 6 | 0.614584 |
| HTRA1    | 2.2E-137 | 0.520665 | 0.728 | 0.154 | 7.3E-133 | 6 | 0.15863  |
| HUNK     | 7.07E-49 | 0.286389 | 0.502 | 0.157 | 2.37E-44 | 6 | 0.159625 |
| IFITM3   | 3.19E-80 | 0.363944 | 0.849 | 0.339 | 1.07E-75 | 6 | 0.343556 |
| IGFBP4   | 3.8E-27  | 0.2629   | 0.519 | 0.235 | 1.27E-22 | 6 | 0.237731 |
| IGFBP5   | 4.7E-125 | 1.505531 | 0.925 | 0.41  | 1.6E-120 | 6 | 0.414804 |
| IGFBP7   | 0        | 2.779494 | 0.979 | 0.049 | 0        | 6 | 0.057176 |
| INPP1    | 0        | 0.399027 | 0.548 | 0.039 | 0        | 6 | 0.043602 |
| ITGAV    | 9.95E-91 | 0.383061 | 0.502 | 0.107 | 3.34E-86 | 6 | 0.110088 |
| ITGB1    | 5.29E-36 | 0.38057  | 0.887 | 0.647 | 1.77E-31 | 6 | 0.648911 |
| ITM2B    | 4.1E-133 | 1.709727 | 0.992 | 0.881 | 1.4E-128 | 6 | 0.882271 |
| ITM2C    | 1.31E-58 | 0.516386 | 0.874 | 0.497 | 4.38E-54 | 6 | 0.500551 |
| ITPKB    | 3.7E-173 | 0.300493 | 0.494 | 0.058 | 1.2E-168 | 6 | 0.062151 |
| KCNIP4   | 0        | 0.470923 | 0.498 | 0.019 | 0        | 6 | 0.023134 |
| KCNMB4   | 3.31E-26 | 0.254099 | 0.607 | 0.298 | 1.11E-21 | 6 | 0.300416 |
| KCNQ1OT1 | 9.06E-77 | 1.022016 | 0.904 | 0.465 | 3.04E-72 | 6 | 0.468356 |
| KDELR1   | 1.38E-68 | 0.530609 | 0.996 | 0.883 | 4.62E-64 | 6 | 0.884332 |
| KIF21A   | 5.41E-21 | 0.341918 | 0.95  | 0.829 | 1.81E-16 | 6 | 0.830425 |
| KLHDC8B  | 1.93E-38 | 0.346876 | 0.644 | 0.283 | 6.49E-34 | 6 | 0.286521 |
| KREMEN1  | 3.4E-104 | 0.250787 | 0.418 | 0.065 | 1.2E-99  | 6 | 0.06773  |
| KRT17    | 8.6E-109 | 0.563801 | 0.188 | 0.013 | 2.9E-104 | 6 | 0.01496  |
| KRT18    | 3.6E-301 | 1.728719 | 0.87  | 0.124 | 1.2E-296 | 6 | 0.130308 |
| KRT19    | 0        | 0.771188 | 0.485 | 0.016 | 0        | 6 | 0.019616 |



|           |          |          |       |       |          |   |          |
|-----------|----------|----------|-------|-------|----------|---|----------|
| KRT8      | 0        | 1.710572 | 0.954 | 0.052 | 0        | 6 | 0.060019 |
| LAMA5     | 6.39E-64 | 0.253313 | 0.448 | 0.106 | 2.14E-59 | 6 | 0.109022 |
| LAMB2     | 1.5E-209 | 0.577979 | 0.715 | 0.109 | 5.1E-205 | 6 | 0.114388 |
| LAMP2     | 3.33E-79 | 0.443863 | 0.715 | 0.235 | 1.12E-74 | 6 | 0.238869 |
| LAPTM4A   | 3.6E-87  | 0.624013 | 0.987 | 0.832 | 1.21E-82 | 6 | 0.832948 |
| LDHA      | 1.17E-21 | 0.263306 | 0.946 | 0.704 | 3.94E-17 | 6 | 0.706087 |
| LEPROT    | 6.53E-74 | 0.502919 | 0.841 | 0.354 | 2.19E-69 | 6 | 0.358232 |
| LETMD1    | 4.08E-36 | 0.273363 | 0.632 | 0.273 | 1.37E-31 | 6 | 0.276465 |
| LGMN      | 3.23E-73 | 0.488736 | 0.732 | 0.281 | 1.08E-68 | 6 | 0.284567 |
| LHFPL6    | 6.38E-97 | 0.465193 | 0.661 | 0.156 | 2.14E-92 | 6 | 0.15998  |
| LINC01933 | 0        | 0.548    | 0.46  | 0.002 | 0        | 6 | 0.005863 |
| LITAF     | 1.62E-43 | 0.289669 | 0.523 | 0.183 | 5.43E-39 | 6 | 0.185601 |
| LMAN1     | 2.66E-54 | 0.421905 | 0.812 | 0.385 | 8.91E-50 | 6 | 0.388792 |
| LOXL1     | 6.4E-126 | 0.55041  | 0.757 | 0.19  | 2.2E-121 | 6 | 0.194414 |
| LPP       | 2.11E-65 | 0.299928 | 0.506 | 0.131 | 7.09E-61 | 6 | 0.133862 |
| LRP10     | 4.88E-61 | 0.276558 | 0.473 | 0.123 | 1.64E-56 | 6 | 0.126328 |
| LSR       | 3E-205   | 0.282944 | 0.435 | 0.038 | 1E-200   | 6 | 0.041754 |
| MAB21L2   | 0        | 0.534664 | 0.586 | 0.007 | 0        | 6 | 0.011549 |
| MAF       | 2.6E-115 | 0.272163 | 0.477 | 0.074 | 8.8E-111 | 6 | 0.077254 |
| MAN1A1    | 0        | 0.54624  | 0.623 | 0.017 | 0        | 6 | 0.022494 |
| MDK       | 5.2E-150 | 2.012139 | 1     | 0.76  | 1.8E-145 | 6 | 0.761984 |
| MEST      | 2.77E-46 | 0.264283 | 0.707 | 0.28  | 9.28E-42 | 6 | 0.283359 |
| METRNL    | 1.77E-48 | 0.351687 | 0.628 | 0.239 | 5.94E-44 | 6 | 0.241996 |
| MFAP2     | 5.03E-32 | 0.299404 | 0.749 | 0.388 | 1.69E-27 | 6 | 0.391173 |
| MFGE8     | 2.5E-125 | 0.818368 | 0.854 | 0.294 | 8.3E-121 | 6 | 0.299065 |
| MGST1     | 2.29E-62 | 0.315436 | 0.527 | 0.141 | 7.67E-58 | 6 | 0.144025 |
| MITF      | 0        | 1.405309 | 0.971 | 0.03  | 0        | 6 | 0.038165 |
| MLEC      | 7.68E-37 | 0.396481 | 0.916 | 0.652 | 2.58E-32 | 6 | 0.654241 |
| MSI2      | 2.39E-25 | 0.309756 | 0.757 | 0.48  | 8.02E-21 | 6 | 0.482321 |
| MT-CO1    | 6.59E-83 | 0.454204 | 1     | 0.995 | 2.21E-78 | 6 | 0.994705 |
| MT-CO2    | 8.71E-45 | 0.269359 | 1     | 0.995 | 2.92E-40 | 6 | 0.994776 |
| MT-ND4    | 3.36E-35 | 0.27743  | 0.996 | 0.991 | 1.13E-30 | 6 | 0.990903 |
| MXRA7     | 2.23E-57 | 0.358236 | 0.657 | 0.233 | 7.47E-53 | 6 | 0.236843 |
| MYH9      | 9.95E-49 | 0.305019 | 0.49  | 0.153 | 3.34E-44 | 6 | 0.155432 |
| MYL12A    | 2.44E-39 | 0.404953 | 0.891 | 0.548 | 8.17E-35 | 6 | 0.551295 |
| MYL9      | 0        | 0.775335 | 0.678 | 0.027 | 0        | 6 | 0.032124 |
| MYRF      | 0        | 0.390553 | 0.477 | 0.011 | 0        | 6 | 0.015422 |
| NANOS1    | 1E-122   | 0.55897  | 0.64  | 0.136 | 3.5E-118 | 6 | 0.139832 |
| NBEA      | 3.62E-67 | 0.505392 | 0.816 | 0.319 | 1.21E-62 | 6 | 0.322839 |
| NCCRP1    | 0        | 0.955329 | 0.686 | 0.004 | 0        | 6 | 0.009488 |
| NEAT1     | 4.5E-250 | 2.016587 | 0.967 | 0.22  | 1.5E-245 | 6 | 0.226182 |
| NECAB2    | 4.7E-147 | 0.461009 | 0.481 | 0.065 | 1.6E-142 | 6 | 0.068192 |
| NECTIN2   | 5.14E-39 | 0.349251 | 0.736 | 0.378 | 1.72E-34 | 6 | 0.380583 |
| NELL2     | 2.15E-46 | 0.409814 | 0.833 | 0.401 | 7.22E-42 | 6 | 0.404996 |
| NENF      | 9.85E-14 | 0.27821  | 0.833 | 0.649 | 3.3E-09  | 6 | 0.650297 |
| NET1      | 1.1E-244 | 1.044136 | 0.849 | 0.151 | 3.6E-240 | 6 | 0.157031 |
| NEU1      | 7.85E-48 | 0.322352 | 0.628 | 0.243 | 2.63E-43 | 6 | 0.246686 |
| NEXN      | 1.8E-99  | 0.277861 | 0.368 | 0.053 | 6.02E-95 | 6 | 0.055826 |



|          |          |          |       |       |          |   |          |
|----------|----------|----------|-------|-------|----------|---|----------|
| NKAIN4   | 2.05E-89 | 0.814796 | 0.921 | 0.523 | 6.86E-85 | 6 | 0.526598 |
| NPC2     | 1.6E-143 | 1.16599  | 0.992 | 0.59  | 5.3E-139 | 6 | 0.593049 |
| NPW      | 1.2E-302 | 0.539776 | 0.477 | 0.033 | 4E-298   | 6 | 0.036282 |
| NR2F1    | 6.89E-15 | 0.272893 | 0.908 | 0.758 | 2.31E-10 | 6 | 0.75907  |
| NRIP1    | 9.63E-19 | 0.301942 | 0.59  | 0.348 | 3.23E-14 | 6 | 0.350485 |
| NUCB1    | 2.5E-22  | 0.261908 | 0.728 | 0.445 | 8.37E-18 | 6 | 0.447532 |
| NUDT14   | 1.41E-44 | 0.339019 | 0.766 | 0.356 | 4.72E-40 | 6 | 0.359724 |
| NUDT4    | 4.69E-33 | 0.349576 | 0.615 | 0.288 | 1.57E-28 | 6 | 0.290644 |
| OCA2     | 2.1E-238 | 0.253746 | 0.414 | 0.03  | 7.1E-234 | 6 | 0.033119 |
| OSBPL1A  | 1.2E-175 | 1.086186 | 0.975 | 0.329 | 4.1E-171 | 6 | 0.33421  |
| OST4     | 6.07E-25 | 0.264403 | 1     | 0.958 | 2.04E-20 | 6 | 0.958175 |
| OSTC     | 2.49E-33 | 0.358216 | 0.95  | 0.828 | 8.35E-29 | 6 | 0.829253 |
| OTX2     | 0        | 0.894443 | 0.862 | 0.047 | 0        | 6 | 0.05412  |
| P4HTM    | 7.51E-30 | 0.273197 | 0.665 | 0.329 | 2.52E-25 | 6 | 0.332255 |
| PARD6B   | 1.12E-67 | 0.332876 | 0.556 | 0.155 | 3.75E-63 | 6 | 0.158807 |
| PAX6     | 1.08E-76 | 0.891506 | 0.967 | 0.721 | 3.64E-72 | 6 | 0.722753 |
| PCBD1    | 4.99E-83 | 0.586177 | 0.883 | 0.411 | 1.67E-78 | 6 | 0.414875 |
| PCDH7    | 6E-246   | 0.576469 | 0.661 | 0.076 | 2E-241   | 6 | 0.080523 |
| PCDH9    | 3.4E-122 | 1.040759 | 0.828 | 0.24  | 1.1E-117 | 6 | 0.245478 |
| PCMTD2   | 7.14E-26 | 0.285379 | 0.603 | 0.312 | 2.39E-21 | 6 | 0.314026 |
| PCP4     | 3.25E-77 | 0.266568 | 0.406 | 0.075 | 1.09E-72 | 6 | 0.077751 |
| PCYOX1   | 2.42E-26 | 0.278276 | 0.665 | 0.353 | 8.1E-22  | 6 | 0.35578  |
| PDE4D    | 3.8E-212 | 0.595517 | 0.644 | 0.085 | 1.3E-207 | 6 | 0.089371 |
| PDGFA    | 0        | 0.545589 | 0.644 | 0.043 | 0        | 6 | 0.047866 |
| PDIA3    | 6.79E-24 | 0.316034 | 0.925 | 0.759 | 2.28E-19 | 6 | 0.759959 |
| PDLIM2   | 2.21E-97 | 0.64439  | 0.883 | 0.352 | 7.43E-93 | 6 | 0.356455 |
| PDLIM5   | 1.76E-50 | 0.305363 | 0.544 | 0.177 | 5.89E-46 | 6 | 0.180342 |
| PDPN     | 0        | 0.418616 | 0.552 | 0.037 | 0        | 6 | 0.041754 |
| PERP     | 0        | 0.424379 | 0.582 | 0.046 | 0        | 6 | 0.050709 |
| PEX7     | 2.4E-114 | 0.36919  | 0.481 | 0.081 | 7.9E-110 | 6 | 0.084361 |
| PFDN5    | 8.32E-38 | 0.302569 | 1     | 0.983 | 2.79E-33 | 6 | 0.982765 |
| PGM5     | 0        | 0.627755 | 0.678 | 0.006 | 0        | 6 | 0.011371 |
| PGM5-AS1 | 0        | 0.917844 | 0.561 | 0.005 | 0        | 6 | 0.009595 |
| PHACTR2  | 0        | 1.006135 | 0.908 | 0.127 | 0        | 6 | 0.133506 |
| PIP5K1B  | 2.7E-232 | 0.256937 | 0.339 | 0.021 | 8.9E-228 | 6 | 0.023489 |
| PLA2G16  | 0        | 0.422355 | 0.502 | 0.021 | 0        | 6 | 0.025337 |
| PLAC9    | 0        | 0.621189 | 0.64  | 0.022 | 0        | 6 | 0.02754  |
| PLD3     | 6.97E-29 | 0.343354 | 0.929 | 0.728 | 2.34E-24 | 6 | 0.729967 |
| PLD5     | 0        | 0.333831 | 0.423 | 0.009 | 0        | 6 | 0.012793 |
| PLK2     | 2.3E-101 | 0.741022 | 0.653 | 0.161 | 7.56E-97 | 6 | 0.165062 |
| PLS3     | 3.62E-58 | 0.262126 | 0.799 | 0.341 | 1.22E-53 | 6 | 0.345084 |
| PLTP     | 1.98E-74 | 0.549446 | 0.866 | 0.394 | 6.64E-70 | 6 | 0.397925 |
| PMEL     | 0        | 4.175827 | 0.996 | 0.022 | 0        | 6 | 0.02985  |
| PPIB     | 3.64E-20 | 0.261924 | 0.954 | 0.878 | 1.22E-15 | 6 | 0.87854  |
| PPP2R5A  | 2.76E-76 | 0.253189 | 0.431 | 0.088 | 9.27E-72 | 6 | 0.09097  |
| PRDX6    | 5.5E-124 | 1.093648 | 1     | 0.861 | 1.9E-119 | 6 | 0.862443 |
| PRR5     | 3.66E-73 | 0.277283 | 0.506 | 0.119 | 1.23E-68 | 6 | 0.122455 |
| PSAP     | 3.02E-77 | 0.647064 | 0.895 | 0.508 | 1.01E-72 | 6 | 0.51146  |

|            |          |          |       |       |          |   |          |
|------------|----------|----------|-------|-------|----------|---|----------|
| PSAT1      | 3.1E-22  | 0.406443 | 0.933 | 0.708 | 1.04E-17 | 6 | 0.70957  |
| PTGDS      | 0        | 1.70502  | 0.64  | 0.023 | 0        | 6 | 0.028286 |
| PTP4A3     | 1.11E-39 | 0.277507 | 0.49  | 0.172 | 3.73E-35 | 6 | 0.175047 |
| PTPMT1     | 6.01E-60 | 0.326041 | 0.661 | 0.22  | 2.02E-55 | 6 | 0.223517 |
| PTTG1IP    | 4.77E-25 | 0.29875  | 0.824 | 0.602 | 1.6E-20  | 6 | 0.603568 |
| PXDN       | 2.8E-68  | 0.475121 | 0.828 | 0.377 | 9.38E-64 | 6 | 0.380441 |
| QPRT       | 0        | 1.402374 | 0.954 | 0.146 | 0        | 6 | 0.15298  |
| RAB11FIP1  | 1.9E-234 | 0.345068 | 0.519 | 0.048 | 6.4E-230 | 6 | 0.051668 |
| RAB13      | 4.31E-43 | 0.470212 | 0.916 | 0.597 | 1.45E-38 | 6 | 0.600085 |
| RAB27A     | 4.6E-269 | 0.486367 | 0.536 | 0.046 | 1.5E-264 | 6 | 0.050389 |
| RAB32      | 2.7E-265 | 0.533142 | 0.695 | 0.08  | 9.1E-261 | 6 | 0.084965 |
| RAB34      | 1.98E-70 | 0.468554 | 0.782 | 0.317 | 6.63E-66 | 6 | 0.320635 |
| RAB38      | 0        | 2.038326 | 0.983 | 0.08  | 0        | 6 | 0.087808 |
| RAB3IP     | 2.32E-45 | 0.30867  | 0.544 | 0.19  | 7.78E-41 | 6 | 0.192602 |
| RABAC1     | 1.35E-24 | 0.260603 | 0.979 | 0.92  | 4.53E-20 | 6 | 0.920365 |
| RAI14      | 1.44E-52 | 0.423875 | 0.686 | 0.292 | 4.82E-48 | 6 | 0.295476 |
| RARRES2    | 0        | 0.587495 | 0.561 | 0.039 | 0        | 6 | 0.042962 |
| RASSF8     | 5.6E-106 | 0.609288 | 0.728 | 0.21  | 1.9E-101 | 6 | 0.214882 |
| RASSF8-AS1 | 5.41E-53 | 0.354607 | 0.619 | 0.22  | 1.81E-48 | 6 | 0.223766 |
| RBMS1      | 0        | 1.159851 | 0.891 | 0.066 | 0        | 6 | 0.073132 |
| RBP1       | 1.7E-289 | 1.842014 | 0.983 | 0.196 | 5.7E-285 | 6 | 0.202658 |
| RBP7       | 0        | 0.375867 | 0.372 | 0.006 | 0        | 6 | 0.009417 |
| RBPMS      | 0        | 0.487418 | 0.623 | 0.055 | 0        | 6 | 0.059522 |
| RDH10      | 3.9E-137 | 0.846158 | 0.724 | 0.17  | 1.3E-132 | 6 | 0.174443 |
| REEP3      | 7.03E-26 | 0.267852 | 0.653 | 0.345 | 2.36E-21 | 6 | 0.347927 |
| REEP5      | 4.51E-23 | 0.322821 | 0.762 | 0.486 | 1.51E-18 | 6 | 0.488575 |
| RELN       | 1.5E-240 | 0.451409 | 0.611 | 0.063 | 5.2E-236 | 6 | 0.067624 |
| REST       | 7.26E-20 | 0.265    | 0.745 | 0.472 | 2.43E-15 | 6 | 0.474574 |
| RFLNB      | 1.3E-295 | 0.788807 | 0.782 | 0.098 | 4.4E-291 | 6 | 0.103692 |
| RHOC       | 1.8E-116 | 0.976091 | 0.941 | 0.431 | 6.1E-112 | 6 | 0.434953 |
| RNF13      | 7.55E-34 | 0.267199 | 0.699 | 0.331 | 2.53E-29 | 6 | 0.334316 |
| RNF7       | 7.24E-34 | 0.370426 | 0.975 | 0.872 | 2.43E-29 | 6 | 0.872855 |
| RPL10A     | 1.15E-38 | 0.290079 | 1     | 0.996 | 3.85E-34 | 6 | 0.996233 |
| RPL12      | 7.43E-39 | 0.315342 | 1     | 0.996 | 2.49E-34 | 6 | 0.99634  |
| RPL13A     | 1.15E-39 | 0.312638 | 0.996 | 0.987 | 3.87E-35 | 6 | 0.987456 |
| RPL15      | 4.18E-74 | 0.335125 | 1     | 0.999 | 1.4E-69  | 6 | 0.998792 |
| RPL18      | 1.12E-49 | 0.291451 | 1     | 0.998 | 3.75E-45 | 6 | 0.998294 |
| RPL19      | 2.27E-52 | 0.317803 | 1     | 0.999 | 7.63E-48 | 6 | 0.998579 |
| RPL23      | 1.48E-25 | 0.277686 | 1     | 0.989 | 4.97E-21 | 6 | 0.989268 |
| RPL26      | 2.97E-64 | 0.375427 | 1     | 0.998 | 9.95E-60 | 6 | 0.997584 |
| RPL35A     | 1.54E-66 | 0.357499 | 1     | 0.998 | 5.16E-62 | 6 | 0.998081 |
| RPL5       | 4.59E-41 | 0.261805 | 1     | 0.998 | 1.54E-36 | 6 | 0.998508 |
| RPL7       | 4.4E-42  | 0.321214 | 0.996 | 0.99  | 1.48E-37 | 6 | 0.990157 |
| RPL7A      | 1.15E-42 | 0.279119 | 1     | 0.999 | 3.84E-38 | 6 | 0.998969 |
| RPLP1      | 8.56E-74 | 0.405807 | 1     | 0.999 | 2.87E-69 | 6 | 0.998969 |
| RPS12      | 2.45E-81 | 0.441876 | 1     | 0.998 | 8.21E-77 | 6 | 0.998436 |
| RPS14      | 3.25E-41 | 0.289792 | 1     | 0.999 | 1.09E-36 | 6 | 0.998792 |
| RPS18      | 3.77E-37 | 0.279903 | 1     | 0.999 | 1.26E-32 | 6 | 0.999041 |

|          |          |          |       |       |          |   |          |
|----------|----------|----------|-------|-------|----------|---|----------|
| RPS23    | 3.45E-42 | 0.274798 | 1     | 0.998 | 1.16E-37 | 6 | 0.998294 |
| RPS27    | 2.98E-29 | 0.276046 | 1     | 0.999 | 9.99E-25 | 6 | 0.998579 |
| RPS27A   | 9.04E-42 | 0.269554 | 1     | 0.998 | 3.03E-37 | 6 | 0.998365 |
| RPS28    | 6.86E-51 | 0.350992 | 1     | 0.998 | 2.3E-46  | 6 | 0.997548 |
| RPS3A    | 4.97E-43 | 0.300566 | 1     | 0.999 | 1.67E-38 | 6 | 0.998721 |
| RPS4X    | 9.15E-64 | 0.547256 | 1     | 0.998 | 3.07E-59 | 6 | 0.998436 |
| RPS6     | 2.98E-29 | 0.285454 | 1     | 0.997 | 1E-24    | 6 | 0.997513 |
| RPS7     | 1.01E-33 | 0.263053 | 1     | 0.998 | 3.37E-29 | 6 | 0.997974 |
| RPS9     | 2.9E-58  | 0.331234 | 1     | 0.998 | 9.74E-54 | 6 | 0.997619 |
| RRAD     | 0        | 0.286929 | 0.314 | 0.007 | 0        | 6 | 0.009168 |
| S100A10  | 7.8E-164 | 0.506597 | 0.473 | 0.055 | 2.6E-159 | 6 | 0.058171 |
| S100A13  | 1E-124   | 0.585319 | 0.753 | 0.193 | 3.4E-120 | 6 | 0.197292 |
| SDC2     | 3.05E-57 | 0.336971 | 0.678 | 0.239 | 1.02E-52 | 6 | 0.242884 |
| SDCBP    | 2.94E-44 | 0.489011 | 0.979 | 0.767 | 9.86E-40 | 6 | 0.769091 |
| SEC11A   | 3.72E-98 | 0.692276 | 1     | 0.873 | 1.25E-93 | 6 | 0.874276 |
| SEMA6D   | 1.4E-226 | 0.440818 | 0.548 | 0.056 | 4.8E-222 | 6 | 0.060268 |
| SERF2    | 4.51E-39 | 0.299018 | 1     | 0.987 | 1.51E-34 | 6 | 0.986923 |
| SERPINF1 | 0        | 2.53277  | 0.996 | 0.043 | 0        | 6 | 0.051349 |
| SERPINH1 | 1.97E-89 | 0.455085 | 0.695 | 0.199 | 6.62E-85 | 6 | 0.203191 |
| SESN3    | 6.29E-92 | 0.899548 | 0.879 | 0.415 | 2.11E-87 | 6 | 0.419317 |
| SGCD     | 0        | 0.265717 | 0.318 | 0.009 | 0        | 6 | 0.011478 |
| SGK1     | 0        | 0.762227 | 0.644 | 0.054 | 0        | 6 | 0.05874  |
| SHC2     | 1.28E-39 | 0.272658 | 0.636 | 0.257 | 4.31E-35 | 6 | 0.26019  |
| SIX3     | 2.3E-107 | 0.501697 | 0.762 | 0.207 | 7.6E-103 | 6 | 0.212004 |
| SLC24A5  | 0        | 0.596469 | 0.582 | 0.004 | 0        | 6 | 0.008493 |
| SLC25A26 | 9.29E-73 | 0.758182 | 0.72  | 0.289 | 3.12E-68 | 6 | 0.292669 |
| SLC25A6  | 5.89E-39 | 0.349099 | 1     | 0.977 | 1.98E-34 | 6 | 0.977577 |
| SLC2A1   | 9.1E-243 | 1.306137 | 0.929 | 0.198 | 3.1E-238 | 6 | 0.204328 |
| SLC35D3  | 0        | 0.811853 | 0.686 | 0.001 | 0        | 6 | 0.006574 |
| SLC35G1  | 3.7E-205 | 0.803847 | 0.695 | 0.109 | 1.3E-200 | 6 | 0.1135   |
| SLC3A2   | 1.3E-116 | 1.129261 | 0.983 | 0.768 | 4.4E-112 | 6 | 0.770228 |
| SLC45A2  | 0        | 0.471487 | 0.54  | 0.002 | 0        | 6 | 0.006539 |
| SLC4A2   | 1.88E-71 | 0.380947 | 0.653 | 0.203 | 6.32E-67 | 6 | 0.207313 |
| SLC4A4   | 0        | 0.468772 | 0.498 | 0.017 | 0        | 6 | 0.020859 |
| SLC6A15  | 1.2E-145 | 0.700569 | 0.699 | 0.146 | 3.9E-141 | 6 | 0.15099  |
| SLC7A2   | 0        | 0.655596 | 0.611 | 0.003 | 0        | 6 | 0.007818 |
| SLC7A5   | 3.75E-43 | 0.287308 | 0.423 | 0.128 | 1.26E-38 | 6 | 0.130273 |
| SLC7A6   | 4.2E-116 | 0.46495  | 0.628 | 0.137 | 1.4E-111 | 6 | 0.141324 |
| SLC7A8   | 0        | 1.311588 | 0.895 | 0.03  | 0        | 6 | 0.036886 |
| SMAD3    | 1.05E-62 | 0.301845 | 0.561 | 0.165 | 3.51E-58 | 6 | 0.168011 |
| SMIM1    | 2.27E-72 | 0.267005 | 0.402 | 0.081 | 7.6E-68  | 6 | 0.084077 |
| SNCA     | 1.7E-109 | 0.994677 | 0.908 | 0.338 | 5.6E-105 | 6 | 0.34288  |
| SNHG18   | 7E-242   | 0.301493 | 0.448 | 0.035 | 2.3E-237 | 6 | 0.038058 |
| SNHG7    | 4.29E-25 | 0.405403 | 0.874 | 0.734 | 1.44E-20 | 6 | 0.734729 |
| SNHG8    | 3.06E-56 | 0.548588 | 0.937 | 0.605 | 1.03E-51 | 6 | 0.608187 |
| SOX6     | 2.89E-53 | 0.320204 | 0.569 | 0.19  | 9.71E-49 | 6 | 0.193028 |
| SP5      | 0        | 0.349515 | 0.431 | 0.021 | 0        | 6 | 0.024271 |
| SPARC    | 1.2E-158 | 1.531694 | 0.992 | 0.496 | 4.1E-154 | 6 | 0.500586 |

|          |          |          |       |       |          |   |          |
|----------|----------|----------|-------|-------|----------|---|----------|
| SPATS2L  | 5.4E-126 | 0.980922 | 0.883 | 0.317 | 1.8E-121 | 6 | 0.32227  |
| SPOCK1   | 3.8E-131 | 0.724348 | 0.766 | 0.195 | 1.3E-126 | 6 | 0.19946  |
| SPOCK3   | 0        | 0.269079 | 0.343 | 0.014 | 0        | 6 | 0.016773 |
| SQSTM1   | 2.13E-41 | 0.401281 | 0.858 | 0.507 | 7.15E-37 | 6 | 0.509577 |
| SSNA1    | 1.53E-21 | 0.353423 | 0.921 | 0.796 | 5.12E-17 | 6 | 0.79752  |
| SSPN     | 0        | 0.387121 | 0.494 | 0.031 | 0        | 6 | 0.034505 |
| SSR2     | 4.65E-26 | 0.278347 | 0.992 | 0.937 | 1.56E-21 | 6 | 0.937245 |
| SSR3     | 6.09E-33 | 0.322143 | 0.904 | 0.642 | 2.04E-28 | 6 | 0.644149 |
| SSR4     | 2.94E-21 | 0.258572 | 0.979 | 0.911 | 9.85E-17 | 6 | 0.911553 |
| STRA6    | 2E-198   | 0.629964 | 0.757 | 0.131 | 6.8E-194 | 6 | 0.1361   |
| STT3B    | 6.48E-62 | 0.591866 | 0.87  | 0.478 | 2.17E-57 | 6 | 0.481397 |
| SYNGR1   | 8.21E-42 | 0.264756 | 0.506 | 0.177 | 2.75E-37 | 6 | 0.179382 |
| SYT17    | 9.4E-211 | 0.43016  | 0.586 | 0.069 | 3.2E-206 | 6 | 0.07338  |
| TACC1    | 6.43E-35 | 0.266014 | 0.519 | 0.2   | 2.15E-30 | 6 | 0.203156 |
| TAGLN    | 5.3E-128 | 0.817989 | 0.372 | 0.044 | 1.8E-123 | 6 | 0.047155 |
| TAX1BP1  | 3.69E-46 | 0.413003 | 0.874 | 0.515 | 1.24E-41 | 6 | 0.518496 |
| TCEAL9   | 1.32E-15 | 0.255915 | 0.921 | 0.759 | 4.44E-11 | 6 | 0.760741 |
| TFPI2    | 1.3E-112 | 0.306301 | 0.159 | 0.009 | 4.2E-108 | 6 | 0.010625 |
| TGDS     | 4.5E-140 | 0.417224 | 0.623 | 0.113 | 1.5E-135 | 6 | 0.116876 |
| TGFB2    | 0        | 0.282667 | 0.331 | 0.014 | 0        | 6 | 0.01624  |
| TIMP1    | 1.72E-84 | 0.607252 | 0.87  | 0.369 | 5.77E-80 | 6 | 0.37369  |
| TIMP2    | 1.71E-48 | 0.436975 | 0.849 | 0.473 | 5.74E-44 | 6 | 0.476067 |
| TIMP3    | 3.8E-269 | 0.628661 | 0.674 | 0.074 | 1.3E-264 | 6 | 0.079421 |
| TLE4     | 1.48E-19 | 0.313051 | 0.887 | 0.679 | 4.95E-15 | 6 | 0.681106 |
| TMBIM4   | 1.35E-30 | 0.319189 | 0.854 | 0.551 | 4.52E-26 | 6 | 0.553463 |
| TMED4    | 6.41E-20 | 0.281723 | 0.808 | 0.564 | 2.15E-15 | 6 | 0.566149 |
| TMEFF2   | 1.9E-250 | 1.343168 | 0.933 | 0.182 | 6.5E-246 | 6 | 0.18887  |
| TMEM101  | 3.51E-38 | 0.30005  | 0.669 | 0.3   | 1.18E-33 | 6 | 0.302903 |
| TMEM141  | 8.82E-28 | 0.271898 | 0.753 | 0.421 | 2.96E-23 | 6 | 0.42351  |
| TMEM147  | 3.37E-20 | 0.263297 | 0.908 | 0.767 | 1.13E-15 | 6 | 0.768132 |
| TMEM14C  | 1.49E-29 | 0.32279  | 0.941 | 0.802 | 5E-25    | 6 | 0.803063 |
| TMEM159  | 8.01E-88 | 0.300904 | 0.531 | 0.116 | 2.69E-83 | 6 | 0.119043 |
| TMEM176E | 0        | 0.379868 | 0.36  | 0.003 | 0        | 6 | 0.006503 |
| TMEM179E | 3.31E-40 | 0.3552   | 0.762 | 0.391 | 1.11E-35 | 6 | 0.394194 |
| TMEM205  | 1.6E-25  | 0.268365 | 0.762 | 0.46  | 5.38E-21 | 6 | 0.462492 |
| TMEM245  | 2.12E-38 | 0.292092 | 0.661 | 0.294 | 7.1E-34  | 6 | 0.296969 |
| TMEM37   | 0        | 0.296244 | 0.368 | 0.006 | 0        | 6 | 0.008919 |
| TMEM59   | 2.62E-20 | 0.251657 | 0.946 | 0.822 | 8.78E-16 | 6 | 0.823318 |
| TMEM88   | 1.7E-177 | 0.350688 | 0.435 | 0.044 | 5.6E-173 | 6 | 0.047511 |
| TMEM98   | 5.36E-90 | 1.007604 | 0.979 | 0.73  | 1.8E-85  | 6 | 0.731673 |
| TNNC1    | 0        | 0.440848 | 0.41  | 0.011 | 0        | 6 | 0.014356 |
| TPM1     | 5.26E-28 | 0.793061 | 0.912 | 0.777 | 1.77E-23 | 6 | 0.778046 |
| TPM2     | 0        | 1.254115 | 0.912 | 0.051 | 0        | 6 | 0.057994 |
| TPP1     | 4.97E-93 | 0.352238 | 0.573 | 0.13  | 1.67E-88 | 6 | 0.134217 |
| TPRN     | 1.36E-81 | 0.621139 | 0.736 | 0.277 | 4.55E-77 | 6 | 0.281262 |
| TRAPPC2L | 4.79E-40 | 0.477382 | 0.921 | 0.743 | 1.61E-35 | 6 | 0.744074 |
| TRMT112  | 1.94E-24 | 0.296945 | 0.979 | 0.857 | 6.51E-20 | 6 | 0.85761  |
| TRPM1    | 0        | 1.586965 | 0.916 | 0.003 | 0        | 6 | 0.010341 |

|            |          |          |       |       |          |   |          |
|------------|----------|----------|-------|-------|----------|---|----------|
| TRPM3      | 0        | 2.350204 | 1     | 0.075 | 0        | 6 | 0.083224 |
| TSC22D1    | 2.53E-09 | 0.494509 | 0.921 | 0.882 | 8.49E-05 | 6 | 0.881987 |
| TSC22D3    | 1.08E-60 | 0.342342 | 0.653 | 0.214 | 3.63E-56 | 6 | 0.217263 |
| TSPAN10    | 0        | 1.408901 | 0.929 | 0.051 | 0        | 6 | 0.0581   |
| TUBA1C     | 8.68E-64 | 0.333533 | 0.502 | 0.124 | 2.91E-59 | 6 | 0.127465 |
| TYR        | 0        | 0.803879 | 0.607 | 0.001 | 0        | 6 | 0.006361 |
| TYRP1      | 0        | 2.020501 | 0.904 | 0.003 | 0        | 6 | 0.011123 |
| UPP1       | 5.9E-123 | 0.452769 | 0.435 | 0.062 | 2E-118   | 6 | 0.065314 |
| UQCRB      | 3.37E-30 | 0.295567 | 1     | 0.965 | 1.13E-25 | 6 | 0.965495 |
| USP18      | 7.5E-137 | 0.274651 | 0.36  | 0.038 | 2.5E-132 | 6 | 0.04115  |
| UTRN       | 3.93E-31 | 0.261222 | 0.552 | 0.242 | 1.32E-26 | 6 | 0.244661 |
| VAMP3      | 3.24E-74 | 0.375637 | 0.628 | 0.187 | 1.09E-69 | 6 | 0.190505 |
| VAT1       | 2.27E-45 | 0.320437 | 0.749 | 0.331 | 7.61E-41 | 6 | 0.334636 |
| VCL        | 8.76E-60 | 0.418874 | 0.665 | 0.244 | 2.94E-55 | 6 | 0.247681 |
| VEGFB      | 2.01E-51 | 0.494439 | 0.916 | 0.574 | 6.73E-47 | 6 | 0.576881 |
| VGLL4      | 2.91E-28 | 0.29106  | 0.891 | 0.621 | 9.77E-24 | 6 | 0.623077 |
| VIM        | 1.52E-27 | 0.430528 | 1     | 0.953 | 5.09E-23 | 6 | 0.953875 |
| VKORC1     | 1.94E-18 | 0.259313 | 0.916 | 0.763 | 6.51E-14 | 6 | 0.764507 |
| WASF2      | 4.86E-45 | 0.39586  | 0.854 | 0.478 | 1.63E-40 | 6 | 0.481326 |
| WDR83OS    | 4.31E-26 | 0.277683 | 0.979 | 0.877 | 1.45E-21 | 6 | 0.877758 |
| WFDC1      | 0        | 0.753338 | 0.506 | 0.001 | 0        | 6 | 0.005472 |
| WLS        | 9.2E-150 | 0.653706 | 0.921 | 0.244 | 3.1E-145 | 6 | 0.249991 |
| WNT2B      | 0        | 2.161774 | 0.925 | 0.108 | 0        | 6 | 0.114637 |
| WNT5A      | 9.3E-117 | 0.266453 | 0.41  | 0.057 | 3.1E-112 | 6 | 0.059699 |
| ZFAS1      | 9.09E-34 | 0.32351  | 0.992 | 0.978 | 3.05E-29 | 6 | 0.978537 |
| ZFHX3      | 3.03E-42 | 0.276001 | 0.674 | 0.283 | 1.02E-37 | 6 | 0.285882 |
| ZFHX4      | 1.22E-35 | 0.365723 | 0.72  | 0.344 | 4.09E-31 | 6 | 0.346754 |
| ZFP36L2    | 5.68E-40 | 0.463395 | 0.837 | 0.498 | 1.9E-35  | 6 | 0.500657 |
| ZNF106     | 9.68E-56 | 0.598116 | 0.828 | 0.486 | 3.25E-51 | 6 | 0.489215 |
| ZNF330     | 3.82E-31 | 0.276782 | 0.707 | 0.372 | 1.28E-26 | 6 | 0.374436 |
| ZNF503     | 0        | 1.122948 | 0.929 | 0.118 | 0        | 6 | 0.124658 |
| ZNF503-AS1 | 1.8E-166 | 0.252671 | 0.41  | 0.041 | 6.1E-162 | 6 | 0.044384 |
| ABCA5      | 5.75E-81 | 0.362526 | 0.444 | 0.06  | 1.93E-76 | 7 | 0.062187 |
| ABLIM1     | 2.57E-87 | 0.251225 | 0.423 | 0.05  | 8.6E-83  | 7 | 0.051491 |
| ABRACL     | 1.28E-24 | 0.63735  | 0.887 | 0.708 | 4.3E-20  | 7 | 0.70925  |
| AC004233.  | 0        | 1.009566 | 0.641 | 0.001 | 0        | 7 | 0.004371 |
| AC245297.  | 4.89E-51 | 0.266671 | 0.415 | 0.076 | 1.64E-46 | 7 | 0.077503 |
| ACTG2      | 0        | 0.458719 | 0.239 | 0.004 | 0        | 7 | 0.004904 |
| ACTN1      | 5.04E-11 | 0.399871 | 0.57  | 0.36  | 1.69E-06 | 7 | 0.360613 |
| ACTN4      | 1.83E-20 | 0.419654 | 0.754 | 0.459 | 6.14E-16 | 7 | 0.460396 |
| ADI1       | 2.35E-14 | 0.263604 | 0.655 | 0.348 | 7.88E-10 | 7 | 0.350023 |
| AES        | 4.74E-09 | 0.264543 | 0.951 | 0.907 | 0.000159 | 7 | 0.907502 |
| AHNAK      | 9.98E-38 | 0.689339 | 0.606 | 0.233 | 3.35E-33 | 7 | 0.234782 |
| AKAP12     | 8.08E-11 | 0.505608 | 0.739 | 0.602 | 2.71E-06 | 7 | 0.602857 |
| AKR1B1     | 5.52E-06 | 0.25595  | 0.831 | 0.71  | 0.185052 | 7 | 0.710351 |
| AL390719.  | 0        | 0.344597 | 0.261 | 0     | 0        | 7 | 0.001599 |
| ALCAM      | 2E-142   | 0.35619  | 0.444 | 0.036 | 6.6E-138 | 7 | 0.037774 |
| ANOS1      | 1.38E-46 | 0.259483 | 0.31  | 0.05  | 4.63E-42 | 7 | 0.050816 |



|          |          |          |       |       |          |   |          |
|----------|----------|----------|-------|-------|----------|---|----------|
| ANXA1    | 0        | 1.709588 | 0.676 | 0.033 | 0        | 7 | 0.036353 |
| ANXA2    | 7.1E-164 | 2.186796 | 0.937 | 0.179 | 2.4E-159 | 7 | 0.1829   |
| ANXA3    | 0        | 0.843798 | 0.57  | 0.021 | 0        | 7 | 0.023311 |
| ANXA4    | 2.5E-155 | 0.388481 | 0.458 | 0.036 | 8.5E-151 | 7 | 0.037952 |
| AP1M2    | 0        | 0.34477  | 0.437 | 0.002 | 0        | 7 | 0.003696 |
| APCDD1   | 7.79E-67 | 1.600004 | 0.669 | 0.191 | 2.61E-62 | 7 | 0.192921 |
| APLP2    | 8.95E-18 | 0.393217 | 0.852 | 0.721 | 3E-13    | 7 | 0.721581 |
| APMAP    | 8.22E-14 | 0.319011 | 0.789 | 0.526 | 2.76E-09 | 7 | 0.527806 |
| APOE     | 3.1E-261 | 1.93524  | 0.704 | 0.054 | 1E-256   | 7 | 0.056892 |
| APP      | 1.93E-23 | 0.405221 | 0.908 | 0.71  | 6.46E-19 | 7 | 0.711275 |
| AQP3     | 0        | 0.98663  | 0.303 | 0.006 | 0        | 7 | 0.007533 |
| AREG     | 0        | 0.747284 | 0.197 | 0     | 0        | 7 | 0.001173 |
| ARHGAP29 | 0        | 1.152312 | 0.697 | 0.025 | 0        | 7 | 0.028855 |
| ARHGDIG  | 3.7E-08  | 0.588634 | 0.289 | 0.146 | 0.00124  | 7 | 0.147081 |
| ARHGEF19 | 3.56E-40 | 0.255573 | 0.408 | 0.088 | 1.19E-35 | 7 | 0.089229 |
| ARHGEF35 | 0        | 0.336205 | 0.373 | 0.002 | 0        | 7 | 0.003625 |
| ARHGEF5  | 0        | 0.31481  | 0.415 | 0.002 | 0        | 7 | 0.003696 |
| ARID5B   | 1.78E-09 | 0.315349 | 0.535 | 0.341 | 5.97E-05 | 7 | 0.341992 |
| ARPC1B   | 1.09E-32 | 0.251088 | 0.458 | 0.126 | 3.66E-28 | 7 | 0.127536 |
| ARPC2    | 1.23E-49 | 0.771012 | 0.993 | 0.951 | 4.12E-45 | 7 | 0.951246 |
| ASAH1    | 1.35E-15 | 0.312356 | 0.81  | 0.537 | 4.51E-11 | 7 | 0.538858 |
| ATF5     | 3.04E-25 | 0.957873 | 0.592 | 0.243 | 1.02E-20 | 7 | 0.244696 |
| ATOX1    | 6.22E-11 | 0.281022 | 0.937 | 0.858 | 2.09E-06 | 7 | 0.858569 |
| ATP1A1   | 1.43E-11 | 0.251893 | 0.718 | 0.44  | 4.81E-07 | 7 | 0.441313 |
| ATP6V0E1 | 2.39E-24 | 0.433735 | 0.93  | 0.752 | 8.01E-20 | 7 | 0.753314 |
| B2M      | 1.47E-06 | 0.256286 | 0.641 | 0.57  | 0.049247 | 7 | 0.570555 |
| BCAM     | 8.37E-65 | 1.584702 | 0.718 | 0.256 | 2.81E-60 | 7 | 0.258449 |
| BCAP31   | 3.1E-11  | 0.263799 | 0.852 | 0.628 | 1.04E-06 | 7 | 0.628833 |
| BLVRB    | 2.94E-26 | 0.372129 | 0.739 | 0.36  | 9.86E-22 | 7 | 0.361643 |
| BMP7     | 3.09E-12 | 0.329664 | 0.577 | 0.339 | 1.04E-07 | 7 | 0.339967 |
| BRINP1   | 5.1E-210 | 0.522387 | 0.493 | 0.031 | 1.7E-205 | 7 | 0.032977 |
| C11orf1  | 9.02E-09 | 0.255041 | 0.648 | 0.432 | 0.000303 | 7 | 0.433282 |
| C1orf21  | 7.77E-12 | 0.302909 | 0.634 | 0.4   | 2.61E-07 | 7 | 0.401585 |
| C1orf54  | 5.44E-25 | 0.328384 | 0.38  | 0.116 | 1.83E-20 | 7 | 0.117089 |
| C4orf3   | 1.39E-21 | 0.461085 | 0.951 | 0.772 | 4.67E-17 | 7 | 0.772503 |
| C9orf3   | 4.12E-63 | 0.359104 | 0.507 | 0.097 | 1.38E-58 | 7 | 0.098611 |
| CALB2    | 9.31E-10 | 0.99235  | 0.261 | 0.114 | 3.12E-05 | 7 | 0.114317 |
| CALD1    | 2.7E-19  | 0.627492 | 0.894 | 0.794 | 9.05E-15 | 7 | 0.794712 |
| CALR     | 5.16E-14 | 0.393632 | 0.958 | 0.894 | 1.73E-09 | 7 | 0.894496 |
| CAPG     | 2.26E-64 | 0.603721 | 0.627 | 0.153 | 7.57E-60 | 7 | 0.15497  |
| CAPN1    | 1.41E-30 | 0.432918 | 0.796 | 0.402 | 4.74E-26 | 7 | 0.403895 |
| CARMIL1  | 1.2E-21  | 0.254636 | 0.479 | 0.173 | 4.02E-17 | 7 | 0.174514 |
| CAST     | 1.15E-51 | 0.433534 | 0.627 | 0.171 | 3.87E-47 | 7 | 0.173164 |
| CAV1     | 0        | 1.025937 | 0.563 | 0.007 | 0        | 7 | 0.009666 |
| CAV2     | 0        | 0.436225 | 0.387 | 0.006 | 0        | 7 | 0.007995 |
| CCDC186  | 2.98E-20 | 0.254957 | 0.57  | 0.242 | 1E-15    | 7 | 0.243844 |
| CCDC3    | 0        | 0.544333 | 0.43  | 0.009 | 0        | 7 | 0.011016 |
| CCDC80   | 3.14E-72 | 0.379794 | 0.331 | 0.038 | 1.05E-67 | 7 | 0.0398   |



|          |          |          |       |       |          |   |          |
|----------|----------|----------|-------|-------|----------|---|----------|
| CD164    | 6.36E-17 | 0.285628 | 0.641 | 0.336 | 2.13E-12 | 7 | 0.337088 |
| CD81     | 6.16E-14 | 0.303292 | 0.972 | 0.956 | 2.07E-09 | 7 | 0.956469 |
| CD9      | 9.3E-233 | 1.241087 | 0.746 | 0.069 | 3.1E-228 | 7 | 0.072385 |
| CDC42    | 4.17E-19 | 0.333687 | 0.993 | 0.874 | 1.4E-14  | 7 | 0.874205 |
| CDC42EP5 | 6.58E-75 | 0.418049 | 0.514 | 0.088 | 2.21E-70 | 7 | 0.089975 |
| CDH1     | 0        | 0.581397 | 0.514 | 0.001 | 0        | 7 | 0.003305 |
| CDH3     | 0        | 0.690118 | 0.599 | 0.009 | 0        | 7 | 0.011478 |
| CDKN1C   | 1.19E-23 | 0.478197 | 0.599 | 0.243 | 3.98E-19 | 7 | 0.244448 |
| CEBPB    | 2.04E-46 | 0.278985 | 0.366 | 0.066 | 6.85E-42 | 7 | 0.067304 |
| CEBPD    | 0        | 0.520992 | 0.437 | 0.014 | 0        | 7 | 0.016062 |
| CFI      | 5.33E-36 | 0.268485 | 0.408 | 0.096 | 1.79E-31 | 7 | 0.097971 |
| CLDN4    | 0        | 0.702681 | 0.549 | 0.005 | 0        | 7 | 0.008031 |
| CLDN6    | 0        | 1.045384 | 0.81  | 0.02  | 0        | 7 | 0.023667 |
| CLDN7    | 0        | 0.360403 | 0.303 | 0     | 0        | 7 | 0.001848 |
| CLIC1    | 2.27E-19 | 0.463409 | 0.923 | 0.741 | 7.62E-15 | 7 | 0.742085 |
| COL17A1  | 0        | 0.903211 | 0.57  | 0.002 | 0        | 7 | 0.004371 |
| COL18A1  | 5.3E-36  | 0.65861  | 0.655 | 0.278 | 1.78E-31 | 7 | 0.279983 |
| COL1A2   | 0        | 0.882197 | 0.627 | 0.032 | 0        | 7 | 0.035251 |
| COL3A1   | 1.2E-249 | 0.335623 | 0.38  | 0.015 | 4.1E-245 | 7 | 0.016844 |
| COL5A1   | 1.13E-47 | 0.368648 | 0.451 | 0.1   | 3.79E-43 | 7 | 0.102057 |
| COL5A2   | 1.8E-243 | 0.7469   | 0.535 | 0.032 | 6.2E-239 | 7 | 0.034576 |
| COMTD1   | 2.41E-57 | 0.293811 | 0.535 | 0.108 | 8.08E-53 | 7 | 0.109662 |
| COX14    | 1.77E-12 | 0.256533 | 0.746 | 0.474 | 5.95E-08 | 7 | 0.475569 |
| CRABP1   | 0.002636 | 0.555893 | 0.204 | 0.125 | 1        | 7 | 0.125262 |
| CRABP2   | 8.3E-147 | 1.108503 | 0.873 | 0.16  | 2.8E-142 | 7 | 0.163391 |
| CRNDE    | 1.47E-77 | 0.980733 | 0.838 | 0.27  | 4.94E-73 | 7 | 0.272378 |
| CROT     | 1.53E-22 | 0.275254 | 0.465 | 0.17  | 5.14E-18 | 7 | 0.171245 |
| CSRP1    | 3.4E-96  | 0.697605 | 0.5   | 0.069 | 1.14E-91 | 7 | 0.071177 |
| CTDSP1   | 1.62E-21 | 0.335077 | 0.704 | 0.354 | 5.45E-17 | 7 | 0.355496 |
| CTNNA1   | 5.01E-23 | 0.491931 | 0.803 | 0.51  | 1.68E-18 | 7 | 0.510998 |
| CTNNBIP1 | 1.07E-30 | 0.495626 | 0.859 | 0.523 | 3.59E-26 | 7 | 0.52475  |
| CXCL14   | 8.1E-279 | 4.308899 | 0.697 | 0.051 | 2.7E-274 | 7 | 0.054262 |
| CYB5A    | 1.85E-12 | 0.342608 | 0.732 | 0.498 | 6.21E-08 | 7 | 0.498738 |
| CYBA     | 6.15E-33 | 0.613561 | 0.662 | 0.289 | 2.06E-28 | 7 | 0.290572 |
| CYP1A1   | 0        | 0.29997  | 0.148 | 0     | 0        | 7 | 0.001102 |
| CYR61    | 0.001916 | 0.351355 | 0.423 | 0.331 | 1        | 7 | 0.331865 |
| DBI      | 5.89E-07 | 0.284158 | 0.958 | 0.946 | 0.019754 | 7 | 0.946448 |
| DCN      | 0        | 2.191146 | 0.69  | 0.014 | 0        | 7 | 0.017874 |
| DECR1    | 1.97E-14 | 0.322319 | 0.683 | 0.414 | 6.6E-10  | 7 | 0.415728 |
| DEGS1    | 7.34E-29 | 0.58165  | 0.831 | 0.506 | 2.46E-24 | 7 | 0.507587 |
| DLK2     | 1.39E-14 | 0.261982 | 0.366 | 0.143 | 4.65E-10 | 7 | 0.144096 |
| DLX5     | 4.4E-232 | 0.356914 | 0.345 | 0.013 | 1.5E-227 | 7 | 0.014854 |
| DMKN     | 7.8E-131 | 0.425188 | 0.423 | 0.035 | 2.6E-126 | 7 | 0.037206 |
| DNAJC15  | 1.1E-100 | 0.521415 | 0.627 | 0.098 | 3.62E-96 | 7 | 0.100494 |
| DSC2     | 0        | 0.807807 | 0.669 | 0.036 | 0        | 7 | 0.03948  |
| DSC3     | 0        | 0.554047 | 0.479 | 0.004 | 0        | 7 | 0.006645 |
| DSE      | 7.9E-39  | 0.263733 | 0.521 | 0.138 | 2.65E-34 | 7 | 0.14008  |
| DSG2     | 1.57E-54 | 0.394914 | 0.549 | 0.131 | 5.28E-50 | 7 | 0.132973 |

|         |          |          |       |       |          |   |          |
|---------|----------|----------|-------|-------|----------|---|----------|
| DSP     | 0        | 1.390033 | 0.824 | 0.018 | 0        | 7 | 0.022423 |
| DST     | 5.01E-45 | 0.961638 | 0.873 | 0.466 | 1.68E-40 | 7 | 0.468107 |
| DSTN    | 5.78E-16 | 0.299183 | 0.979 | 0.954 | 1.94E-11 | 7 | 0.95455  |
| DUSP14  | 2.95E-22 | 0.30692  | 0.669 | 0.309 | 9.89E-18 | 7 | 0.311041 |
| EBF3    | 2.16E-34 | 0.439425 | 0.239 | 0.04  | 7.26E-30 | 7 | 0.041257 |
| ECHDC2  | 7.8E-137 | 0.359069 | 0.458 | 0.04  | 2.6E-132 | 7 | 0.042287 |
| EDN1    | 0        | 0.297416 | 0.303 | 0.003 | 0        | 7 | 0.004264 |
| EFNA1   | 2.99E-58 | 0.357242 | 0.415 | 0.07  | 1E-53    | 7 | 0.07203  |
| EFNA5   | 1.07E-31 | 0.532621 | 0.521 | 0.163 | 3.57E-27 | 7 | 0.165168 |
| EGFR    | 5.2E-219 | 0.426096 | 0.5   | 0.031 | 1.8E-214 | 7 | 0.032977 |
| EIF2S3  | 9.8E-13  | 0.268766 | 0.873 | 0.679 | 3.29E-08 | 7 | 0.680324 |
| ELF1    | 9.04E-78 | 0.341181 | 0.493 | 0.077 | 3.03E-73 | 7 | 0.079173 |
| ENPP1   | 3.5E-108 | 0.43859  | 0.296 | 0.021 | 1.2E-103 | 7 | 0.022814 |
| ENSA    | 3.59E-09 | 0.250285 | 0.894 | 0.736 | 0.00012  | 7 | 0.73679  |
| EPCAM   | 0        | 1.385462 | 0.937 | 0.041 | 0        | 7 | 0.045592 |
| ESRP1   | 0        | 0.273903 | 0.38  | 0.001 | 0        | 7 | 0.002878 |
| ETS2    | 4.7E-159 | 0.38414  | 0.437 | 0.031 | 1.6E-154 | 7 | 0.033368 |
| EYA2    | 2.21E-43 | 0.396212 | 0.352 | 0.064 | 7.42E-39 | 7 | 0.065811 |
| F11R    | 1.7E-302 | 0.270302 | 0.373 | 0.012 | 5.8E-298 | 7 | 0.013539 |
| FABP3   | 3.46E-12 | 0.355475 | 0.127 | 0.029 | 1.16E-07 | 7 | 0.02985  |
| FAIM    | 1.25E-43 | 0.288344 | 0.38  | 0.075 | 4.19E-39 | 7 | 0.076472 |
| FAM210B | 9.97E-21 | 0.319284 | 0.704 | 0.368 | 3.34E-16 | 7 | 0.369603 |
| FAM213A | 3.14E-16 | 0.391778 | 0.972 | 0.775 | 1.05E-11 | 7 | 0.775736 |
| FAM3C   | 2.03E-20 | 0.425614 | 0.746 | 0.473 | 6.81E-16 | 7 | 0.473899 |
| FAM84A  | 8.6E-152 | 0.492031 | 0.5   | 0.043 | 2.9E-147 | 7 | 0.045414 |
| FBLIM1  | 4.99E-39 | 0.30132  | 0.507 | 0.135 | 1.67E-34 | 7 | 0.136776 |
| FBN2    | 2.15E-22 | 0.257878 | 0.408 | 0.134 | 7.2E-18  | 7 | 0.135496 |
| FCGRT   | 7.4E-120 | 0.389116 | 0.493 | 0.053 | 2.5E-115 | 7 | 0.055364 |
| FERMT1  | 0        | 0.502289 | 0.521 | 0.003 | 0        | 7 | 0.005792 |
| FEZF1   | 1.07E-31 | 0.276456 | 0.232 | 0.04  | 3.59E-27 | 7 | 0.040475 |
| FGFR2   | 3.2E-19  | 0.33812  | 0.535 | 0.243 | 1.07E-14 | 7 | 0.244803 |
| FILIP1L | 4.3E-112 | 0.496825 | 0.401 | 0.038 | 1.4E-107 | 7 | 0.039409 |
| FKBP9   | 1.84E-60 | 0.280336 | 0.444 | 0.076 | 6.18E-56 | 7 | 0.078107 |
| FLNA    | 5.75E-07 | 0.303424 | 0.627 | 0.505 | 0.019292 | 7 | 0.505526 |
| FLNB    | 7.82E-37 | 0.343121 | 0.528 | 0.156 | 2.62E-32 | 7 | 0.157919 |
| FN1     | 1.13E-20 | 0.356589 | 0.282 | 0.076 | 3.79E-16 | 7 | 0.076614 |
| FNDC5   | 5.32E-12 | 0.414961 | 0.408 | 0.192 | 1.78E-07 | 7 | 0.193419 |
| FRMD6   | 3.1E-35  | 0.311746 | 0.366 | 0.084 | 1.04E-30 | 7 | 0.08564  |
| FST     | 5.4E-258 | 1.676111 | 0.62  | 0.041 | 1.8E-253 | 7 | 0.04417  |
| FSTL1   | 1.78E-17 | 0.309079 | 0.535 | 0.248 | 5.99E-13 | 7 | 0.2496   |
| FSTL5   | 3.88E-07 | 0.827055 | 0.239 | 0.12  | 0.012996 | 7 | 0.120962 |
| FTH1    | 1.01E-53 | 0.606231 | 1     | 0.997 | 3.4E-49  | 7 | 0.997299 |
| FXD3    | 0        | 0.632414 | 0.542 | 0.001 | 0        | 7 | 0.003234 |
| GADD45B | 4.94E-62 | 0.330327 | 0.268 | 0.029 | 1.66E-57 | 7 | 0.03017  |
| GALNT3  | 0        | 0.288077 | 0.408 | 0.001 | 0        | 7 | 0.003518 |
| GATA3   | 0        | 0.465808 | 0.451 | 0.001 | 0        | 7 | 0.003234 |
| GIPC1   | 8.7E-16  | 0.419666 | 0.796 | 0.579 | 2.92E-11 | 7 | 0.57983  |
| GJA1    | 1.77E-84 | 0.500651 | 0.556 | 0.091 | 5.93E-80 | 7 | 0.093032 |

|          |          |          |       |       |          |   |          |
|----------|----------|----------|-------|-------|----------|---|----------|
| GJB2     | 0        | 0.807961 | 0.472 | 0.001 | 0        | 7 | 0.003198 |
| GJB6     | 0        | 0.963628 | 0.507 | 0     | 0        | 7 | 0.002843 |
| GLTP     | 1.63E-10 | 0.31329  | 0.676 | 0.471 | 5.46E-06 | 7 | 0.472407 |
| GNG8     | 4.61E-19 | 0.869946 | 0.254 | 0.074 | 1.55E-14 | 7 | 0.074553 |
| GNPTAB   | 3.5E-32  | 0.313144 | 0.627 | 0.211 | 1.17E-27 | 7 | 0.213177 |
| GOLGA4   | 3.89E-09 | 0.26828  | 0.768 | 0.606 | 0.00013  | 7 | 0.606801 |
| GPC3     | 8.46E-13 | 0.326465 | 0.514 | 0.276 | 2.84E-08 | 7 | 0.277495 |
| GRASP    | 7.11E-53 | 0.698736 | 0.268 | 0.034 | 2.38E-48 | 7 | 0.035571 |
| GSN      | 9.49E-20 | 0.41538  | 0.57  | 0.262 | 3.18E-15 | 7 | 0.263281 |
| GSTK1    | 7.77E-38 | 0.35386  | 0.641 | 0.211 | 2.61E-33 | 7 | 0.213319 |
| GSTO1    | 4.33E-33 | 0.635955 | 0.768 | 0.382 | 1.45E-28 | 7 | 0.383959 |
| GSTP1    | 5.48E-15 | 0.337813 | 0.972 | 0.986 | 1.84E-10 | 7 | 0.985964 |
| H3F3B    | 5.71E-25 | 0.404755 | 1     | 0.996 | 1.92E-20 | 7 | 0.995594 |
| HCFC1R1  | 9.42E-11 | 0.2627   | 0.711 | 0.439 | 3.16E-06 | 7 | 0.440176 |
| HEBP2    | 1.07E-30 | 0.493914 | 0.958 | 0.691 | 3.58E-26 | 7 | 0.692157 |
| HIC1     | 0        | 0.398643 | 0.408 | 0.006 | 0        | 7 | 0.008422 |
| HLA-E    | 1.11E-25 | 0.266944 | 0.479 | 0.161 | 3.73E-21 | 7 | 0.162325 |
| HOTAIRM1 | 0        | 0.768682 | 0.535 | 0.002 | 0        | 7 | 0.004442 |
| HSP90B1  | 2.75E-11 | 0.412739 | 0.937 | 0.863 | 9.21E-07 | 7 | 0.863473 |
| HSPA5    | 3.09E-19 | 0.465428 | 0.908 | 0.766 | 1.03E-14 | 7 | 0.766639 |
| HSPB1    | 7.24E-18 | 0.772567 | 0.768 | 0.614 | 2.43E-13 | 7 | 0.614584 |
| HSPG2    | 1.68E-29 | 0.251241 | 0.359 | 0.09  | 5.64E-25 | 7 | 0.091575 |
| ID1      | 1.74E-11 | 0.464766 | 0.69  | 0.47  | 5.82E-07 | 7 | 0.471128 |
| IER3     | 2.05E-16 | 0.457987 | 0.345 | 0.12  | 6.89E-12 | 7 | 0.120785 |
| IGF2.1   | 0        | 0.402404 | 0.359 | 0.002 | 0        | 7 | 0.004015 |
| IGFBP6   | 5.6E-303 | 0.900046 | 0.387 | 0.013 | 1.9E-298 | 7 | 0.014783 |
| IGFBP7   | 1.1E-100 | 0.381167 | 0.479 | 0.055 | 3.58E-96 | 7 | 0.057176 |
| IGFL2    | 0        | 0.984653 | 0.268 | 0.001 | 0        | 7 | 0.002452 |
| INPP1    | 2.73E-72 | 0.253307 | 0.352 | 0.042 | 9.17E-68 | 7 | 0.043602 |
| INSM1    | 7.79E-05 | 0.363179 | 0.254 | 0.147 | 1        | 7 | 0.147898 |
| IQGAP1   | 3.98E-16 | 0.289687 | 0.613 | 0.334 | 1.34E-11 | 7 | 0.33588  |
| IRF6     | 0        | 0.273154 | 0.338 | 0     | 0        | 7 | 0.002061 |
| IRX3     | 0        | 0.860518 | 0.606 | 0.004 | 0        | 7 | 0.006894 |
| IRX5     | 0        | 0.591592 | 0.521 | 0.006 | 0        | 7 | 0.008742 |
| ITGA6    | 1.21E-50 | 0.777847 | 0.655 | 0.219 | 4.05E-46 | 7 | 0.220852 |
| ITGAV    | 4.24E-39 | 0.336511 | 0.444 | 0.108 | 1.42E-34 | 7 | 0.110088 |
| ITGB1    | 2.47E-30 | 0.672487 | 0.901 | 0.648 | 8.28E-26 | 7 | 0.648911 |
| ITGB4    | 0        | 0.35439  | 0.394 | 0.006 | 0        | 7 | 0.00796  |
| ITGB5    | 0        | 0.542806 | 0.535 | 0.022 | 0        | 7 | 0.024733 |
| ITM2B    | 3.74E-23 | 0.401178 | 0.958 | 0.882 | 1.25E-18 | 7 | 0.882271 |
| JAG2     | 7.2E-159 | 0.379159 | 0.479 | 0.038 | 2.4E-154 | 7 | 0.039942 |
| JUNB     | 0.000378 | 0.2572   | 0.401 | 0.294 | 1        | 7 | 0.294197 |
| JUP      | 2.08E-60 | 0.523605 | 0.754 | 0.22  | 6.98E-56 | 7 | 0.222736 |
| KANK1    | 2.52E-80 | 0.29141  | 0.38  | 0.046 | 8.47E-76 | 7 | 0.047298 |
| KCNQ1OT1 | 2.02E-12 | 0.468054 | 0.754 | 0.467 | 6.76E-08 | 7 | 0.468356 |
| KDELR1   | 3.01E-13 | 0.267215 | 0.958 | 0.884 | 1.01E-08 | 7 | 0.884332 |
| KIF19    | 2.13E-15 | 0.254327 | 0.218 | 0.061 | 7.14E-11 | 7 | 0.062009 |
| KITLG    | 3.48E-69 | 0.299789 | 0.366 | 0.049 | 1.17E-64 | 7 | 0.050496 |

|          |          |          |       |       |          |   |          |
|----------|----------|----------|-------|-------|----------|---|----------|
| KLC3     | 0        | 0.632185 | 0.549 | 0.008 | 0        | 7 | 0.010518 |
| KLF5     | 3.1E-159 | 0.485383 | 0.437 | 0.032 | 1E-154   | 7 | 0.034149 |
| KLHL35   | 0.000175 | 0.361107 | 0.254 | 0.148 | 1        | 7 | 0.148182 |
| KREMEN1  | 2.71E-67 | 0.299481 | 0.43  | 0.066 | 9.1E-63  | 7 | 0.06773  |
| KREMEN2  | 0        | 1.818174 | 0.704 | 0.018 | 0        | 7 | 0.021854 |
| KRT15    | 0        | 2.446847 | 0.676 | 0.003 | 0        | 7 | 0.006823 |
| KRT17    | 0        | 3.647836 | 0.725 | 0.011 | 0        | 7 | 0.01496  |
| KRT18    | 3.5E-153 | 1.244753 | 0.831 | 0.127 | 1.2E-148 | 7 | 0.130308 |
| KRT19    | 0        | 3.02024  | 0.81  | 0.016 | 0        | 7 | 0.019616 |
| KRT23    | 0        | 0.289468 | 0.183 | 0.002 | 0        | 7 | 0.002452 |
| KRT5     | 0        | 2.165448 | 0.577 | 0.003 | 0        | 7 | 0.005686 |
| KRT8     | 0        | 1.844936 | 0.951 | 0.056 | 0        | 7 | 0.060019 |
| KTN1     | 1.65E-08 | 0.257746 | 0.866 | 0.793 | 0.000555 | 7 | 0.793113 |
| L1TD1    | 6.1E-157 | 0.282573 | 0.303 | 0.015 | 2E-152   | 7 | 0.016702 |
| LAD1     | 0        | 0.372006 | 0.352 | 0     | 0        | 7 | 0.001883 |
| LAMA5    | 1.1E-55  | 0.359874 | 0.507 | 0.107 | 3.69E-51 | 7 | 0.109022 |
| LAMB1    | 1.5E-144 | 0.466433 | 0.599 | 0.065 | 5.2E-140 | 7 | 0.067233 |
| LAMP1    | 1.24E-34 | 0.584605 | 0.81  | 0.438 | 4.17E-30 | 7 | 0.439537 |
| LARGE2   | 0        | 0.389603 | 0.401 | 0.005 | 0        | 7 | 0.006929 |
| LDHA     | 4.44E-07 | 0.407145 | 0.789 | 0.706 | 0.014893 | 7 | 0.706087 |
| LEPROT   | 2.78E-30 | 0.396677 | 0.775 | 0.356 | 9.33E-26 | 7 | 0.358232 |
| LGALS3   | 2.6E-162 | 0.514034 | 0.373 | 0.023 | 8.8E-158 | 7 | 0.024519 |
| LGR4     | 5.8E-176 | 0.28754  | 0.408 | 0.025 | 2E-171   | 7 | 0.026865 |
| LIMA1    | 1.28E-65 | 0.736413 | 0.725 | 0.213 | 4.3E-61  | 7 | 0.215131 |
| LITAF    | 6.98E-39 | 0.421986 | 0.577 | 0.184 | 2.34E-34 | 7 | 0.185601 |
| LMAN1    | 6.7E-22  | 0.376303 | 0.711 | 0.387 | 2.25E-17 | 7 | 0.388792 |
| LMNA     | 1.45E-46 | 0.788524 | 0.796 | 0.35  | 4.85E-42 | 7 | 0.352049 |
| LMO1     | 8.2E-190 | 0.276738 | 0.261 | 0.009 | 2.7E-185 | 7 | 0.010447 |
| LMO4     | 1.57E-24 | 0.378138 | 0.845 | 0.463 | 5.26E-20 | 7 | 0.465406 |
| LPP      | 2.59E-32 | 0.300227 | 0.465 | 0.132 | 8.67E-28 | 7 | 0.133862 |
| LRRC42   | 4.13E-06 | 0.323018 | 0.718 | 0.556 | 0.138428 | 7 | 0.556981 |
| LSR      | 1E-150   | 0.321398 | 0.479 | 0.04  | 3.4E-146 | 7 | 0.041754 |
| LURAP1L  | 1.7E-130 | 0.440214 | 0.458 | 0.042 | 5.6E-126 | 7 | 0.044348 |
| LY6E     | 5.15E-07 | 0.261786 | 0.704 | 0.519 | 0.017264 | 7 | 0.520237 |
| LYPD6B   | 2.3E-131 | 0.35993  | 0.479 | 0.045 | 7.6E-127 | 7 | 0.047333 |
| MAPK13   | 0        | 0.365581 | 0.415 | 0.01  | 0        | 7 | 0.011656 |
| MARVELD3 | 0        | 0.328051 | 0.458 | 0.009 | 0        | 7 | 0.011585 |
| MAST4    | 1.73E-47 | 0.303718 | 0.486 | 0.108 | 5.79E-43 | 7 | 0.110053 |
| MBP      | 0        | 0.303463 | 0.43  | 0.012 | 0        | 7 | 0.014534 |
| MDK      | 3.3E-27  | 0.834664 | 0.894 | 0.761 | 1.11E-22 | 7 | 0.761984 |
| MEST     | 3.17E-46 | 0.819194 | 0.768 | 0.281 | 1.06E-41 | 7 | 0.283359 |
| MSI2     | 1.96E-08 | 0.29608  | 0.704 | 0.481 | 0.000657 | 7 | 0.482321 |
| MT-ATP6  | 1.73E-24 | 0.310408 | 0.972 | 0.993 | 5.8E-20  | 7 | 0.993071 |
| MT-CO1   | 1.74E-34 | 0.350262 | 0.972 | 0.995 | 5.84E-30 | 7 | 0.994705 |
| MT-CO2   | 9.44E-28 | 0.297903 | 0.979 | 0.995 | 3.17E-23 | 7 | 0.994776 |
| MT-CYB   | 4.45E-32 | 0.374186 | 0.958 | 0.993 | 1.49E-27 | 7 | 0.993284 |
| MT-ND3   | 2.84E-19 | 0.311265 | 0.944 | 0.99  | 9.54E-15 | 7 | 0.989517 |
| MT-ND4   | 3.65E-33 | 0.347481 | 0.958 | 0.991 | 1.23E-28 | 7 | 0.990903 |

|         |          |          |       |       |          |   |          |
|---------|----------|----------|-------|-------|----------|---|----------|
| MT-ND5  | 2.1E-12  | 0.256457 | 0.951 | 0.964 | 7.06E-08 | 7 | 0.96418  |
| MT-ND6  | 1.06E-06 | 0.295989 | 0.711 | 0.589 | 0.035586 | 7 | 0.589887 |
| MT1F    | 4.8E-80  | 0.499145 | 0.324 | 0.034 | 1.61E-75 | 7 | 0.035749 |
| MT1X    | 1.89E-23 | 0.443799 | 0.479 | 0.182 | 6.33E-19 | 7 | 0.18386  |
| MYH9    | 2.06E-78 | 0.602535 | 0.683 | 0.153 | 6.9E-74  | 7 | 0.155432 |
| MYL12A  | 2.13E-58 | 0.922232 | 0.93  | 0.549 | 7.15E-54 | 7 | 0.551295 |
| MYL12B  | 9.42E-49 | 0.682277 | 0.993 | 0.922 | 3.16E-44 | 7 | 0.922675 |
| MYL6    | 5.23E-37 | 0.616823 | 1     | 0.989 | 1.76E-32 | 7 | 0.989553 |
| MYL9    | 2.09E-39 | 0.319563 | 0.225 | 0.031 | 7E-35    | 7 | 0.032124 |
| MYO6    | 3.81E-17 | 0.339373 | 0.782 | 0.456 | 1.28E-12 | 7 | 0.457944 |
| NAGK    | 6.02E-14 | 0.281116 | 0.662 | 0.378 | 2.02E-09 | 7 | 0.379837 |
| NAV2    | 1.82E-73 | 0.565838 | 0.669 | 0.155 | 6.09E-69 | 7 | 0.15799  |
| NDFIP2  | 2.35E-53 | 0.33674  | 0.556 | 0.127 | 7.89E-49 | 7 | 0.129597 |
| NEAT1   | 2.58E-21 | 0.50341  | 0.542 | 0.225 | 8.65E-17 | 7 | 0.226182 |
| NECTIN1 | 2.37E-36 | 0.284856 | 0.5   | 0.138 | 7.95E-32 | 7 | 0.139796 |
| NECTIN2 | 4.74E-24 | 0.361631 | 0.732 | 0.379 | 1.59E-19 | 7 | 0.380583 |
| NFE2L2  | 6.39E-11 | 0.27423  | 0.669 | 0.432 | 2.14E-06 | 7 | 0.433069 |
| NFKBIA  | 1.12E-15 | 0.604182 | 0.634 | 0.391 | 3.77E-11 | 7 | 0.391848 |
| NPC2    | 4.23E-14 | 0.403403 | 0.761 | 0.592 | 1.42E-09 | 7 | 0.593049 |
| NR3C1   | 9.8E-122 | 0.374487 | 0.507 | 0.055 | 3.3E-117 | 7 | 0.056999 |
| NTF4    | 0        | 0.310328 | 0.373 | 0.01  | 0        | 7 | 0.011762 |
| OCIAD2  | 3.95E-19 | 0.417703 | 0.894 | 0.639 | 1.32E-14 | 7 | 0.640205 |
| OLFM2   | 1.92E-39 | 0.614382 | 0.838 | 0.385 | 6.43E-35 | 7 | 0.387335 |
| OPTN    | 1.63E-43 | 0.460496 | 0.746 | 0.262 | 5.48E-39 | 7 | 0.264241 |
| ORAI3   | 8.39E-26 | 0.260986 | 0.43  | 0.13  | 2.81E-21 | 7 | 0.131587 |
| OSBPL1A | 1.06E-28 | 0.475946 | 0.711 | 0.332 | 3.56E-24 | 7 | 0.33421  |
| P4HA2   | 6E-160   | 0.513358 | 0.507 | 0.043 | 2E-155   | 7 | 0.045627 |
| PAPSS1  | 1.6E-06  | 0.263838 | 0.761 | 0.547 | 0.053557 | 7 | 0.548133 |
| PAWR    | 9.53E-21 | 0.375031 | 0.803 | 0.488 | 3.2E-16  | 7 | 0.489251 |
| PDE4D   | 4.05E-39 | 0.299716 | 0.401 | 0.088 | 1.36E-34 | 7 | 0.089371 |
| PDGFA   | 7.4E-244 | 0.803967 | 0.627 | 0.045 | 2.5E-239 | 7 | 0.047866 |
| PDGFC   | 2.19E-27 | 0.425498 | 0.507 | 0.182 | 7.34E-23 | 7 | 0.183327 |
| PDGFD   | 5.68E-35 | 0.284018 | 0.366 | 0.083 | 1.9E-30  | 7 | 0.084148 |
| PDIA4   | 2.11E-19 | 0.378278 | 0.718 | 0.407 | 7.06E-15 | 7 | 0.408266 |
| PDLIM1  | 3.01E-40 | 0.757602 | 0.81  | 0.444 | 1.01E-35 | 7 | 0.446324 |
| PDLIM4  | 3.41E-41 | 0.600135 | 0.634 | 0.236 | 1.14E-36 | 7 | 0.238264 |
| PERP    | 0        | 1.508872 | 0.887 | 0.046 | 0        | 7 | 0.050709 |
| PKP3    | 0        | 0.642405 | 0.634 | 0.001 | 0        | 7 | 0.003767 |
| PLAU    | 0        | 0.519504 | 0.408 | 0.009 | 0        | 7 | 0.0113   |
| PLD3    | 1.2E-11  | 0.267111 | 0.887 | 0.729 | 4.01E-07 | 7 | 0.729967 |
| PLEKHA1 | 2.11E-16 | 0.299252 | 0.648 | 0.348 | 7.07E-12 | 7 | 0.349561 |
| PLK2    | 3.57E-38 | 0.491638 | 0.563 | 0.163 | 1.2E-33  | 7 | 0.165062 |
| PLP2    | 1.35E-52 | 0.663683 | 0.775 | 0.282 | 4.52E-48 | 7 | 0.284212 |
| PMAIP1  | 2.05E-25 | 0.40226  | 0.521 | 0.191 | 6.88E-21 | 7 | 0.192566 |
| PNRC1   | 1.04E-20 | 0.477639 | 0.908 | 0.679 | 3.48E-16 | 7 | 0.680182 |
| POLR1D  | 2.74E-28 | 0.508681 | 0.958 | 0.873 | 9.21E-24 | 7 | 0.873885 |
| POLR2L  | 6.04E-12 | 0.329135 | 0.965 | 0.918 | 2.02E-07 | 7 | 0.918446 |
| POU3F1  | 3.35E-78 | 0.273954 | 0.38  | 0.045 | 1.12E-73 | 7 | 0.046836 |



|          |          |          |       |       |          |   |          |
|----------|----------|----------|-------|-------|----------|---|----------|
| PPCS     | 2.08E-14 | 0.258121 | 0.662 | 0.392 | 6.99E-10 | 7 | 0.393554 |
| PPDPF    | 8.71E-38 | 0.516099 | 0.993 | 0.958 | 2.92E-33 | 7 | 0.958601 |
| PPFIBP1  | 3.38E-24 | 0.444806 | 0.563 | 0.243 | 1.13E-19 | 7 | 0.244128 |
| PPL      | 6.4E-188 | 0.303335 | 0.38  | 0.02  | 2.1E-183 | 7 | 0.021996 |
| PPP1R14A | 3.38E-48 | 0.402742 | 0.401 | 0.076 | 1.13E-43 | 7 | 0.078    |
| PPP1R17  | 9.38E-14 | 0.605999 | 0.162 | 0.042 | 3.15E-09 | 7 | 0.042287 |
| PPP1R3B  | 0        | 0.370388 | 0.373 | 0.011 | 0        | 7 | 0.01297  |
| PRKX     | 2.35E-16 | 0.394368 | 0.683 | 0.398 | 7.88E-12 | 7 | 0.398955 |
| PRPH     | 1.18E-93 | 0.599032 | 0.141 | 0.006 | 3.95E-89 | 7 | 0.006219 |
| PRRG4    | 0        | 0.427277 | 0.43  | 0.001 | 0        | 7 | 0.003092 |
| PRSS23   | 4.14E-51 | 1.07194  | 0.549 | 0.147 | 1.39E-46 | 7 | 0.148893 |
| PRSS8    | 0        | 0.35607  | 0.394 | 0.003 | 0        | 7 | 0.004762 |
| PTPMT1   | 1.77E-33 | 0.381363 | 0.613 | 0.222 | 5.92E-29 | 7 | 0.223517 |
| PTPN14   | 5.8E-156 | 0.43123  | 0.43  | 0.032 | 1.9E-151 | 7 | 0.033688 |
| PTPRF    | 3.72E-28 | 0.448202 | 0.782 | 0.438 | 1.25E-23 | 7 | 0.44007  |
| QPRT     | 4.99E-76 | 0.789927 | 0.655 | 0.15  | 1.67E-71 | 7 | 0.15298  |
| RAB11A   | 3.31E-09 | 0.253117 | 0.923 | 0.765 | 0.000111 | 7 | 0.765716 |
| RAB13    | 6.48E-13 | 0.368484 | 0.796 | 0.599 | 2.17E-08 | 7 | 0.600085 |
| RAB25    | 0        | 1.007195 | 0.859 | 0.002 | 0        | 7 | 0.006396 |
| RAB32    | 1.12E-50 | 0.434543 | 0.423 | 0.083 | 3.74E-46 | 7 | 0.084965 |
| RAB34    | 1.2E-22  | 0.471366 | 0.62  | 0.319 | 4.03E-18 | 7 | 0.320635 |
| RAB38    | 8.61E-44 | 0.277686 | 0.415 | 0.086 | 2.89E-39 | 7 | 0.087808 |
| RALBP1   | 3.18E-38 | 0.617686 | 0.887 | 0.542 | 1.07E-33 | 7 | 0.543904 |
| RBMS1    | 6.6E-161 | 0.546387 | 0.655 | 0.07  | 2.2E-156 | 7 | 0.073132 |
| RBP1     | 2.11E-08 | 0.657265 | 0.373 | 0.202 | 0.000709 | 7 | 0.202658 |
| REEP5    | 3.08E-14 | 0.278604 | 0.782 | 0.487 | 1.03E-09 | 7 | 0.488575 |
| RETREG1  | 1.39E-40 | 0.498132 | 0.641 | 0.219 | 4.66E-36 | 7 | 0.22135  |
| REXO2    | 5.09E-11 | 0.271425 | 0.585 | 0.374 | 1.71E-06 | 7 | 0.37536  |
| RGMB     | 5.7E-25  | 0.31813  | 0.479 | 0.158 | 1.91E-20 | 7 | 0.159696 |
| RHOC     | 5.35E-25 | 0.486444 | 0.768 | 0.433 | 1.79E-20 | 7 | 0.434953 |
| RHOD     | 7.8E-159 | 0.326772 | 0.394 | 0.026 | 2.6E-154 | 7 | 0.027682 |
| RHOV     | 2.19E-31 | 0.309387 | 0.211 | 0.034 | 7.36E-27 | 7 | 0.034967 |
| RNF19A   | 6.71E-18 | 0.253731 | 0.535 | 0.23  | 2.25E-13 | 7 | 0.231335 |
| RNF43    | 1.91E-83 | 0.257321 | 0.359 | 0.039 | 6.39E-79 | 7 | 0.040404 |
| RNPEP    | 9.67E-13 | 0.251622 | 0.634 | 0.356 | 3.24E-08 | 7 | 0.357414 |
| ROGDI    | 2.31E-14 | 0.290839 | 0.676 | 0.375 | 7.76E-10 | 7 | 0.376604 |
| RPL12    | 2.44E-11 | 0.261817 | 1     | 0.996 | 8.17E-07 | 7 | 0.99634  |
| RPL26    | 3.16E-15 | 0.277675 | 1     | 0.998 | 1.06E-10 | 7 | 0.997584 |
| RPL36AL  | 6.3E-22  | 0.345813 | 1     | 0.964 | 2.11E-17 | 7 | 0.963932 |
| RPLP1    | 5.09E-12 | 0.26139  | 1     | 0.999 | 1.71E-07 | 7 | 0.998969 |
| RPRM     | 1.05E-10 | 0.843792 | 0.289 | 0.132 | 3.53E-06 | 7 | 0.132618 |
| RPS12    | 1.56E-12 | 0.256824 | 1     | 0.998 | 5.23E-08 | 7 | 0.998436 |
| RPS18    | 4.55E-13 | 0.281298 | 1     | 0.999 | 1.53E-08 | 7 | 0.999041 |
| RRAS     | 2.47E-88 | 0.586964 | 0.662 | 0.13  | 8.27E-84 | 7 | 0.132405 |
| RRBP1    | 3.76E-27 | 0.33864  | 0.585 | 0.228 | 1.26E-22 | 7 | 0.229772 |
| RTP1     | 2.38E-06 | 0.259495 | 0.148 | 0.059 | 0.079835 | 7 | 0.059415 |
| RYK      | 9E-10    | 0.257216 | 0.669 | 0.47  | 3.02E-05 | 7 | 0.471412 |
| S100A10  | 0        | 2.174819 | 0.817 | 0.054 | 0        | 7 | 0.058171 |



|          |          |          |       |       |          |   |          |
|----------|----------|----------|-------|-------|----------|---|----------|
| S100A11  | 0        | 3.099307 | 0.81  | 0.031 | 0        | 7 | 0.03518  |
| S100A13  | 7.21E-22 | 0.340791 | 0.493 | 0.196 | 2.42E-17 | 7 | 0.197292 |
| S100A14  | 0        | 1.273279 | 0.592 | 0     | 0        | 7 | 0.003411 |
| S100A16  | 0        | 1.184279 | 0.69  | 0.037 | 0        | 7 | 0.040084 |
| S100A6   | 6.87E-23 | 0.992532 | 0.324 | 0.092 | 2.31E-18 | 7 | 0.092783 |
| SAT1     | 2.25E-09 | 0.726629 | 0.62  | 0.436 | 7.56E-05 | 7 | 0.436907 |
| SDC1     | 3.71E-34 | 0.321293 | 0.43  | 0.113 | 1.24E-29 | 7 | 0.114353 |
| SELENOP  | 6.57E-14 | 0.25235  | 0.338 | 0.128 | 2.2E-09  | 7 | 0.128745 |
| SELENOW  | 1.08E-10 | 0.272836 | 0.979 | 0.878 | 3.63E-06 | 7 | 0.878149 |
| SEMA3A   | 1.04E-64 | 0.504116 | 0.577 | 0.124 | 3.49E-60 | 7 | 0.125795 |
| SEMA3D   | 0        | 1.070291 | 0.627 | 0.015 | 0        | 7 | 0.018159 |
| SEMA3F   | 2.3E-114 | 0.266023 | 0.345 | 0.027 | 7.7E-110 | 7 | 0.028322 |
| SEMA6A   | 5.91E-09 | 0.321397 | 0.634 | 0.433 | 0.000198 | 7 | 0.433709 |
| SERF2    | 2.42E-16 | 0.250856 | 1     | 0.987 | 8.11E-12 | 7 | 0.986923 |
| SERINC2  | 4.74E-06 | 0.291688 | 0.754 | 0.566 | 0.159003 | 7 | 0.56686  |
| SERPINF1 | 7.3E-166 | 0.556599 | 0.556 | 0.049 | 2.4E-161 | 7 | 0.051349 |
| SERPINH1 | 2.79E-27 | 0.395819 | 0.535 | 0.202 | 9.36E-23 | 7 | 0.203191 |
| SFN      | 0        | 1.528541 | 0.641 | 0.003 | 0        | 7 | 0.006183 |
| SH3BP5   | 2.91E-22 | 0.347468 | 0.655 | 0.271 | 9.77E-18 | 7 | 0.272947 |
| SH3PXD2A | 3.46E-31 | 0.287851 | 0.472 | 0.139 | 1.16E-26 | 7 | 0.14104  |
| SH3YL1   | 1.19E-14 | 0.318532 | 0.514 | 0.264 | 3.98E-10 | 7 | 0.265058 |
| SIX1     | 0        | 0.501844 | 0.204 | 0.003 | 0        | 7 | 0.003731 |
| SKAP2    | 0        | 0.587519 | 0.556 | 0.019 | 0        | 7 | 0.021961 |
| SLC1A3   | 3.09E-18 | 0.394411 | 0.528 | 0.253 | 1.04E-13 | 7 | 0.254078 |
| SLC38A10 | 1.61E-21 | 0.268816 | 0.451 | 0.159 | 5.39E-17 | 7 | 0.160122 |
| SLC40A1  | 1.53E-55 | 0.254745 | 0.232 | 0.025 | 5.12E-51 | 7 | 0.025657 |
| SMAGP    | 1.9E-186 | 0.294098 | 0.366 | 0.019 | 6.5E-182 | 7 | 0.020682 |
| SMARCD2  | 1.99E-49 | 0.300308 | 0.479 | 0.103 | 6.66E-45 | 7 | 0.104936 |
| SNCA     | 3.73E-08 | 0.338524 | 0.563 | 0.342 | 0.00125  | 7 | 0.34288  |
| SNCG     | 8.46E-62 | 0.461438 | 0.458 | 0.08  | 2.84E-57 | 7 | 0.0823   |
| SNHG18   | 1.41E-81 | 0.253375 | 0.345 | 0.037 | 4.74E-77 | 7 | 0.038058 |
| SNHG7    | 6.84E-11 | 0.299343 | 0.901 | 0.734 | 2.29E-06 | 7 | 0.734729 |
| SNHG8    | 2.84E-23 | 0.537939 | 0.866 | 0.607 | 9.52E-19 | 7 | 0.608187 |
| SOCS1    | 6.1E-128 | 0.361928 | 0.359 | 0.026 | 2E-123   | 7 | 0.028073 |
| SPARC    | 2.45E-21 | 0.706062 | 0.725 | 0.499 | 8.21E-17 | 7 | 0.500586 |
| SPATS2L  | 4.97E-23 | 0.396042 | 0.648 | 0.321 | 1.67E-18 | 7 | 0.32227  |
| SPINT1   | 0        | 0.833549 | 0.761 | 0.004 | 0        | 7 | 0.00732  |
| SPINT2   | 6.59E-96 | 1.288593 | 0.972 | 0.391 | 2.21E-91 | 7 | 0.394229 |
| SPOCK1   | 5.78E-21 | 0.32154  | 0.5   | 0.198 | 1.94E-16 | 7 | 0.19946  |
| SPOCK2   | 1.46E-37 | 0.327514 | 0.232 | 0.035 | 4.88E-33 | 7 | 0.036139 |
| STAP2    | 7.3E-220 | 0.383913 | 0.437 | 0.023 | 2.5E-215 | 7 | 0.025123 |
| STARD10  | 4.19E-34 | 0.499786 | 0.739 | 0.332 | 1.4E-29  | 7 | 0.33389  |
| SULT1E1  | 0        | 1.08858  | 0.606 | 0.002 | 0        | 7 | 0.005508 |
| SVIL     | 4.3E-30  | 0.897567 | 0.718 | 0.454 | 1.44E-25 | 7 | 0.455812 |
| SYNPO2   | 0        | 0.317042 | 0.373 | 0.002 | 0        | 7 | 0.003873 |
| SYTL1    | 0        | 0.310425 | 0.352 | 0.009 | 0        | 7 | 0.010234 |
| TAGLN    | 2.6E-150 | 1.746492 | 0.5   | 0.045 | 8.8E-146 | 7 | 0.047155 |
| TAGLN2   | 1.23E-10 | 0.40359  | 0.5   | 0.276 | 4.13E-06 | 7 | 0.276749 |

|           |          |          |       |       |          |   |          |
|-----------|----------|----------|-------|-------|----------|---|----------|
| TCEAL9    | 2.35E-11 | 0.394265 | 0.88  | 0.76  | 7.88E-07 | 7 | 0.760741 |
| TDRP      | 9.83E-60 | 0.367982 | 0.5   | 0.099 | 3.3E-55  | 7 | 0.101276 |
| TES       | 2.6E-307 | 0.359172 | 0.444 | 0.017 | 8.8E-303 | 7 | 0.018834 |
| TFAP2A    | 0        | 0.700112 | 0.585 | 0.004 | 0        | 7 | 0.006467 |
| TFAP2B    | 0        | 1.231015 | 0.669 | 0.001 | 0        | 7 | 0.004051 |
| TGIF1     | 3.65E-08 | 0.27315  | 0.676 | 0.468 | 0.001225 | 7 | 0.46928  |
| TINCR     | 0        | 0.479958 | 0.451 | 0.007 | 0        | 7 | 0.00899  |
| TLE2      | 3.37E-75 | 0.387888 | 0.549 | 0.095 | 1.13E-70 | 7 | 0.097225 |
| TM7SF2    | 1.06E-07 | 0.255255 | 0.852 | 0.72  | 0.00354  | 7 | 0.72023  |
| TMED10    | 1.18E-18 | 0.34992  | 0.887 | 0.619 | 3.96E-14 | 7 | 0.620625 |
| TMEFF2    | 1.63E-58 | 1.13173  | 0.655 | 0.187 | 5.48E-54 | 7 | 0.18887  |
| TMEM141   | 9.3E-23  | 0.366541 | 0.768 | 0.422 | 3.12E-18 | 7 | 0.42351  |
| TMEM256   | 2.2E-10  | 0.266609 | 0.845 | 0.638 | 7.38E-06 | 7 | 0.638641 |
| TMEM40    | 0        | 0.448631 | 0.338 | 0     | 0        | 7 | 0.001848 |
| TMEM54    | 3E-228   | 0.549501 | 0.507 | 0.03  | 1E-223   | 7 | 0.032728 |
| TMEM59    | 1.7E-11  | 0.29835  | 0.923 | 0.823 | 5.71E-07 | 7 | 0.823318 |
| TMSB10    | 1.08E-08 | 0.271811 | 1     | 0.998 | 0.000361 | 7 | 0.998472 |
| TNFRSF12A | 2.03E-66 | 0.582383 | 0.472 | 0.082 | 6.82E-62 | 7 | 0.084325 |
| TNFRSF19  | 1.04E-82 | 0.783378 | 0.634 | 0.134 | 3.47E-78 | 7 | 0.136776 |
| TNNT1     | 1.4E-108 | 0.669769 | 0.57  | 0.079 | 4.7E-104 | 7 | 0.081021 |
| TP53I3    | 5.15E-21 | 0.285941 | 0.5   | 0.194 | 1.73E-16 | 7 | 0.1958   |
| TP53TG1   | 1.39E-28 | 0.463565 | 0.62  | 0.27  | 4.66E-24 | 7 | 0.271419 |
| TP63      | 0        | 0.383164 | 0.394 | 0     | 0        | 7 | 0.002239 |
| TPD52     | 8.9E-23  | 0.303469 | 0.451 | 0.162 | 2.99E-18 | 7 | 0.16332  |
| TPM1      | 2.84E-44 | 0.934113 | 0.993 | 0.777 | 9.52E-40 | 7 | 0.778046 |
| TPM2      | 8.64E-59 | 0.555414 | 0.373 | 0.056 | 2.9E-54  | 7 | 0.057994 |
| TPM4      | 1.83E-05 | 0.282937 | 0.81  | 0.725 | 0.612545 | 7 | 0.725241 |
| TPT1      | 4.68E-28 | 0.426568 | 1     | 0.998 | 1.57E-23 | 7 | 0.997903 |
| TRAPPC3   | 2.11E-12 | 0.304082 | 0.852 | 0.606 | 7.09E-08 | 7 | 0.607441 |
| TRIM29    | 0        | 0.272045 | 0.352 | 0     | 0        | 7 | 0.002061 |
| TSTD1     | 3.1E-302 | 1.217619 | 0.937 | 0.087 | 1E-297   | 7 | 0.091255 |
| TUBA1C    | 1.51E-65 | 0.612393 | 0.599 | 0.125 | 5.08E-61 | 7 | 0.127465 |
| TUBA4A    | 1.8E-174 | 0.37395  | 0.239 | 0.008 | 6.1E-170 | 7 | 0.00963  |
| TXNDC17   | 9.25E-12 | 0.263942 | 0.951 | 0.808 | 3.1E-07  | 7 | 0.808536 |
| UBE2E3    | 7.62E-19 | 0.436131 | 0.958 | 0.886 | 2.55E-14 | 7 | 0.886394 |
| UNCX      | 2.99E-40 | 0.840829 | 0.268 | 0.043 | 1E-35    | 7 | 0.04449  |
| VAMP8     | 0        | 0.793427 | 0.676 | 0.009 | 0        | 7 | 0.012722 |
| VASP      | 5.06E-35 | 0.368472 | 0.599 | 0.201 | 1.7E-30  | 7 | 0.203049 |
| VCL       | 3.82E-21 | 0.36487  | 0.556 | 0.246 | 1.28E-16 | 7 | 0.247681 |
| VGLL4     | 1.37E-14 | 0.361811 | 0.817 | 0.622 | 4.59E-10 | 7 | 0.623077 |
| WASF2     | 9.19E-35 | 0.588739 | 0.817 | 0.48  | 3.08E-30 | 7 | 0.481326 |
| WDR1      | 1.91E-10 | 0.256552 | 0.655 | 0.42  | 6.42E-06 | 7 | 0.421129 |
| WFDC2     | 2E-150   | 0.580401 | 0.401 | 0.029 | 6.8E-146 | 7 | 0.030418 |
| WLS       | 1.94E-25 | 0.26761  | 0.62  | 0.248 | 6.5E-21  | 7 | 0.249991 |
| WNT10A    | 0        | 0.584525 | 0.472 | 0.003 | 0        | 7 | 0.005757 |
| WNT3      | 1.8E-159 | 0.42404  | 0.444 | 0.033 | 5.9E-155 | 7 | 0.034931 |
| WNT4      | 9.2E-249 | 0.436112 | 0.437 | 0.02  | 3.1E-244 | 7 | 0.022139 |
| WNT6      | 0        | 1.699532 | 0.676 | 0.001 | 0        | 7 | 0.004762 |

|           |          |          |       |       |          |   |          |
|-----------|----------|----------|-------|-------|----------|---|----------|
| YBX3      | 1.26E-16 | 0.492074 | 0.796 | 0.582 | 4.23E-12 | 7 | 0.58317  |
| ZFAS1     | 3.02E-12 | 0.279241 | 1     | 0.978 | 1.01E-07 | 7 | 0.978537 |
| ZFH3      | 5.15E-18 | 0.257478 | 0.599 | 0.284 | 1.73E-13 | 7 | 0.285882 |
| ZFP36L2   | 4.87E-07 | 0.330685 | 0.627 | 0.5   | 0.016328 | 7 | 0.500657 |
| ZNF385A   | 1.87E-36 | 0.398055 | 0.592 | 0.2   | 6.28E-32 | 7 | 0.201805 |
| ZNF703    | 2.87E-46 | 0.459628 | 0.57  | 0.158 | 9.64E-42 | 7 | 0.159945 |
| ZNRF3     | 2.38E-15 | 0.382288 | 0.521 | 0.274 | 7.99E-11 | 7 | 0.275221 |
| SEPT6     | 3.91E-28 | 0.840057 | 0.926 | 0.351 | 1.31E-23 | 8 | 0.352475 |
| SEPT11    | 2.28E-31 | 1.008867 | 1     | 0.893 | 7.65E-27 | 8 | 0.893358 |
| A1BG      | 8.53E-22 | 0.625484 | 0.944 | 0.498 | 2.86E-17 | 8 | 0.499129 |
| A2M       | 0        | 0.419084 | 0.556 | 0.006 | 0        | 8 | 0.007356 |
| AAMDC     | 1.26E-09 | 0.279022 | 0.889 | 0.485 | 4.24E-05 | 8 | 0.485626 |
| ABCA9     | 0        | 0.259793 | 0.389 | 0     | 0        | 8 | 0.000995 |
| AC092958. | 5.9E-266 | 0.283681 | 0.5   | 0.01  | 2E-261   | 8 | 0.010767 |
| AC100810. | 3.54E-12 | 0.302038 | 0.741 | 0.298 | 1.19E-07 | 8 | 0.299314 |
| ACADVL    | 5.36E-09 | 0.313363 | 0.833 | 0.462 | 0.00018  | 8 | 0.463061 |
| ACBD3     | 1.85E-11 | 0.335684 | 0.907 | 0.502 | 6.2E-07  | 8 | 0.502718 |
| ACTA2     | 6.8E-190 | 1.691466 | 0.741 | 0.032 | 2.3E-185 | 8 | 0.033474 |
| ACTG2     | 0        | 1.257794 | 0.796 | 0.003 | 0        | 8 | 0.004904 |
| ACTN1     | 3.62E-16 | 0.511064 | 0.815 | 0.36  | 1.21E-11 | 8 | 0.360613 |
| ACTR2     | 1.93E-08 | 0.319547 | 0.944 | 0.639 | 0.000647 | 8 | 0.639743 |
| ADA       | 1.5E-12  | 0.255517 | 0.63  | 0.222 | 5.01E-08 | 8 | 0.222522 |
| ADAM12    | 1.7E-178 | 0.575522 | 0.63  | 0.024 | 5.6E-174 | 8 | 0.025195 |
| ADD3      | 8.28E-41 | 1.081608 | 0.944 | 0.302 | 2.78E-36 | 8 | 0.303507 |
| ADGRA2    | 0        | 0.445889 | 0.667 | 0.004 | 0        | 8 | 0.00533  |
| AEBP1     | 2.06E-58 | 0.499163 | 0.759 | 0.102 | 6.9E-54  | 8 | 0.103728 |
| AFAP1L2   | 0        | 0.406344 | 0.667 | 0.009 | 0        | 8 | 0.010732 |
| AHNAK     | 9.11E-42 | 0.895927 | 0.889 | 0.234 | 3.05E-37 | 8 | 0.234782 |
| AKAP12    | 2.95E-29 | 1.581846 | 0.981 | 0.602 | 9.9E-25  | 8 | 0.602857 |
| AL031058. | 0        | 0.964675 | 0.741 | 0.005 | 0        | 8 | 0.006361 |
| AL355338. | 1.62E-14 | 0.269818 | 0.685 | 0.221 | 5.42E-10 | 8 | 0.222025 |
| AL359555. | 0        | 0.29624  | 0.463 | 0     | 0        | 8 | 0.000924 |
| ALCAM     | 2.7E-137 | 0.551805 | 0.685 | 0.037 | 9.2E-133 | 8 | 0.037774 |
| ALDH1L2   | 1.1E-154 | 0.511496 | 0.741 | 0.038 | 3.7E-150 | 8 | 0.039693 |
| AMOTL1    | 7.16E-56 | 0.984859 | 0.981 | 0.224 | 2.4E-51  | 8 | 0.225827 |
| ANKRD11   | 6.23E-11 | 0.429096 | 0.963 | 0.879 | 2.09E-06 | 8 | 0.879038 |
| ANTXR2    | 4.15E-58 | 0.657638 | 0.778 | 0.116 | 1.39E-53 | 8 | 0.11716  |
| ANXA1     | 6E-305   | 1.944691 | 0.963 | 0.035 | 2E-300   | 8 | 0.036353 |
| ANXA2     | 1.37E-76 | 2.184079 | 1     | 0.181 | 4.61E-72 | 8 | 0.1829   |
| ANXA5     | 2.45E-30 | 1.084379 | 1     | 0.727 | 8.22E-26 | 8 | 0.727764 |
| ANXA6     | 1.05E-24 | 0.628738 | 0.944 | 0.39  | 3.51E-20 | 8 | 0.390889 |
| AP2S1     | 3.77E-27 | 0.742743 | 1     | 0.934 | 1.26E-22 | 8 | 0.934082 |
| AP3S1     | 3.06E-11 | 0.346272 | 0.926 | 0.617 | 1.03E-06 | 8 | 0.617711 |
| APCDD1    | 2.83E-38 | 0.914078 | 0.833 | 0.192 | 9.49E-34 | 8 | 0.192921 |
| APOE      | 8.2E-195 | 2.718425 | 0.963 | 0.055 | 2.7E-190 | 8 | 0.056892 |
| ARCN1     | 5.97E-15 | 0.401057 | 0.815 | 0.351 | 2E-10    | 8 | 0.351729 |
| ARF1      | 1.84E-08 | 0.33952  | 0.944 | 0.878 | 0.000618 | 8 | 0.87854  |
| ARF4      | 7.71E-25 | 0.756345 | 0.981 | 0.761 | 2.59E-20 | 8 | 0.761736 |

|           |          |          |       |       |          |   |          |
|-----------|----------|----------|-------|-------|----------|---|----------|
| ARHGAP29  | 0        | 1.63293  | 0.944 | 0.027 | 0        | 8 | 0.028855 |
| ARHGAP31  | 3.4E-229 | 0.276526 | 0.463 | 0.01  | 1.1E-224 | 8 | 0.010696 |
| ARHGDIA   | 2.83E-06 | 0.279121 | 0.889 | 0.686 | 0.095013 | 8 | 0.686685 |
| ARHGEF40  | 2.02E-24 | 0.453857 | 0.852 | 0.279 | 6.76E-20 | 8 | 0.280196 |
| ARID3A    | 1.57E-13 | 0.262172 | 0.648 | 0.217 | 5.27E-09 | 8 | 0.218223 |
| ARL1      | 2.34E-13 | 0.382588 | 0.87  | 0.452 | 7.84E-09 | 8 | 0.453253 |
| ARL4A     | 8.47E-58 | 1.365522 | 0.963 | 0.218 | 2.84E-53 | 8 | 0.219466 |
| ARL6IP4   | 4.85E-11 | 0.358512 | 1     | 0.864 | 1.63E-06 | 8 | 0.864539 |
| ARMCX2    | 3.59E-16 | 0.34141  | 0.722 | 0.245 | 1.2E-11  | 8 | 0.246189 |
| ARMCX3    | 3.69E-10 | 0.305586 | 0.907 | 0.568 | 1.24E-05 | 8 | 0.568672 |
| ARPC1B    | 1.92E-39 | 0.425611 | 0.722 | 0.126 | 6.44E-35 | 8 | 0.127536 |
| ARPC2     | 1.44E-26 | 0.730127 | 1     | 0.951 | 4.82E-22 | 8 | 0.951246 |
| ARSG      | 3.36E-39 | 0.304617 | 0.481 | 0.058 | 1.13E-34 | 8 | 0.058704 |
| ASNS      | 3.24E-20 | 0.565834 | 0.796 | 0.301 | 1.09E-15 | 8 | 0.301979 |
| ASPN      | 0        | 0.633736 | 0.685 | 0.001 | 0        | 8 | 0.001919 |
| ASS1      | 4E-246   | 0.667984 | 0.63  | 0.017 | 1.3E-241 | 8 | 0.018514 |
| ATF4      | 8.66E-18 | 0.547218 | 0.963 | 0.633 | 2.91E-13 | 8 | 0.633382 |
| ATF5      | 2.12E-10 | 0.627585 | 0.574 | 0.244 | 7.12E-06 | 8 | 0.244696 |
| ATOX1     | 1.47E-06 | 0.292561 | 0.981 | 0.858 | 0.049247 | 8 | 0.858569 |
| ATP1A2    | 3.7E-141 | 1.468427 | 0.907 | 0.068 | 1.2E-136 | 8 | 0.070076 |
| ATP6AP2   | 2.4E-08  | 0.338107 | 0.907 | 0.681 | 0.000806 | 8 | 0.681426 |
| ATP6V0E1  | 1.39E-11 | 0.41225  | 0.981 | 0.753 | 4.67E-07 | 8 | 0.753314 |
| B2M       | 4.76E-27 | 0.935403 | 1     | 0.57  | 1.6E-22  | 8 | 0.570555 |
| BCAP29    | 4.57E-09 | 0.30526  | 0.796 | 0.427 | 0.000153 | 8 | 0.428094 |
| BCAT1     | 1.16E-97 | 0.544024 | 0.815 | 0.072 | 3.88E-93 | 8 | 0.073771 |
| BCL7C     | 8.31E-21 | 0.647806 | 0.981 | 0.674 | 2.79E-16 | 8 | 0.674141 |
| BGN       | 0        | 2.197426 | 1     | 0.001 | 0        | 8 | 0.003376 |
| BICC1     | 2.22E-43 | 0.263486 | 0.574 | 0.073 | 7.44E-39 | 8 | 0.074233 |
| BIN1      | 7.2E-18  | 0.356639 | 0.759 | 0.24  | 2.42E-13 | 8 | 0.240681 |
| C11orf96  | 3.36E-90 | 1.121711 | 0.926 | 0.107 | 1.13E-85 | 8 | 0.10817  |
| C14orf119 | 4.84E-12 | 0.349593 | 0.889 | 0.488 | 1.62E-07 | 8 | 0.488611 |
| C19orf70  | 8.39E-12 | 0.405675 | 0.944 | 0.632 | 2.81E-07 | 8 | 0.6326   |
| C1orf122  | 3.06E-21 | 0.671261 | 1     | 0.781 | 1.03E-16 | 8 | 0.781813 |
| C1orf54   | 4.24E-32 | 0.34962  | 0.63  | 0.116 | 1.42E-27 | 8 | 0.117089 |
| C4orf3    | 8.54E-08 | 0.292956 | 0.981 | 0.772 | 0.002865 | 8 | 0.772503 |
| C7        | 0        | 0.32476  | 0.352 | 0     | 0        | 8 | 0.001102 |
| CALD1     | 4.48E-36 | 1.758708 | 1     | 0.794 | 1.5E-31  | 8 | 0.794712 |
| CALM1     | 1.4E-08  | 0.312087 | 1     | 0.99  | 0.00047  | 8 | 0.99037  |
| CALR      | 1.44E-26 | 1.072946 | 0.981 | 0.894 | 4.82E-22 | 8 | 0.894496 |
| CALU      | 2.1E-35  | 1.219498 | 1     | 0.723 | 7.03E-31 | 8 | 0.723855 |
| CAP1      | 1.21E-11 | 0.474438 | 0.981 | 0.714 | 4.05E-07 | 8 | 0.71426  |
| CAPN2     | 5.57E-12 | 0.324772 | 0.833 | 0.388 | 1.87E-07 | 8 | 0.388508 |
| CAPNS1    | 8.55E-08 | 0.283984 | 0.963 | 0.627 | 0.002867 | 8 | 0.628052 |
| CAPZB     | 4.42E-10 | 0.351373 | 1     | 0.824 | 1.48E-05 | 8 | 0.824313 |
| CARMN     | 0        | 0.400002 | 0.556 | 0     | 0        | 8 | 0.001421 |
| CAST      | 1.8E-17  | 0.309218 | 0.611 | 0.172 | 6.04E-13 | 8 | 0.173164 |
| CAVIN1    | 6.55E-81 | 0.40315  | 0.519 | 0.035 | 2.2E-76  | 8 | 0.036175 |
| CAVIN3    | 0        | 0.720398 | 0.778 | 0.006 | 0        | 8 | 0.007747 |

|          |          |          |       |       |          |   |          |
|----------|----------|----------|-------|-------|----------|---|----------|
| CCDC80   | 1.2E-191 | 1.055354 | 0.815 | 0.038 | 3.9E-187 | 8 | 0.0398   |
| CCL2     | 2.58E-70 | 0.544025 | 0.463 | 0.033 | 8.64E-66 | 8 | 0.03351  |
| CCPG1    | 4.45E-40 | 0.909781 | 0.907 | 0.268 | 1.49E-35 | 8 | 0.268754 |
| CD151    | 1.11E-06 | 0.263099 | 0.815 | 0.549 | 0.037186 | 8 | 0.549447 |
| CD164    | 8.27E-27 | 0.645098 | 0.87  | 0.336 | 2.77E-22 | 8 | 0.337088 |
| CD248    | 0        | 0.928534 | 0.815 | 0.015 | 0        | 8 | 0.016204 |
| CD276    | 2.94E-10 | 0.282019 | 0.722 | 0.307 | 9.85E-06 | 8 | 0.308091 |
| CD63     | 2.88E-33 | 1.19325  | 1     | 0.954 | 9.65E-29 | 8 | 0.953875 |
| CD81     | 4.13E-16 | 0.532969 | 1     | 0.956 | 1.39E-11 | 8 | 0.956469 |
| CD99     | 1.59E-28 | 1.067264 | 0.981 | 0.718 | 5.35E-24 | 8 | 0.718382 |
| CDC42EP1 | 3.5E-211 | 0.582884 | 0.704 | 0.026 | 1.2E-206 | 8 | 0.027078 |
| CDC42EP5 | 5.9E-138 | 1.645148 | 0.981 | 0.088 | 2E-133   | 8 | 0.089975 |
| CDH11    | 1.7E-194 | 1.568829 | 0.981 | 0.059 | 5.7E-190 | 8 | 0.061014 |
| CDH6     | 4.3E-115 | 0.638224 | 0.667 | 0.042 | 1.5E-110 | 8 | 0.042749 |
| CDKN1C   | 4.76E-16 | 0.263536 | 0.778 | 0.243 | 1.6E-11  | 8 | 0.244448 |
| CEBPB    | 1.53E-84 | 0.571045 | 0.722 | 0.066 | 5.14E-80 | 8 | 0.067304 |
| CEBPD    | 3.5E-234 | 0.430167 | 0.574 | 0.015 | 1.2E-229 | 8 | 0.016062 |
| CERCAM   | 3.46E-31 | 0.293583 | 0.593 | 0.104 | 1.16E-26 | 8 | 0.105007 |
| CFH      | 0        | 0.421021 | 0.648 | 0     | 0        | 8 | 0.001599 |
| CFLAR    | 3.06E-63 | 0.364198 | 0.667 | 0.069 | 1.03E-58 | 8 | 0.070502 |
| CIB1     | 5.63E-22 | 0.434244 | 0.889 | 0.317 | 1.89E-17 | 8 | 0.318148 |
| CKAP4    | 4.05E-24 | 0.705721 | 0.907 | 0.459 | 1.36E-19 | 8 | 0.459721 |
| CLDN11   | 0        | 0.603093 | 0.593 | 0.001 | 0        | 8 | 0.002594 |
| CLEC11A  | 7.12E-08 | 0.373961 | 0.704 | 0.389 | 0.002388 | 8 | 0.389858 |
| CLIC1    | 6.86E-27 | 0.978093 | 0.963 | 0.742 | 2.3E-22  | 8 | 0.742085 |
| CLIC4    | 4.94E-13 | 0.373764 | 0.778 | 0.374 | 1.66E-08 | 8 | 0.375253 |
| CMKLR1   | 0        | 0.302879 | 0.444 | 0     | 0        | 8 | 0.000888 |
| CMTM6    | 5.43E-08 | 0.29302  | 0.741 | 0.418 | 0.001821 | 8 | 0.41818  |
| COBLL1   | 2.01E-87 | 0.391278 | 0.593 | 0.042 | 6.74E-83 | 8 | 0.043282 |
| COL12A1  | 0        | 1.340964 | 0.963 | 0.008 | 0        | 8 | 0.010021 |
| COL13A1  | 0        | 0.445565 | 0.648 | 0.003 | 0        | 8 | 0.004513 |
| COL16A1  | 1.5E-187 | 0.472285 | 0.778 | 0.034 | 5.1E-183 | 8 | 0.035749 |
| COL18A1  | 8.96E-40 | 1.086304 | 0.926 | 0.279 | 3E-35    | 8 | 0.279983 |
| COL1A1   | 0        | 4.226422 | 1     | 0.022 | 0        | 8 | 0.023631 |
| COL1A2   | 0        | 3.82887  | 1     | 0.033 | 0        | 8 | 0.035251 |
| COL21A1  | 0        | 0.467954 | 0.537 | 0.004 | 0        | 8 | 0.00533  |
| COL26A1  | 3.86E-41 | 0.506726 | 0.63  | 0.096 | 1.3E-36  | 8 | 0.096905 |
| COL3A1   | 0        | 3.96718  | 1     | 0.015 | 0        | 8 | 0.016844 |
| COL4A1   | 2.38E-83 | 2.075248 | 0.963 | 0.152 | 7.98E-79 | 8 | 0.154046 |
| COL4A2   | 8.37E-44 | 1.676822 | 1     | 0.427 | 2.81E-39 | 8 | 0.428059 |
| COL5A1   | 1.9E-112 | 1.016925 | 0.963 | 0.1   | 6.2E-108 | 8 | 0.102057 |
| COL5A2   | 0        | 1.523749 | 1     | 0.033 | 0        | 8 | 0.034576 |
| COL5A3   | 3.6E-290 | 0.340777 | 0.463 | 0.008 | 1.2E-285 | 8 | 0.008528 |
| COL6A1   | 1.96E-42 | 1.350971 | 0.981 | 0.392 | 6.56E-38 | 8 | 0.392666 |
| COL6A2   | 1.2E-113 | 2.060132 | 1     | 0.117 | 4E-109   | 8 | 0.118226 |
| COL6A3   | 0        | 2.348437 | 1     | 0.001 | 0        | 8 | 0.003021 |
| COLEC12  | 1E-204   | 0.726163 | 0.815 | 0.035 | 3.4E-200 | 8 | 0.036282 |
| COMMD1   | 1.52E-07 | 0.253618 | 0.852 | 0.494 | 0.005106 | 8 | 0.494332 |



|         |          |          |       |       |          |   |          |
|---------|----------|----------|-------|-------|----------|---|----------|
| COPA    | 3.27E-09 | 0.322298 | 0.833 | 0.475 | 0.00011  | 8 | 0.475889 |
| COPB2   | 1.06E-16 | 0.54728  | 0.963 | 0.608 | 3.55E-12 | 8 | 0.608329 |
| COPZ2   | 0        | 0.815911 | 0.852 | 0.008 | 0        | 8 | 0.00963  |
| COTL1   | 1.18E-09 | 0.394137 | 0.87  | 0.528 | 3.96E-05 | 8 | 0.528482 |
| CPE     | 2.68E-07 | 0.262114 | 1     | 0.882 | 0.008973 | 8 | 0.882165 |
| CPED1   | 0        | 0.295351 | 0.444 | 0     | 0        | 8 | 0.001066 |
| CREB3L1 | 0        | 0.734125 | 0.87  | 0.009 | 0        | 8 | 0.010661 |
| CREB3L2 | 1.35E-27 | 0.296037 | 0.481 | 0.079 | 4.52E-23 | 8 | 0.079493 |
| CRELD2  | 3.8E-12  | 0.335197 | 0.833 | 0.381 | 1.28E-07 | 8 | 0.381472 |
| CREM    | 1.95E-08 | 0.290783 | 0.722 | 0.358 | 0.000654 | 8 | 0.3588   |
| CRNDE   | 1.25E-21 | 0.38231  | 0.852 | 0.271 | 4.2E-17  | 8 | 0.272378 |
| CRTAP   | 3.06E-15 | 0.396289 | 0.778 | 0.313 | 1.03E-10 | 8 | 0.314275 |
| CSRP1   | 6.44E-33 | 0.427986 | 0.481 | 0.07  | 2.16E-28 | 8 | 0.071177 |
| CSRP2   | 2.85E-10 | 0.457463 | 1     | 0.816 | 9.55E-06 | 8 | 0.816211 |
| CST3    | 2.19E-08 | 0.391652 | 0.944 | 0.805 | 0.000735 | 8 | 0.805622 |
| CTGF    | 1.36E-05 | 1.006101 | 0.204 | 0.065 | 0.455467 | 8 | 0.065172 |
| CTHRC1  | 0        | 1.681292 | 0.907 | 0.008 | 0        | 8 | 0.009239 |
| CTSB    | 5.87E-21 | 0.477414 | 0.852 | 0.312 | 1.97E-16 | 8 | 0.312818 |
| CTSC    | 1.12E-20 | 0.952439 | 0.889 | 0.449 | 3.75E-16 | 8 | 0.449842 |
| CTSK    | 0        | 0.581217 | 0.556 | 0.007 | 0        | 8 | 0.008422 |
| CTSL    | 1.56E-21 | 0.396605 | 0.815 | 0.253 | 5.22E-17 | 8 | 0.253936 |
| CXCL12  | 4.9E-137 | 0.633358 | 0.574 | 0.026 | 1.7E-132 | 8 | 0.027042 |
| CXXC5   | 7.36E-14 | 0.569142 | 0.926 | 0.633 | 2.47E-09 | 8 | 0.633275 |
| CYB5R3  | 4.83E-07 | 0.30926  | 0.889 | 0.635 | 0.016187 | 8 | 0.635727 |
| CYBRD1  | 6.47E-53 | 0.256764 | 0.537 | 0.054 | 2.17E-48 | 8 | 0.055044 |
| CYP1B1  | 0        | 1.554829 | 0.852 | 0.019 | 0        | 8 | 0.02093  |
| CYTOR   | 0        | 0.808266 | 0.778 | 0.02  | 0        | 8 | 0.021712 |
| DAB2    | 3.1E-216 | 0.620441 | 0.685 | 0.023 | 1E-211   | 8 | 0.024768 |
| DAD1    | 1.05E-16 | 0.447769 | 1     | 0.923 | 3.5E-12  | 8 | 0.922853 |
| DBNL    | 1.15E-05 | 0.291807 | 0.778 | 0.471 | 0.38655  | 8 | 0.471909 |
| DCN     | 0        | 3.300503 | 1     | 0.016 | 0        | 8 | 0.017874 |
| DCTD    | 1.94E-18 | 0.287375 | 0.815 | 0.267 | 6.52E-14 | 8 | 0.268434 |
| DDIT3   | 3.36E-42 | 0.360624 | 0.648 | 0.094 | 1.13E-37 | 8 | 0.095021 |
| DDOST   | 2.15E-10 | 0.409877 | 0.944 | 0.704 | 7.2E-06  | 8 | 0.704382 |
| DDR2    | 8.7E-251 | 0.697784 | 0.815 | 0.029 | 2.9E-246 | 8 | 0.030774 |
| DECR1   | 5.94E-10 | 0.311126 | 0.796 | 0.415 | 1.99E-05 | 8 | 0.415728 |
| DERL2   | 8.59E-12 | 0.305495 | 0.87  | 0.407 | 2.88E-07 | 8 | 0.407413 |
| DES12   | 1.04E-08 | 0.279308 | 0.815 | 0.451 | 0.000349 | 8 | 0.451654 |
| DKK2    | 0        | 0.397143 | 0.5   | 0.008 | 0        | 8 | 0.008919 |
| DLC1    | 2.2E-268 | 0.473709 | 0.685 | 0.019 | 7.4E-264 | 8 | 0.019864 |
| DNAJC1  | 8.06E-13 | 0.465011 | 0.87  | 0.485 | 2.7E-08  | 8 | 0.485661 |
| DNAJC12 | 3.09E-34 | 0.269647 | 0.63  | 0.1   | 1.04E-29 | 8 | 0.100814 |
| DNAJC15 | 2.94E-30 | 0.347675 | 0.574 | 0.1   | 9.87E-26 | 8 | 0.100494 |
| DNAJC3  | 4.51E-24 | 0.369159 | 0.759 | 0.198 | 1.51E-19 | 8 | 0.199389 |
| DSP     | 1E-295   | 0.721318 | 0.759 | 0.021 | 3.5E-291 | 8 | 0.022423 |
| DYNLT3  | 9.85E-23 | 0.302779 | 0.556 | 0.118 | 3.31E-18 | 8 | 0.11915  |
| DYRK4   | 8.59E-11 | 0.269874 | 0.704 | 0.276 | 2.88E-06 | 8 | 0.276465 |
| ECE1    | 1.68E-39 | 0.401218 | 0.556 | 0.077 | 5.64E-35 | 8 | 0.078284 |



|          |          |          |       |       |          |   |          |
|----------|----------|----------|-------|-------|----------|---|----------|
| ECM1     | 0        | 1.249472 | 0.963 | 0.011 | 0        | 8 | 0.01297  |
| EDIL3    | 3.22E-41 | 0.365146 | 0.611 | 0.084 | 1.08E-36 | 8 | 0.085391 |
| EDNRA    | 0        | 1.120257 | 0.926 | 0.002 | 0        | 8 | 0.004015 |
| EEA1     | 2.42E-11 | 0.329886 | 0.778 | 0.351 | 8.11E-07 | 8 | 0.351942 |
| EEF1A1   | 1.29E-13 | 0.252625 | 1     | 1     | 4.34E-09 | 8 | 0.999716 |
| EFEMP2   | 1.66E-50 | 0.543091 | 0.759 | 0.118 | 5.56E-46 | 8 | 0.119434 |
| EGFL7    | 3.44E-06 | 0.284815 | 0.704 | 0.407 | 0.115299 | 8 | 0.407342 |
| EGFR     | 2.66E-63 | 0.261416 | 0.444 | 0.032 | 8.91E-59 | 8 | 0.032977 |
| EGR1     | 2.31E-06 | 0.348565 | 0.722 | 0.439 | 0.077521 | 8 | 0.439075 |
| EHD2     | 0        | 0.317825 | 0.556 | 0.004 | 0        | 8 | 0.004833 |
| EIF1     | 1.94E-30 | 0.728604 | 1     | 0.997 | 6.49E-26 | 8 | 0.996944 |
| EIF2S2   | 6.98E-14 | 0.466792 | 0.963 | 0.86  | 2.34E-09 | 8 | 0.860026 |
| EIF3K    | 8.12E-08 | 0.271656 | 1     | 0.953 | 0.002722 | 8 | 0.952845 |
| EIF4E2   | 2.3E-09  | 0.30905  | 0.833 | 0.544 | 7.72E-05 | 8 | 0.544188 |
| EIF4EBP1 | 1.17E-18 | 0.696835 | 1     | 0.689 | 3.93E-14 | 8 | 0.68999  |
| ELF1     | 3E-25    | 0.263093 | 0.463 | 0.078 | 1E-20    | 8 | 0.079173 |
| ELK3     | 0        | 0.372781 | 0.63  | 0.007 | 0        | 8 | 0.008138 |
| ELOVL1   | 5.19E-26 | 0.304064 | 0.611 | 0.131 | 1.74E-21 | 8 | 0.132014 |
| ELP5     | 3.76E-06 | 0.252494 | 0.889 | 0.626 | 0.125978 | 8 | 0.626381 |
| EMCN     | 0        | 0.307226 | 0.463 | 0     | 0        | 8 | 0.001208 |
| EMP1     | 0        | 0.289305 | 0.407 | 0.004 | 0        | 8 | 0.005082 |
| EMP3     | 9.4E-39  | 1.003067 | 0.981 | 0.381 | 3.15E-34 | 8 | 0.381685 |
| ENG      | 0        | 0.32726  | 0.5   | 0.007 | 0        | 8 | 0.008102 |
| ENTPD1   | 0        | 0.423164 | 0.648 | 0.014 | 0        | 8 | 0.015387 |
| EPB41L2  | 2.59E-15 | 0.30384  | 0.722 | 0.24  | 8.69E-11 | 8 | 0.240574 |
| EPRS     | 4.86E-06 | 0.255086 | 0.889 | 0.641 | 0.162832 | 8 | 0.64191  |
| EPS8     | 2.65E-59 | 0.680654 | 0.852 | 0.138 | 8.9E-55  | 8 | 0.138908 |
| ERCC1    | 2.57E-07 | 0.285119 | 0.944 | 0.717 | 0.008631 | 8 | 0.717068 |
| ERLEC1   | 1.26E-10 | 0.280904 | 0.87  | 0.425 | 4.22E-06 | 8 | 0.425642 |
| ERRFI1   | 1.47E-19 | 0.287695 | 0.5   | 0.111 | 4.94E-15 | 8 | 0.111403 |
| ETS1     | 0        | 0.513127 | 0.722 | 0.001 | 0        | 8 | 0.002345 |
| EVA1B    | 9E-158   | 1.612697 | 0.981 | 0.076 | 3E-153   | 8 | 0.077929 |
| F2R      | 7.49E-12 | 0.352467 | 0.889 | 0.469 | 2.51E-07 | 8 | 0.469742 |
| F3       | 5.33E-73 | 0.353939 | 0.463 | 0.031 | 1.79E-68 | 8 | 0.031591 |
| FAAP20   | 2.84E-06 | 0.266089 | 0.944 | 0.814 | 0.095127 | 8 | 0.81447  |
| FABP3    | 1.2E-235 | 1.021171 | 0.778 | 0.028 | 3.9E-231 | 8 | 0.02985  |
| FABP5    | 1.2E-26  | 1.430726 | 0.981 | 0.861 | 4.02E-22 | 8 | 0.861661 |
| FAM114A1 | 2.61E-93 | 0.965773 | 0.926 | 0.113 | 8.77E-89 | 8 | 0.11414  |
| FAM43A   | 1.35E-45 | 0.267132 | 0.481 | 0.051 | 4.53E-41 | 8 | 0.051384 |
| FAP      | 0        | 0.826646 | 0.833 | 0.014 | 0        | 8 | 0.0156   |
| FBLIM1   | 3.1E-19  | 0.295507 | 0.556 | 0.136 | 1.04E-14 | 8 | 0.136776 |
| FBLN1    | 1.98E-24 | 0.82123  | 1     | 0.779 | 6.64E-20 | 8 | 0.779041 |
| FBLN2    | 1.4E-230 | 0.463031 | 0.63  | 0.018 | 4.8E-226 | 8 | 0.019651 |
| FBLN5    | 0        | 0.558245 | 0.667 | 0.011 | 0        | 8 | 0.012118 |
| FBN1     | 6.4E-163 | 0.725788 | 0.833 | 0.047 | 2.1E-158 | 8 | 0.048932 |
| FBN2     | 3.8E-42  | 0.499084 | 0.741 | 0.134 | 1.28E-37 | 8 | 0.135496 |
| FCGRT    | 6.2E-162 | 0.858605 | 0.87  | 0.054 | 2.1E-157 | 8 | 0.055364 |
| FERMT2   | 7.16E-16 | 0.505993 | 0.889 | 0.452 | 2.4E-11  | 8 | 0.452365 |

|         |          |          |       |       |          |   |          |
|---------|----------|----------|-------|-------|----------|---|----------|
| FHL2    | 1.01E-64 | 0.566688 | 0.796 | 0.103 | 3.4E-60  | 8 | 0.10419  |
| FHL3    | 8.23E-70 | 1.098618 | 0.926 | 0.159 | 2.76E-65 | 8 | 0.160549 |
| FIBIN   | 0        | 0.260736 | 0.352 | 0.003 | 0        | 8 | 0.003909 |
| FILIP1L | 7.43E-90 | 0.458311 | 0.574 | 0.038 | 2.49E-85 | 8 | 0.039409 |
| FKBP10  | 1.2E-32  | 0.95208  | 0.944 | 0.402 | 4.02E-28 | 8 | 0.403397 |
| FKBP14  | 6.04E-28 | 0.402794 | 0.685 | 0.155 | 2.03E-23 | 8 | 0.155858 |
| FKBP1A  | 3.55E-07 | 0.311094 | 0.963 | 0.897 | 0.011912 | 8 | 0.897267 |
| FKBP2   | 5.15E-06 | 0.250392 | 0.907 | 0.713 | 0.172712 | 8 | 0.713443 |
| FKBP7   | 5.01E-46 | 0.494273 | 0.778 | 0.134 | 1.68E-41 | 8 | 0.134963 |
| FLNA    | 2.93E-23 | 0.744937 | 0.963 | 0.505 | 9.82E-19 | 8 | 0.505526 |
| FLRT2   | 1.6E-139 | 1.246909 | 0.944 | 0.075 | 5.3E-135 | 8 | 0.077112 |
| FN1     | 5.2E-167 | 2.708257 | 1     | 0.075 | 1.7E-162 | 8 | 0.076614 |
| FNDC3B  | 7.94E-45 | 0.384935 | 0.667 | 0.097 | 2.66E-40 | 8 | 0.097971 |
| FOXC1   | 0        | 1.316085 | 0.944 | 0.007 | 0        | 8 | 0.008315 |
| FOXD1   | 0        | 0.677548 | 0.722 | 0.004 | 0        | 8 | 0.005615 |
| FOXF2   | 0        | 0.310133 | 0.574 | 0.001 | 0        | 8 | 0.002097 |
| FOXP1   | 6.52E-11 | 0.412562 | 0.907 | 0.514 | 2.19E-06 | 8 | 0.514374 |
| FOXS1   | 0        | 0.317471 | 0.389 | 0     | 0        | 8 | 0.001137 |
| FRZB    | 0        | 1.979068 | 1     | 0.023 | 0        | 8 | 0.025017 |
| FSTL1   | 3.2E-48  | 1.159885 | 0.944 | 0.248 | 1.07E-43 | 8 | 0.2496   |
| FTH1    | 5.27E-28 | 0.796458 | 1     | 0.997 | 1.77E-23 | 8 | 0.997299 |
| FTL     | 3.47E-27 | 0.79829  | 1     | 0.995 | 1.16E-22 | 8 | 0.994883 |
| FUCA2   | 3.85E-32 | 0.320827 | 0.722 | 0.14  | 1.29E-27 | 8 | 0.14136  |
| FUOM    | 3.78E-41 | 0.493426 | 0.778 | 0.144 | 1.27E-36 | 8 | 0.144771 |
| FXYS5   | 0        | 0.48985  | 0.63  | 0.012 | 0        | 8 | 0.013148 |
| GADD45A | 1.61E-12 | 0.30987  | 0.759 | 0.306 | 5.4E-08  | 8 | 0.306706 |
| GADD45B | 4.1E-77  | 0.309537 | 0.463 | 0.029 | 1.38E-72 | 8 | 0.03017  |
| GANAB   | 2.47E-12 | 0.294676 | 0.833 | 0.345 | 8.27E-08 | 8 | 0.345475 |
| GARS    | 1.66E-15 | 0.593124 | 0.944 | 0.571 | 5.58E-11 | 8 | 0.57187  |
| GDF15   | 0        | 0.913978 | 0.537 | 0.003 | 0        | 8 | 0.003554 |
| GGT5    | 0        | 0.286912 | 0.5   | 0.002 | 0        | 8 | 0.002736 |
| GLIPR1  | 0        | 0.436462 | 0.648 | 0.007 | 0        | 8 | 0.008635 |
| GLIPR2  | 4.53E-17 | 0.315745 | 0.759 | 0.249 | 1.52E-12 | 8 | 0.249849 |
| GLT8D1  | 1.85E-10 | 0.31614  | 0.87  | 0.535 | 6.2E-06  | 8 | 0.53598  |
| GLT8D2  | 2.1E-233 | 0.439533 | 0.648 | 0.019 | 7E-229   | 8 | 0.020433 |
| GMDS    | 2.67E-28 | 0.434671 | 0.741 | 0.172 | 8.95E-24 | 8 | 0.172666 |
| GNG11   | 1.03E-91 | 1.118821 | 0.944 | 0.12  | 3.46E-87 | 8 | 0.121602 |
| GNG12   | 5.64E-19 | 0.357343 | 0.778 | 0.249 | 1.89E-14 | 8 | 0.250027 |
| GNG5    | 1.48E-17 | 0.581278 | 1     | 0.832 | 4.96E-13 | 8 | 0.83238  |
| GNL1    | 1.34E-15 | 0.452745 | 0.852 | 0.375 | 4.49E-11 | 8 | 0.375964 |
| GOLGA2  | 7.73E-11 | 0.28799  | 0.759 | 0.311 | 2.59E-06 | 8 | 0.311752 |
| GOLGA3  | 9.27E-14 | 0.251352 | 0.611 | 0.188 | 3.11E-09 | 8 | 0.189048 |
| GOLT1B  | 3.99E-13 | 0.278372 | 0.648 | 0.226 | 1.34E-08 | 8 | 0.226751 |
| GPC6    | 1.38E-14 | 0.329238 | 0.833 | 0.338 | 4.62E-10 | 8 | 0.339291 |
| GPER1   | 0        | 0.275373 | 0.407 | 0.004 | 0        | 8 | 0.005224 |
| GPX7    | 8.78E-22 | 0.348801 | 0.741 | 0.199 | 2.94E-17 | 8 | 0.200064 |
| GPX8    | 2.66E-60 | 0.882056 | 0.926 | 0.183 | 8.91E-56 | 8 | 0.184073 |
| GSN     | 3.27E-50 | 1.353338 | 0.944 | 0.262 | 1.1E-45  | 8 | 0.263281 |

|         |          |          |       |       |          |   |          |
|---------|----------|----------|-------|-------|----------|---|----------|
| GSTK1   | 6.13E-23 | 0.379384 | 0.759 | 0.212 | 2.06E-18 | 8 | 0.213319 |
| GSTO1   | 9.29E-32 | 0.769748 | 0.963 | 0.383 | 3.12E-27 | 8 | 0.383959 |
| GUCY1A1 | 2.05E-45 | 1.129483 | 0.87  | 0.203 | 6.88E-41 | 8 | 0.204222 |
| GYPE    | 1.1E-116 | 1.409094 | 0.981 | 0.104 | 3.7E-112 | 8 | 0.105647 |
| GZMA    | 0        | 0.672287 | 0.389 | 0     | 0        | 8 | 0.000888 |
| H2AFJ   | 3.28E-19 | 0.32039  | 0.648 | 0.172 | 1.1E-14  | 8 | 0.172737 |
| HAPLN1  | 0        | 0.588636 | 0.685 | 0.001 | 0        | 8 | 0.002203 |
| HAX1    | 1.55E-08 | 0.308526 | 0.87  | 0.547 | 0.000521 | 8 | 0.547138 |
| HDCC2   | 1.42E-06 | 0.279158 | 0.963 | 0.76  | 0.047537 | 8 | 0.760634 |
| HDLBP   | 3.85E-15 | 0.515419 | 0.944 | 0.669 | 1.29E-10 | 8 | 0.669273 |
| HERPUD1 | 4.25E-25 | 0.646438 | 0.926 | 0.368 | 1.43E-20 | 8 | 0.368608 |
| HIC1    | 0        | 0.759434 | 0.759 | 0.007 | 0        | 8 | 0.008422 |
| HLA-E   | 6.99E-26 | 0.341296 | 0.685 | 0.161 | 2.34E-21 | 8 | 0.162325 |
| HM13    | 1.19E-11 | 0.403946 | 0.889 | 0.583 | 3.99E-07 | 8 | 0.584023 |
| HMOX2   | 8.75E-10 | 0.251411 | 0.722 | 0.307 | 2.93E-05 | 8 | 0.307594 |
| HOPX    | 3.58E-23 | 0.488603 | 0.481 | 0.092 | 1.2E-18  | 8 | 0.093138 |
| HSP90B1 | 2.45E-24 | 0.898095 | 1     | 0.863 | 8.22E-20 | 8 | 0.863473 |
| HSPA5   | 7.21E-26 | 0.91506  | 1     | 0.766 | 2.42E-21 | 8 | 0.766639 |
| HSPB1   | 1.1E-19  | 0.665515 | 0.963 | 0.614 | 3.71E-15 | 8 | 0.614584 |
| HTRA1   | 3.73E-21 | 0.456668 | 0.63  | 0.158 | 1.25E-16 | 8 | 0.15863  |
| IARS    | 1.55E-11 | 0.306185 | 0.944 | 0.469 | 5.21E-07 | 8 | 0.4696   |
| IER2    | 3.5E-07  | 0.441989 | 0.87  | 0.729 | 0.011753 | 8 | 0.729185 |
| IER3    | 3.85E-74 | 1.241772 | 0.87  | 0.119 | 1.29E-69 | 8 | 0.120785 |
| IER5L   | 4.54E-21 | 0.734721 | 0.907 | 0.433 | 1.52E-16 | 8 | 0.433496 |
| IFITM1  | 1.95E-82 | 0.458789 | 0.593 | 0.045 | 6.55E-78 | 8 | 0.045841 |
| IFITM2  | 8.24E-77 | 0.320624 | 0.574 | 0.044 | 2.76E-72 | 8 | 0.044739 |
| IFITM3  | 3.12E-45 | 1.989325 | 0.981 | 0.342 | 1.05E-40 | 8 | 0.343556 |
| IFT20   | 7.24E-08 | 0.316351 | 0.759 | 0.463 | 0.002427 | 8 | 0.463416 |
| IGFBP2  | 8.68E-20 | 0.807615 | 0.981 | 0.977 | 2.91E-15 | 8 | 0.977115 |
| IGFBP3  | 0        | 1.170207 | 0.556 | 0.01  | 0        | 8 | 0.011478 |
| IGFBP4  | 3.52E-28 | 0.630951 | 0.796 | 0.237 | 1.18E-23 | 8 | 0.237731 |
| IGFBP5  | 3.96E-35 | 2.539271 | 0.963 | 0.414 | 1.33E-30 | 8 | 0.414804 |
| IGFBP6  | 1.8E-238 | 0.37591  | 0.556 | 0.014 | 6.1E-234 | 8 | 0.014783 |
| IGFBP7  | 1.7E-156 | 2.021859 | 0.889 | 0.056 | 5.8E-152 | 8 | 0.057176 |
| IKBIP   | 3.3E-23  | 0.526294 | 0.907 | 0.338 | 1.11E-18 | 8 | 0.338865 |
| ILK     | 2.68E-23 | 0.602646 | 0.963 | 0.5   | 8.99E-19 | 8 | 0.5008   |
| INAFM1  | 2.12E-13 | 0.360735 | 0.815 | 0.342 | 7.11E-09 | 8 | 0.343129 |
| INHBA   | 6E-166   | 0.293524 | 0.222 | 0.003 | 2E-161   | 8 | 0.003447 |
| INKA1   | 2.8E-182 | 0.405881 | 0.611 | 0.022 | 9.3E-178 | 8 | 0.023169 |
| ISG15   | 1.26E-24 | 0.517219 | 0.63  | 0.151 | 4.21E-20 | 8 | 0.152269 |
| ISLR    | 0        | 1.221206 | 0.926 | 0.015 | 0        | 8 | 0.016844 |
| ITGA1   | 0        | 0.57556  | 0.593 | 0.003 | 0        | 8 | 0.004193 |
| ITGA11  | 0        | 0.617847 | 0.648 | 0.002 | 0        | 8 | 0.002985 |
| ITGA5   | 1.3E-260 | 0.425863 | 0.63  | 0.016 | 4.5E-256 | 8 | 0.017412 |
| ITGA8   | 0        | 0.9474   | 0.833 | 0     | 0        | 8 | 0.001954 |
| ITGAV   | 6.03E-48 | 0.441928 | 0.722 | 0.109 | 2.02E-43 | 8 | 0.110088 |
| ITGB1   | 2.97E-33 | 1.198893 | 0.981 | 0.648 | 9.94E-29 | 8 | 0.648911 |
| ITIH2   | 0        | 0.924803 | 0.574 | 0     | 0        | 8 | 0.00135  |

|          |          |          |       |       |          |   |          |
|----------|----------|----------|-------|-------|----------|---|----------|
| ITIH5    | 0        | 1.029683 | 0.741 | 0.004 | 0        | 8 | 0.005899 |
| ITM2A    | 4.9E-178 | 0.740973 | 0.759 | 0.036 | 1.7E-173 | 8 | 0.037134 |
| ITM2B    | 4.96E-16 | 0.434462 | 0.981 | 0.882 | 1.66E-11 | 8 | 0.882271 |
| ITM2C    | 3.69E-41 | 1.723243 | 1     | 0.5   | 1.24E-36 | 8 | 0.500551 |
| ITPRIPL2 | 2E-111   | 0.307579 | 0.5   | 0.024 | 6.8E-107 | 8 | 0.024981 |
| JAG1     | 1.13E-23 | 0.283215 | 0.519 | 0.102 | 3.8E-19  | 8 | 0.102448 |
| JAK1     | 4.4E-19  | 0.473048 | 0.907 | 0.391 | 1.48E-14 | 8 | 0.392239 |
| JCAD     | 6.9E-186 | 0.315542 | 0.519 | 0.015 | 2.3E-181 | 8 | 0.016346 |
| JMJD1C   | 1.66E-11 | 0.415028 | 0.926 | 0.588 | 5.58E-07 | 8 | 0.588359 |
| JOSD2    | 9.77E-36 | 0.390514 | 0.815 | 0.168 | 3.28E-31 | 8 | 0.169255 |
| JTB      | 3.52E-07 | 0.292386 | 0.981 | 0.854 | 0.011793 | 8 | 0.854376 |
| JUN      | 4.68E-07 | 0.340985 | 0.944 | 0.691 | 0.015712 | 8 | 0.69102  |
| JUNB     | 2.67E-20 | 0.654046 | 0.796 | 0.293 | 8.95E-16 | 8 | 0.294197 |
| KANK2    | 1.9E-100 | 0.876931 | 0.852 | 0.084 | 6.2E-96  | 8 | 0.085818 |
| KCNG1    | 1.81E-07 | 0.320873 | 0.778 | 0.454 | 0.00608  | 8 | 0.454142 |
| KCNQ1OT1 | 2.27E-19 | 0.991898 | 0.926 | 0.467 | 7.6E-15  | 8 | 0.468356 |
| KCTD12   | 1.39E-57 | 0.421977 | 0.574 | 0.059 | 4.67E-53 | 8 | 0.060339 |
| KDELR1   | 5.4E-10  | 0.343897 | 0.981 | 0.884 | 1.81E-05 | 8 | 0.884332 |
| KDELR2   | 3.22E-33 | 1.087146 | 1     | 0.704 | 1.08E-28 | 8 | 0.704488 |
| KDELR3   | 2.6E-245 | 0.712676 | 0.852 | 0.033 | 8.8E-241 | 8 | 0.034256 |
| KIAA1755 | 0        | 0.839198 | 0.815 | 0.001 | 0        | 8 | 0.002416 |
| KLF10    | 4.14E-20 | 0.265772 | 0.5   | 0.108 | 1.39E-15 | 8 | 0.108774 |
| KLF6     | 1.7E-16  | 0.557716 | 0.926 | 0.463 | 5.71E-12 | 8 | 0.463736 |
| KLHL4    | 0        | 0.357782 | 0.611 | 0.012 | 0        | 8 | 0.013113 |
| KLHL5    | 1.32E-18 | 0.29707  | 0.611 | 0.163 | 4.43E-14 | 8 | 0.163996 |
| KRT10    | 3.34E-21 | 0.641708 | 1     | 0.845 | 1.12E-16 | 8 | 0.845315 |
| KRT18    | 5.96E-10 | 0.648638 | 0.426 | 0.13  | 2E-05    | 8 | 0.130308 |
| KRT8     | 2.17E-27 | 0.448479 | 0.426 | 0.059 | 7.27E-23 | 8 | 0.060019 |
| LAMA1    | 4.73E-46 | 0.5191   | 0.759 | 0.129 | 1.59E-41 | 8 | 0.130415 |
| LAMA2    | 0        | 1.205424 | 0.926 | 0.006 | 0        | 8 | 0.007427 |
| LAMA4    | 0        | 0.950319 | 0.852 | 0.014 | 0        | 8 | 0.01592  |
| LAMB1    | 1.3E-179 | 1.427726 | 0.981 | 0.065 | 4.3E-175 | 8 | 0.067233 |
| LAMB2    | 3.92E-47 | 0.380125 | 0.741 | 0.113 | 1.31E-42 | 8 | 0.114388 |
| LAMC1    | 1.32E-81 | 0.840164 | 0.87  | 0.107 | 4.42E-77 | 8 | 0.108951 |
| LAMC3    | 0        | 1.548432 | 0.981 | 0.001 | 0        | 8 | 0.003092 |
| LAMP1    | 1.41E-14 | 0.375203 | 0.907 | 0.439 | 4.73E-10 | 8 | 0.439537 |
| LAMP2    | 1.9E-16  | 0.283701 | 0.741 | 0.238 | 6.37E-12 | 8 | 0.238869 |
| LAMP5    | 0        | 0.776557 | 0.648 | 0.014 | 0        | 8 | 0.014889 |
| LAPTM4A  | 6.01E-36 | 1.328108 | 1     | 0.833 | 2.01E-31 | 8 | 0.832948 |
| LAYN     | 4.1E-113 | 0.262726 | 0.333 | 0.011 | 1.4E-108 | 8 | 0.011158 |
| LDHA     | 9.24E-08 | 0.437611 | 0.963 | 0.706 | 0.003098 | 8 | 0.706087 |
| LEPROT   | 1.15E-11 | 0.281585 | 0.815 | 0.357 | 3.84E-07 | 8 | 0.358232 |
| LGALS1   | 3.7E-217 | 3.986627 | 1     | 0.056 | 1.2E-212 | 8 | 0.057745 |
| LGALS3   | 0        | 1.098385 | 0.87  | 0.023 | 0        | 8 | 0.024519 |
| LHFPL6   | 8.06E-66 | 0.867636 | 0.981 | 0.158 | 2.7E-61  | 8 | 0.15998  |
| LIMA1    | 7.62E-28 | 0.497382 | 0.796 | 0.214 | 2.55E-23 | 8 | 0.215131 |
| LIMD2    | 1.58E-06 | 0.302647 | 0.944 | 0.688 | 0.052945 | 8 | 0.688959 |
| LIMS1    | 7.65E-08 | 0.30254  | 0.796 | 0.508 | 0.002565 | 8 | 0.508262 |

|           |          |          |       |       |          |   |          |
|-----------|----------|----------|-------|-------|----------|---|----------|
| LINC01088 | 1.47E-62 | 0.466572 | 0.611 | 0.061 | 4.92E-58 | 8 | 0.06176  |
| LITAF     | 1.85E-41 | 0.834315 | 0.815 | 0.184 | 6.2E-37  | 8 | 0.185601 |
| LMAN1     | 8.23E-21 | 0.576826 | 0.907 | 0.388 | 2.76E-16 | 8 | 0.388792 |
| LMNA      | 2.16E-35 | 0.871884 | 0.981 | 0.351 | 7.24E-31 | 8 | 0.352049 |
| LMO2      | 2.28E-43 | 0.928074 | 0.852 | 0.186 | 7.64E-39 | 8 | 0.187129 |
| LOX       | 9.6E-297 | 0.324843 | 0.5   | 0.009 | 3.2E-292 | 8 | 0.009701 |
| LOXL2     | 0        | 0.823407 | 0.833 | 0.017 | 0        | 8 | 0.018834 |
| LPP       | 4.61E-48 | 0.545019 | 0.778 | 0.133 | 1.54E-43 | 8 | 0.133862 |
| LRP1      | 1.15E-27 | 0.691205 | 0.944 | 0.365 | 3.87E-23 | 8 | 0.366085 |
| LRP10     | 1.39E-41 | 0.4624   | 0.722 | 0.125 | 4.65E-37 | 8 | 0.126328 |
| LRRC17    | 3.8E-72  | 1.596011 | 0.981 | 0.19  | 1.27E-67 | 8 | 0.191571 |
| LRRC59    | 8.09E-08 | 0.28162  | 0.852 | 0.499 | 0.002714 | 8 | 0.49984  |
| LUM       | 0        | 2.91792  | 1     | 0.017 | 0        | 8 | 0.018656 |
| LUZP2     | 0        | 0.787469 | 0.704 | 0.008 | 0        | 8 | 0.009559 |
| LYPD1     | 5.67E-38 | 0.632484 | 0.741 | 0.145 | 1.9E-33  | 8 | 0.146121 |
| MAGED2    | 2.71E-24 | 0.685126 | 1     | 0.971 | 9.07E-20 | 8 | 0.971074 |
| MAN1A1    | 4.36E-96 | 0.273947 | 0.444 | 0.022 | 1.46E-91 | 8 | 0.022494 |
| MAN1B1    | 4.49E-14 | 0.250865 | 0.704 | 0.24  | 1.5E-09  | 8 | 0.240823 |
| MANF      | 2.22E-12 | 0.537065 | 0.87  | 0.609 | 7.45E-08 | 8 | 0.609218 |
| MAP3K20   | 2.2E-13  | 0.307657 | 0.722 | 0.266 | 7.37E-09 | 8 | 0.267297 |
| MAP4      | 4.51E-08 | 0.335569 | 0.87  | 0.595 | 0.001511 | 8 | 0.595857 |
| MARS      | 1.74E-13 | 0.337491 | 0.796 | 0.328 | 5.85E-09 | 8 | 0.329057 |
| MARVELD1  | 2.91E-39 | 0.407856 | 0.741 | 0.135 | 9.77E-35 | 8 | 0.135958 |
| MATN2     | 2.9E-131 | 0.280627 | 0.444 | 0.016 | 9.6E-127 | 8 | 0.016986 |
| MDFI      | 1.39E-48 | 1.238616 | 0.963 | 0.29  | 4.67E-44 | 8 | 0.291603 |
| MDK       | 1.23E-32 | 1.43004  | 1     | 0.762 | 4.12E-28 | 8 | 0.761984 |
| MEF2A     | 7.96E-14 | 0.301592 | 0.704 | 0.255 | 2.67E-09 | 8 | 0.255464 |
| MEST      | 1.51E-08 | 0.396764 | 0.704 | 0.283 | 0.000505 | 8 | 0.283359 |
| MFAP2     | 2.4E-17  | 0.533376 | 0.87  | 0.39  | 8.05E-13 | 8 | 0.391173 |
| MFAP4     | 6.98E-80 | 1.404092 | 0.944 | 0.136 | 2.34E-75 | 8 | 0.137344 |
| MGAT1     | 1E-19    | 0.398912 | 0.722 | 0.232 | 3.35E-15 | 8 | 0.23329  |
| MGP       | 2.2E-238 | 2.121835 | 0.519 | 0.012 | 7.3E-234 | 8 | 0.01297  |
| MICAL2    | 1.5E-260 | 0.31995  | 0.426 | 0.007 | 4.9E-256 | 8 | 0.008031 |
| MIR4435-2 | 1.8E-259 | 0.584873 | 0.685 | 0.02  | 6E-255   | 8 | 0.020788 |
| MIR99AHG  | 8.28E-25 | 0.51605  | 0.87  | 0.271 | 2.78E-20 | 8 | 0.271668 |
| MLEC      | 5.03E-11 | 0.415893 | 0.981 | 0.654 | 1.69E-06 | 8 | 0.654241 |
| MMP11     | 2.07E-27 | 0.372469 | 0.481 | 0.08  | 6.94E-23 | 8 | 0.080985 |
| MMP14     | 0        | 0.485391 | 0.759 | 0.011 | 0        | 8 | 0.012544 |
| MMP16     | 2.99E-65 | 0.571136 | 0.833 | 0.113 | 1E-60    | 8 | 0.114815 |
| MMP2      | 4.18E-84 | 0.381061 | 0.481 | 0.029 | 1.4E-79  | 8 | 0.030098 |
| MRC2      | 8.03E-43 | 0.668573 | 0.889 | 0.216 | 2.69E-38 | 8 | 0.216943 |
| MSN       | 5.77E-40 | 0.710273 | 0.944 | 0.256 | 1.94E-35 | 8 | 0.257525 |
| MSX1      | 2.31E-56 | 0.688991 | 0.796 | 0.115 | 7.76E-52 | 8 | 0.116414 |
| MT-CO1    | 1.84E-11 | 0.30057  | 1     | 0.995 | 6.16E-07 | 8 | 0.994705 |
| MT2A      | 2.31E-09 | 0.427429 | 0.722 | 0.346 | 7.76E-05 | 8 | 0.347038 |
| MTCH1     | 1.98E-09 | 0.360721 | 0.981 | 0.901 | 6.65E-05 | 8 | 0.901247 |
| MTHFD2    | 6.22E-17 | 0.533914 | 0.722 | 0.3   | 2.09E-12 | 8 | 0.300665 |
| MUM1L1    | 6.6E-254 | 0.800171 | 0.704 | 0.021 | 2.2E-249 | 8 | 0.022529 |



|          |          |          |       |       |          |   |          |
|----------|----------|----------|-------|-------|----------|---|----------|
| MXD4     | 1.65E-08 | 0.275846 | 0.889 | 0.517 | 0.000554 | 8 | 0.517821 |
| MXRA5    | 2.1E-107 | 0.303557 | 0.519 | 0.026 | 7.2E-103 | 8 | 0.027433 |
| MXRA8    | 4.4E-154 | 0.415015 | 0.537 | 0.02  | 1.5E-149 | 8 | 0.021179 |
| MYADM    | 2.28E-40 | 0.427003 | 0.741 | 0.131 | 7.64E-36 | 8 | 0.132298 |
| MYDGF    | 8.2E-27  | 0.769574 | 0.981 | 0.655 | 2.75E-22 | 8 | 0.655165 |
| MYH9     | 3.75E-39 | 0.53613  | 0.778 | 0.154 | 1.26E-34 | 8 | 0.155432 |
| MYL12A   | 9.53E-36 | 1.353    | 0.981 | 0.55  | 3.2E-31  | 8 | 0.551295 |
| MYL12B   | 2.33E-17 | 0.531157 | 1     | 0.923 | 7.8E-13  | 8 | 0.922675 |
| MYL6     | 2.2E-17  | 0.471356 | 1     | 0.99  | 7.39E-13 | 8 | 0.989553 |
| MYL9     | 1E-153   | 0.668222 | 0.667 | 0.031 | 3.5E-149 | 8 | 0.032124 |
| MYO1C    | 1.6E-34  | 0.337872 | 0.63  | 0.104 | 5.36E-30 | 8 | 0.105433 |
| NAGK     | 1.22E-08 | 0.255005 | 0.759 | 0.379 | 0.00041  | 8 | 0.379837 |
| NANS     | 1.81E-09 | 0.316258 | 0.796 | 0.439 | 6.06E-05 | 8 | 0.439323 |
| NBL1     | 8E-87    | 0.521792 | 0.704 | 0.06  | 2.68E-82 | 8 | 0.061689 |
| NDUFA4L2 | 3.76E-12 | 0.310984 | 0.259 | 0.049 | 1.26E-07 | 8 | 0.049714 |
| NEAT1    | 2.49E-37 | 0.986907 | 0.889 | 0.225 | 8.36E-33 | 8 | 0.226182 |
| NECTIN2  | 3.92E-11 | 0.329186 | 0.815 | 0.38  | 1.31E-06 | 8 | 0.380583 |
| NEFM     | 1.12E-11 | 0.30973  | 0.444 | 0.126 | 3.76E-07 | 8 | 0.126222 |
| NENF     | 4.47E-09 | 0.312038 | 0.963 | 0.65  | 0.00015  | 8 | 0.650297 |
| NFIC     | 8.83E-15 | 0.351247 | 0.796 | 0.315 | 2.96E-10 | 8 | 0.316087 |
| NID1     | 0        | 0.500641 | 0.704 | 0.017 | 0        | 8 | 0.017839 |
| NID2     | 0        | 0.448498 | 0.685 | 0.007 | 0        | 8 | 0.008564 |
| NKD1     | 4.04E-84 | 0.630324 | 0.685 | 0.061 | 1.35E-79 | 8 | 0.062116 |
| NKD2     | 6E-184   | 0.619229 | 0.741 | 0.033 | 2E-179   | 8 | 0.034292 |
| NMRAL1   | 6.92E-20 | 0.263465 | 0.63  | 0.151 | 2.32E-15 | 8 | 0.151771 |
| NOTCH3   | 4.49E-15 | 0.318082 | 0.87  | 0.325 | 1.5E-10  | 8 | 0.326143 |
| NPC2     | 1.58E-05 | 0.255491 | 0.852 | 0.593 | 0.530803 | 8 | 0.593049 |
| NR2F1    | 9.59E-15 | 0.515064 | 0.981 | 0.759 | 3.22E-10 | 8 | 0.75907  |
| NR2F2    | 3.55E-35 | 1.151184 | 0.981 | 0.402 | 1.19E-30 | 8 | 0.402686 |
| NR3C1    | 3.8E-162 | 0.804817 | 0.889 | 0.055 | 1.3E-157 | 8 | 0.056999 |
| NREP     | 6.62E-08 | 0.252849 | 1     | 0.912 | 0.002221 | 8 | 0.912405 |
| NTAN1    | 1.25E-23 | 0.553254 | 0.833 | 0.302 | 4.2E-19  | 8 | 0.303081 |
| NTM      | 1.89E-98 | 1.447092 | 0.963 | 0.11  | 6.35E-94 | 8 | 0.111297 |
| NTRK2    | 2.25E-73 | 0.563127 | 0.685 | 0.066 | 7.56E-69 | 8 | 0.066735 |
| NUCB1    | 4.29E-14 | 0.448246 | 0.87  | 0.447 | 1.44E-09 | 8 | 0.447532 |
| NUCB2    | 3.8E-05  | 0.277543 | 0.815 | 0.663 | 1        | 8 | 0.663551 |
| NUPR1    | 0        | 1.855272 | 0.944 | 0.004 | 0        | 8 | 0.00629  |
| OAF      | 7.06E-37 | 0.617136 | 0.926 | 0.249 | 2.37E-32 | 8 | 0.249849 |
| OGN      | 0        | 0.544913 | 0.519 | 0.001 | 0        | 8 | 0.001812 |
| OLFM2    | 5.88E-16 | 0.509732 | 0.889 | 0.386 | 1.97E-11 | 8 | 0.387335 |
| OLFML1   | 0        | 0.250357 | 0.481 | 0.001 | 0        | 8 | 0.001457 |
| OLFML3   | 0        | 1.319797 | 0.907 | 0.007 | 0        | 8 | 0.009062 |
| OS9      | 3.24E-11 | 0.311638 | 0.889 | 0.483 | 1.09E-06 | 8 | 0.484027 |
| OSR1     | 0        | 0.355966 | 0.407 | 0.001 | 0        | 8 | 0.001457 |
| OST4     | 1.29E-25 | 0.656129 | 1     | 0.958 | 4.34E-21 | 8 | 0.958175 |
| OSTC     | 8.04E-29 | 0.920843 | 1     | 0.829 | 2.7E-24  | 8 | 0.829253 |
| P3H1     | 4.8E-71  | 0.631237 | 0.889 | 0.12  | 1.61E-66 | 8 | 0.121886 |
| P3H4     | 1.06E-11 | 0.337177 | 0.815 | 0.368 | 3.56E-07 | 8 | 0.36875  |



|         |          |          |       |       |          |   |          |
|---------|----------|----------|-------|-------|----------|---|----------|
| P4HA1   | 3.82E-26 | 0.575194 | 0.796 | 0.236 | 1.28E-21 | 8 | 0.237198 |
| P4HA2   | 1.7E-150 | 0.614663 | 0.778 | 0.044 | 5.6E-146 | 8 | 0.045627 |
| P4HB    | 1.73E-33 | 1.285412 | 0.981 | 0.778 | 5.82E-29 | 8 | 0.778011 |
| PALLD   | 5.97E-06 | 0.305775 | 0.926 | 0.575 | 0.200166 | 8 | 0.575601 |
| PALMD   | 3.88E-26 | 0.321382 | 0.407 | 0.061 | 1.3E-21  | 8 | 0.061903 |
| PARVA   | 2.78E-21 | 0.333327 | 0.5   | 0.106 | 9.34E-17 | 8 | 0.107032 |
| PCBD1   | 7.74E-17 | 0.493011 | 0.907 | 0.414 | 2.6E-12  | 8 | 0.414875 |
| PCDH18  | 1.63E-66 | 0.578446 | 0.796 | 0.098 | 5.45E-62 | 8 | 0.099641 |
| PCDH7   | 5.94E-47 | 0.316768 | 0.63  | 0.079 | 1.99E-42 | 8 | 0.080523 |
| PCOLCE  | 1.6E-229 | 1.22045  | 0.926 | 0.043 | 5.5E-225 | 8 | 0.045059 |
| PCSK9   | 1.14E-57 | 0.430976 | 0.574 | 0.059 | 3.84E-53 | 8 | 0.060375 |
| PDGFRA  | 0        | 0.405016 | 0.63  | 0.009 | 0        | 8 | 0.010128 |
| PDGFRB  | 4.3E-215 | 1.470198 | 0.944 | 0.049 | 1.4E-210 | 8 | 0.050283 |
| PDIA3   | 2.22E-26 | 0.806084 | 1     | 0.759 | 7.45E-22 | 8 | 0.759959 |
| PDIA4   | 5.12E-25 | 0.563785 | 0.981 | 0.407 | 1.72E-20 | 8 | 0.408266 |
| PDIA6   | 4.78E-24 | 0.727846 | 1     | 0.918 | 1.6E-19  | 8 | 0.918589 |
| PDLIM2  | 1.1E-28  | 0.688858 | 0.944 | 0.355 | 3.69E-24 | 8 | 0.356455 |
| PDLIM4  | 1.19E-41 | 0.760047 | 0.907 | 0.237 | 4E-37    | 8 | 0.238264 |
| PDLIM7  | 9.98E-28 | 0.845407 | 1     | 0.699 | 3.35E-23 | 8 | 0.699584 |
| PDXK    | 5.03E-15 | 0.491247 | 0.926 | 0.495 | 1.69E-10 | 8 | 0.495718 |
| PELO    | 4.34E-21 | 0.396766 | 0.741 | 0.22  | 1.46E-16 | 8 | 0.220817 |
| PENK    | 3.09E-32 | 1.869578 | 0.611 | 0.127 | 1.04E-27 | 8 | 0.128283 |
| PFN1    | 2.35E-23 | 0.61649  | 1     | 0.954 | 7.89E-19 | 8 | 0.953662 |
| PGF     | 2.3E-221 | 0.968787 | 0.685 | 0.023 | 7.8E-217 | 8 | 0.024555 |
| PGLS    | 3.38E-08 | 0.318728 | 0.981 | 0.869 | 0.001132 | 8 | 0.869585 |
| PHLDA2  | 0        | 0.712832 | 0.574 | 0.007 | 0        | 8 | 0.00796  |
| PHLDB1  | 7.27E-16 | 0.297839 | 0.704 | 0.219 | 2.44E-11 | 8 | 0.220213 |
| PHLDB2  | 1.98E-83 | 0.356397 | 0.593 | 0.044 | 6.64E-79 | 8 | 0.044597 |
| PID1    | 4.4E-107 | 0.285164 | 0.407 | 0.017 | 1.5E-102 | 8 | 0.01727  |
| PIGT    | 4.39E-10 | 0.287573 | 0.704 | 0.33  | 1.47E-05 | 8 | 0.330692 |
| PKDCC   | 4.25E-50 | 0.737229 | 0.833 | 0.16  | 1.43E-45 | 8 | 0.161188 |
| PLAC9   | 0        | 1.552819 | 0.981 | 0.026 | 0        | 8 | 0.02754  |
| PLAT    | 1.37E-90 | 1.123232 | 0.852 | 0.093 | 4.6E-86  | 8 | 0.094169 |
| PLD3    | 3.94E-19 | 0.600774 | 1     | 0.729 | 1.32E-14 | 8 | 0.729967 |
| PLIN3   | 4.63E-16 | 0.501897 | 0.907 | 0.445 | 1.55E-11 | 8 | 0.44604  |
| PLOD1   | 6.8E-122 | 0.573848 | 0.833 | 0.062 | 2.3E-117 | 8 | 0.063964 |
| PLOD3   | 1.87E-31 | 0.334758 | 0.704 | 0.142 | 6.27E-27 | 8 | 0.142888 |
| PLS3    | 2.37E-22 | 0.532118 | 0.87  | 0.344 | 7.96E-18 | 8 | 0.345084 |
| PLTP    | 1.25E-33 | 1.31682  | 0.926 | 0.397 | 4.2E-29  | 8 | 0.397925 |
| PLXDC1  | 5.1E-250 | 0.446135 | 0.537 | 0.012 | 1.7E-245 | 8 | 0.013255 |
| PLXDC2  | 5.58E-37 | 0.307525 | 0.667 | 0.109 | 1.87E-32 | 8 | 0.110337 |
| PMEPA1  | 4.49E-39 | 1.120915 | 1     | 0.42  | 1.51E-34 | 8 | 0.421023 |
| PMP22   | 1.52E-92 | 0.906565 | 0.889 | 0.099 | 5.1E-88  | 8 | 0.100743 |
| POSTN   | 0        | 2.046286 | 0.926 | 0.002 | 0        | 8 | 0.003376 |
| PPDPF   | 1.22E-21 | 0.559331 | 1     | 0.959 | 4.1E-17  | 8 | 0.958601 |
| PPFIBP1 | 2.25E-22 | 0.453965 | 0.796 | 0.243 | 7.54E-18 | 8 | 0.244128 |
| PIIB    | 9.67E-36 | 1.328723 | 1     | 0.878 | 3.24E-31 | 8 | 0.87854  |
| PPIC    | 9.8E-154 | 0.908567 | 0.87  | 0.057 | 3.3E-149 | 8 | 0.058953 |

|          |          |          |       |       |          |   |          |
|----------|----------|----------|-------|-------|----------|---|----------|
| PPP1R12A | 8.45E-06 | 0.282121 | 0.907 | 0.697 | 0.283259 | 8 | 0.697594 |
| PPP1R14A | 7.07E-33 | 0.421414 | 0.519 | 0.077 | 2.37E-28 | 8 | 0.078    |
| PQLC3    | 2.82E-85 | 0.278236 | 0.556 | 0.038 | 9.46E-81 | 8 | 0.038591 |
| PRADC1   | 1.11E-14 | 0.277934 | 0.722 | 0.245 | 3.73E-10 | 8 | 0.245514 |
| PRDX4    | 1.02E-16 | 0.587362 | 1     | 0.8   | 3.41E-12 | 8 | 0.800291 |
| PRDX5    | 5.56E-18 | 0.495255 | 1     | 0.972 | 1.86E-13 | 8 | 0.972211 |
| PRICKLE1 | 7.9E-144 | 0.886178 | 0.87  | 0.06  | 2.6E-139 | 8 | 0.061227 |
| PRRX1    | 1.1E-186 | 1.393942 | 1     | 0.065 | 3.7E-182 | 8 | 0.0667   |
| PRRX2    | 0        | 0.285779 | 0.407 | 0.003 | 0        | 8 | 0.004193 |
| PSAP     | 1.5E-08  | 0.31298  | 0.852 | 0.511 | 0.000504 | 8 | 0.51146  |
| PSAT1    | 4.97E-06 | 0.326382 | 0.926 | 0.709 | 0.166552 | 8 | 0.70957  |
| PSME2    | 3.68E-07 | 0.289542 | 0.833 | 0.522 | 0.012343 | 8 | 0.522227 |
| PTGIS    | 5.75E-65 | 0.299629 | 0.611 | 0.058 | 1.93E-60 | 8 | 0.059131 |
| PTK7     | 1.97E-31 | 0.702554 | 0.889 | 0.293 | 6.61E-27 | 8 | 0.294233 |
| PTN      | 1.38E-42 | 3.506199 | 1     | 0.473 | 4.62E-38 | 8 | 0.474041 |
| PTPN13   | 4.19E-22 | 0.395294 | 0.722 | 0.197 | 1.4E-17  | 8 | 0.198287 |
| PXDC1    | 1.68E-74 | 0.425247 | 0.611 | 0.053 | 5.64E-70 | 8 | 0.053836 |
| PXDN     | 3.36E-20 | 0.463742 | 0.907 | 0.379 | 1.13E-15 | 8 | 0.380441 |
| PYCR1    | 4.9E-14  | 0.475392 | 0.907 | 0.565 | 1.64E-09 | 8 | 0.566149 |
| QPRT     | 8.72E-67 | 1.009159 | 0.907 | 0.152 | 2.93E-62 | 8 | 0.15298  |
| RAB13    | 1.02E-23 | 0.813725 | 0.963 | 0.599 | 3.41E-19 | 8 | 0.600085 |
| RAB31    | 1.82E-81 | 0.302249 | 0.5   | 0.032 | 6.11E-77 | 8 | 0.033083 |
| RAB32    | 2E-80    | 0.530721 | 0.796 | 0.084 | 6.69E-76 | 8 | 0.084965 |
| RAB34    | 1.22E-35 | 0.756439 | 0.944 | 0.319 | 4.08E-31 | 8 | 0.320635 |
| RABAC1   | 9.56E-21 | 0.600156 | 1     | 0.92  | 3.21E-16 | 8 | 0.920365 |
| RAC1     | 8.66E-09 | 0.269944 | 1     | 0.975 | 0.00029  | 8 | 0.974805 |
| RALA     | 5.56E-08 | 0.378436 | 0.889 | 0.667 | 0.001865 | 8 | 0.667176 |
| RAMP2    | 2.83E-37 | 0.625553 | 0.87  | 0.202 | 9.5E-33  | 8 | 0.20344  |
| RAPGEF5  | 2.5E-21  | 0.326593 | 0.352 | 0.056 | 8.39E-17 | 8 | 0.056217 |
| RASL11B  | 3.22E-16 | 0.341152 | 0.648 | 0.198 | 1.08E-11 | 8 | 0.199105 |
| RASL12   | 0        | 0.307078 | 0.426 | 0     | 0        | 8 | 0.000924 |
| RBM3     | 2.25E-07 | 0.308152 | 0.944 | 0.883 | 0.007544 | 8 | 0.882733 |
| RBMS1    | 1.6E-108 | 0.58412  | 0.852 | 0.072 | 5.4E-104 | 8 | 0.073132 |
| RBMS3    | 1.4E-125 | 0.601408 | 0.778 | 0.053 | 4.7E-121 | 8 | 0.054724 |
| RBP1     | 1.89E-57 | 1.575436 | 0.944 | 0.201 | 6.34E-53 | 8 | 0.202658 |
| RCN1     | 2.5E-16  | 0.522906 | 1     | 0.739 | 8.37E-12 | 8 | 0.739846 |
| RCN3     | 5.2E-124 | 0.870017 | 0.759 | 0.053 | 1.7E-119 | 8 | 0.053872 |
| REEP3    | 3.64E-12 | 0.349272 | 0.796 | 0.347 | 1.22E-07 | 8 | 0.347927 |
| REEP5    | 9.37E-08 | 0.257287 | 0.852 | 0.488 | 0.003144 | 8 | 0.488575 |
| RER1     | 2.06E-16 | 0.531866 | 0.926 | 0.588 | 6.91E-12 | 8 | 0.588288 |
| REXO2    | 1.31E-18 | 0.436388 | 0.907 | 0.374 | 4.39E-14 | 8 | 0.37536  |
| RGCC     | 6.4E-181 | 0.309928 | 0.259 | 0.004 | 2.2E-176 | 8 | 0.0043   |
| RHOA     | 1.17E-16 | 0.515974 | 1     | 0.853 | 3.93E-12 | 8 | 0.853488 |
| RHOBTB3  | 2.42E-15 | 0.597799 | 0.944 | 0.703 | 8.13E-11 | 8 | 0.70392  |
| RHOC     | 9.97E-40 | 1.242049 | 0.981 | 0.434 | 3.34E-35 | 8 | 0.434953 |
| RHOJ     | 0        | 0.440208 | 0.704 | 0.016 | 0        | 8 | 0.017306 |
| RNF181   | 6.85E-08 | 0.262608 | 0.907 | 0.613 | 0.002298 | 8 | 0.613802 |
| RNF7     | 7.28E-07 | 0.268971 | 0.963 | 0.873 | 0.024406 | 8 | 0.872855 |

|          |          |          |       |       |          |   |          |
|----------|----------|----------|-------|-------|----------|---|----------|
| RNH1     | 6.62E-09 | 0.308031 | 0.963 | 0.763 | 0.000222 | 8 | 0.763868 |
| ROBO1    | 1.18E-15 | 0.296655 | 0.648 | 0.203 | 3.96E-11 | 8 | 0.203653 |
| ROR1     | 3.9E-31  | 0.406597 | 0.722 | 0.156 | 1.31E-26 | 8 | 0.157102 |
| RORA     | 1.03E-29 | 0.371657 | 0.704 | 0.154 | 3.45E-25 | 8 | 0.155076 |
| RPL10    | 1.38E-17 | 0.371579 | 1     | 1     | 4.64E-13 | 8 | 0.999538 |
| RPL12    | 7.92E-11 | 0.317402 | 1     | 0.996 | 2.65E-06 | 8 | 0.99634  |
| RPL15    | 3.4E-11  | 0.251602 | 1     | 0.999 | 1.14E-06 | 8 | 0.998792 |
| RPL22L1  | 1.14E-14 | 0.649862 | 0.889 | 0.608 | 3.84E-10 | 8 | 0.608223 |
| RPL28    | 6.42E-19 | 0.38841  | 1     | 0.998 | 2.15E-14 | 8 | 0.998117 |
| RPL36AL  | 4.19E-08 | 0.282926 | 1     | 0.964 | 0.001405 | 8 | 0.963932 |
| RPLP1    | 1.89E-10 | 0.28591  | 1     | 0.999 | 6.34E-06 | 8 | 0.998969 |
| RPS12    | 3.43E-14 | 0.353259 | 1     | 0.998 | 1.15E-09 | 8 | 0.998436 |
| RPS18    | 2.03E-25 | 0.518618 | 1     | 0.999 | 6.8E-21  | 8 | 0.999041 |
| RPS4X    | 4.99E-09 | 0.318787 | 1     | 0.998 | 0.000168 | 8 | 0.998436 |
| RRAGA    | 8.43E-08 | 0.259184 | 0.889 | 0.626 | 0.002829 | 8 | 0.626204 |
| RRAS     | 1.46E-71 | 0.847966 | 0.889 | 0.131 | 4.89E-67 | 8 | 0.132405 |
| RRBP1    | 1.58E-63 | 1.365255 | 1     | 0.228 | 5.3E-59  | 8 | 0.229772 |
| RSU1     | 7.61E-19 | 0.334952 | 0.667 | 0.193 | 2.55E-14 | 8 | 0.193525 |
| RTL8C    | 8E-14    | 0.389743 | 0.963 | 0.523 | 2.68E-09 | 8 | 0.524146 |
| S100A10  | 9.8E-111 | 1.038238 | 0.759 | 0.057 | 3.3E-106 | 8 | 0.058171 |
| S100A11  | 0        | 3.194687 | 1     | 0.033 | 0        | 8 | 0.03518  |
| S100A13  | 2.17E-37 | 0.614571 | 0.852 | 0.196 | 7.27E-33 | 8 | 0.197292 |
| S1PR3    | 2.5E-165 | 0.641868 | 0.704 | 0.033 | 8.3E-161 | 8 | 0.034682 |
| SAR1A    | 2.24E-11 | 0.331889 | 0.889 | 0.473 | 7.52E-07 | 8 | 0.474077 |
| SARS     | 7.21E-17 | 0.56551  | 0.944 | 0.729 | 2.42E-12 | 8 | 0.729896 |
| SAT1     | 2.81E-27 | 1.231654 | 0.889 | 0.436 | 9.44E-23 | 8 | 0.436907 |
| SCAMP2   | 4.18E-10 | 0.265553 | 0.796 | 0.353 | 1.4E-05  | 8 | 0.353968 |
| SCPEP1   | 3.53E-41 | 0.548845 | 0.889 | 0.196 | 1.18E-36 | 8 | 0.197257 |
| SCRG1    | 4.3E-93  | 1.070406 | 0.685 | 0.057 | 1.44E-88 | 8 | 0.058171 |
| SCX      | 1.72E-10 | 0.259754 | 0.241 | 0.052 | 5.76E-06 | 8 | 0.052095 |
| SDC2     | 2.02E-34 | 0.653521 | 0.907 | 0.242 | 6.77E-30 | 8 | 0.242884 |
| SEC13    | 2.77E-17 | 0.445222 | 0.907 | 0.399 | 9.28E-13 | 8 | 0.400377 |
| SEC23A   | 7.79E-16 | 0.33209  | 0.778 | 0.287 | 2.61E-11 | 8 | 0.287872 |
| SEC24D   | 9.7E-107 | 0.399266 | 0.759 | 0.057 | 3.3E-102 | 8 | 0.058136 |
| SEC31A   | 1.11E-16 | 0.477583 | 0.926 | 0.469 | 3.71E-12 | 8 | 0.470133 |
| SEC61A1  | 7.74E-19 | 0.431115 | 0.889 | 0.344 | 2.6E-14  | 8 | 0.345261 |
| SEC61B   | 1.34E-25 | 0.607385 | 1     | 0.961 | 4.51E-21 | 8 | 0.960769 |
| SEC61G   | 2.87E-08 | 0.29103  | 0.981 | 0.947 | 0.000964 | 8 | 0.94659  |
| SEC62    | 3.48E-10 | 0.311007 | 1     | 0.855 | 1.17E-05 | 8 | 0.855691 |
| SELENOF  | 2.51E-05 | 0.281136 | 0.907 | 0.661 | 0.84335  | 8 | 0.661455 |
| SELENOM  | 9.9E-36  | 0.955921 | 1     | 0.486 | 3.32E-31 | 8 | 0.487403 |
| SELENOP  | 8.52E-24 | 0.352236 | 0.593 | 0.128 | 2.86E-19 | 8 | 0.128745 |
| SELENOS  | 8.33E-06 | 0.283339 | 0.889 | 0.658 | 0.279314 | 8 | 0.658292 |
| SEMA5A   | 1.2E-229 | 0.409547 | 0.611 | 0.017 | 4E-225   | 8 | 0.018336 |
| SERF2    | 1E-33    | 0.848357 | 1     | 0.987 | 3.35E-29 | 8 | 0.986923 |
| SERP1    | 8.55E-10 | 0.414493 | 0.926 | 0.783 | 2.87E-05 | 8 | 0.782844 |
| SERPINB6 | 3.5E-79  | 0.7087   | 0.889 | 0.115 | 1.17E-74 | 8 | 0.116343 |
| SERPINE1 | 0        | 0.552508 | 0.519 | 0.001 | 0        | 8 | 0.002097 |

|          |          |          |       |       |          |   |          |
|----------|----------|----------|-------|-------|----------|---|----------|
| SERPINE2 | 9.96E-11 | 0.363384 | 0.685 | 0.296 | 3.34E-06 | 8 | 0.296827 |
| SERPINH1 | 6.76E-73 | 1.766054 | 1     | 0.202 | 2.27E-68 | 8 | 0.203191 |
| SERTAD1  | 2.68E-23 | 0.319    | 0.648 | 0.156 | 8.99E-19 | 8 | 0.157137 |
| SFRP4    | 4.07E-91 | 0.669248 | 0.222 | 0.006 | 1.36E-86 | 8 | 0.006219 |
| SGCD     | 0        | 0.549607 | 0.648 | 0.01  | 0        | 8 | 0.011478 |
| SGCE     | 2.9E-10  | 0.252395 | 0.815 | 0.351 | 9.73E-06 | 8 | 0.352226 |
| SH3BGRL  | 3.44E-12 | 0.415348 | 0.981 | 0.733 | 1.15E-07 | 8 | 0.733805 |
| SH3BGRL3 | 1.22E-18 | 0.620495 | 1     | 0.848 | 4.08E-14 | 8 | 0.8483   |
| SH3GLB1  | 1.15E-12 | 0.355926 | 0.796 | 0.397 | 3.86E-08 | 8 | 0.397747 |
| SH3KBP1  | 1.01E-39 | 0.260295 | 0.593 | 0.082 | 3.38E-35 | 8 | 0.083366 |
| SHC1     | 1.5E-49  | 0.411799 | 0.704 | 0.102 | 5.04E-45 | 8 | 0.103124 |
| SHMT2    | 2.65E-12 | 0.359461 | 0.852 | 0.415 | 8.9E-08  | 8 | 0.416261 |
| SIL1     | 3.96E-34 | 0.435483 | 0.778 | 0.166 | 1.33E-29 | 8 | 0.167123 |
| SKIL     | 1E-14    | 0.372157 | 0.741 | 0.272 | 3.36E-10 | 8 | 0.273231 |
| SLC1A3   | 1.09E-32 | 0.708482 | 0.852 | 0.253 | 3.65E-28 | 8 | 0.254078 |
| SLC1A5   | 1.1E-23  | 0.556794 | 0.852 | 0.296 | 3.69E-19 | 8 | 0.297395 |
| SLC25A6  | 6.72E-16 | 0.431407 | 1     | 0.978 | 2.25E-11 | 8 | 0.977577 |
| SLC2A4RG | 4.31E-08 | 0.354879 | 0.889 | 0.552 | 0.001444 | 8 | 0.552148 |
| SLC39A13 | 1.69E-24 | 0.306485 | 0.704 | 0.169 | 5.68E-20 | 8 | 0.170499 |
| SLC39A7  | 3.36E-08 | 0.295999 | 0.852 | 0.531 | 0.001126 | 8 | 0.531253 |
| SLC3A2   | 8.61E-15 | 0.588613 | 0.926 | 0.77  | 2.89E-10 | 8 | 0.770228 |
| SLC6A1   | 8.73E-53 | 0.412397 | 0.426 | 0.036 | 2.93E-48 | 8 | 0.036708 |
| SLC7A11  | 0        | 0.637889 | 0.741 | 0.016 | 0        | 8 | 0.017839 |
| SLC9A1   | 4.33E-47 | 0.278268 | 0.444 | 0.042 | 1.45E-42 | 8 | 0.043247 |
| SLC9A3R1 | 6.71E-26 | 0.261922 | 0.611 | 0.126 | 2.25E-21 | 8 | 0.126683 |
| SMAD5    | 4.13E-11 | 0.389078 | 0.889 | 0.506 | 1.39E-06 | 8 | 0.506876 |
| SNAI2    | 0        | 0.782026 | 0.815 | 0.01  | 0        | 8 | 0.011265 |
| SNHG18   | 2.9E-190 | 0.658157 | 0.796 | 0.037 | 9.8E-186 | 8 | 0.038058 |
| SNX17    | 1.89E-09 | 0.327736 | 0.889 | 0.546 | 6.35E-05 | 8 | 0.54664  |
| SNX3     | 2.51E-08 | 0.317003 | 1     | 0.89  | 0.000841 | 8 | 0.890302 |
| SNX9     | 8.69E-15 | 0.25895  | 0.648 | 0.208 | 2.91E-10 | 8 | 0.209161 |
| SPARC    | 1.79E-41 | 2.243406 | 1     | 0.5   | 6E-37    | 8 | 0.500586 |
| SPATS2L  | 6.9E-41  | 1.14632  | 0.963 | 0.321 | 2.31E-36 | 8 | 0.32227  |
| SPON2    | 3.5E-123 | 0.712602 | 0.5   | 0.022 | 1.2E-118 | 8 | 0.023098 |
| SPRY1    | 2.41E-33 | 0.306831 | 0.481 | 0.066 | 8.07E-29 | 8 | 0.06638  |
| SPSB1    | 7.9E-132 | 0.258484 | 0.481 | 0.019 | 2.7E-127 | 8 | 0.019509 |
| SPTBN1   | 2.5E-14  | 0.403407 | 0.889 | 0.425 | 8.37E-10 | 8 | 0.426104 |
| SRA1     | 2.24E-09 | 0.350204 | 0.796 | 0.475 | 7.52E-05 | 8 | 0.475498 |
| SRM      | 2.11E-11 | 0.483829 | 0.926 | 0.829 | 7.09E-07 | 8 | 0.829395 |
| SRPX2    | 0        | 0.565877 | 0.685 | 0.002 | 0        | 8 | 0.002843 |
| SSBP4    | 1.46E-08 | 0.374411 | 0.944 | 0.721 | 0.00049  | 8 | 0.721367 |
| SSPN     | 2.6E-252 | 0.706355 | 0.87  | 0.033 | 8.8E-248 | 8 | 0.034505 |
| SSR1     | 8.27E-13 | 0.433755 | 0.815 | 0.433 | 2.77E-08 | 8 | 0.434171 |
| SSR2     | 4.27E-19 | 0.599046 | 0.981 | 0.937 | 1.43E-14 | 8 | 0.937245 |
| SSR3     | 3.23E-22 | 0.730907 | 0.963 | 0.644 | 1.08E-17 | 8 | 0.644149 |
| SSR4     | 1.05E-13 | 0.433816 | 0.981 | 0.911 | 3.52E-09 | 8 | 0.911553 |
| STARD13  | 6.8E-190 | 0.319199 | 0.519 | 0.015 | 2.3E-185 | 8 | 0.016026 |
| STEAP1B  | 0        | 0.263555 | 0.352 | 0.002 | 0        | 8 | 0.002594 |

|           |          |          |       |       |          |   |          |
|-----------|----------|----------|-------|-------|----------|---|----------|
| STRA6     | 4.67E-77 | 1.040555 | 0.926 | 0.135 | 1.57E-72 | 8 | 0.1361   |
| SUB1      | 7.88E-11 | 0.323501 | 1     | 0.978 | 2.64E-06 | 8 | 0.978537 |
| SURF4     | 1.45E-16 | 0.407593 | 0.833 | 0.352 | 4.87E-12 | 8 | 0.353328 |
| SVIL      | 1.43E-40 | 1.761037 | 1     | 0.455 | 4.81E-36 | 8 | 0.455812 |
| SYNGR1    | 2.24E-28 | 0.385241 | 0.759 | 0.178 | 7.53E-24 | 8 | 0.179382 |
| TACC1     | 1.44E-21 | 0.368226 | 0.741 | 0.202 | 4.83E-17 | 8 | 0.203156 |
| TAGLN     | 1.4E-256 | 2.666399 | 1     | 0.045 | 4.7E-252 | 8 | 0.047155 |
| TAGLN2    | 5.54E-33 | 0.732862 | 0.889 | 0.276 | 1.86E-28 | 8 | 0.276749 |
| TARS      | 7.89E-08 | 0.286759 | 0.852 | 0.54  | 0.002644 | 8 | 0.540848 |
| TCEA1     | 3.87E-05 | 0.317764 | 0.907 | 0.815 | 1        | 8 | 0.814754 |
| TCEAL8    | 1.19E-10 | 0.436135 | 0.87  | 0.675 | 4E-06    | 8 | 0.675633 |
| TCEAL9    | 2.9E-12  | 0.464878 | 0.981 | 0.76  | 9.72E-08 | 8 | 0.760741 |
| TFF3      | 0        | 0.723092 | 0.333 | 0.002 | 0        | 8 | 0.003092 |
| TFG       | 8.27E-06 | 0.256313 | 0.889 | 0.732 | 0.277415 | 8 | 0.731921 |
| TFPI      | 0        | 0.564487 | 0.685 | 0.006 | 0        | 8 | 0.006965 |
| TGFB1     | 8.8E-225 | 0.881823 | 0.852 | 0.037 | 3E-220   | 8 | 0.038094 |
| TGFB111   | 2.4E-165 | 0.990422 | 0.907 | 0.058 | 8.1E-161 | 8 | 0.059913 |
| TGFB2     | 9.4E-174 | 0.345771 | 0.5   | 0.015 | 3.1E-169 | 8 | 0.01624  |
| TGFB1     | 0        | 0.453571 | 0.407 | 0.004 | 0        | 8 | 0.004726 |
| THY1      | 6.86E-28 | 1.017323 | 0.907 | 0.381 | 2.3E-23  | 8 | 0.382112 |
| TIMP1     | 3.31E-48 | 2.218165 | 1     | 0.372 | 1.11E-43 | 8 | 0.37369  |
| TIMP2     | 3.11E-12 | 0.406228 | 0.87  | 0.475 | 1.04E-07 | 8 | 0.476067 |
| TIMP3     | 3.8E-149 | 1.520744 | 0.981 | 0.078 | 1.3E-144 | 8 | 0.079421 |
| TJP1      | 3.42E-19 | 0.570471 | 0.926 | 0.457 | 1.15E-14 | 8 | 0.458335 |
| TLE1      | 1.93E-09 | 0.441131 | 0.889 | 0.634 | 6.48E-05 | 8 | 0.634448 |
| TLN1      | 3.02E-25 | 0.660932 | 0.778 | 0.274 | 1.01E-20 | 8 | 0.275328 |
| TMBIM4    | 1.79E-07 | 0.265601 | 0.907 | 0.553 | 0.006011 | 8 | 0.553463 |
| TMED10    | 3.83E-12 | 0.414026 | 0.907 | 0.62  | 1.29E-07 | 8 | 0.620625 |
| TMED3     | 6.34E-12 | 0.364795 | 0.833 | 0.465 | 2.13E-07 | 8 | 0.465442 |
| TMED9     | 5.61E-19 | 0.639145 | 0.981 | 0.739 | 1.88E-14 | 8 | 0.738993 |
| TMEM141   | 1.34E-16 | 0.442382 | 0.889 | 0.423 | 4.5E-12  | 8 | 0.42351  |
| TMEM167A  | 3.29E-08 | 0.277697 | 0.963 | 0.731 | 0.001105 | 8 | 0.731566 |
| TMEM204   | 0        | 0.331223 | 0.463 | 0     | 0        | 8 | 0.001102 |
| TMEM214   | 5.28E-33 | 0.267213 | 0.63  | 0.108 | 1.77E-28 | 8 | 0.108525 |
| TMEM230   | 1.03E-07 | 0.294695 | 0.926 | 0.642 | 0.003455 | 8 | 0.64287  |
| TMEM263   | 5.79E-26 | 0.526939 | 0.833 | 0.267 | 1.94E-21 | 8 | 0.268221 |
| TMSB10    | 1.16E-22 | 0.782079 | 1     | 0.998 | 3.88E-18 | 8 | 0.998472 |
| TNC       | 1.14E-26 | 0.471173 | 0.463 | 0.078 | 3.81E-22 | 8 | 0.078569 |
| TNFAIP6   | 0        | 0.537244 | 0.63  | 0.001 | 0        | 8 | 0.002203 |
| TNFRSF12A | 1.56E-39 | 0.667251 | 0.574 | 0.083 | 5.23E-35 | 8 | 0.084325 |
| TNFRSF19  | 2.73E-38 | 0.488735 | 0.722 | 0.136 | 9.17E-34 | 8 | 0.136776 |
| TNFRSF1A  | 3.25E-65 | 0.65698  | 0.833 | 0.117 | 1.09E-60 | 8 | 0.118724 |
| TNN       | 0        | 0.258005 | 0.426 | 0     | 0        | 8 | 0.001102 |
| TNS2      | 3.18E-67 | 0.300105 | 0.519 | 0.041 | 1.07E-62 | 8 | 0.042038 |
| TP53I3    | 1.73E-29 | 0.455757 | 0.778 | 0.195 | 5.79E-25 | 8 | 0.1958   |
| TPM1      | 6.16E-36 | 2.138764 | 1     | 0.778 | 2.07E-31 | 8 | 0.778046 |
| TPM2      | 2.1E-201 | 1.955016 | 0.981 | 0.056 | 7.2E-197 | 8 | 0.057994 |
| TPM4      | 1.69E-36 | 1.437767 | 1     | 0.725 | 5.66E-32 | 8 | 0.725241 |



|         |          |          |       |       |          |   |          |
|---------|----------|----------|-------|-------|----------|---|----------|
| TPT1    | 1.04E-34 | 0.786559 | 1     | 0.998 | 3.49E-30 | 8 | 0.997903 |
| TRAM1   | 1.25E-15 | 0.349036 | 0.944 | 0.398 | 4.21E-11 | 8 | 0.39924  |
| TRIB3   | 1E-36    | 0.661755 | 0.593 | 0.102 | 3.35E-32 | 8 | 0.103266 |
| TRIL    | 7.57E-83 | 0.300926 | 0.519 | 0.034 | 2.54E-78 | 8 | 0.03486  |
| TRIO    | 9E-18    | 0.41868  | 0.833 | 0.295 | 3.02E-13 | 8 | 0.295796 |
| TRIOBP  | 5.98E-17 | 0.519084 | 0.889 | 0.413 | 2.01E-12 | 8 | 0.413773 |
| TSKU    | 1.34E-29 | 0.356412 | 0.741 | 0.163 | 4.48E-25 | 8 | 0.164529 |
| TSPO    | 1.86E-12 | 0.550894 | 0.944 | 0.711 | 6.24E-08 | 8 | 0.710991 |
| TUBA1C  | 2.17E-62 | 0.802557 | 0.852 | 0.126 | 7.28E-58 | 8 | 0.127465 |
| TUBB6   | 4.43E-21 | 0.558089 | 0.944 | 0.384 | 1.48E-16 | 8 | 0.384635 |
| TUSC3   | 5.98E-08 | 0.289508 | 0.944 | 0.677 | 0.002005 | 8 | 0.677126 |
| TWIST1  | 0        | 0.788703 | 0.815 | 0.006 | 0        | 8 | 0.007711 |
| TXN     | 3.63E-10 | 0.319961 | 1     | 0.975 | 1.22E-05 | 8 | 0.974983 |
| TXNDC17 | 2.63E-12 | 0.417551 | 1     | 0.808 | 8.83E-08 | 8 | 0.808536 |
| UACA    | 7.7E-16  | 0.442914 | 0.685 | 0.258 | 2.58E-11 | 8 | 0.258342 |
| UBE2E2  | 3.22E-14 | 0.258889 | 0.667 | 0.213 | 1.08E-09 | 8 | 0.214349 |
| UBE2H   | 2.94E-07 | 0.282149 | 0.796 | 0.478 | 0.009858 | 8 | 0.478981 |
| UFM1    | 1.46E-09 | 0.312976 | 0.833 | 0.427 | 4.89E-05 | 8 | 0.427632 |
| UNC5B   | 1.4E-139 | 0.602712 | 0.759 | 0.046 | 4.6E-135 | 8 | 0.046978 |
| USO1    | 8.44E-10 | 0.273344 | 0.759 | 0.353 | 2.83E-05 | 8 | 0.353328 |
| UXS1    | 5.21E-16 | 0.338195 | 0.778 | 0.284 | 1.75E-11 | 8 | 0.285242 |
| VAMP5   | 2.4E-116 | 0.604322 | 0.407 | 0.015 | 8.2E-112 | 8 | 0.01624  |
| VASN    | 1E-34    | 0.27085  | 0.407 | 0.048 | 3.35E-30 | 8 | 0.048257 |
| VCAN    | 1.37E-34 | 1.607032 | 1     | 0.778 | 4.59E-30 | 8 | 0.778437 |
| VCL     | 5.24E-24 | 0.481731 | 0.815 | 0.247 | 1.76E-19 | 8 | 0.247681 |
| VGLL4   | 7.17E-09 | 0.407432 | 0.889 | 0.623 | 0.00024  | 8 | 0.623077 |
| VIM     | 8.72E-08 | 0.380233 | 1     | 0.954 | 0.002923 | 8 | 0.953875 |
| VMP1    | 5.57E-11 | 0.315185 | 0.87  | 0.456 | 1.87E-06 | 8 | 0.456842 |
| WARS    | 1.71E-44 | 0.614768 | 0.778 | 0.143 | 5.73E-40 | 8 | 0.144167 |
| WASF2   | 8.04E-23 | 0.647941 | 0.944 | 0.48  | 2.7E-18  | 8 | 0.481326 |
| WDR1    | 4.73E-09 | 0.313978 | 0.815 | 0.42  | 0.000159 | 8 | 0.421129 |
| WDR41   | 1.1E-13  | 0.347024 | 0.778 | 0.314 | 3.69E-09 | 8 | 0.314843 |
| WDR45   | 4.73E-16 | 0.346756 | 0.759 | 0.264 | 1.59E-11 | 8 | 0.264454 |
| WIPI1   | 1.2E-130 | 0.73839  | 0.833 | 0.06  | 4E-126   | 8 | 0.061547 |
| WLS     | 6.65E-32 | 0.654194 | 0.889 | 0.249 | 2.23E-27 | 8 | 0.249991 |
| WNT4    | 8.4E-20  | 0.258507 | 0.204 | 0.022 | 2.82E-15 | 8 | 0.022139 |
| WWTR1   | 1.5E-170 | 0.714906 | 0.833 | 0.046 | 4.9E-166 | 8 | 0.047084 |
| XBP1    | 1.17E-24 | 0.667393 | 0.889 | 0.368 | 3.93E-20 | 8 | 0.368501 |
| XPNPEP1 | 2.22E-23 | 0.389022 | 0.926 | 0.294 | 7.45E-19 | 8 | 0.29473  |
| YARS    | 4.06E-12 | 0.283079 | 0.833 | 0.357 | 1.36E-07 | 8 | 0.35777  |
| YBX3    | 5.45E-09 | 0.386871 | 0.87  | 0.583 | 0.000183 | 8 | 0.58317  |
| YIF1A   | 2.43E-25 | 0.753133 | 0.963 | 0.578 | 8.16E-21 | 8 | 0.578729 |
| YIPF5   | 1.56E-12 | 0.372543 | 0.833 | 0.382 | 5.24E-08 | 8 | 0.382858 |
| ZCCHC24 | 5.2E-227 | 0.723883 | 0.833 | 0.034 | 1.7E-222 | 8 | 0.0355   |
| ZEB1    | 6.76E-35 | 1.147392 | 0.963 | 0.435 | 2.27E-30 | 8 | 0.435876 |
| ZFH3    | 8.06E-20 | 0.384651 | 0.852 | 0.285 | 2.7E-15  | 8 | 0.285882 |
| ZFP36L1 | 1.11E-15 | 0.682593 | 0.963 | 0.69  | 3.73E-11 | 8 | 0.690807 |
| ZIC1    | 2.6E-129 | 0.836946 | 0.87  | 0.065 | 8.7E-125 | 8 | 0.066202 |



|        |          |          |       |       |          |   |          |
|--------|----------|----------|-------|-------|----------|---|----------|
| ZNF703 | 1.65E-20 | 0.324257 | 0.63  | 0.159 | 5.54E-16 | 8 | 0.159945 |
| ZYX    | 4.34E-32 | 0.647273 | 0.889 | 0.267 | 1.46E-27 | 8 | 0.268221 |
