# Supplementary material
Source: PubMed Central journal article supplement (PMC8761390)
Supplement: NIHMS1710729-supplement-9.pdf [file NIHMS1710729-supplement-9.pdf]

**Suppl. Table 4. Effect of MeHg exposure on cell cycle regulatory gene expression.**

Genes involved in cell cycle regulation showing significant (FDR 0.05) MeHg-induced expression changes are highlighted in green and fold changes indicated (upregulated genes >1, down-regulated genes < 1).

| <b>E 0.1 vs 0</b>   | <b>protein</b> | <b>gene</b> | <b>cluster 0</b> | <b>cluster 1</b> | <b>cluster 5</b> | <b>cluster 2</b> | <b>cluster 3</b> | <b>cluster 4</b> |
|---------------------|----------------|-------------|------------------|------------------|------------------|------------------|------------------|------------------|
|                     | p21            | CDKN1A      | no               | no               | no               | no               | no               | no               |
|                     | p16            | CDKN2A      | no               | no               | no               | no               | no               | no               |
|                     | cyclin E1      | CCNE1       | no               | no               | no               | no               | no               | no               |
|                     | cyclin E2      | CCNE2       | no               | no               | no               | no               | no               | no               |
|                     | Cdk2           | CDK2        | no               | no               | no               | no               | no               | no               |
|                     |                |             |                  |                  |                  |                  |                  |                  |
| <b>E 1.0 vs 0</b>   | <b>protein</b> | <b>gene</b> | <b>cluster 0</b> | <b>cluster 1</b> | <b>cluster 5</b> | <b>cluster 2</b> | <b>cluster 3</b> | <b>cluster 4</b> |
|                     | p21            | CDKN1A      | no               | 0.77             | no               | no               | no               | no               |
|                     | p16            | CDKN2A      | no               | no               | no               | no               | no               | no               |
|                     | cyclin E1      | CCNE1       | no               | no               | no               | no               | no               | no               |
|                     | cyclin E2      | CCNE2       | no               | no               | no               | no               | no               | no               |
|                     | Cdk2           | CDK2        | no               | no               | no               | no               | no               | no               |
|                     |                |             |                  |                  |                  |                  |                  |                  |
| <b>E+L 0.1 vs 0</b> | <b>protein</b> | <b>gene</b> | <b>cluster 0</b> | <b>cluster 1</b> | <b>cluster 5</b> | <b>cluster 2</b> | <b>cluster 3</b> | <b>cluster 4</b> |
|                     | p21            | CDKN1A      | no               | no               | no               | no               | no               | no               |
|                     | p16            | CDKN2A      | no               | no               | no               | no               | no               | no               |
|                     | cyclin E1      | CCNE1       | no               | no               | no               | no               | no               | no               |
|                     | cyclin E2      | CCNE2       | no               | no               | no               | no               | no               | no               |
|                     | Cdk2           | CDK2        | no               | no               | no               | no               | no               | no               |
|                     |                |             |                  |                  |                  |                  |                  |                  |
| <b>E+L 1.0 vs 0</b> | <b>protein</b> | <b>gene</b> | <b>cluster 0</b> | <b>cluster 1</b> | <b>cluster 5</b> | <b>cluster 2</b> | <b>cluster 3</b> | <b>cluster 4</b> |
|                     | p21            | CDKN1A      | no               | 0.75             | no               | no               | no               | no               |
|                     | p16            | CDKN2A      | no               | no               | no               | no               | no               | no               |
|                     | cyclin E1      | CCNE1       | 0.86             | no               | no               | no               | no               | no               |
|                     | cyclin E2      | CCNE2       | no               | no               | no               | no               | no               | no               |
|                     | Cdk2           | CDK2        | no               | 1.21             | no               | no               | no               | no               |
