# Supplementary material
Source: PubMed Central journal article supplement (PMC8761390)
Supplement: NIHMS1710729-supplement-10.pdf [file NIHMS1710729-supplement-10.pdf]

Neely, 2021, suppl. Table 5C: cluster 5 at E 0.1  $\mu$ M

| GO biological process complete                                                                               | Homo sapiens (REF) | #     | expected | Fold Enrichment | upload 1 (▼ Hierarchy, NEW! ?) | +/- | raw P-value | FDR      |
|--------------------------------------------------------------------------------------------------------------|--------------------|-------|----------|-----------------|--------------------------------|-----|-------------|----------|
| mitochondrial ATP synthase coupled proton transport                                                          |                    | 19    | 5        | .21             | 24.20                          | +   | 4.96E-06    | 6.69E-04 |
| ↳ATP synthase coupled proton transport                                                                       |                    | 24    | 5        | .26             | 19.15                          | +   | 1.33E-05    | 1.66E-03 |
| ↳ATP biosynthetic process                                                                                    |                    | 36    | 5        | .39             | 12.77                          | +   | 7.54E-05    | 8.31E-03 |
| ↳↳organic cyclic compound metabolic process                                                                  |                    | 3190  | 89       | 34.70           | 2.57                           | +   | 3.34E-18    | 2.40E-15 |
| ↳↳organic substance metabolic process                                                                        |                    | 7879  | 122      | 85.70           | 1.42                           | +   | 1.12E-06    | 1.63E-04 |
| ↳↳metabolic process                                                                                          |                    | 8334  | 141      | 90.64           | 1.56                           | +   | 2.47E-11    | 6.60E-09 |
| ↳↳organic substance biosynthetic process                                                                     |                    | 2804  | 63       | 30.50           | 2.07                           | +   | 1.42E-08    | 2.58E-06 |
| ↳↳biosynthetic process                                                                                       |                    | 2862  | 63       | 31.13           | 2.02                           | +   | 3.28E-08    | 5.82E-06 |
| ↳↳heterocycle metabolic process                                                                              |                    | 2904  | 89       | 31.59           | 2.82                           | +   | 7.61E-21    | 1.00E-17 |
| ↳↳cellular metabolic process                                                                                 |                    | 7521  | 141      | 82.35           | 1.71                           | +   | 4.48E-15    | 1.77E-12 |
| ↳↳cellular process                                                                                           |                    | 15487 | 205      | 168.44          | 1.22                           | +   | 6.22E-10    | 1.31E-07 |
| ↳↳cellular biosynthetic process                                                                              |                    | 2709  | 62       | 29.46           | 2.10                           | +   | 1.35E-08    | 2.48E-06 |
| ↳↳cellular nitrogen compound biosynthetic process                                                            |                    | 1575  | 51       | 17.13           | 2.98                           | +   | 2.43E-12    | 7.82E-10 |
| ↳↳cellular nitrogen compound metabolic process                                                               |                    | 3407  | 99       | 37.06           | 2.67                           | +   | 5.56E-22    | 1.10E-18 |
| ↳↳nitrogen compound metabolic process                                                                        |                    | 6898  | 121      | 75.03           | 1.61                           | +   | 3.74E-10    | 8.20E-08 |
| ↳↳cellular aromatic compound metabolic process                                                               |                    | 2949  | 89       | 32.07           | 2.77                           | +   | 2.09E-20    | 2.36E-17 |
| ↳↳organonitrogen compound biosynthetic process                                                               |                    | 1380  | 48       | 15.01           | 3.20                           | +   | 1.06E-12    | 3.56E-10 |
| ↳↳nucleobase-containing compound metabolic process                                                           |                    | 2720  | 89       | 29.58           | 3.01                           | +   | 9.66E-23    | 3.05E-19 |
| ↳↳↳primary metabolic process                                                                                 |                    | 7365  | 122      | 80.10           | 1.52                           | +   | 1.51E-08    | 2.71E-06 |
| ↳ATP metabolic process                                                                                       |                    | 206   | 23       | 2.24            | 10.27                          | +   | 5.77E-16    | 2.93E-13 |
| ↳purine ribonucleoside triphosphate biosynthetic process                                                     |                    | 47    | 6        | .51             | 11.74                          | +   | 2.18E-05    | 2.67E-03 |
| ↳purine nucleoside triphosphate biosynthetic process                                                         |                    | 48    | 6        | .52             | 11.49                          | +   | 2.43E-05    | 2.95E-03 |
| ↳nucleoside triphosphate biosynthetic process                                                                |                    | 65    | 6        | .71             | 8.49                           | +   | 1.16E-04    | 1.25E-02 |
| ↳purine nucleoside triphosphate metabolic process                                                            |                    | 67    | 6        | .73             | 8.23                           | +   | 1.35E-04    | 1.41E-02 |
| ↳ribonucleoside triphosphate biosynthetic process                                                            |                    | 53    | 6        | .58             | 10.41                          | +   | 4.06E-05    | 4.75E-03 |
| ↳ribonucleoside triphosphate metabolic process                                                               |                    | 68    | 6        | .74             | 8.11                           | +   | 1.46E-04    | 1.49E-02 |
| ↳purine ribonucleoside triphosphate metabolic process                                                        |                    | 61    | 6        | .66             | 9.04                           | +   | 8.38E-05    | 9.11E-03 |
| ↳energy coupled proton transport, down electrochemical gradient                                              |                    | 24    | 5        | .26             | 19.15                          | +   | 1.33E-05    | 1.65E-03 |
| ↳proton transmembrane transport                                                                              |                    | 134   | 10       | 1.46            | 6.86                           | +   | 3.72E-06    | 5.10E-04 |
| ↳↳ion transport                                                                                              |                    | 2882  | 57       | 31.35           | 1.82                           | +   | 6.76E-06    | 8.74E-04 |
| ↳↳transport                                                                                                  |                    | 4502  | 73       | 48.97           | 1.49                           | +   | 2.39E-04    | 2.40E-02 |
| ↳↳establishment of localization                                                                              |                    | 4653  | 75       | 50.61           | 1.48                           | +   | 2.09E-04    | 2.11E-02 |
| ↳↳localization                                                                                               |                    | 5805  | 89       | 63.14           | 1.41                           | +   | 2.39E-04    | 2.39E-02 |
| ↳oxidative phosphorylation                                                                                   |                    | 120   | 20       | 1.31            | 15.32                          | +   | 4.87E-17    | 3.20E-14 |
| ↳generation of precursor metabolites and energy                                                              |                    | 402   | 24       | 4.37            | 5.49                           | +   | 4.08E-11    | 1.06E-08 |
| ↳phosphorylation                                                                                             |                    | 1023  | 29       | 11.13           | 2.61                           | +   | 3.26E-06    | 4.55E-04 |
| ↳intracellular transport                                                                                     |                    | 1500  | 49       | 16.31           | 3.00                           | +   | 5.35E-12    | 1.65E-09 |
| ↳establishment of localization in cell                                                                       |                    | 2365  | 55       | 25.72           | 2.14                           | +   | 7.66E-08    | 1.29E-05 |
| ↳cellular localization                                                                                       |                    | 3006  | 65       | 32.69           | 1.99                           | +   | 3.64E-08    | 6.38E-06 |
| ↳mitochondrial transmembrane transport                                                                       |                    | 105   | 11       | 1.14            | 9.63                           | +   | 5.11E-08    | 8.76E-06 |
| ↳mitochondrial transport                                                                                     |                    | 229   | 18       | 2.49            | 7.23                           | +   | 2.08E-10    | 4.82E-08 |
| SRP-dependent cotranslational protein targeting to membrane                                                  |                    | 96    | 21       | 1.04            | 20.11                          | +   | 5.69E-20    | 5.61E-17 |
| ↳protein targeting to ER                                                                                     |                    | 111   | 23       | 1.21            | 19.05                          | +   | 2.63E-21    | 4.61E-18 |
| ↳protein targeting                                                                                           |                    | 370   | 33       | 4.02            | 8.20                           | +   | 9.65E-20    | 8.95E-17 |
| ↳↳intracellular protein transport                                                                            |                    | 974   | 39       | 10.59           | 3.68                           | +   | 3.57E-12    | 1.13E-09 |
| ↳↳cellular protein localization                                                                              |                    | 1643  | 49       | 17.87           | 2.74                           | +   | 1.21E-10    | 2.94E-08 |
| ↳↳cellular macromolecule localization                                                                        |                    | 1649  | 49       | 17.94           | 2.73                           | +   | 1.37E-10    | 3.23E-08 |
| ↳↳macromolecule localization                                                                                 |                    | 2553  | 52       | 27.77           | 1.87                           | +   | 9.19E-06    | 1.17E-03 |
| ↳↳protein localization                                                                                       |                    | 2161  | 51       | 23.50           | 2.17                           | +   | 1.43E-07    | 2.33E-05 |
| ↳protein transport                                                                                           |                    | 1464  | 40       | 15.92           | 2.51                           | +   | 1.34E-07    | 2.20E-05 |
| ↳establishment of protein localization                                                                       |                    | 1559  | 41       | 16.96           | 2.42                           | +   | 1.76E-07    | 2.83E-05 |
| ↳peptide transport                                                                                           |                    | 1493  | 40       | 16.24           | 2.46                           | +   | 1.79E-07    | 2.84E-05 |
| ↳amide transport                                                                                             |                    | 1527  | 40       | 16.61           | 2.41                           | +   | 2.81E-07    | 4.30E-05 |
| ↳nitrogen compound transport                                                                                 |                    | 1802  | 41       | 19.60           | 2.09                           | +   | 7.72E-06    | 9.90E-04 |
| ↳establishment of protein localization to endoplasmic reticulum                                              |                    | 115   | 23       | 1.25            | 18.39                          | +   | 5.30E-21    | 7.60E-18 |
| ↳protein localization to endoplasmic reticulum                                                               |                    | 142   | 24       | 1.54            | 15.54                          | +   | 2.35E-20    | 2.47E-17 |
| ↳↳protein localization to organelle                                                                          |                    | 791   | 40       | 8.60            | 4.65                           | +   | 1.28E-15    | 6.10E-13 |
| ↳↳establishment of protein localization to organelle                                                         |                    | 449   | 31       | 4.88            | 6.35                           | +   | 1.11E-15    | 5.49E-13 |
| ↳cotranslational protein targeting to membrane                                                               |                    | 101   | 22       | 1.10            | 20.03                          | +   | 7.77E-21    | 9.43E-18 |
| ↳protein targeting to membrane                                                                               |                    | 183   | 25       | 1.99            | 12.56                          | +   | 3.70E-19    | 3.07E-16 |
| ↳establishment of protein localization to membrane                                                           |                    | 307   | 27       | 3.34            | 8.09                           | +   | 3.64E-16    | 1.92E-13 |
| ↳protein localization to membrane                                                                            |                    | 537   | 28       | 5.84            | 4.79                           | +   | 1.81E-11    | 4.93E-09 |
| cytoplasmic translation                                                                                      |                    | 75    | 15       | .82             | 18.39                          | +   | 4.20E-14    | 1.44E-11 |
| ↳translation                                                                                                 |                    | 384   | 33       | 4.18            | 7.90                           | +   | 2.75E-19    | 2.41E-16 |
| ↳peptide biosynthetic process                                                                                |                    | 409   | 33       | 4.45            | 7.42                           | +   | 1.61E-18    | 1.27E-15 |
| ↳peptide metabolic process                                                                                   |                    | 537   | 33       | 5.84            | 5.65                           | +   | 2.93E-15    | 1.19E-12 |
| ↳cellular amide metabolic process                                                                            |                    | 808   | 33       | 8.79            | 3.76                           | +   | 1.24E-10    | 2.97E-08 |
| ↳amide biosynthetic process                                                                                  |                    | 528   | 33       | 5.74            | 5.75                           | +   | 1.85E-15    | 8.12E-13 |
| ↳gene expression                                                                                             |                    | 2187  | 82       | 23.79           | 3.45                           | +   | 2.14E-24    | 8.45E-21 |
| ↳macromolecule metabolic process                                                                             |                    | 6194  | 111      | 67.37           | 1.65                           | +   | 1.82E-09    | 3.60E-07 |
| ↳cellular macromolecule biosynthetic process                                                                 |                    | 1655  | 51       | 18.00           | 2.83                           | +   | 1.44E-11    | 3.99E-09 |
| ↳cellular macromolecule metabolic process                                                                    |                    | 4964  | 78       | 53.99           | 1.44                           | +   | 3.86E-04    | 3.69E-02 |
| ↳macromolecule biosynthetic process                                                                          |                    | 1696  | 51       | 18.45           | 2.76                           | +   | 3.43E-11    | 9.02E-09 |
| ↳cellular protein metabolic process                                                                          |                    | 3644  | 66       | 39.63           | 1.67                           | +   | 2.05E-05    | 2.52E-03 |
| mitochondrial electron transport, cytochrome c to oxygen                                                     |                    | 20    | 4        | .22             | 18.39                          | +   | 1.17E-04    | 1.28E-02 |
| ↳mitochondrial ATP synthase coupled electron transport                                                       |                    | 89    | 14       | .97             | 14.46                          | +   | 5.48E-12    | 1.66E-09 |
| ↳ATP synthase coupled electron transport                                                                     |                    | 90    | 14       | .98             | 14.30                          | +   | 6.27E-12    | 1.87E-09 |
| ↳↳respiratory electron transport chain                                                                       |                    | 108   | 14       | 1.17            | 11.92                          | +   | 5.69E-11    | 1.45E-08 |
| ↳↳electron transport chain                                                                                   |                    | 170   | 15       | 1.85            | 8.11                           | +   | 1.62E-09    | 3.24E-07 |
| ↳↳cellular respiration                                                                                       |                    | 157   | 14       | 1.71            | 8.20                           | +   | 5.08E-09    | 9.76E-07 |
| ↳energy derivation by oxidation of organic compounds                                                         |                    | 227   | 14       | 2.47            | 5.67                           | +   | 3.75E-07    | 5.69E-05 |
| ↳aerobic electron transport chain                                                                            |                    | 20    | 4        | .22             | 18.39                          | +   | 1.17E-04    | 1.24E-02 |
| protein import into mitochondrial matrix                                                                     |                    | 20    | 4        | .22             | 18.39                          | +   | 1.17E-04    | 1.25E-02 |
| ↳intracellular protein transmembrane transport                                                               |                    | 51    | 6        | .55             | 10.82                          | +   | 3.33E-05    | 3.92E-03 |
| ↳protein transmembrane transport                                                                             |                    | 60    | 6        | .65             | 9.19                           | +   | 7.69E-05    | 8.43E-03 |
| ↳establishment of protein localization to mitochondrion                                                      |                    | 75    | 7        | .82             | 8.58                           | +   | 2.91E-05    | 3.46E-03 |
| ↳protein localization to mitochondrion                                                                       |                    | 82    | 8        | .89             | 8.97                           | +   | 5.76E-06    | 7.57E-04 |
| ↳protein targeting to mitochondrion                                                                          |                    | 56    | 7        | .61             | 11.49                          | +   | 5.04E-06    | 6.74E-04 |
| ↳mitochondrion organization                                                                                  |                    | 457   | 31       | 4.97            | 6.24                           | +   | 1.76E-15    | 7.91E-13 |
| ↳organelle organization                                                                                      |                    | 3574  | 71       | 38.87           | 1.83                           | +   | 1.97E-07    | 3.08E-05 |
| ↳cellular component organization                                                                             |                    | 5776  | 100      | 62.82           | 1.59                           | +   | 1.88E-07    | 2.97E-05 |
| ↳cellular component organization or biogenesis                                                               |                    | 6000  | 123      | 65.26           | 1.88                           | +   | 1.70E-15    | 7.87E-13 |
| cristae formation                                                                                            |                    | 31    | 6        | .34             | 17.80                          | +   | 2.55E-06    | 3.63E-04 |
| ↳inner mitochondrial membrane organization                                                                   |                    | 52    | 8        | .57             | 14.14                          | +   | 2.51E-07    | 3.88E-05 |
| ↳mitochondrial membrane organization                                                                         |                    | 140   | 12       | 1.52            | 7.88                           | +   | 9.70E-08    | 1.61E-05 |
| ribosomal small subunit assembly                                                                             |                    | 21    | 4        | .23             | 17.51                          | +   | 1.38E-04    | 1.42E-02 |
| ↳cellular component assembly                                                                                 |                    | 2438  | 51       | 26.52           | 1.92                           | +   | 5.87E-06    | 7.65E-04 |
| ↳cellular component biogenesis                                                                               |                    | 2701  | 75       | 29.38           | 2.55                           | +   | 7.14E-15    | 2.75E-12 |
| ↳ribosome biogenesis                                                                                         |                    | 332   | 28       | 3.61            | 7.75                           | +   | 2.70E-16    | 1.47E-13 |
| ↳ribonucleoprotein complex biogenesis                                                                        |                    | 465   | 39       | 5.06            | 7.71                           | +   | 2.40E-22    | 5.41E-19 |
| ↳ribosomal small subunit biogenesis                                                                          |                    | 75    | 7        | .82             | 8.58                           | +   | 2.91E-05    | 3.48E-03 |
| ↳ribonucleoprotein complex assembly                                                                          |                    | 190   | 15       | 2.07            | 7.26                           | +   | 6.63E-09    | 1.25E-06 |
| ↳ribonucleoprotein complex subunit organization                                                              |                    | 197   | 16       | 2.14            | 7.47                           | +   | 1.40E-09    | 2.87E-07 |
| ↳protein-containing complex subunit organization                                                             |                    | 1582  | 44       | 17.21           | 2.56                           | +   | 1.04E-08    | 1.92E-06 |
| ↳cellular protein-containing complex assembly                                                                |                    | 860   | 32       | 9.35            | 3.42                           | +   | 2.24E-09    | 4.36E-07 |
| ↳protein-containing complex assembly                                                                         |                    | 1338  | 38       | 14.55           | 2.61                           | +   | 7.45E-08    | 1.26E-05 |
| translational initiation                                                                                     |                    | 143   | 26       | 1.56            | 16.72                          | +   | 1.10E-22    | 2.90E-19 |
| nuclear-transcribed mRNA catabolic process, nonsense-mediated decay                                          |                    | 120   | 21       | 1.31            | 16.09                          | +   | 3.22E-18    | 2.42E-15 |
| ↳nuclear-transcribed mRNA catabolic process                                                                  |                    | 196   | 22       | 2.13            | 10.32                          | +   | 2.31E-15    | 9.59E-13 |
| ↳mRNA catabolic process                                                                                      |                    | 216   | 22       | 2.35            | 9.36                           | +   | 1.45E-14    | 5.45E-12 |
| ↳negative regulation of gene expression                                                                      |                    | 2034  | 48       | 22.12           | 2.17                           | +   | 4.25E-07    | 6.38E-05 |
| ↳negative regulation of macromolecule metabolic process                                                      |                    | 2862  | 60       | 31.13           | 1.93                           | +   | 5.08E-07    | 7.56E-05 |
| ↳negative regulation of metabolic process                                                                    |                    | 3105  | 63       | 33.77           | 1.87                           | +   | 7.62E-07    | 1.12E-04 |
| ↳regulation of metabolic process                                                                             |                    | 6854  | 104      | 74.55           | 1.40                           | +   | 6.01E-05    | 6.82E-03 |
| ↳regulation of macromolecule metabolic process                                                               |                    | 6308  | 98       | 68.61           | 1.43                           | +   | 4.14E-05    | 4.80E-03 |
| ↳regulation of gene expression                                                                               |                    | 4880  | 84       | 53.08           | 1.58                           | +   | 4.13E-06    | 5.61E-04 |
| ↳RNA catabolic process                                                                                       |                    | 246   | 23       | 2.68            | 8.60                           | +   | 1.92E-14    | 7.03E-12 |
| ↳RNA metabolic process                                                                                       |                    | 1599  | 72       | 17.39           | 4.14                           | +   | 1.31E-25    | 6.88E-22 |
| ↳nucleic acid metabolic process                                                                              |                    | 2232  | 78       | 24.28           | 3.21                           | +   | 3.17E-21    | 5.00E-18 |
| ↳cellular macromolecule catabolic process                                                                    |                    | 912   | 27       | 9.92            | 2.72                           | +   | 3.38E-06    | 4.68E-04 |
| ↳macromolecule catabolic process                                                                             |                    | 1046  | 27       | 11.38           | 2.37                           | +   | 4.33E-05    | 4.99E-03 |
| ↳nucleobase-containing compound catabolic process                                                            |                    | 375   | 24       | 4.08            | 5.88                           | +   | 1.04E-11    | 2.94E-09 |
| ↳cellular nitrogen compound catabolic process                                                                |                    | 425   | 24       | 4.62            | 5.19                           | +   | 1.20E-10    | 2.97E-08 |
| ↳heterocycle catabolic process                                                                               |                    | 419   | 24       | 4.56            | 5.27                           | +   | 9.14E-11    | 2.29E-08 |
| ↳aromatic compound catabolic process                                                                         |                    | 441   | 24       | 4.80            | 5.00                           | +   | 2.45E-10    | 5.61E-08 |
| ↳organic cyclic compound catabolic process                                                                   |                    | 469   | 24       | 5.10            | 4.70                           | +   | 7.94E-10    | 1.65E-07 |
| ↳mRNA metabolic process                                                                                      |                    | 694   | 53       | 7.55            | 7.02                           | +   | 1.43E-28    | 2.25E-24 |
| viral transcription                                                                                          |                    | 116   | 20       | 1.26            | 15.85                          | +   | 2.71E-17    | 1.86E-14 |
| ↳viral process                                                                                               |                    | 849   | 31       | 9.23            | 3.36                           | +   | 6.28E-09    | 1.19E-06 |
| ↳biological process involved in symbiotic interaction                                                        |                    | 937   | 35       | 10.19           | 3.43                           | +   | 3.25E-10    | 7.22E-08 |
| ↳viral gene expression                                                                                       |                    | 172   | 21       | 1.87            | 11.23                          | +   | 2.23E-15    | 9.52E-13 |
| regulation of alternative mRNA splicing, via spliceosome                                                     |                    | 58    | 9        | .63             | 14.27                          | +   | 4.09E-08    | 7.10E-06 |
| ↳regulation of mRNA splicing, via spliceosome                                                                |                    | 103   | 13       | 1.12            | 11.60                          | +   | 3.79E-10    | 8.18E-08 |
| ↳regulation of mRNA processing                                                                               |                    | 142   | 14       | 1.54            | 9.06                           | +   | 1.53E-09    | 3.10E-07 |
| ↳regulation of mRNA metabolic process                                                                        |                    | 341   | 21       | 3.71            | 5.66                           | +   | 4.24E-10    | 9.04E-08 |
| ↳regulation of RNA splicing                                                                                  |                    | 149   | 15       | 1.62            | 9.26                           | +   | 3.00E-10    | 6.77E-08 |
| positive regulation of protein insertion into mitochondrial membrane involved in apoptotic signaling pathway |                    | 26    | 4        | .28             | 14.14                          | +   | 2.87E-04    | 2.83E-02 |
| ↳positive regulation of intracellular transport                                                              |                    | 227   | 11       | 2.47            | 4.46                           | +   | 5.70E-05    | 6.51E-03 |
| ↳positive regulation of establishment of protein localization to mitochondrion                               |                    | 58    | 6        | .63             | 9.51                           | +   | 6.46E-05    | 7.18E-03 |
| ↳regulation of establishment of protein localization to mitochondrion                                        |                    | 73    | 7        | .79             | 8.82                           | +   | 2.48E-05    | 2.99E-03 |
| ↳regulation of protein insertion into mitochondrial membrane involved in apoptotic signaling pathway         |                    | 26    | 4        | .28             | 14.14                          | +   | 2.87E-04    | 2.81E-02 |
| mitochondrial electron transport, NADH to ubiquinone                                                         |                    | 49    | 7        | .53             | 13.13                          | +   | 2.25E-06    | 3.23E-04 |
| spliceosomal complex assembly                                                                                |                    | 57    | 7        | .62             | 11.29                          | +   | 5.61E-06    | 7.43E-04 |
| ↳mRNA splicing, via spliceosome                                                                              |                    | 402   | 22       | 3.28            | 6.70                           | +   | 7.53E-12    | 2.20E-09 |
| ↳mRNA processing                                                                                             |                    | 486   | 33       | 5.29            | 6.24                           | +   | 1.93E-16    | 1.09E-13 |
| ↳RNA processing                                                                                              |                    | 923   | 59       | 10.04           | 5.88                           |     |             |          |



GENE ONTOLOGY

Unifying Biology

GENE ONTOLOGY

Classification System

LOGIN

REGISTER

CONTACT US

Home

About

PANTHER Data

PANTHER Tools

PANTHER Services

Workspace

Downloads

Help/Tutorial

New

Enhancer-Gene Map

PANTHER16.0 Released.

Analysis Summary: Please report in publication

Analysis Type: PANTHER Overrepresentation Test (Released 20210224)

Annotation Version and Release Date: GO Ontology database DOI: 10.5281/zenodo.4437524 Released 2021-01-01

Analyzed List: upload\_1 (Homo sapiens) 

Change

Reference List: Homo sapiens (all genes in database) 

Change

Annotation Data Set: GO biological process complete

Test Type: Fisher's Exact ☐ Binomial

Correction: ☒ Calculate False Discovery Rate ☐ Use the Bonferroni correction for multiple testing ☐ No correction

Results

Uniquely Mapped IDS: 20595 out of 20595

Unmapped IDs: 0

Multiple mapping information: 0

upload\_1

212 out of 223

13

Export

Table

XML with user input ids

JSON with user input ids

Displaying only results for FDR P < 0.05, [click here to display all results](#)

|                                                                                                               | Homo sapiens (REF) | upload_1 (▼ Hierarchy, NEW! (?) |          |                 |     |             |          |
|---------------------------------------------------------------------------------------------------------------|--------------------|---------------------------------|----------|-----------------|-----|-------------|----------|
|                                                                                                               | #                  | #                               | expected | Fold Enrichment | +/- | raw P value | FDR      |
| mitochondrial ATP synthesis coupled proton transport                                                          | 19                 | 4                               | .21      | 19.44           | +   | 9.67E-05    | 1.30E-02 |
| ↳ATP synthesis coupled proton transport                                                                       | 24                 | 4                               | .26      | 15.39           | +   | 2.14E-04    | 2.62E-02 |
| ↳organic cyclic compound metabolic process                                                                    | 3190               | 76                              | 34.54    | 2.20            | +   | 1.14E-11    | 4.74E-09 |
| ↳organic substance metabolic process                                                                          | 7879               | 118                             | 85.31    | 1.38            | +   | 1.14E-05    | 1.88E-03 |
| ↳metabolic process                                                                                            | 8334               | 141                             | 90.24    | 1.56            | +   | 1.36E-11    | 5.48E-09 |
| ↳organic substance biosynthetic process                                                                       | 2804               | 60                              | 30.36    | 1.98            | +   | 2.15E-07    | 3.99E-05 |
| ↳biosynthetic process                                                                                         | 2862               | 60                              | 30.99    | 1.94            | +   | 4.73E-07    | 8.58E-05 |
| ↳heterocycle metabolic process                                                                                | 2904               | 75                              | 31.44    | 2.39            | +   | 2.60E-13    | 1.58E-10 |
| ↳cellular metabolic process                                                                                   | 7571               | 138                             | 81.98    | 1.68            | +   | 4.54E-14    | 3.41E-11 |
| ↳cellular process                                                                                             | 15487              | 203                             | 167.69   | 1.21            | +   | 2.64E-09    | 6.82E-07 |
| ↳cellular biosynthetic process                                                                                | 2709               | 60                              | 29.33    | 2.05            | +   | 5.00E-08    | 1.04E-05 |
| ↳cellular nitrogen compound biosynthetic process                                                              | 1575               | 47                              | 17.05    | 2.76            | +   | 2.67E-10    | 8.58E-08 |
| ↳cellular nitrogen compound metabolic process                                                                 | 3407               | 86                              | 36.89    | 2.33            | +   | 6.41E-15    | 7.78E-12 |
| ↳nitrogen compound metabolic process                                                                          | 6898               | 114                             | 74.69    | 1.53            | +   | 9.77E-08    | 1.90E-05 |
| ↳cellular aromatic compound metabolic process                                                                 | 2949               | 76                              | 31.93    | 2.38            | +   | 1.80E-13    | 1.18E-10 |
| ↳organonitrogen compound biosynthetic process                                                                 | 1380               | 43                              | 14.94    | 2.88            | +   | 5.02E-10    | 1.47E-07 |
| ↳nucleobase-containing compound metabolic process                                                             | 2720               | 75                              | 29.45    | 2.55            | +   | 7.87E-15    | 8.87E-12 |
| ↳primary metabolic process                                                                                    | 7365               | 116                             | 79.75    | 1.45            | +   | 1.03E-06    | 1.83E-04 |
| ↳ATP metabolic process                                                                                        | 206                | 18                              | 2.23     | 8.07            | +   | 3.87E-11    | 1.52E-08 |
| ↳purine ribonucleoside triphosphate biosynthetic process                                                      | 47                 | 5                               | .51      | 9.82            | +   | 2.33E-04    | 2.78E-02 |
| ↳purine nucleoside triphosphate biosynthetic process                                                          | 48                 | 5                               | .52      | 9.62            | +   | 2.55E-04    | 2.98E-02 |
| ↳ribonucleoside triphosphate biosynthetic process                                                             | 53                 | 5                               | .57      | 8.71            | +   | 3.89E-04    | 4.24E-02 |
| ↳energy coupled proton transport, down electrochemical gradient                                               | 24                 | 4                               | .26      | 15.39           | +   | 2.14E-04    | 2.60E-02 |
| ↳proton transmembrane transport                                                                               | 134                | 9                               | 1.45     | 6.20            | +   | 2.43E-05    | 3.62E-03 |
| ↳ion transport                                                                                                | 2882               | 53                              | 31.21    | 1.70            | +   | 9.56E-05    | 1.30E-02 |
| ↳localization                                                                                                 | 5805               | 88                              | 62.86    | 1.40            | +   | 3.16E-04    | 3.53E-02 |
| ↳oxidative phosphorylation                                                                                    | 120                | 18                              | 1.30     | 13.85           | +   | 8.98E-15    | 9.45E-12 |
| ↳generation of precursor metabolites and energy                                                               | 402                | 19                              | 4.35     | 4.37            | +   | 1.53E-07    | 2.91E-05 |
| ↳phosphorylation                                                                                              | 1023               | 28                              | 11.08    | 2.53            | +   | 8.48E-06    | 1.41E-03 |
| ↳intracellular transport                                                                                      | 1500               | 44                              | 16.24    | 2.71            | +   | 1.88E-09    | 5.02E-07 |
| ↳establishment of localization in cell                                                                        | 2365               | 53                              | 25.61    | 2.07            | +   | 2.79E-07    | 5.11E-05 |
| ↳cellular localization                                                                                        | 3006               | 64                              | 32.55    | 1.97            | +   | 9.96E-08    | 1.92E-05 |
| ↳mitochondrial transmembrane transport                                                                        | 105                | 9                               | 1.14     | 7.92            | +   | 3.87E-06    | 6.49E-04 |
| ↳mitochondrial transport                                                                                      | 229                | 17                              | 2.48     | 6.86            | +   | 1.42E-09    | 3.93E-07 |
| ribosomal small subunit assembly                                                                              | 21                 | 4                               | .23      | 17.59           | +   | 1.36E-04    | 1.79E-02 |
| ↳organelle organization                                                                                       | 3574               | 74                              | 38.70    | 1.91            | +   | 1.32E-08    | 2.93E-06 |
| ↳cellular component organization                                                                              | 5776               | 103                             | 62.54    | 1.65            | +   | 1.28E-08    | 2.89E-06 |
| ↳cellular component organization or biogenesis                                                                | 6000               | 120                             | 64.97    | 1.85            | +   | 2.12E-14    | 1.76E-11 |
| ↳cellular component assembly                                                                                  | 2438               | 52                              | 26.40    | 1.97            | +   | 1.97E-06    | 3.45E-04 |
| ↳cellular component biogenesis                                                                                | 2701               | 69                              | 29.25    | 2.36            | +   | 5.69E-12    | 2.56E-09 |
| ↳ribosome biogenesis                                                                                          | 332                | 22                              | 3.59     | 6.12            | +   | 3.89E-11    | 1.50E-08 |
| ↳ribonucleoprotein complex biogenesis                                                                         | 465                | 28                              | 5.03     | 5.56            | +   | 6.31E-13    | 3.55E-10 |
| ↳ribonucleoprotein complex assembly                                                                           | 190                | 11                              | 2.06     | 5.35            | +   | 1.15E-05    | 1.85E-03 |
| ↳ribonucleoprotein complex subunit organization                                                               | 197                | 11                              | 2.13     | 5.16            | +   | 1.59E-05    | 2.51E-03 |
| ↳protein-containing complex subunit organization                                                              | 1582               | 42                              | 17.13    | 2.45            | +   | 8.73E-08    | 1.74E-05 |
| ↳cellular protein-containing complex assembly                                                                 | 860                | 31                              | 9.31     | 3.33            | +   | 7.54E-09    | 1.83E-06 |
| ↳protein-containing complex assembly                                                                          | 1338               | 37                              | 14.49    | 2.55            | +   | 1.94E-07    | 3.64E-05 |
| cytoplasmic translation                                                                                       | 75                 | 14                              | .81      | 17.24           | +   | 6.53E-13    | 3.55E-10 |
| ↳translation                                                                                                  | 384                | 30                              | 4.16     | 7.22            | +   | 1.32E-16    | 3.47E-13 |
| ↳peptide biosynthetic process                                                                                 | 409                | 30                              | 4.43     | 6.77            | +   | 6.50E-16    | 9.31E-13 |
| ↳peptide metabolic process                                                                                    | 537                | 31                              | 5.81     | 5.33            | +   | 9.46E-14    | 6.49E-11 |
| ↳cellular amide metabolic process                                                                             | 808                | 31                              | 8.75     | 3.54            | +   | 1.83E-09    | 4.98E-07 |
| ↳amide biosynthetic process                                                                                   | 528                | 30                              | 5.72     | 5.25            | +   | 3.62E-13    | 2.12E-10 |
| ↳gene expression                                                                                              | 2187               | 74                              | 23.68    | 3.12            | +   | 2.30E-19    | 1.82E-15 |
| ↳macromolecule metabolic process                                                                              | 6194               | 106                             | 67.07    | 1.58            | +   | 6.19E-08    | 1.27E-05 |
| ↳cellular macromolecule biosynthetic process                                                                  | 1655               | 49                              | 17.92    | 2.73            | +   | 1.32E-10    | 4.51E-08 |
| ↳cellular macromolecule metabolic process                                                                     | 4964               | 79                              | 53.75    | 1.47            | +   | 1.53E-04    | 1.99E-02 |
| ↳macromolecule biosynthetic process                                                                           | 1696               | 49                              | 18.36    | 2.67            | +   | 2.98E-10    | 9.04E-08 |
| SRP-dependent cotranslational protein targeting to membrane                                                   | 96                 | 17                              | 1.04     | 16.35           | +   | 4.45E-15    | 5.84E-12 |
| ↳protein targeting to ER                                                                                      | 111                | 19                              | 1.20     | 15.81           | +   | 1.80E-16    | 4.06E-13 |
| ↳protein targeting                                                                                            | 370                | 27                              | 4.01     | 6.74            | +   | 2.30E-14    | 1.82E-11 |
| ↳intracellular protein transport                                                                              | 974                | 33                              | 10.55    | 3.13            | +   | 1.01E-08    | 2.42E-06 |
| ↳cellular protein localization                                                                                | 1643               | 43                              | 17.79    | 2.42            | +   | 8.13E-08    | 1.64E-05 |
| ↳cellular macromolecule localization                                                                          | 1649               | 43                              | 17.86    | 2.41            | +   | 8.88E-08    | 1.75E-05 |
| ↳protein localization                                                                                         | 2161               | 45                              | 23.40    | 1.92            | +   | 2.36E-05    | 3.54E-03 |
| ↳protein transport                                                                                            | 1464               | 35                              | 15.85    | 2.21            | +   | 1.15E-05    | 1.87E-03 |
| ↳establishment of protein localization                                                                        | 1559               | 36                              | 16.88    | 2.13            | +   | 1.96E-05    | 2.99E-03 |
| ↳peptide transport                                                                                            | 1493               | 35                              | 16.17    | 2.17            | +   | 2.25E-05    | 3.42E-03 |
| ↳amide transport                                                                                              | 1527               | 36                              | 16.53    | 2.18            | +   | 1.51E-05    | 2.41E-03 |
| ↳establishment of protein localization to endoplasmic reticulum                                               | 115                | 19                              | 1.25     | 15.26           | +   | 3.22E-16    | 6.36E-13 |
| ↳protein localization to endoplasmic reticulum                                                                | 142                | 19                              | 1.54     | 12.36           | +   | 1.03E-14    | 9.60E-12 |
| ↳protein localization to organelle                                                                            | 791                | 32                              | 8.56     | 3.74            | +   | 2.74E-10    | 8.65E-08 |
| ↳establishment of protein localization to organelle                                                           | 449                | 26                              | 4.86     | 5.35            | +   | 1.02E-11    | 4.36E-09 |
| ↳cotranslational protein targeting to membrane                                                                | 101                | 18                              | 1.09     | 16.46           | +   | 6.14E-16    | 9.69E-13 |
| ↳protein targeting to membrane                                                                                | 183                | 19                              | 1.98     | 9.59            | +   | 6.61E-13    | 3.47E-10 |
| ↳establishment of protein localization to membrane                                                            | 307                | 21                              | 3.32     | 6.32            | +   | 6.36E-11    | 2.33E-08 |
| ↳protein localization to membrane                                                                             | 537                | 23                              | 5.81     | 3.96            | +   | 4.01E-08    | 8.44E-06 |
| positive regulation of protein insertion into mitochondrial membrane involved in apoptotic signaling pathway  | 26                 | 4                               | .28      | 14.21           | +   | 2.82E-04    | 3.25E-02 |
| ↳positive regulation of establishment of protein localization to mitochondrion                                | 58                 | 6                               | .63      | 9.55            | +   | 6.31E-05    | 8.80E-03 |
| ↳regulation of establishment of protein localization to mitochondrion                                         | 73                 | 6                               | .79      | 7.59            | +   | 2.05E-04    | 2.56E-02 |
| ↳positive regulation of mitochondrial outer membrane permeabilization involved in apoptotic signaling pathway | 36                 | 5                               | .39      | 12.83           | +   | 7.38E-05    | 1.02E-02 |
| ↳positive regulation of mitochondrion organization                                                            | 85                 | 6                               | .92      | 6.52            | +   | 4.41E-04    | 4.77E-02 |
| ↳regulation of mitochondrion organization                                                                     | 155                | 8                               | 1.68     | 4.77            | +   | 3.83E-04    | 4.20E-02 |
| ↳regulation of mitochondrial outer membrane permeabilization involved in apoptotic signaling pathway          | 46                 | 6                               | .50      | 12.05           | +   | 1.91E-05    | 2.95E-03 |
| ↳regulation of mitochondrial membrane permeability                                                            | 73                 | 6                               | .79      | 7.59            | +   | 2.05E-04    | 2.58E-02 |
| ↳mitochondrial membrane organization                                                                          | 140                | 11                              | 1.52     | 7.26            | +   | 7.19E-07    | 1.29E-04 |
| ↳mitochondrion organization                                                                                   | 457                | 30                              | 4.95     | 6.06            | +   | 1.04E-14    | 9.13E-12 |
| ↳regulation of protein insertion into mitochondrial membrane involved in apoptotic signaling pathway          | 26                 | 4                               | .28      | 14.21           | +   | 2.82E-04    | 3.23E-02 |
| nuclear-transcribed mRNA catabolic process, nonsense-mediated decay                                           | 120                | 18                              | 1.30     | 13.85           | +   | 8.98E-15    | 8.86E-12 |
| ↳nuclear-transcribed mRNA catabolic process                                                                   | 196                | 20                              | 2.12     | 9.42            | +   | 2.15E-13    | 1.36E-10 |
| ↳mRNA catabolic process                                                                                       | 216                | 20                              | 2.34     | 8.55            | +   | 1.13E-12    | 5.76E-10 |
| ↳negative regulation of gene expression                                                                       | 2034               | 40                              | 22.02    | 1.82            | +   | 2.65E-04    | 3.08E-02 |
| ↳negative regulation of macromolecule metabolic process                                                       | 2862               | 52                              | 30.99    | 1.68            | +   | 1.95E-04    | 2.47E-02 |
| ↳regulation of metabolic process                                                                              | 6854               | 101                             | 74.21    | 1.36            | +   | 2.53E-04    | 2.98E-02 |
| ↳regulation of macromolecule metabolic process                                                                | 6308               | 97                              | 68.30    | 1.42            | +   | 5.59E-05    | 7.87E-03 |
| ↳regulation of gene expression                                                                                | 4880               | 82                              | 52.84    | 1.55            | +   | 1.67E-05    | 2.61E-03 |
| ↳RNA catabolic process                                                                                        | 246                | 21                              | 2.66     | 7.88            | +   | 1.29E-12    | 6.33E-10 |
| ↳RNA metabolic process                                                                                        | 1599               | 62                              | 17.31    | 3.58            | +   | 9.01E-19    | 4.73E-15 |
| ↳nucleic acid metabolic process                                                                               | 2232               | 69                              | 24.17    | 2.86            | +   | 5.87E-16    | 1.03E-12 |
| ↳cellular macromolecule catabolic process                                                                     | 912                | 25                              | 9.88     | 2.53            | +   | 2.61E-05    | 3.85E-03 |
| ↳macromolecule catabolic process                                                                              | 1046               | 25                              | 11.33    | 2.21            | +   | 3.12E-04    | 3.52E-02 |
| ↳nucleobase-containing compound catabolic process                                                             | 375                | 22                              | 4.06     | 5.42            | +   | 3.48E-10    | 1.04E-07 |
| ↳cellular nitrogen compound catabolic process                                                                 | 425                | 22                              | 4.60     | 4.78            | +   | 3.17E-09    | 8.06E-07 |
| ↳heterocycle catabolic process                                                                                | 419                | 22                              | 4.54     | 4.85            | +   | 2.47E-09    | 6.50E-07 |
| ↳aromatic compound catabolic process                                                                          | 441                | 22                              | 4.78     | 4.61            | +   | 6.02E-09    | 1.48E-06 |
| ↳organic cyclic compound catabolic process                                                                    | 469                | 22                              | 5.08     | 4.33            | +   | 1.73E-08    | 3.75E-06 |
| ↳mRNA metabolic process                                                                                       | 694                | 44                              | 7.51     | 5.86            | +   | 9.37E-21    | 1.48E-16 |
| translational initiation                                                                                      | 143                | 21                              | 1.55     | 13.56           | +   | 7.12E-17    | 2.25E-13 |
| viral transcription                                                                                           | 116                | 17                              | 1.26     | 13.53           | +   | 7.17E-14    | 5.14E-11 |
| ↳viral process                                                                                                | 849                | 31                              | 9.19     | 3.37            | +   | 5.64E-09    | 1.41E-06 |
| ↳biological process involved in symbiotic interaction                                                         | 937                | 34                              | 10.15    | 3.35            | +   | 1.10E-09    | 3.09E-07 |
| ↳viral gene expression                                                                                        | 172                | 18                              | 1.86     | 9.66            | +   | 2.42E-12    | 1.15E-09 |

**New** [Enhancer-Gene Map](#)     [PANTHER16.0 Released.](#)

**Analysis Summary:** Please report in publication 

**Analysis Type:** PANTHER Overrepresentation Test (Released 20210224)

**Annotation Version and Release Date:** GO Ontology database DOI: 10.5281/zenodo.4437524 Released 2021-01-01

**Analyzed List:**  [Change](#)

**Reference List:**  [Change](#)

**Annotation Data Set:**  [?](#)

**Test Type:** ☒ Fisher's Exact ☐ Binomial

**Correction:** ☒ Calculate False Discovery Rate ☐ Use the Bonferroni correction for multiple testing [?](#) ☐ No correction

## Results

|                               | Reference list     | upload_1       |
|-------------------------------|--------------------|----------------|
| Uniquely Mapped IDS:          | 20595 out of 20595 | 138 out of 142 |
| Unmapped IDs:                 | 0                  | 8              |
| Multiple mapping information: | 0                  | 2              |

Export [Table](#) [XML with user input ids](#) [JSON with user input ids](#)

Displaying only results for FDR  $P < 0.05$ . [click here to display all results](#)

| GO biological process complete                                        | Homo sapiens (REF) | upload 1 (▼Hierarchy NEW! ?) |          |                 |     |             |          |
|-----------------------------------------------------------------------|--------------------|------------------------------|----------|-----------------|-----|-------------|----------|
|                                                                       | #                  | #                            | expected | Fold Enrichment | +/- | raw P value | FDR      |
| regulation of mRNA stability involved in response to oxidative stress | 2                  | 2                            | .01      | > 100           | +   | 2.77E-04    | 3.28E-02 |
| ↳regulation of gene expression                                        | 4880               | 57                           | 33.65    | 1.69            | +   | 1.63E-05    | 2.68E-03 |
| ↳cellular process                                                     | 15487              | 127                          | 106.78   | 1.19            | +   | 3.32E-05    | 4.94E-03 |
| mitochondrial ATP synthesis coupled proton transport                  | 19                 | 4                            | .13      | 30.53           | +   | 1.69E-05    | 2.74E-03 |
| ↳ATP synthesis coupled proton transport                               | 24                 | 4                            | .17      | 24.17           | +   | 3.80E-05    | 5.49E-03 |
| ↳ATP biosynthetic process                                             | 36                 | 4                            | .25      | 16.12           | +   | 1.59E-04    | 1.93E-02 |
| ↳organic cyclic compound metabolic process                            | 3190               | 55                           | 21.99    | 2.50            | +   | 2.14E-11    | 9.91E-09 |
| ↳organic substance metabolic process                                  | 7879               | 78                           | 54.32    | 1.44            | +   | 6.19E-05    | 8.35E-03 |
| ↳metabolic process                                                    | 8334               | 91                           | 57.46    | 1.58            | +   | 2.27E-08    | 6.40E-06 |
| ↳organic substance biosynthetic process                               | 2804               | 43                           | 19.33    | 2.22            | +   | 2.62E-07    | 5.82E-05 |
| ↳biosynthetic process                                                 | 2862               | 44                           | 19.73    | 2.23            | +   | 1.66E-07    | 3.74E-05 |
| ↳heterocycle metabolic process                                        | 2904               | 53                           | 20.02    | 2.65            | +   | 7.07E-12    | 3.98E-09 |
| ↳cellular metabolic process                                           | 7571               | 89                           | 52.20    | 1.70            | +   | 7.04E-10    | 2.53E-07 |
| ↳cellular biosynthetic process                                        | 2709               | 43                           | 18.68    | 2.30            | +   | 1.28E-07    | 2.98E-05 |
| ↳cellular nitrogen compound biosynthetic process                      | 1575               | 36                           | 10.86    | 3.32            | +   | 1.44E-10    | 5.83E-08 |
| ↳cellular nitrogen compound metabolic process                         | 3407               | 59                           | 23.49    | 2.51            | +   | 2.03E-12    | 1.28E-09 |
| ↳nitrogen compound metabolic process                                  | 6898               | 73                           | 47.56    | 1.53            | +   | 1.50E-05    | 2.50E-03 |
| ↳cellular aromatic compound metabolic process                         | 2949               | 53                           | 20.33    | 2.61            | +   | 1.27E-11    | 6.69E-09 |
| ↳organonitrogen compound biosynthetic process                         | 1380               | 32                           | 9.51     | 3.36            | +   | 1.37E-09    | 4.71E-07 |
| ↳nucleobase-containing compound metabolic process                     | 2720               | 52                           | 18.75    | 2.77            | +   | 2.14E-12    | 1.30E-09 |
| ↳primary metabolic process                                            | 7365               | 76                           | 50.78    | 1.50            | +   | 2.06E-05    | 3.19E-03 |
| ↳ATP metabolic process                                                | 206                | 13                           | 1.42     | 9.15            | +   | 3.73E-09    | 1.8E-06  |
| ↳purine ribonucleoside triphosphate biosynthetic process              | 47                 | 5                            | .32      | 15.43           | +   | 2.81E-05    | 4.27E-03 |
| ↳purine nucleoside triphosphate biosynthetic process                  | 48                 | 5                            | .33      | 15.11           | +   | 3.09E-05    | 4.64E-03 |
| ↳nucleoside triphosphate biosynthetic process                         | 65                 | 5                            | .45      | 11.16           | +   | 1.19E-04    | 1.51E-02 |
| ↳purine nucleoside triphosphate metabolic process                     | 67                 | 5                            | .46      | 10.82           | +   | 1.36E-04    | 1.67E-02 |
| ↳ribonucleoside triphosphate biosynthetic process                     | 53                 | 5                            | .37      | 13.68           | +   | 4.80E-05    | 6.76E-03 |
| ↳ribonucleoside triphosphate metabolic process                        | 68                 | 5                            | .47      | 10.66           | +   | 1.45E-04    | 1.77E-02 |
| ↳purine ribonucleoside triphosphate metabolic process                 | 61                 | 5                            | .42      | 11.89           | +   | 8.96E-05    | 1.17E-02 |
| ↳energy coupled proton transport, down electrochemical gradient       | 24                 | 4                            | .17      | 24.17           | +   | 3.80E-05    | 5.44E-03 |
| ↳proton transmembrane transport                                       | 134                | 6                            | .92      | 6.49            | +   | 4.10E-04    | 4.76E-02 |
| ↳ion transport                                                        | 2882               | 41                           | 19.87    | 2.06            | +   | 4.53E-06    | 8.22E-04 |
| ↳transport                                                            | 4502               | 53                           | 31.04    | 1.71            | +   | 3.70E-05    | 5.45E-03 |
| ↳establishment of localization                                        | 4653               | 53                           | 32.08    | 1.65            | +   | 7.57E-05    | 1.00E-02 |
| ↳localization                                                         | 5805               | 62                           | 40.02    | 1.55            | +   | 1.08E-04    | 1.38E-02 |
| ↳oxidative phosphorylation                                            | 120                | 13                           | .83      | 15.71           | +   | 7.38E-12    | 4.01E-09 |
| ↳generation of precursor metabolites and energy                       | 402                | 14                           | 2.77     | 5.05            | +   | 1.07E-06    | 2.19E-04 |
| ↳phosphorylation                                                      | 1023               | 18                           | 7.05     | 2.55            | +   | 2.74E-04    | 3.28E-02 |
| ↳intracellular transport                                              | 1500               | 33                           | 10.34    | 3.19            | +   | 2.61E-09    | 8.42E-07 |
| ↳establishment of localization in cell                                | 2365               | 42                           | 16.31    | 2.58            | +   | 5.80E-09    | 1.79E-06 |
| ↳cellular localization                                                | 3006               | 46                           | 20.73    | 2.22            | +   | 1.27E-07    | 2.99E-05 |
| ↳mitochondrial transmembrane transport                                | 105                | 7                            | .72      | 9.67            | +   | 1.21E-05    | 2.03E-03 |
| ↳mitochondrial transport                                              | 229                | 12                           | 1.58     | 7.60            | +   | 1.06E-07    | 2.61E-05 |
| ribosomal small subunit assembly                                      | 21                 | 4                            | .14      | 27.63           | +   | 2.38E-05    | 3.65E-03 |
| ↳cellular component organization or biogenesis                        | 6000               | 68                           | 41.37    | 1.64            | +   | 2.80E-06    | 5.31E-04 |
| ↳cellular component biogenesis                                        | 2701               | 44                           | 18.62    | 2.36            | +   | 3.06E-08    | 8.18E-06 |
| ↳ribosome biogenesis                                                  | 332                | 17                           | 2.29     | 7.43            | +   | 2.83E-10    | 1.06E-07 |
| ↳ribonucleoprotein complex biogenesis                                 | 465                | 21                           | 3.21     | 6.55            | +   | 1.81E-11    | 8.65E-09 |
| ↳ribosomal small subunit biogenesis                                   | 75                 | 6                            | .52      | 11.60           | +   | 1.97E-05    | 3.14E-03 |
| ↳ribonucleoprotein complex assembly                                   | 190                | 8                            | 1.31     | 6.11            | +   | 6.75E-05    | 9        |
