# Supplementary material
Source: PubMed Central journal article supplement (PMC8761390)
Supplement: NIHMS1710729-supplement-11.pdf [file NIHMS1710729-supplement-11.pdf]

Analysis Summary: Please report in publication

Analysis Type: PANTHER Overrepresentation Test (Released 20210224)

Annotation Version and Release Date: GO Ontology database DOI: 10.5281/zenodo.4437524 Released 2021-01-01

Analysis List: upload\_1 (Homo sapiens) 

Change

Reference List: Homo sapiens (all genes in database) 

Change

Annotation Data Set: 

GO biological process complete

3

Test Type: Fisher's Exact ☐ Binomial ☐

Correction: Calculate False Discovery Rate ☐ Use the Bonferroni correction for multiple testing ☐ No correction ☐

Results

|                               |                    |                |
|-------------------------------|--------------------|----------------|
| Uniquely Mapped IDs:          | 20595 out of 20595 | 902 out of 944 |
| Unmapped IDs:                 | 0                  | 32             |
| Multiple mapping information: | 0                  | 47             |

Export 

Table

XML with user input file

JSON with user input file

Displaying only results for FDR P < 0.05, click here to display all results

|                                                                                                  |       |     |        |      |            |          |
|--------------------------------------------------------------------------------------------------|-------|-----|--------|------|------------|----------|
| cellium development                                                                              | 269   | 29  | 7.75   | 2.45 | + 8.37E-04 | 3.80E-02 |
| telencephalon development                                                                        | 152   | 19  | 11.55  | 2.51 | + 2.14E-05 | 1.69E-03 |
| forebrain development                                                                            | 380   | 41  | 17.42  | 2.35 | + 1.75E-06 | 1.95E-04 |
| brain development                                                                                | 745   | 75  | 34.15  | 2.20 | + 1.64E-09 | 6.29E-07 |
| central nervous system development                                                               | 991   | 97  | 45.42  | 2.14 | + 2.72E-11 | 2.05E-08 |
| nervous system development                                                                       | 2189  | 184 | 100.34 | 1.83 | + 6.10E-15 | 3.21E-11 |
| system development                                                                               | 4275  | 286 | 195.95 | 1.46 | + 1.87E-11 | 1.64E-08 |
| multicellular organism development                                                               | 4875  | 321 | 223.45 | 1.44 | + 2.62E-12 | 4.14E-09 |
| multicellular organismal process                                                                 | 6908  | 376 | 316.64 | 1.19 | + 8.01E-05 | 5.29E-03 |
| head development                                                                                 | 788   | 80  | 36.12  | 2.21 | + 2.99E-10 | 1.52E-07 |
| animal organ development                                                                         | 2186  | 203 | 146.03 | 1.39 | + 1.85E-06 | 2.02E-04 |
| telencephalon regionalization                                                                    | 12    | 6   | .55    | 1.91 | + 8.22E-05 | 5.38E-03 |
| regionalization                                                                                  | 318   | 33  | 14.58  | 2.26 | + 5.35E-05 | 3.73E-03 |
| pattern specification process                                                                    | 423   | 39  | 19.39  | 2.01 | + 1.16E-04 | 7.33E-03 |
| forebrain regionalization                                                                        | 22    | 7   | 1.01   | 6.84 | + 2.03E-04 | 1.19E-02 |
| oligodendrocyte differentiation                                                                  | 11    | 5   | .50    | 9.92 | + 4.66E-04 | 2.33E-02 |
| cell differentiation                                                                             | 3612  | 227 | 160.98 | 1.38 | + 7.86E-07 | 9.54E-05 |
| cellular developmental process                                                                   | 3555  | 228 | 163.41 | 1.40 | + 2.29E-07 | 3.25E-05 |
| cellular process                                                                                 | 15482 | 792 | 709.87 | 1.12 | + 1.66E-11 | 1.54E-08 |
| clonogenesis                                                                                     | 222   | 26  | 10.18  | 2.56 | + 5.11E-05 | 3.62E-03 |
| angiogenesis                                                                                     | 3589  | 122 | 62.75  | 2.02 | + 4.19E-13 | 1.19E-09 |
| positive regulation of nuclear-transcribed mRNA catabolic process, deadenylation-dependent decay | 16    | 6   | .73    | 8.18 | + 2.84E-04 | 1.55E-02 |
| regulation of mRNA catabolic process                                                             | 214   | 23  | 9.81   | 2.24 | + 1.02E-03 | 4.50E-02 |
| regulation of metabolic process                                                                  | 5854  | 423 | 314.16 | 1.35 | + 7.32E-13 | 1.14E-09 |
| biological regulation                                                                            | 12576 | 632 | 576.44 | 1.11 | + 7.21E-05 | 4.88E-03 |
| regulation of cellular metabolic process                                                         | 6110  | 372 | 280.06 | 1.35 | + 5.56E-11 | 3.99E-08 |
| regulation of cellular process                                                                   | 11308 | 582 | 518.32 | 1.12 | + 4.37E-05 | 3.19E-03 |
| regulation of mRNA metabolic process                                                             | 241   | 36  | 15.63  | 2.30 | + 1.76E-05 | 1.43E-03 |
| regulation of RNA metabolic process                                                              | 3738  | 252 | 171.34 | 1.47 | + 2.53E-10 | 1.33E-07 |
| regulation of macromolecule metabolic process                                                    | 6308  | 402 | 289.14 | 1.39 | + 4.37E-14 | 1.72E-10 |
| regulation of nucleobase-containing compound metabolic process                                   | 4002  | 256 | 193.67 | 1.45 | + 3.18E-10 | 1.57E-07 |
| regulation of nitrogen compound metabolic process                                                | 5690  | 362 | 260.90 | 1.39 | + 3.57E-12 | 5.12E-09 |
| regulation of primary metabolic process                                                          | 5895  | 368 | 270.21 | 1.36 | + 2.72E-11 | 2.14E-08 |
| regulation of gene expression                                                                    | 4590  | 324 | 223.68 | 1.45 | + 6.52E-13 | 1.47E-09 |
| positive regulation of mRNA metabolic process                                                    | 85    | 13  | 3.90   | 3.34 | + 3.46E-04 | 1.85E-02 |
| positive regulation of RNA metabolic process                                                     | 1219  | 129 | 78.79  | 1.64 | + 1.01E-07 | 1.58E-05 |
| positive regulation of nucleobase-containing compound metabolic process                          | 1892  | 142 | 86.72  | 1.64 | + 1.95E-08 | 3.06E-06 |
| positive regulation of nitrogen compound metabolic process                                       | 3059  | 208 | 140.21 | 1.48 | + 9.94E-09 | 2.18E-06 |
| positive regulation of metabolic process                                                         | 3720  | 243 | 170.51 | 1.43 | + 1.24E-08 | 2.62E-06 |
| positive regulation of biological process                                                        | 6245  | 369 | 286.25 | 1.29 | + 2.52E-08 | 4.56E-06 |
| positive regulation of cellular metabolic process                                                | 3239  | 219 | 148.46 | 1.48 | + 5.56E-09 | 1.44E-06 |
| positive regulation of cellular process                                                          | 5652  | 351 | 259.30 | 1.35 | + 2.43E-10 | 1.32E-07 |
| positive regulation of macromolecule metabolic process                                           | 3432  | 229 | 167.31 | 1.46 | + 2.71E-09 | 1.62E-06 |
| regulation of nuclear-transcribed mRNA catabolic process, deadenylation-dependent decay          | 18    | 6   | .83    | 7.27 | + 4.76E-04 | 2.36E-02 |
| negative regulation of membrane potential                                                        | 14    | 5   | .64    | 7.79 | + 1.11E-03 | 4.79E-02 |
| mitochondrial ATP synthesis coupled proton transport                                             | 19    | 6   | .87    | 6.89 | + 6.03E-04 | 2.86E-02 |
| organic cyclic compound biosynthetic process                                                     | 1222  | 82  | 56.01  | 1.46 | + 9.92E-04 | 4.41E-02 |
| organic cyclic compound metabolic process                                                        | 3190  | 214 | 146.22 | 1.46 | + 1.73E-08 | 3.29E-06 |
| metabolic process                                                                                | 7879  | 432 | 361.14 | 1.20 | + 4.49E-06 | 4.51E-04 |
| organic substance biosynthetic process                                                           | 8334  | 475 | 382.00 | 1.24 | + 2.35E-09 | 8.22E-07 |
| biosynthetic process                                                                             | 2804  | 192 | 128.53 | 1.53 | + 2.76E-09 | 9.07E-07 |
| heterocycle biosynthetic process                                                                 | 2862  | 198 | 131.18 | 1.51 | + 6.90E-09 | 1.58E-06 |
| heterocycle metabolic process                                                                    | 1076  | 74  | 49.32  | 1.50 | + 1.06E-03 | 4.65E-02 |
| cellular metabolic process                                                                       | 2904  | 198 | 133.11 | 1.49 | + 2.50E-08 | 4.58E-06 |
| cellular biosynthetic process                                                                    | 7521  | 450 | 347.03 | 1.30 | + 2.58E-11 | 2.14E-08 |
| cellular nitrogen compound biosynthetic process                                                  | 2709  | 185 | 124.17 | 1.49 | + 6.94E-08 | 1.16E-05 |
| cellular nitrogen compound metabolic process                                                     | 3402  | 222 | 156.16 | 1.42 | + 8.48E-08 | 1.37E-05 |
| nitrogen compound biosynthetic process                                                           | 6888  | 384 | 316.18 | 1.21 | + 7.62E-06 | 7.11E-04 |
| cellular aromatic compound metabolic process                                                     | 2489  | 203 | 135.17 | 1.50 | + 6.02E-09 | 1.46E-06 |
| aromatic compound biosynthetic process                                                           | 1086  | 76  | 49.78  | 1.53 | + 5.02E-04 | 2.44E-02 |
| organonitrogen compound biosynthetic process                                                     | 1380  | 114 | 63.25  | 1.80 | + 5.72E-09 | 1.41E-06 |
| nucleobase-containing compound metabolic process                                                 | 2720  | 191 | 124.67 | 1.53 | + 5.68E-09 | 1.42E-06 |
| urinary metabolic process                                                                        | 7365  | 408 | 337.58 | 1.21 | + 3.93E-06 | 4.03E-04 |
| nucleobase-containing compound biosynthetic process                                              | 1003  | 70  | 45.97  | 1.52 | + 9.46E-04 | 4.21E-02 |
| ATP metabolic process                                                                            | 206   | 33  | 9.44   | 3.49 | + 5.35E-09 | 1.41E-06 |
| purine ribonucleoside triphosphate biosynthetic process                                          | 42    | 9   | 2.15   | 4.48 | + 6.81E-04 | 3.16E-02 |
| purine nucleoside triphosphate biosynthetic process                                              | 48    | 9   | 2.20   | 4.09 | + 7.78E-04 | 3.54E-02 |
| nucleoside triphosphate biosynthetic process                                                     | 65    | 11  | 2.98   | 3.69 | + 4.55E-04 | 2.30E-02 |
| nucleoside triphosphate metabolic process                                                        | 91    | 14  | 4.17   | 3.36 | + 1.98E-04 | 1.16E-02 |
| purine nucleoside triphosphate metabolic process                                                 | 62    | 12  | 3.07   | 3.91 | + 1.60E-04 | 9.59E-03 |
| purine ribonucleoside triphosphate metabolic process                                             | 61    | 10  | 2.80   | 3.58 | + 1.02E-03 | 4.49E-02 |
| ion transport                                                                                    | 2882  | 174 | 132.10 | 1.32 | + 2.32E-04 | 1.33E-02 |
| transport                                                                                        | 4502  | 254 | 206.36 | 1.23 | + 3.50E-04 | 1.68E-02 |
| establishment of localization                                                                    | 4653  | 259 | 213.28 | 1.21 | + 6.43E-04 | 3.00E-02 |
| localization                                                                                     | 8804  | 323 | 266.08 | 1.21 | + 7.78E-05 | 5.20E-03 |
| oxidative phosphorylation                                                                        | 120   | 21  | 5.50   | 3.82 | + 9.06E-07 | 1.07E-04 |
| generation of precursor metabolites and energy                                                   | 402   | 45  | 18.43  | 2.44 | + 2.37E-07 | 3.34E-05 |
| intracellular transport                                                                          | 1500  | 116 | 68.75  | 1.69 | + 1.25E-07 | 1.94E-05 |
| establishment of localization in cell                                                            | 2365  | 166 | 108.40 | 1.53 | + 6.76E-08 | 1.15E-05 |
| cellular localization                                                                            | 3006  | 196 | 137.78 | 1.42 | + 6.45E-07 | 8.07E-05 |
| activation of protein kinase B activity                                                          | 33    | 8   | 1.51   | 5.29 | + 3.48E-04 | 1.85E-02 |
| regulation of protein modification process                                                       | 1636  | 106 | 74.99  | 1.41 | + 6.03E-04 | 2.85E-02 |
| regulation of cellular protein metabolic process                                                 | 2442  | 165 | 112.16 | 1.47 | + 9.04E-07 | 1.07E-04 |
| regulation of protein metabolic process                                                          | 2605  | 174 | 118.40 | 1.46 | + 8.02E-07 | 9.58E-05 |
| positive regulation of cellular protein metabolic process                                        | 1452  | 92  | 66.78  | 1.45 | + 3.88E-04 | 2.01E-02 |
| positive regulation of protein metabolic process                                                 | 1539  | 101 | 70.54  | 1.43 | + 5.32E-04 | 2.57E-02 |
| regulation of transferase activity                                                               | 3027  | 73  | 47.07  | 1.55 | + 4.70E-04 | 2.34E-02 |
| regulation of molecular function                                                                 | 3180  | 190 | 145.76 | 1.30 | + 1.68E-04 | 1.01E-02 |
| positive regulation of catalytic activity                                                        | 1415  | 95  | 64.86  | 1.46 | + 3.27E-04 | 1.80E-02 |
| cytoplasmic translation                                                                          | 75    | 18  | 3.44   | 5.24 | + 9.89E-08 | 1.56E-05 |
| translation                                                                                      | 384   | 42  | 17.80  | 2.87 | + 1.26E-08 | 2.62E-06 |
| peptide biosynthetic process                                                                     | 469   | 47  | 16.75  | 2.51 | + 7.71E-08 | 1.25E-05 |
| peptide metabolic process                                                                        | 527   | 50  | 24.61  | 2.03 | + 8.05E-06 | 7.47E-04 |
| amide biosynthetic process                                                                       | 528   | 50  | 24.20  | 2.07 | + 6.68E-06 | 6.35E-04 |
| gene expression                                                                                  | 2162  | 158 | 100.24 | 1.56 | + 7.71E-08 | 1.27E-05 |
| macromolecule metabolic process                                                                  | 6194  | 342 | 263.91 | 1.22 | + 1.89E-05 | 1.51E-03 |
| cellular macromolecule biosynthetic process                                                      | 3655  | 123 | 75.86  | 1.62 | + 3.24E-07 | 4.32E-05 |
| cellular macromolecule metabolic process                                                         | 4964  | 293 | 227.63 | 1.29 | + 2.18E-06 | 2.33E-04 |
| macromolecule biosynthetic process                                                               | 1696  | 122 | 77.74  | 1.63 | + 1.62E-07 | 2.45E-05 |
| SRP-dependent cotranslational protein targeting to membrane                                      | 96    | 23  | 4.40   | 5.00 | + 7.92E-09 | 1.76E-06 |
| protein targeting to ER                                                                          | 111   | 25  | 5.09   | 4.91 | + 1.04E-09 | 4.11E-07 |
| protein targeting                                                                                | 320   | 40  | 16.96  | 2.36 | + 2.28E-06 | 2.41E-04 |
| intracellular protein transport                                                                  | 974   | 83  | 44.64  | 1.86 | + 2.69E-07 | 3.66E-05 |
| cellular protein localization                                                                    | 1643  | 120 | 75.31  | 1.59 | + 1.06E-06 | 1.21E-04 |
| cellular macromolecule localization                                                              | 1649  | 121 | 75.58  | 1.60 | + 7.94E-07 | 9.56E-05 |
| macromolecule localization                                                                       | 2553  | 162 | 117.02 | 1.38 | + 3.72E-05 | 2.75E-03 |
| protein localization                                                                             | 2161  | 139 | 99.05  | 1.40 | + 7.99E-05 | 5.29E-03 |
| protein transport                                                                                | 1464  | 104 | 67.10  | 1.55 | + 2.14E-05 | 1.69E-03 |
| establishment of protein localization                                                            | 1559  | 110 | 71.46  | 1.54 | + 1.58E-05 | 1.32E-03 |
| peptide transport                                                                                | 1493  | 106 | 68.43  | 1.55 | + 1.80E-05 | 1.51E-03 |
| amide transport                                                                                  | 1527  | 108 | 69.99  | 1.51 | + 4.08E-05 | 3.00E-03 |
| nitrogen compound transport                                                                      | 1802  | 119 | 82.60  | 1.44 | + 1.10E-04 | 7.04E-03 |
| establishment of protein localization to endoplasmic reticulum                                   | 115   | 25  | 5.27   | 4.74 | + 1.95E-09 | 7.18E-07 |
| protein localization to endoplasmic reticulum                                                    | 142   | 25  | 6.51   | 3.84 | + 7.68E-08 | 1.28E-05 |
| protein localization to organelle                                                                | 291   | 65  | 36.26  | 1.79 | + 1.70E-05 | 1.40E-03 |
| establishment of protein localization to organelle                                               | 449   | 47  | 20.58  | 2.28 | + 1.04E-06 | 1.20E-04 |
| translational protein targeting to membrane                                                      | 101   | 23  | 4.63   | 4.97 | + 4.03E-09 | 1.18E-06 |
| protein targeting to membrane                                                                    | 183   | 27  | 8.39   | 3.22 | + 5.58E-07 | 7.15E-05 |
| establishment of protein localization to membrane                                                | 302   | 40  | 14.02  | 2.84 | + 2.58E-08 | 4.62E-06 |
| protein localization to membrane                                                                 | 532   | 52  | 24.61  | 2.11 | + 1.78E-06 | 1.97E-04 |
| ventricular septum morphogenesis                                                                 | 35    | 8   | 1.60   | 4.99 | + 4.89E-04 | 2.39E-02 |
| cardiac septum morphogenesis                                                                     | 65    | 11  | 2.98   | 3.69 | + 4.55E-04 |          |
