# Supplementary material
Source: PubMed Central journal article supplement (PMC8761390)
Supplement: NIHMS1710729-supplement-12.pdf [file NIHMS1710729-supplement-12.pdf]

Analysis Summary: Please report in publication 

Analysis Type: PANTHER Overrepresentation Test (Released 20210224)

Annotation Version and Release Date: GO Ontology database DOI: 10.5281/zenodo.4437524 Released 2021-01-01

Analyzed List:

Reference List:

Annotation Data Set:  GO biological process complete  

Test Type:  Fisher's Exact  Binomial

Correction:  Calculate False Discovery Rate  Use the Bonferroni correction for multiple testing  No correction

Results 

|                               |                                   |
|-------------------------------|-----------------------------------|
| Reference list                | upload_1                          |
| Uniquely Mapped IDs:          | 20595 out of 20595 552 out of 467 |
| Unmapped IDs:                 | 0 9                               |
| Multiple mapping information: | 0 15                              |

Neely 2021, suppl. Table 7A: Cluster 0 at E+L 0.1 μM

Export

Displaying only results for FDR P < 0.05. [click here to display all results](#)

| GO biological process complete                                                      | Homo sapiens (REF) | #     | expected | Fold Enrichment | z/ z  | raw P value | FDR      |
|-------------------------------------------------------------------------------------|--------------------|-------|----------|-----------------|-------|-------------|----------|
| SRP-dependent cotranslational protein targeting to membrane                         |                    | 96    | 75       | 2.18            | 34.45 | + 1.55E-78  | 6.09E-75 |
| protein targeting to ER                                                             |                    | 133   | 79       | 2.52            | 31.39 | + 1.74E-80  | 2.74E-76 |
| protein targeting                                                                   |                    | 370   | 90       | 8.39            | 10.73 | + 5.42E-59  | 4.50E-56 |
| intracellular protein transport                                                     |                    | 974   | 104      | 22.09           | 4.71  | + 2.19E-38  | 7.06E-36 |
| cellular protein localization                                                       |                    | 1643  | 122      | 37.26           | 3.27  | + 6.47E-31  | 1.48E-28 |
| cellular macromolecule localization                                                 |                    | 1649  | 123      | 37.39           | 3.29  | + 2.29E-31  | 5.32E-29 |
| cellular localization                                                               |                    | 3006  | 167      | 68.16           | 2.45  | + 7.80E-29  | 1.71E-26 |
| cellular process                                                                    |                    | 15487 | 421      | 351.17          | 1.20  | + 7.42E-16  | 1.06E-13 |
| localization                                                                        |                    | 5805  | 217      | 131.63          | 1.85  | + 1.66E-16  | 2.29E-14 |
| macromolecule localization                                                          |                    | 2553  | 136      | 57.89           | 2.35  | + 3.78E-21  | 8.41E-19 |
| protein localization                                                                |                    | 2161  | 131      | 49.00           | 2.67  | + 2.68E-25  | 6.03E-23 |
| intracellular transport                                                             |                    | 1500  | 129      | 34.01           | 3.79  | + 5.68E-39  | 1.87E-36 |
| establishment of localization in cell                                               |                    | 2365  | 155      | 53.63           | 2.89  | + 2.76E-34  | 6.92E-32 |
| establishment of localization                                                       |                    | 4653  | 198      | 105.51          | 1.88  | + 7.75E-21  | 1.27E-18 |
| transport                                                                           |                    | 4502  | 194      | 102.08          | 1.90  | + 5.02E-21  | 8.34E-19 |
| protein transport                                                                   |                    | 1464  | 110      | 33.20           | 3.31  | + 4.57E-28  | 9.62E-26 |
| reestablishment of protein localization                                             |                    | 1559  | 111      | 35.35           | 3.14  | + 1.76E-26  | 3.42E-24 |
| peptide transport                                                                   |                    | 1493  | 110      | 33.85           | 3.25  | + 2.16E-27  | 4.42E-25 |
| amide transport                                                                     |                    | 1527  | 110      | 34.63           | 3.18  | + 1.26E-26  | 2.52E-24 |
| nitrogen compound transport                                                         |                    | 1802  | 114      | 40.86           | 2.79  | + 3.53E-23  | 6.33E-21 |
| organic substance transport                                                         |                    | 2171  | 115      | 49.23           | 2.34  | + 1.43E-17  | 2.07E-15 |
| anion transport                                                                     |                    | 2288  | 119      | 51.88           | 2.29  | + 1.21E-17  | 1.77E-16 |
| ion transport                                                                       |                    | 2882  | 149      | 65.35           | 2.28  | + 2.59E-22  | 4.54E-20 |
| establishment of protein localization to endoplasmic reticulum                      |                    | 115   | 79       | 2.61            | 30.30 | + 1.33E-79  | 1.05E-75 |
| protein localization to endoplasmic reticulum                                       |                    | 142   | 79       | 3.22            | 24.53 | + 3.34E-74  | 8.77E-71 |
| protein localization to organelle                                                   |                    | 781   | 104      | 17.94           | 5.80  | + 7.87E-46  | 3.55E-43 |
| establishment of protein localization to organelle                                  |                    | 449   | 95       | 10.18           | 9.33  | + 1.17E-57  | 9.20E-55 |
| cotranslational protein targeting to membrane                                       |                    | 101   | 76       | 2.29            | 39.14 | + 1.03E-78  | 5.43E-75 |
| protein targeting to membrane                                                       |                    | 183   | 79       | 4.15            | 10.08 | + 1.80E-67  | 2.58E-64 |
| establishment of protein localization to membrane                                   |                    | 307   | 83       | 6.96            | 11.92 | + 2.12E-57  | 1.59E-54 |
| protein localization to membrane                                                    |                    | 537   | 88       | 12.18           | 7.23  | + 2.66E-45  | 1.10E-42 |
| mitochondrial electron transport, cytochrome c to oxygen                            |                    | 20    | 13       | 45              | 28.67 | + 1.02E-13  | 1.32E-11 |
| mitochondrial ATP synthesis coupled electron transport                              |                    | 89    | 41       | 2.02            | 20.32 | + 5.07E-36  | 1.48E-33 |
| ATP synthesis coupled electron transport                                            |                    | 90    | 41       | 2.04            | 20.09 | + 7.23E-36  | 2.07E-33 |
| respiratory electron transport chain                                                |                    | 108   | 41       | 2.45            | 16.74 | + 2.54E-33  | 6.07E-31 |
| electron transport chain                                                            |                    | 170   | 43       | 3.85            | 11.15 | + 8.12E-29  | 1.75E-26 |
| generation of precursor metabolites and energy                                      |                    | 402   | 59       | 9.12            | 6.47  | + 5.16E-28  | 1.07E-25 |
| cellular metabolic process                                                          |                    | 7571  | 315      | 171.68          | 1.83  | + 4.50E-40  | 1.51E-37 |
| metabolic process                                                                   |                    | 8334  | 317      | 188.98          | 1.68  | + 3.89E-32  | 9.17E-30 |
| cellular respiration                                                                |                    | 157   | 42       | 3.56            | 11.80 | + 5.39E-29  | 1.20E-26 |
| energy derivation by oxidation of organic compounds                                 |                    | 227   | 45       | 5.15            | 8.74  | + 2.95E-26  | 5.61E-24 |
| oxidative phosphorylation                                                           |                    | 120   | 51       | 2.72            | 18.74 | + 3.06E-43  | 1.12E-40 |
| phosphorylation                                                                     |                    | 1023  | 60       | 23.20           | 2.59  | + 7.34E-11  | 8.84E-09 |
| phosphate-containing compound metabolic process                                     |                    | 1907  | 75       | 43.24           | 1.73  | + 4.06E-06  | 3.77E-04 |
| sulfur metabolic process                                                            |                    | 1934  | 75       | 43.85           | 1.71  | + 6.82E-06  | 6.11E-04 |
| ATP metabolic process                                                               |                    | 206   | 53       | 4.67            | 11.35 | + 1.15E-35  | 3.23E-33 |
| aerobic electron transport chain                                                    |                    | 20    | 13       | 45              | 28.67 | + 1.02E-13  | 1.31E-11 |
| aerobic respiration                                                                 |                    | 77    | 18       | 1.75            | 10.31 | + 2.80E-12  | 3.32E-10 |
| viral transcription                                                                 |                    | 118   | 73       | 2.83            | 27.75 | + 1.99E-71  | 3.50E-68 |
| viral process                                                                       |                    | 849   | 115      | 19.25           | 5.97  | + 3.50E-52  | 2.21E-49 |
| biological process involved in symbiotic interaction                                |                    | 937   | 117      | 21.25           | 5.51  | + 8.05E-50  | 4.53E-47 |
| biological process involved in interspecies interaction between organisms           |                    | 2118  | 132      | 48.03           | 2.75  | + 1.36E-26  | 2.68E-24 |
| viral gene expression                                                               |                    | 172   | 78       | 3.90            | 19.49 | + 1.79E-65  | 2.18E-62 |
| nuclear-transcribed mRNA catabolic process, nonsense-mediated decay                 |                    | 120   | 75       | 2.72            | 27.56 | + 3.06E-73  | 6.88E-70 |
| nuclear-transcribed mRNA catabolic process                                          |                    | 196   | 79       | 4.44            | 17.88 | + 1.30E-65  | 1.71E-62 |
| mRNA catabolic process                                                              |                    | 216   | 79       | 4.90            | 16.13 | + 5.85E-63  | 5.77E-60 |
| negative regulation of gene expression                                              |                    | 2034  | 136      | 46.12           | 2.95  | + 2.19E-30  | 4.94E-28 |
| negative regulation of macromolecule metabolic process                              |                    | 2682  | 158      | 64.90           | 2.43  | + 7.69E-27  | 1.55E-24 |
| negative regulation of metabolic process                                            |                    | 3105  | 161      | 70.41           | 2.29  | + 1.36E-24  | 2.50E-22 |
| negative regulation of biological process                                           |                    | 5544  | 210      | 125.71          | 1.67  | + 1.59E-16  | 2.21E-14 |
| regulation of metabolic process                                                     |                    | 6854  | 244      | 155.42          | 1.57  | + 8.83E-17  | 1.26E-14 |
| regulation of macromolecule metabolic process                                       |                    | 6308  | 236      | 143.04          | 1.65  | + 1.05E-18  | 1.61E-16 |
| regulation of gene expression                                                       |                    | 4880  | 207      | 110.66          | 1.87  | + 4.89E-22  | 8.47E-20 |
| mRNA catabolic process                                                              |                    | 246   | 80       | 5.58            | 14.34 | + 1.72E-60  | 1.51E-57 |
| mRNA metabolic process                                                              |                    | 1599  | 144      | 36.26           | 3.97  | + 3.00E-46  | 1.39E-43 |
| nucleic acid metabolic process                                                      |                    | 2232  | 161      | 50.61           | 3.18  | + 1.04E-40  | 3.58E-38 |
| nucleobase-containing compound metabolic process                                    |                    | 2720  | 179      | 61.68           | 2.90  | + 7.07E-41  | 2.48E-38 |
| nucleotide metabolic process                                                        |                    | 2904  | 180      | 65.85           | 2.73  | + 8.83E-38  | 2.78E-35 |
| primary metabolic process                                                           |                    | 7365  | 261      | 167.00          | 1.56  | + 2.46E-18  | 3.73E-16 |
| cellular aromatic compound metabolic process                                        |                    | 2949  | 180      | 68.87           | 2.69  | + 6.31E-37  | 1.88E-34 |
| cellular nitrogen compound metabolic process                                        |                    | 3407  | 213      | 77.26           | 1.76  | + 2.97E-47  | 1.46E-44 |
| nitrogen compound metabolic process                                                 |                    | 6898  | 254      | 156.41          | 1.62  | + 6.67E-20  | 1.06E-17 |
| organic cyclic compound metabolic process                                           |                    | 3190  | 182      | 72.33           | 2.52  | + 1.22E-33  | 2.97E-31 |
| organic substance metabolic process                                                 |                    | 7879  | 269      | 178.66          | 1.51  | + 8.95E-17  | 1.26E-14 |
| macromolecule metabolic process                                                     |                    | 6194  | 237      | 140.45          | 1.69  | + 3.77E-20  | 6.08E-18 |
| cellular macromolecule catabolic process                                            |                    | 912   | 100      | 20.68           | 4.84  | + 9.78E-38  | 3.02E-35 |
| macromolecule catabolic process                                                     |                    | 1046  | 102      | 23.72           | 4.30  | + 1.68E-34  | 4.40E-32 |
| organic substance catabolic process                                                 |                    | 1762  | 111      | 39.95           | 2.78  | + 2.16E-22  | 3.83E-20 |
| catabolic process                                                                   |                    | 2085  | 119      | 47.28           | 2.52  | + 1.12E-20  | 1.82E-18 |
| cellular macromolecule metabolic process                                            |                    | 4964  | 201      | 112.56          | 1.79  | + 8.53E-19  | 1.32E-16 |
| cellular catabolic process                                                          |                    | 1798  | 117      | 40.77           | 2.87  | + 8.18E-25  | 1.52E-22 |
| nucleobase-containing compound catabolic process                                    |                    | 175   | 84       | 8.50            | 9.88  | + 1.69E-52  | 1.11E-49 |
| cellular nitrogen compound catabolic process                                        |                    | 425   | 84       | 9.64            | 8.72  | + 9.23E-49  | 4.85E-46 |
| heterocycle catabolic process                                                       |                    | 419   | 84       | 9.50            | 8.84  | + 3.48E-49  | 1.89E-46 |
| aromatic compound catabolic process                                                 |                    | 441   | 84       | 10.00           | 8.40  | + 1.17E-47  | 5.94E-45 |
| organic cyclic compound catabolic process                                           |                    | 469   | 84       | 10.63           | 7.90  | + 7.94E-46  | 3.48E-43 |
| mRNA metabolic process                                                              |                    | 624   | 119      | 15.74           | 7.56  | + 4.46E-64  | 4.69E-61 |
| negative regulation of protein neddylation                                          |                    | 5     | 3        | 11              | 26.46 | + 5.58E-04  | 3.20E-02 |
| regulation of cellular metabolic process                                            |                    | 8110  | 126      | 138.55          | 1.27  | + 2.73E-04  | 1.74E-02 |
| regulation of protein metabolic process                                             |                    | 2605  | 87       | 59.07           | 1.47  | + 2.56E-04  | 1.66E-02 |
| regulation of primary metabolic process                                             |                    | 5895  | 122      | 133.67          | 1.29  | + 1.56E-04  | 1.09E-02 |
| regulation of nitrogen compound metabolic process                                   |                    | 5692  | 168      | 129.07          | 1.30  | + 1.07E-04  | 7.68E-03 |
| negative regulation of protein modification by small protein conjugation or removal |                    | 91    | 9        | 2.05            | 4.36  | + 3.83E-04  | 2.33E-02 |
| negative regulation of nitrogen compound metabolic process                          |                    | 2392  | 86       | 54.24           | 1.59  | + 2.25E-05  | 1.90E-03 |
| negative regulation of cellular metabolic process                                   |                    | 2582  | 89       | 58.55           | 1.52  | + 7.53E-05  | 6.60E-03 |
| positive regulation of intrinsic apoptotic signaling pathway by p53 class mediator  |                    | 5     | 3        | 11              | 26.46 | + 5.58E-04  | 3.19E-02 |
| positive regulation of signal transduction by p53 class mediator                    |                    | 23    | 5        | 5.2             | 9.59  | + 3.38E-04  | 2.10E-02 |
| regulation of apoptotic signaling pathway                                           |                    | 347   | 20       | 7.87            | 2.54  | + 2.22E-04  | 1.47E-02 |
| regulation of intrinsic apoptotic signaling pathway                                 |                    | 158   | 14       | 3.58            | 3.91  | + 3.11E-05  | 2.54E-03 |
| regulation of intrinsic apoptotic signaling pathway by bax class mediator           |                    | 28    | 5        | 6.3             | 7.88  | + 7.46E-04  | 4.04E-02 |
| cerebral cortex regionalization                                                     |                    | 6     | 3        | 14              | 22.05 | + 8.24E-04  | 4.39E-02 |
| mitochondrial electron transport, ubiquinol to cytochrome c                         |                    | 14    | 7        | 3.2             | 22.05 | + 2.24E-07  | 2.15E-05 |
| regulation of development, heterochromatin                                          |                    | 8     | 4        | 18              | 22.05 | + 1.03E-04  | 7.42E-03 |
| ribosomal small subunit assembly                                                    |                    | 21    | 10       | 48              | 21.00 | + 7.63E-10  | 8.65E-08 |
| ribosome assembly                                                                   |                    | 64    | 19       | 145             | 13.09 | + 1.79E-14  | 2.37E-12 |
| organelle assembly                                                                  |                    | 781   | 33       | 17.71           | 1.86  | + 9.04E-04  | 4.75E-02 |
| organelle organization                                                              |                    | 3574  | 144      | 81.04           | 1.78  | + 2.12E-12  | 2.54E-10 |
| cellular component organization                                                     |                    | 5776  | 198      | 130.97          | 1.51  | + 6.02E-11  | 6.98E-09 |
| cellular component organization or biogenesis                                       |                    | 6000  | 248      | 136.05          | 1.82  | + 1.83E-26  | 3.52E-24 |
| cellular component assembly                                                         |                    | 2438  | 114      | 55.28           | 2.06  | + 1.38E-13  | 1.76E-11 |
| cellular component biogenesis                                                       |                    | 2201  | 167      | 61.25           | 2.73  | + 2.11E-34  | 5.38E-32 |
| ribosome biogenesis                                                                 |                    | 332   | 75       | 75.3            | 9.96  | + 5.32E-47  | 2.54E-44 |
| ribonucleoprotein complex biogenesis                                                |                    | 465   | 94       | 10.54           | 8.91  | + 1.67E-55  | 1.20E-52 |
| ribosomal small subunit biogenesis                                                  |                    | 75    | 19       | 1.70            | 11.17 | + 2.01E-13  | 2.50E-11 |
| ribonucleoprotein complex assembly                                                  |                    | 190   | 37       | 4.31            | 8.29  | + 1.56E-21  | 2.68E-19 |
| ribonucleoprotein complex subunit organization                                      |                    | 197   | 37       | 4.47            | 8.58  | + 4.60E-21  | 7.72E-19 |
| protein-containing complex subunit organization                                     |                    | 1582  | 107      | 35.87           | 2.98  | + 8.44E-24  | 1.53E-21 |
| cellular protein-containing complex assembly                                        |                    | 860   | 84       | 19.50           | 4.31  | + 2.86E-28  | 6.10E-26 |
| protein-containing complex assembly                                                 |                    | 1338  | 89       | 30.34           | 2.93  | + 3.13E-19  | 4.89E-17 |
| mitochondrial ATP synthesis coupled proton transport                                |                    | 19    | 9        | 4.3             | 20.89 | + 5.70E-09  | 6.24E-07 |
| ATP synthesis coupled proton transport                                              |                    | 24    | 9        | 5.4             | 16.54 | + 2.88E-08  | 2.95E-06 |
| ATP biosynthetic process                                                            |                    | 36    | 9        | 8.2             | 11.03 | + 5.23E-07  | 4.97E-05 |
| purine ribonucleotide biosynthetic process                                          |                    | 150   | 13       | 3.40            | 3.82  | + 7.32E-05  | 5.60E-03 |
| purine nucleotide biosynthetic process                                              |                    | 161   | 14       | 3.65            | 3.83  | + 3.77E-05  | 3.02E-03 |
| purine-containing compound biosynthetic process                                     |                    | 172   | 14       | 3.90            | 3.59  | + 7.33E-05  | 5.48E-03 |
| organic cyclic compound biosynthetic process                                        |                    | 1222  | 50       | 27.71           | 1.80  | + 1.06E-04  | 7.66E-03 |
| organic substance biosynthetic process                                              |                    | 2804  | 171      | 63.58           | 2.69  | + 1.15E-34  | 3.08E-32 |
| biosynthetic process                                                                |                    | 2862  | 172      | 64.90           | 2.65  | + 3.85E-34  | 9.49E-32 |
| heterocycle biosynthetic process                                                    |                    | 1076  | 48       | 24.40           | 1.97  | + 1.47E-05  | 1.26E-03 |
| cellular biosynthetic process                                                       |                    | 2709  | 169      | 61.43           | 2.75  | + 2.35E-35  | 6.39E-33 |
| cellular nitrogen compound biosynthetic process                                     |                    | 1575  | 149      | 35.71           | 4.17  | + 1.53E-50  | 8.95E-48 |
| organonitrogen compound metabolic process                                           |                    | 5254  | 188      | 119.14          | 1.58  | + 7.02E-12  | 8.26E-10 |
| aromatic compound biosynthetic process                                              |                    | 1056  | 48       | 24.63           | 1.95  | + 1.69E-05  | 1.43E-03 |
| organonitrogen compound biosynthetic process                                        |                    | 1380  | 127      | 31.29           | 4.06  | + 3.70E-41  | 1.33E-38 |
| nucleobase-containing compound biosynthetic process                                 |                    | 1003  | 47       | 22.74           | 2.07  | + 4.63E-06  | 4.25E-04 |
| purine nucleotide metabolic process                                                 |                    | 337   | 19       | 7.64            | 2.49  | + 4.10E-04  | 2.48E-02 |
| purine ribonucleotide metabolic process                                             |                    | 314   | 18       | 7.12            | 2.53  | + 4.80E-04  | 2.81E-02 |
| ribose phosphate metabolic process                                                  |                    | 342   | 19       | 7.75            | 2.45  | + 7.71E-04  | 4.14E-02 |
| ribonucleotide biosynthetic process                                                 |                    | 164   | 13       | 3.72            | 3.50  | + 1.68E-04  | 1.16E-02 |
| ribose phosphate biosynthetic process                                               |                    | 171   | 14       | 3.88            | 3.61  | + 6.92E-05  | 5.27     |



Analysis Summary: Please report in publication 

Analysis Type: PANTHER Overrepresentation Test (Released 20210224)

Annotation Version and Release Date: GO Ontology database DOI: 10.5281/zenodo.4437524 Released 2021-01-01

Analyzed List:  [Change](#)

Reference List:  [Change](#)

Annotation Data Set:   

Test Type:  Fisher's Exact  Binomial

Correction:  Calculate False Discovery Rate  Use the Bonferroni correction for multiple testing   No correction

Results 

|                               |                |                |
|-------------------------------|----------------|----------------|
| Uniquely Mapped IDs:          | Reference list | upload_1       |
| 20585                         | Out of 20595   | 330 out of 349 |
| Unmapped IDs:                 | 0              | 7              |
| Multiple mapping information: | 0              | 14             |

**Neely 2021, suppl. Table 7B: Cluster 1 at E+L 0.1 µM**

Export [HTML with user input ids](#) [JSON with user input ids](#)

Displaying only results for FDR P < 0.05, click here to display all results

| GO biological process complete                                                     | Homo sapiens (REF) | #   | expected | observed | Fold Enrichment | z-score  | raw P-value | FDR |
|------------------------------------------------------------------------------------|--------------------|-----|----------|----------|-----------------|----------|-------------|-----|
| negative regulation of protein neddylation                                         | 5                  | 3   | .08      | 35.41    | + 2.41E-04      | 1.61E-02 |             |     |
| regulation of metabolic process                                                    | 6854               | 178 | 116.15   | 1.52     | + 6.77E-11      | 8.89E-09 |             |     |
| regulation of macromolecule metabolic process                                      | 6308               | 172 | 106.89   | 1.61     | + 7.93E-13      | 1.13E-10 |             |     |
| regulation of macromolecule metabolic process                                      | 5692               | 126 | 96.46    | 1.31     | + 7.12E-04      | 4.10E-02 |             |     |
| negative regulation of macromolecule metabolic process                             | 2862               | 118 | 48.50    | 2.43     | + 1.76E-20      | 3.42E-18 |             |     |
| negative regulation of metabolic process                                           | 3105               | 118 | 52.62    | 2.24     | + 9.30E-18      | 1.61E-15 |             |     |
| negative regulation of biological process                                          | 5544               | 158 | 93.95    | 1.68     | + 3.86E-13      | 5.58E-11 |             |     |
| negative regulation of nitrogen compound metabolic process                         | 2392               | 70  | 40.53    | 1.73     | + 7.18E-06      | 6.47E-04 |             |     |
| negative regulation of cellular metabolic process                                  | 2582               | 68  | 43.75    | 1.55     | + 2.43E-04      | 1.61E-02 |             |     |
| negative regulation of cellular process                                            | 4312               | 112 | 83.24    | 1.35     | + 4.97E-04      | 3.06E-02 |             |     |
| positive regulation of intrinsic apoptotic signaling pathway by p53 class mediator | 5                  | 3   | .08      | 35.41    | + 2.41E-04      | 1.61E-02 |             |     |
| regulation of apoptotic process                                                    | 1479               | 43  | 25.06    | 1.72     | + 7.74E-04      | 4.41E-02 |             |     |
| regulation of programmed cell death                                                | 1517               | 45  | 25.71    | 1.75     | + 2.93E-04      | 1.88E-02 |             |     |
| regulation of cell death                                                           | 1654               | 47  | 28.03    | 1.68     | + 6.96E-04      | 4.03E-02 |             |     |
| regulation of intrinsic apoptotic signaling pathway                                | 158                | 10  | 2.68     | 3.73     | + 5.33E-04      | 3.25E-02 |             |     |
| regulation of intrinsic apoptotic signaling pathway by p53 class mediator          | 28                 | 5   | .47      | 10.54    | + 2.02E-04      | 1.40E-02 |             |     |
| SRP-dependent cotranslational protein targeting to membrane                        | 96                 | 52  | 1.63     | 31.96    | + 5.49E-55      | 2.61E-51 |             |     |
| protein targeting to ER                                                            | 111                | 55  | 1.88     | 29.34    | + 1.61E-56      | 2.54E-52 |             |     |
| protein targeting                                                                  | 320                | 67  | 6.27     | 10.69    | + 6.62E-45      | 9.49E-42 |             |     |
| intracellular protein transport                                                    | 974                | 77  | 16.51    | 4.67     | + 7.17E-29      | 2.02E-26 |             |     |
| cellular protein localization                                                      | 1643               | 84  | 27.84    | 3.02     | + 1.32E-19      | 2.48E-17 |             |     |
| cellular macromolecule localization                                                | 1649               | 84  | 27.94    | 3.01     | + 1.64E-19      | 3.01E-17 |             |     |
| cellular localization                                                              | 3006               | 122 | 50.94    | 2.40     | + 6.87E-21      | 1.39E-18 |             |     |
| cellular process                                                                   | 16487              | 329 | 262.44   | 1.25     | + 9.00E-21      | 1.80E-18 |             |     |
| localization                                                                       | 5805               | 156 | 98.37    | 1.59     | + 9.51E-11      | 1.24E-08 |             |     |
| macromolecule localization                                                         | 2553               | 95  | 43.26    | 2.20     | + 1.98E-13      | 2.89E-11 |             |     |
| protein localization                                                               | 2161               | 93  | 36.62    | 2.54     | + 5.31E-17      | 9.11E-15 |             |     |
| intracellular transport                                                            | 1500               | 100 | 25.42    | 3.93     | + 2.99E-32      | 1.37E-29 |             |     |
| reestablishment of localization in cell                                            | 2365               | 116 | 40.08    | 2.89     | + 2.38E-26      | 5.61E-24 |             |     |
| establishment of localization                                                      | 4653               | 143 | 78.85    | 1.81     | + 3.37E-14      | 5.02E-12 |             |     |
| transport                                                                          | 4502               | 140 | 76.29    | 1.84     | + 2.87E-14      | 4.31E-12 |             |     |
| protein transport                                                                  | 1464               | 82  | 24.81    | 3.31     | + 1.87E-21      | 3.94E-19 |             |     |
| establishment of protein localization                                              | 1559               | 82  | 26.42    | 3.10     | + 7.75E-20      | 1.47E-17 |             |     |
| vesicle transport                                                                  | 1493               | 82  | 25.30    | 3.24     | + 6.04E-21      | 1.24E-18 |             |     |
| amide transport                                                                    | 1522               | 82  | 25.88    | 3.17     | + 2.29E-20      | 4.40E-18 |             |     |
| nitrogen compound transport                                                        | 1802               | 83  | 30.54    | 2.72     | + 9.36E-17      | 1.59E-14 |             |     |
| organic substance transport                                                        | 2171               | 84  | 36.79    | 2.28     | + 8.40E-13      | 1.18E-10 |             |     |
| anion transport                                                                    | 2288               | 85  | 38.77    | 2.19     | + 5.27E-12      | 7.16E-10 |             |     |
| ion transport                                                                      | 2882               | 110 | 48.84    | 2.25     | + 1.26E-16      | 2.09E-14 |             |     |
| establishment of protein localization to endoplasmic reticulum                     | 115                | 55  | 1.95     | 28.22    | + 7.41E-56      | 5.84E-52 |             |     |
| protein localization to endoplasmic reticulum                                      | 142                | 55  | 2.41     | 22.86    | + 7.60E-52      | 2.40E-48 |             |     |
| protein localization to organelle                                                  | 791                | 68  | 13.40    | 5.07     | + 2.26E-27      | 5.66E-25 |             |     |
| establishment of protein localization to organelle                                 | 449                | 64  | 7.61     | 8.41     | + 2.86E-37      | 2.05E-34 |             |     |
| cotranslational protein targeting to membrane                                      | 101                | 53  | 1.71     | 30.97    | + 1.75E-55      | 9.21E-52 |             |     |
| protein targeting to membrane                                                      | 183                | 55  | 3.10     | 17.74    | + 6.74E-47      | 1.18E-43 |             |     |
| establishment of protein localization to membrane                                  | 302                | 58  | 5.20     | 11.15    | + 1.07E-39      | 9.35E-37 |             |     |
| protein localization to membrane                                                   | 537                | 59  | 9.10     | 6.48     | + 4.40E-29      | 2.32E-26 |             |     |
| mitochondrial ATP synthesis coupled proton transport                               | 19                 | 9   | .32      | 27.95    | + 4.67E-10      | 5.58E-08 |             |     |
| ATP synthesis coupled proton transport                                             | 24                 | 9   | .41      | 22.13    | + 2.42E-09      | 2.79E-07 |             |     |
| ATP biosynthetic process                                                           | 36                 | 10  | .61      | 16.39    | + 3.47E-09      | 3.89E-07 |             |     |
| purine ribonucleotide biosynthetic process                                         | 150                | 10  | 2.54     | 3.93     | + 3.63E-04      | 2.30E-02 |             |     |
| purine nucleotide biosynthetic process                                             | 161                | 10  | 2.73     | 3.67     | + 6.12E-04      | 3.66E-02 |             |     |
| purine-containing compound biosynthetic process                                    | 122                | 51  | 2.91     | 3.77     | + 2.62E-04      | 1.72E-02 |             |     |
| organic cyclic compound biosynthetic process                                       | 1222               | 44  | 20.71    | 2.12     | + 3.81E-06      | 3.55E-04 |             |     |
| organic cyclic compound metabolic process                                          | 3190               | 145 | 54.06    | 2.68     | + 8.92E-31      | 3.13E-28 |             |     |
| organic substance metabolic process                                                | 2879               | 208 | 133.52   | 1.56     | + 2.05E-15      | 3.37E-13 |             |     |
| metabolic process                                                                  | 8334               | 251 | 141.23   | 1.78     | + 6.21E-32      | 2.80E-29 |             |     |
| organic substance biosynthetic process                                             | 2804               | 130 | 47.52    | 2.74     | + 9.10E-28      | 2.31E-25 |             |     |
| biosynthetic process                                                               | 2862               | 130 | 48.50    | 2.68     | + 6.08E-27      | 1.48E-24 |             |     |
| heterocycle biosynthetic process                                                   | 1076               | 42  | 18.23    | 2.30     | + 8.38E-07      | 8.11E-05 |             |     |
| heterocycle metabolic process                                                      | 2904               | 162 | 49.21    | 2.89     | + 2.74E-33      | 1.44E-30 |             |     |
| cellular metabolic process                                                         | 2671               | 248 | 128.30   | 1.93     | + 6.38E-38      | 4.79E-35 |             |     |
| cellular biosynthetic process                                                      | 2709               | 128 | 45.91    | 2.79     | + 5.08E-28      | 1.31E-25 |             |     |
| cellular nitrogen compound biosynthetic process                                    | 1676               | 108 | 26.69    | 4.05     | + 3.84E-36      | 2.42E-33 |             |     |
| cellular nitrogen compound metabolic process                                       | 3402               | 161 | 57.73    | 2.79     | + 3.84E-37      | 2.64E-34 |             |     |
| nitrogen compound metabolic process                                                | 6888               | 199 | 116.89   | 1.70     | + 5.61E-19      | 1.02E-16 |             |     |
| purine-containing compound metabolic process                                       | 359                | 16  | 6.08     | 2.63     | + 6.00E-04      | 3.60E-02 |             |     |
| organonitrogen compound metabolic process                                          | 5254               | 145 | 89.03    | 1.63     | + 1.25E-10      | 1.62E-08 |             |     |
| cellular aromatic compound metabolic process                                       | 2849               | 143 | 49.07    | 2.86     | + 3.44E-33      | 1.75E-30 |             |     |
| aromatic compound biosynthetic process                                             | 1086               | 42  | 18.40    | 2.28     | + 1.02E-06      | 9.76E-05 |             |     |
| organonitrogen compound biosynthetic process                                       | 1380               | 91  | 23.09    | 3.89     | + 8.41E-29      | 2.29E-26 |             |     |
| nucleobase-containing compound metabolic process                                   | 2720               | 138 | 46.99    | 2.99     | + 8.53E-34      | 4.80E-31 |             |     |
| primary metabolic process                                                          | 2365               | 202 | 124.81   | 1.62     | + 1.15E-16      | 1.92E-14 |             |     |
| phosphate-containing compound metabolic process                                    | 1902               | 58  | 32.32    | 1.79     | + 1.68E-05      | 1.46E-03 |             |     |
| phosphorus metabolic process                                                       | 1934               | 58  | 32.77    | 1.77     | + 2.82E-05      | 2.30E-03 |             |     |
| nucleobase-containing compound biosynthetic process                                | 1003               | 38  | 17.00    | 2.24     | + 8.23E-06      | 7.34E-04 |             |     |
| ribonucleotide biosynthetic process                                                | 164                | 10  | 2.78     | 3.60     | + 7.01E-04      | 4.05E-02 |             |     |
| ATP metabolic process                                                              | 206                | 46  | 3.49     | 13.18    | + 2.59E-34      | 1.51E-31 |             |     |
| purine ribonucleoside triphosphate biosynthetic process                            | 47                 | 10  | .80      | 12.56    | + 3.13E-08      | 3.40E-06 |             |     |
| purine nucleoside triphosphate biosynthetic process                                | 48                 | 10  | .81      | 12.29    | + 3.72E-08      | 4.02E-06 |             |     |
| nucleoside triphosphate biosynthetic process                                       | 66                 | 10  | 1.10     | 9.08     | + 4.60E-07      | 4.62E-05 |             |     |
| nucleoside triphosphate metabolic process                                          | 91                 | 10  | 1.54     | 6.48     | + 7.28E-06      | 6.52E-04 |             |     |
| purine nucleoside triphosphate metabolic process                                   | 67                 | 10  | 1.14     | 8.81     | + 5.92E-07      | 5.90E-05 |             |     |
| ribonucleoside triphosphate biosynthetic process                                   | 53                 | 10  | .90      | 11.13    | + 8.47E-08      | 8.97E-06 |             |     |
| ribonucleoside triphosphate metabolic process                                      | 68                 | 10  | 1.15     | 8.68     | + 6.69E-07      | 6.55E-05 |             |     |
| purine ribonucleoside triphosphate metabolic process                               | 61                 | 10  | 1.03     | 9.67     | + 2.72E-07      | 2.79E-05 |             |     |
| energy coupled proton transport, down electrochemical gradient                     | 24                 | 9   | .41      | 22.13    | + 2.42E-09      | 2.77E-07 |             |     |
| nitron transmembrane transport                                                     | 134                | 19  | 2.27     | 8.37     | + 1.10E-11      | 1.48E-09 |             |     |
| inorganic cation transmembrane transport                                           | 672                | 23  | 9.69     | 2.37     | + 2.17E-04      | 1.48E-02 |             |     |
| transmembrane transport                                                            | 1292               | 39  | 21.89    | 1.78     | + 5.53E-04      | 3.36E-02 |             |     |
| oxidative phosphorylation                                                          | 120                | 43  | 2.03     | 21.15    | + 2.11E-39      | 1.75E-36 |             |     |
| generation of exocyclic metabolites and energy                                     | 402                | 53  | 6.81     | 7.78     | + 2.42E-29      | 7.19E-27 |             |     |
| phosphorylation                                                                    | 1023               | 47  | 17.34    | 2.71     | + 1.25E-09      | 1.46E-07 |             |     |
| mitochondrial transmembrane transport                                              | 105                | 12  | 1.78     | 6.74     | + 6.07E-07      | 6.02E-05 |             |     |
| mitochondrial transport                                                            | 229                | 18  | 3.88     | 4.64     | + 1.94E-07      | 1.99E-05 |             |     |
| viral transcription                                                                | 116                | 51  | 1.97     | 25.94    | + 2.58E-50      | 5.09E-47 |             |     |
| viral process                                                                      | 849                | 76  | 14.39    | 5.28     | + 9.30E-32      | 3.96E-29 |             |     |
| biological process involved in symbiotic interaction                               | 937                | 79  | 15.88    | 4.98     | + 2.08E-31      | 8.19E-29 |             |     |
| biological process involved in interspecies interaction between organisms          | 2118               | 97  | 35.89    | 2.70     | + 1.36E-19      | 2.52E-17 |             |     |
| viral gene expression                                                              | 172                | 51  | 2.91     | 17.50    | + 3.08E-43      | 3.74E-40 |             |     |
| nuclear-transcribed mRNA catabolic process, nonsense-mediated decay                | 120                | 52  | 2.03     | 25.57    | + 4.84E-51      | 1.27E-47 |             |     |
| nuclear-transcribed mRNA catabolic process                                         | 198                | 53  | 3.32     | 15.96    | + 3.57E-43      | 4.02E-40 |             |     |
| mRNA catabolic process                                                             | 216                | 53  | 3.66     | 14.48    | + 2.60E-41      | 2.56E-38 |             |     |
| negative regulation of gene expression                                             | 2034               | 98  | 34.47    | 2.84     | + 2.60E-21      | 5.39E-19 |             |     |
| regulation of gene expression                                                      | 4880               | 150 | 82.70    | 1.81     | + 4.21E-15      | 6.45E-13 |             |     |
| RNA catabolic process                                                              | 246                | 53  | 4.17     | 12.71    | + 8.31E-39      | 6.56E-36 |             |     |
| RNA metabolic process                                                              | 1599               | 102 | 27.10    | 3.76     | + 1.88E-31      | 7.61E-29 |             |     |
| nucleic acid metabolic process                                                     | 2232               | 118 | 37.82    | 3.12     | + 1.11E-29      | 3.45E-27 |             |     |
| macromolecule metabolic process                                                    | 6194               | 177 | 104.96   | 1.69     | + 2.07E-15      | 3.37E-13 |             |     |
| cellular macromolecule catabolic process                                           | 912                | 68  | 15.45    | 4.40     | + 4.64E-24      | 1.05E-21 |             |     |
| macromolecule catabolic process                                                    | 1046               | 70  | 17.73    | 3.95     | + 2.98E-22      | 6.35E-20 |             |     |
| organic substance catabolic process                                                | 1762               | 79  | 29.86    | 2.65     | + 2.64E-15      | 4.13E-13 |             |     |
| catabolic process                                                                  | 2085               | 88  | 35.33    | 2.49     | + 2.15E-15      | 3.46E-13 |             |     |
| cellular macromolecule metabolic process                                           | 4964               | 149 | 84.12    | 1.77     | + 4.69E-14      | 6.91E-12 |             |     |
| cellular catabolic process                                                         | 1798               | 85  | 30.47    | 2.79     | + 7.85E-18      | 1.38E-15 |             |     |
| nucleobase-containing compound catabolic process                                   | 375                | 56  | 6.35     | 8.81     | + 1.59E-33      | 8.65E-31 |             |     |
| cellular nitrogen compound catabolic process                                       | 425                | 56  | 7.20     | 7.78     | + 5.50E-31      | 2.02E-28 |             |     |
| heterocycle catabolic process                                                      | 419                | 56  | 7.10     | 7.89     | + 2.84E-31      | 1.09E-28 |             |     |
| aromatic compound catabolic process                                                | 441                | 56  | 7.47     | 7.49     | + 3.06E-30      | 9.86E-28 |             |     |
| organic cyclic compound catabolic process                                          | 469                | 56  | 7.95     | 7.05     | + 5.30E-29      | 1.52E-26 |             |     |
| mRNA catabolic process                                                             | 694                | 81  | 11.76    | 6.89     | + 1.33E-41      | 1.40E-38 |             |     |
| mitochondrial electron transport, ubiquinol to cytochrome c                        | 14                 | 6   | .24      | 25.29    | + 6.53E-07      | 6.43E-05 |             |     |
| respiratory electron transport chain                                               | 108                | 34  | 1.83     | 18.58    | + 9.46E-30      | 2.98E-27 |             |     |
| electron transport chain                                                           | 170                | 38  | 2.88     | 13.19    | + 1.80E-28      | 4.73E-26 |             |     |
| cellular respiration                                                               | 157                | 3   |          |          |                 |          |             |     |



New [Enhancer-Gene Map](#) [PANTHER16.0 Released.](#)

Analysis Summary: Please report in publication [?](#)

|                                                                                                                  |                                                                                                                                                                                     |
|------------------------------------------------------------------------------------------------------------------|-------------------------------------------------------------------------------------------------------------------------------------------------------------------------------------|
| <b>Analysis Type:</b> PANTHER Overrepresentation Test (Released 20210224)                                        |                                                                                                                                                                                     |
| <b>Annotation Version and Release Date:</b> GO Ontology database DOI: 10.5281/zenodo.4437524 Released 2021-01-01 |                                                                                                                                                                                     |
| <b>Analyzed List:</b>                                                                                            | upload_1 (Homo sapiens) <a href="#">Change</a>                                                                                                                                      |
| <b>Reference List:</b>                                                                                           | Homo sapiens (all genes in database) <a href="#">Change</a>                                                                                                                         |
| <b>Annotation Data Set:</b>                                                                                      | <input type="text" value="GO biological process complete"/> <a href="#">?</a>                                                                                                       |
| <b>Test Type:</b>                                                                                                | <input type="radio"/> Fisher's Exact <input type="radio"/> Binomial                                                                                                                 |
| <b>Correction:</b>                                                                                               | <input type="radio"/> Calculate False Discovery Rate <input type="radio"/> Use the Bonferroni correction for multiple testing <a href="#">?</a> <input type="radio"/> No correction |

Results [?](#)

|                               | Reference list                     | upload_1                   |
|-------------------------------|------------------------------------|----------------------------|
| Uniquely Mapped IDs:          | <a href="#">20595</a> out of 20595 | <a href="#">5</a> out of 5 |
| Unmapped IDs:                 | <a href="#">0</a>                  | <a href="#">0</a>          |
| Multiple mapping information: | 0                                  | <a href="#">0</a>          |

## Neely 2021, suppl. Table 7C: Cluster 5 at E+L 0.1 μM

Export [Table](#) [XML with user input ids](#) [JSON with user input ids](#)

Displaying only results for FDR P < 0.05, [click here to display all results](#)

|                                                                                     | Homo sapiens (REF)  | upload_1 (▼ Hierarchy NEW! <a href="#">?</a> ) |          |                 |     |             |          |
|-------------------------------------------------------------------------------------|---------------------|------------------------------------------------|----------|-----------------|-----|-------------|----------|
|                                                                                     | #                   | #                                              | expected | Fold Enrichment | +/- | raw P value | FDR      |
| <a href="#">GO biological process complete</a>                                      |                     |                                                |          |                 |     |             |          |
| <a href="#">SRP-dependent cotranslational protein targeting to membrane</a>         | <a href="#">96</a>  | <a href="#">3</a>                              | .02      | > 100           | +   | 1.07E-06    | 1.69E-02 |
| ↳ <a href="#">protein targeting to ER</a>                                           | <a href="#">111</a> | <a href="#">3</a>                              | .03      | > 100           | +   | 1.64E-06    | 8.61E-03 |
| ↳ <a href="#">protein targeting</a>                                                 | <a href="#">370</a> | <a href="#">3</a>                              | .09      | 33.40           | +   | 5.73E-05    | 5.02E-02 |
| ↳ <a href="#">establishment of protein localization to endoplasmic reticulum</a>    | <a href="#">115</a> | <a href="#">3</a>                              | .03      | > 100           | +   | 1.82E-06    | 7.16E-03 |
| ↳ <a href="#">protein localization to endoplasmic reticulum</a>                     | <a href="#">142</a> | <a href="#">3</a>                              | .03      | 87.02           | +   | 3.38E-06    | 7.62E-03 |
| ↳ <a href="#">cotranslational protein targeting to membrane</a>                     | <a href="#">101</a> | <a href="#">3</a>                              | .02      | > 100           | +   | 1.24E-06    | 9.79E-03 |
| ↳ <a href="#">protein targeting to membrane</a>                                     | <a href="#">183</a> | <a href="#">3</a>                              | .04      | 67.52           | +   | 7.15E-06    | 1.13E-02 |
| ↳ <a href="#">establishment of protein localization to membrane</a>                 | <a href="#">307</a> | <a href="#">3</a>                              | .07      | 40.25           | +   | 3.30E-05    | 3.25E-02 |
| <a href="#">viral transcription</a>                                                 | <a href="#">116</a> | <a href="#">3</a>                              | .03      | > 100           | +   | 1.86E-06    | 5.88E-03 |
| ↳ <a href="#">viral gene expression</a>                                             | <a href="#">172</a> | <a href="#">3</a>                              | .04      | 71.84           | +   | 5.95E-06    | 1.04E-02 |
| <a href="#">nuclear-transcribed mRNA catabolic process, nonsense-mediated decay</a> | <a href="#">120</a> | <a href="#">3</a>                              | .03      | > 100           | +   | 2.06E-06    | 5.41E-03 |
| ↳ <a href="#">nuclear-transcribed mRNA catabolic process</a>                        | <a href="#">196</a> | <a href="#">3</a>                              | .05      | 63.05           | +   | 8.75E-06    | 1.26E-02 |
| ↳ <a href="#">mRNA catabolic process</a>                                            | <a href="#">216</a> | <a href="#">3</a>                              | .05      | 57.21           | +   | 1.17E-05    | 1.53E-02 |
| ↳ <a href="#">RNA catabolic process</a>                                             | <a href="#">246</a> | <a href="#">3</a>                              | .06      | 50.23           | +   | 1.71E-05    | 2.08E-02 |
| ↳ <a href="#">nucleobase-containing compound catabolic process</a>                  | <a href="#">375</a> | <a href="#">3</a>                              | .09      | 32.95           | +   | 5.96E-05    | 4.95E-02 |
| <a href="#">translational initiation</a>                                            | <a href="#">143</a> | <a href="#">3</a>                              | .03      | 86.41           | +   | 3.45E-06    | 6.80E-03 |
| <a href="#">rRNA processing</a>                                                     | <a href="#">260</a> | <a href="#">3</a>                              | .06      | 47.53           | +   | 2.02E-05    | 2.27E-02 |
| ↳ <a href="#">rRNA metabolic process</a>                                            | <a href="#">270</a> | <a href="#">3</a>                              | .07      | 45.77           | +   | 2.26E-05    | 2.37E-02 |
| ↳ <a href="#">ribosome biogenesis</a>                                               | <a href="#">332</a> | <a href="#">3</a>                              | .08      | 37.22           | +   | 4.16E-05    | 3.86E-02 |

Analysis Summary: Please report in publication [?](#)

|                                                                                                                  |                                                                                                                                                                                                |
|------------------------------------------------------------------------------------------------------------------|------------------------------------------------------------------------------------------------------------------------------------------------------------------------------------------------|
| <b>Analysis Type:</b> PANTHER Overrepresentation Test (Released 20210224)                                        |                                                                                                                                                                                                |
| <b>Annotation Version and Release Date:</b> GO Ontology database DOI: 10.5281/zenodo.4437524 Released 2021-01-01 |                                                                                                                                                                                                |
| <b>Analyzed List:</b>                                                                                            | upload_1 (Homo sapiens) <a href="#">Change</a>                                                                                                                                                 |
| <b>Reference List:</b>                                                                                           | Homo sapiens (all genes in database) <a href="#">Change</a>                                                                                                                                    |
| <b>Annotation Data Set:</b>                                                                                      | <input checked="" type="checkbox"/> GO biological process complete <a href="#">?</a>                                                                                                           |
| <b>Test Type:</b>                                                                                                | <input checked="" type="radio"/> Fisher's Exact <input type="radio"/> Binomial                                                                                                                 |
| <b>Correction:</b>                                                                                               | <input checked="" type="radio"/> Calculate False Discovery Rate <input type="radio"/> Use the Bonferroni correction for multiple testing <a href="#">?</a> <input type="radio"/> No correction |

Results [?](#)

|                               |                                      |                          |
|-------------------------------|--------------------------------------|--------------------------|
| Uniquely Mapped IDs:          | Reference list<br>20595 out of 20595 | upload_1<br>60 out of 60 |
| Unmapped IDs:                 | 0                                    | 0                        |
| Multiple mapping information: | 0                                    | 0                        |

**Neely 2021, suppl. Table 7D: Cluster 2 at E+L 0.1 μM**

Export [Table](#) [XML with user input ids](#) [JSON with user input ids](#)

Displaying only results for FDR P < 0.05, [click here to display all results](#)

|                                                                                             | Homo sapiens (REF) |    | upload_1 (▼ Hierarchy NEW! <a href="#">?</a> ) |                     |             |          |
|---------------------------------------------------------------------------------------------|--------------------|----|------------------------------------------------|---------------------|-------------|----------|
|                                                                                             | #                  | #  | expected                                       | Fold Enrichment +/- | raw P value | FDR      |
| <a href="#">GO biological process complete</a>                                              |                    |    |                                                |                     |             |          |
| <a href="#">compartment pattern specification</a>                                           | 4                  | 2  | .01                                            | > 100               | + 1.24E-04  | 1.71E-02 |
| <a href="#">SRP-dependent cotranslational protein targeting to membrane</a>                 | 96                 | 23 | .28                                            | 82.24               | + 6.41E-37  | 1.01E-32 |
| ↳ <a href="#">protein targeting to ER</a>                                                   | 111                | 23 | .32                                            | 71.12               | + 1.26E-35  | 6.60E-32 |
| ↳ <a href="#">protein targeting</a>                                                         | 370                | 24 | 1.08                                           | 22.26               | + 5.15E-26  | 5.42E-23 |
| ↳ <a href="#">intracellular protein transport</a>                                           | 974                | 24 | 2.84                                           | 8.46                | + 1.37E-16  | 5.67E-14 |
| ↳ <a href="#">cellular protein localization</a>                                             | 1643               | 25 | 4.79                                           | 5.22                | + 1.30E-12  | 3.86E-10 |
| ↳ <a href="#">cellular macromolecule localization</a>                                       | 1649               | 25 | 4.80                                           | 5.20                | + 1.41E-12  | 3.96E-10 |
| ↳ <a href="#">cellular localization</a>                                                     | 3006               | 28 | 8.76                                           | 3.20                | + 3.50E-09  | 6.73E-07 |
| ↳ <a href="#">localization</a>                                                              | 5805               | 35 | 16.91                                          | 2.07                | + 1.70E-06  | 2.70E-04 |
| ↳ <a href="#">macromolecule localization</a>                                                | 2553               | 26 | 7.44                                           | 3.50                | + 2.72E-09  | 5.43E-07 |
| ↳ <a href="#">protein localization</a>                                                      | 2161               | 26 | 6.30                                           | 4.13                | + 7.33E-11  | 1.73E-08 |
| ↳ <a href="#">intracellular transport</a>                                                   | 1500               | 27 | 4.37                                           | 6.18                | + 1.86E-15  | 7.14E-13 |
| ↳ <a href="#">establishment of localization in cell</a>                                     | 2385               | 27 | 6.89                                           | 3.92                | + 8.58E-11  | 1.96E-08 |
| ↳ <a href="#">establishment of localization</a>                                             | 4653               | 33 | 13.56                                          | 2.43                | + 5.74E-08  | 1.01E-05 |
| ↳ <a href="#">transport</a>                                                                 | 4502               | 33 | 13.12                                          | 2.52                | + 2.47E-08  | 4.53E-06 |
| ↳ <a href="#">protein transport</a>                                                         | 1464               | 24 | 4.27                                           | 5.63                | + 9.16E-13  | 2.89E-10 |
| ↳ <a href="#">establishment of protein localization</a>                                     | 1559               | 24 | 4.54                                           | 5.28                | + 3.45E-12  | 8.92E-10 |
| ↳ <a href="#">peptide transport</a>                                                         | 1493               | 24 | 4.35                                           | 5.52                | + 1.39E-12  | 3.98E-10 |
| ↳ <a href="#">amide transport</a>                                                           | 1527               | 24 | 4.45                                           | 5.39                | + 2.23E-12  | 6.07E-10 |
| ↳ <a href="#">nitrogen compound transport</a>                                               | 1802               | 24 | 5.25                                           | 4.57                | + 7.01E-11  | 1.68E-08 |
| ↳ <a href="#">organic substance transport</a>                                               | 2171               | 24 | 6.32                                           | 3.79                | + 3.03E-09  | 5.90E-07 |
| ↳ <a href="#">anion transport</a>                                                           | 2288               | 24 | 6.67                                           | 3.60                | + 8.54E-09  | 1.60E-06 |
| ↳ <a href="#">ion transport</a>                                                             | 2882               | 31 | 8.40                                           | 3.69                | + 6.29E-12  | 1.58E-09 |
| ↳ <a href="#">establishment of protein localization to endoplasmic reticulum</a>            | 115                | 23 | .34                                            | 68.65               | + 2.61E-35  | 1.03E-31 |
| ↳ <a href="#">protein localization to endoplasmic reticulum</a>                             | 142                | 23 | .41                                            | 55.60               | + 2.12E-33  | 6.68E-30 |
| ↳ <a href="#">protein localization to organelle</a>                                         | 791                | 24 | 2.30                                           | 10.41               | + 1.37E-18  | 6.95E-16 |
| ↳ <a href="#">establishment of protein localization to organelle</a>                        | 449                | 24 | 1.31                                           | 18.35               | + 4.08E-24  | 3.58E-21 |
| ↳ <a href="#">cotranslational protein targeting to membrane</a>                             | 101                | 23 | .29                                            | 78.17               | + 1.81E-36  | 1.42E-32 |
| ↳ <a href="#">protein targeting to membrane</a>                                             | 183                | 23 | .53                                            | 43.14               | + 4.53E-31  | 7.94E-28 |
| ↳ <a href="#">establishment of protein localization to membrane</a>                         | 307                | 24 | .89                                            | 26.83               | + 7.62E-28  | 1.00E-24 |
| ↳ <a href="#">protein localization to membrane</a>                                          | 537                | 24 | 1.56                                           | 15.34               | + 2.32E-22  | 1.66E-19 |
| <a href="#">ribosomal small subunit assembly</a>                                            | 21                 | 4  | .06                                            | 65.38               | + 7.77E-07  | 1.28E-04 |
| ↳ <a href="#">ribosome assembly</a>                                                         | 64                 | 4  | .19                                            | 21.45               | + 4.56E-05  | 6.60E-03 |
| ↳ <a href="#">cellular component organization or biogenesis</a>                             | 6000               | 34 | 17.48                                          | 1.95                | + 1.08E-05  | 1.64E-03 |
| ↳ <a href="#">cellular component biogenesis</a>                                             | 2701               | 26 | 7.87                                           | 3.30                | + 8.97E-09  | 1.66E-06 |
| ↳ <a href="#">ribosome biogenesis</a>                                                       | 332                | 19 | .97                                            | 19.64               | + 1.58E-19  | 8.33E-17 |
| ↳ <a href="#">ribonucleoprotein complex biogenesis</a>                                      | 465                | 19 | 1.35                                           | 14.03               | + 6.31E-17  | 2.77E-14 |
| ↳ <a href="#">ribosomal small subunit biogenesis</a>                                        | 75                 | 6  | .22                                            | 27.46               | + 1.27E-07  | 2.18E-05 |
| <a href="#">viral transcription</a>                                                         | 116                | 22 | .34                                            | 65.10               | + 2.79E-33  | 7.33E-30 |
| ↳ <a href="#">viral process</a>                                                             | 849                | 23 | 2.47                                           | 9.30                | + 9.71E-17  | 4.14E-14 |
| ↳ <a href="#">biological process involved in symbiotic interaction</a>                      | 937                | 23 | 2.73                                           | 8.43                | + 7.78E-16  | 3.07E-13 |
| ↳ <a href="#">biological process involved in interspecies interaction between organisms</a> | 2118               | 24 | 6.17                                           | 3.89                | + 1.85E-09  | 3.95E-07 |
| ↳ <a href="#">viral gene expression</a>                                                     | 172                | 22 | .50                                            | 43.90               | + 7.71E-30  | 1.22E-26 |
| <a href="#">nuclear-transcribed mRNA catabolic process, nonsense-mediated decay</a>         | 120                | 22 | .35                                            | 62.93               | + 5.47E-33  | 1.23E-29 |
| ↳ <a href="#">nuclear-transcribed mRNA catabolic process</a>                                | 196                | 22 | .57                                            | 38.53               | + 1.11E-28  | 1.59E-25 |
| ↳ <a href="#">mRNA catabolic process</a>                                                    | 216                | 22 | .63                                            | 34.96               | + 8.11E-28  | 9.84E-25 |
| ↳ <a href="#">negative regulation of gene expression</a>                                    | 2034               | 23 | 5.93                                           | 3.88                | + 4.89E-09  | 9.29E-07 |
| ↳ <a href="#">negative regulation of macromolecule metabolic process</a>                    | 2862               | 26 | 8.34                                           | 3.12                | + 3.00E-08  | 5.37E-06 |
| ↳ <a href="#">negative regulation of metabolic process</a>                                  | 3105               | 26 | 9.05                                           | 2.87                | + 1.58E-07  | 2.69E-05 |
| ↳ <a href="#">negative regulation of biological process</a>                                 | 5544               | 30 | 16.15                                          | 1.86                | + 1.91E-04  | 2.59E-02 |
| ↳ <a href="#">regulation of gene expression</a>                                             | 4880               | 30 | 14.22                                          | 2.11                | + 1.07E-05  | 1.63E-03 |
| ↳ <a href="#">RNA catabolic process</a>                                                     | 246                | 22 | .72                                            | 30.70               | + 1.17E-26  | 1.32E-23 |
| ↳ <a href="#">RNA metabolic process</a>                                                     | 1599               | 27 | 4.66                                           | 5.80                | + 8.71E-15  | 2.92E-12 |
| ↳ <a href="#">nucleic acid metabolic process</a>                                            | 2232               | 28 | 6.50                                           | 4.31                | + 3.27E-12  | 8.59E-10 |
| ↳ <a href="#">nucleobase-containing compound metabolic process</a>                          | 2720               | 31 | 7.92                                           | 3.91                | + 1.36E-12  | 3.98E-10 |
| ↳ <a href="#">heterocycle metabolic process</a>                                             | 2904               | 31 | 8.46                                           | 3.66                | + 7.69E-12  | 1.89E-09 |
| ↳ <a href="#">cellular metabolic process</a>                                                | 7571               | 45 | 22.06                                          | 2.04                | + 2.62E-09  | 5.29E-07 |
| ↳ <a href="#">metabolic process</a>                                                         | 8334               | 45 | 24.28                                          | 1.85                | + 8.66E-08  | 1.50E-05 |
| ↳ <a href="#">cellular aromatic compound metabolic process</a>                              | 2949               | 31 | 8.59                                           | 3.61                | + 1.15E-11  | 2.79E-09 |
| ↳ <a href="#">cellular nitrogen compound metabolic process</a>                              | 3407               | 32 | 9.93                                           | 3.22                | + 8.51E-11  | 1.97E-08 |
| ↳ <a href="#">nitrogen compound metabolic process</a>                                       | 6898               | 35 | 20.10                                          | 1.74                | + 9.37E-05  | 1.31E-02 |
| ↳ <a href="#">organic cyclic compound metabolic process</a>                                 | 3190               | 31 | 9.29                                           | 3.34                | + 8.86E-11  | 2.00E-08 |
| ↳ <a href="#">macromolecule metabolic process</a>                                           | 6194               | 33 | 18.05                                          | 1.83                | + 6.09E-05  | 8.73E-03 |
| ↳ <a href="#">cellular macromolecule catabolic process</a>                                  | 912                | 22 | 2.66                                           | 8.28                | + 5.65E-15  | 1.98E-12 |
| ↳ <a href="#">macromolecule catabolic process</a>                                           | 1046               | 22 | 3.05                                           | 7.22                | + 8.70E-14  | 2.80E-11 |
| ↳ <a href="#">organic substance catabolic process</a>                                       | 1762               | 22 | 5.13                                           | 4.29                | + 1.98E-09  | 4.17E-07 |
| ↳ <a href="#">catabolic process</a>                                                         | 2085               | 22 | 6.07                                           | 3.62                | + 4.23E-08  | 7.49E-06 |
| ↳ <a href="#">cellular macromolecule metabolic process</a>                                  | 4964               | 32 | 14.46                                          | 2.21                | + 1.16E-06  | 1.86E-04 |
| ↳ <a href="#">cellular catabolic process</a>                                                | 1798               | 22 | 5.24                                           | 4.20                | + 2.88E-09  | 5.67E-07 |
| ↳ <a href="#">nucleobase-containing compound catabolic process</a>                          | 375                | 22 | 1.09                                           | 20.14               | + 7.11E-23  | 5.90E-20 |
| ↳ <a href="#">cellular nitrogen compound catabolic process</a>                              | 425                | 22 | 1.24                                           | 17.77               | + 9.45E-22  | 6.21E-19 |
| ↳ <a href="#">heterocycle catabolic process</a>                                             | 419                | 22 | 1.22                                           | 18.02               | + 7.04E-22  | 4.83E-19 |
| ↳ <a href="#">aromatic compound catabolic process</a>                                       | 441                | 22 | 1.28                                           | 17.12               | + 2.03E-21  | 1.28E-18 |
| ↳ <a href="#">organic cyclic compound catabolic process</a>                                 | 469                | 22 | 1.37                                           | 16.10               | + 7.22E-21  | 4.22E-18 |
| ↳ <a href="#">mRNA metabolic process</a>                                                    | 694                | 25 | 2.02                                           | 12.36               | + 3.81E-21  | 2.31E-18 |
| <a href="#">cytoplasmic translation</a>                                                     | 75                 | 12 | .22                                            | 54.92               | + 1.68E-17  | 8.04E-15 |
| ↳ <a href="#">translation</a>                                                               | 384                | 24 | 1.12                                           | 21.45               | + 1.19E-25  | 1.18E-22 |
| ↳ <a href="#">peptide biosynthetic process</a>                                              | 409                | 24 | 1.19                                           | 20.14               | + 4.96E-25  | 4.60E-22 |
| ↳ <a href="#">peptide metabolic process</a>                                                 | 537                | 24 | 1.56                                           | 15.34               | + 2.32E-22  | 1.74E-19 |
| ↳ <a href="#">organonitrogen compound metabolic process</a>                                 | 5254               | 31 | 15.31                                          | 2.03                | + 1.79E-05  | 2.67E-03 |
| ↳ <a href="#">cellular amide metabolic process</a>                                          | 808                | 24 | 2.35                                           | 10.20               | + 2.19E-18  | 1.08E-15 |
| ↳ <a href="#">amide biosynthetic process</a>                                                | 528                | 24 | 1.54                                           | 15.60               | + 1.58E-22  | 1.25E-19 |
| ↳ <a href="#">cellular nitrogen compound biosynthetic process</a>                           | 1575               | 29 | 4.59                                           | 6.32                | + 5.50E-17  | 2.48E-14 |
| ↳ <a href="#">cellular biosynthetic process</a>                                             | 2709               | 31 | 7.89                                           | 3.93                | + 1.22E-12  | 3.78E-10 |
| ↳ <a href="#">biosynthetic process</a>                                                      | 2862               | 31 | 8.34                                           | 3.72                | + 5.24E-12  | 1.33E-09 |
| ↳ <a href="#">organonitrogen compound biosynthetic process</a>                              | 1380               | 28 | 4.02                                           | 6.96                | + 2.09E-17  | 9.67E-15 |
| ↳ <a href="#">organic substance biosynthetic process</a>                                    | 2804               | 31 | 8.17                                           | 3.79                | + 3.05E-12  | 8.16E-10 |
| ↳ <a href="#">gene expression</a>                                                           | 2187               | 28 | 6.37                                           | 4.39                | + 2.00E-12  | 5.53E-10 |
| ↳ <a href="#">cellular macromolecule biosynthetic process</a>                               | 1655               | 28 | 4.82                                           | 5.81                | + 2.07E-15  | 7.77E-13 |
| ↳ <a href="#">macromolecule biosynthetic process</a>                                        | 1696               | 28 | 4.94                                           | 5.67                | + 3.82E-15  | 1.37E-12 |
| ↳ <a href="#">cellular protein metabolic process</a>                                        | 3644               | 28 | 10.62                                          | 2.64                | + 2.44E-07  | 4.09E-05 |
| ↳ <a href="#">protein metabolic process</a>                                                 | 4219               | 28 | 12.29                                          | 2.28                | + 6.10E-06  | 9.53E-04 |
| <a href="#">mitochondrial ATP synthesis coupled proton transport</a>                        | 19                 | 3  | .06                                            | 54.20               | + 3.45E-05  | 5.04E-03 |
| ↳ <a href="#">ATP synthesis coupled proton transport</a>                                    | 24                 | 3  | .07                                            | 42.91               | + 6.49E-05  | 9.22E-03 |
| ↳ <a href="#">ATP biosynthetic process</a>                                                  | 36                 | 3  | .10                                            | 28.60               | + 1.98E-04  | 2.66E-02 |
| ↳ <a href="#">ATP metabolic process</a>                                                     | 206                | 12 | .60                                            | 20.00               | + 1.26E-12  | 3.83E-10 |
| ↳ <a href="#">energy coupled proton transport, down electrochemical gradient</a>            | 24                 | 3  | .07                                            | 42.91               | + 6.49E-05  | 9.13E-03 |
| ↳ <a href="#">proton transmembrane transport</a>                                            | 134                | 6  | .39                                            | 15.37               | + 3.23E-06  | 5.09E-04 |
| ↳ <a href="#">oxidative phosphorylation</a>                                                 | 120                | 12 | .35                                            | 34.33               | + 3.01E-15  | 1.10E-12 |
| ↳ <a href="#">generation of precursor metabolites and energy</a>                            | 402                | 12 | 1.17                                           | 10.25               | + 2.11E-09  | 4.37E-07 |
| ↳ <a href="#">phosphorylation</a>                                                           | 1023               | 13 | 2.98                                           | 4.36                | + 6.76E-06  | 1.05E-03 |
| <a href="#">translational initiation</a>                                                    | 143                | 22 | .42                                            | 52.81               | + 1.84E-31  | 3.62E-28 |
| <a href="#">cristae formation</a>                                                           | 31                 | 3  | .09                                            | 33.22               | + 1.31E-04  | 1.79E-02 |
| ↳ <a href="#">inner mitochondrial membrane organization</a>                                 | 52                 | 4  | .15                                            | 26.40               | + 2.11E-05  | 3.11E-03 |
| ↳ <a href="#">mitochondrion organization</a>                                                | 457                | 10 | 1.33                                           | 7.51                | + 8.69E-07  | 1.41E-04 |
| <a href="#">mitochondrial electron transport, NADH to ubiquinone</a>                        | 49                 | 4  | .14                                            | 28.02               | + 1.69E-05  | 2.54E-03 |
| ↳ <a href="#">mitochondrial ATP synthesis coupled electron transport</a>                    | 89                 | 8  | .26                                            | 30.85               | + 3.69E-10  | 8.20E-08 |
| ↳ <a href="#">ATP synthesis coupled electron transport</a>                                  | 90                 | 8  | .26                                            | 30.51               | + 4.01E-10  | 8.78E-08 |
| ↳ <a href="#">respiratory electron transport chain</a>                                      | 108                | 8  | .31                                            | 25.43               | + 1.55E-09  | 3.36E-07 |
| ↳ <a href="#">electron transport chain</a>                                                  | 170                | 9  | .50                                            | 18.17               | + 2.28E-09  | 4.67E-07 |
| ↳ <a href="#">cellular respiration</a>                                                      | 157                | 8  | .46                                            | 17.49               | + 2.51E-08  | 4.56E-06 |
| ↳ <a href="#">energy derivation by oxidation of organic compounds</a>                       | 227                | 8  | .66                                            | 12.10               | + 3.83E-07  | 6.36E-05 |
| <a href="#">rRNA processing</a>                                                             | 260                | 18 | .76                                            | 23.76               | + 6.74E-20  | 3.79E-17 |
| ↳ <a href="#">ncRNA processing</a>                                                          | 432                | 18 | 1.26                                           | 14.30               | + 3.48E-16  | 1.41E-13 |
| ↳ <a href="#">RNA processing</a>                                                            | 923                | 21 | 2.69                                           | 7.81                | + 8.51E-14  | 2.80E-11 |
| ↳ <a href="#">ncRNA metabolic process</a>                                                   | 517                | 18 | 1.51                                           | 11.95               | + 7.01E-15  | 2.40E-12 |
| ↳ <a href="#">rRNA metabolic process</a>                                                    | 270                | 18 | .79                                            | 22.88               | + 1.27E-19  | 6.92E-17 |
| <a href="#">mitochondrial respiratory chain complex assembly</a>                            | 101                | 4  | .29                                            | 13.59               | + 2.47E-04  | 3.30E-02 |
| <a href="#">regulation of cellular process</a>                                              | 11308              | 19 | 32.94                                          | .58                 | - 3.73E-04  | 4.94E-02 |



New [Enhancer-Gene Map](#) [PANTHER16.0 Released](#).

Analysis Summary: Please report in publication [?](#)

**Analysis Type:** PANTHER Overrepresentation Test (Released 20210224)

---

**Annotation Version and Release Date:** GO Ontology database DOI: 10.5281/zenodo.4437524 Released 2021-01-01

---

**Analyzed List:** upload\_1 (Homo sapiens) [Change](#)

---

**Reference List:** Homo sapiens (all genes in database) [Change](#)

---

**Annotation Data Set:** GO biological process complete [?](#)

---

**Test Type:**  Fisher's Exact  Binomial

---

**Correction:**  Calculate False Discovery Rate  Use the Bonferroni correction for multiple testing [?](#)  No correction

Results [?](#)

|                               | Reference list     | upload_1     |
|-------------------------------|--------------------|--------------|
| Uniquely Mapped IDs:          | 20595 out of 20595 | 21 out of 22 |
| Unmapped IDs:                 | 0                  | 0            |
| Multiple mapping information: | 0                  | 1            |

Neely 2021, suppl. Table 7E: Cluster 3 at E+L 0.1 μM

Export [Table](#) [XML with user input ids](#) [JSON with user input ids](#)

Displaying only results for FDR P < 0.05, [click here to display all results](#)

| GO biological process complete                                      | Homo sapiens (REF) |    | upload_1 (Hierarchy NEW! <a href="#">?</a> ) |                 |     |             |          |
|---------------------------------------------------------------------|--------------------|----|----------------------------------------------|-----------------|-----|-------------|----------|
|                                                                     | #                  | #  | expected                                     | Fold Enrichment | +/- | raw P value | FDR      |
| SRP-dependent cotranslational protein targeting to membrane         | 96                 | 7  | .10                                          | 68.26           | +   | 1.01E-11    | 1.60E-07 |
| ↳protein targeting to ER                                            | 111                | 7  | .12                                          | 59.04           | +   | 2.67E-11    | 1.40E-07 |
| ↳protein targeting                                                  | 370                | 8  | .40                                          | 20.24           | +   | 3.03E-09    | 3.68E-06 |
| ↳intracellular protein transport                                    | 974                | 8  | 1.04                                         | 7.69            | +   | 4.53E-06    | 1.79E-03 |
| ↳macromolecule localization                                         | 2553               | 10 | 2.73                                         | 3.67            | +   | 1.35E-04    | 3.61E-02 |
| ↳protein localization                                               | 2161               | 10 | 2.31                                         | 4.33            | +   | 3.22E-05    | 1.04E-02 |
| ↳intracellular transport                                            | 1500               | 9  | 1.60                                         | 5.62            | +   | 1.22E-05    | 4.37E-03 |
| ↳protein transport                                                  | 1464               | 9  | 1.56                                         | 5.75            | +   | 1.00E-05    | 3.77E-03 |
| ↳establishment of protein localization                              | 1559               | 9  | 1.67                                         | 5.40            | +   | 1.66E-05    | 5.71E-03 |
| ↳peptide transport                                                  | 1493               | 9  | 1.59                                         | 5.64            | +   | 1.17E-05    | 4.31E-03 |
| ↳amide transport                                                    | 1527               | 9  | 1.63                                         | 5.52            | +   | 1.41E-05    | 4.94E-03 |
| ↳nitrogen compound transport                                        | 1802               | 9  | 1.92                                         | 4.68            | +   | 5.27E-05    | 1.57E-02 |
| ↳establishment of protein localization to endoplasmic reticulum     | 115                | 7  | .12                                          | 56.98           | +   | 3.38E-11    | 1.33E-07 |
| ↳protein localization to endoplasmic reticulum                      | 142                | 7  | .15                                          | 46.15           | +   | 1.39E-10    | 3.14E-07 |
| ↳protein localization to organelle                                  | 791                | 8  | .84                                          | 9.47            | +   | 9.69E-07    | 4.37E-04 |
| ↳establishment of protein localization to organelle                 | 449                | 8  | .48                                          | 16.68           | +   | 1.33E-08    | 1.11E-05 |
| ↳cotranslational protein targeting to membrane                      | 101                | 7  | .11                                          | 64.88           | +   | 1.42E-11    | 1.12E-07 |
| ↳protein targeting to membrane                                      | 183                | 7  | .20                                          | 35.81           | +   | 7.67E-10    | 1.21E-06 |
| ↳establishment of protein localization to membrane                  | 307                | 7  | .33                                          | 21.35           | +   | 2.49E-08    | 1.87E-05 |
| ↳protein localization to membrane                                   | 537                | 7  | .57                                          | 12.20           | +   | 1.04E-06    | 4.54E-04 |
| cytoplasmic translation                                             | 75                 | 5  | .08                                          | 62.41           | +   | 1.94E-08    | 1.53E-05 |
| ↳translation                                                        | 384                | 8  | .41                                          | 19.50           | +   | 4.03E-09    | 4.54E-06 |
| ↳peptide biosynthetic process                                       | 409                | 8  | .44                                          | 18.31           | +   | 6.54E-09    | 6.44E-06 |
| ↳peptide metabolic process                                          | 537                | 8  | .57                                          | 13.95           | +   | 5.23E-08    | 3.43E-05 |
| ↳cellular amide metabolic process                                   | 808                | 8  | .86                                          | 9.27            | +   | 1.14E-06    | 4.84E-04 |
| ↳cellular nitrogen compound metabolic process                       | 3407               | 12 | 3.64                                         | 3.30            | +   | 5.30E-05    | 1.55E-02 |
| ↳amide biosynthetic process                                         | 528                | 8  | .56                                          | 14.18           | +   | 4.60E-08    | 3.15E-05 |
| ↳cellular nitrogen compound biosynthetic process                    | 1575               | 10 | 1.68                                         | 5.94            | +   | 1.92E-06    | 7.97E-04 |
| ↳organonitrogen compound biosynthetic process                       | 1380               | 10 | 1.47                                         | 6.78            | +   | 5.74E-07    | 2.74E-04 |
| ↳gene expression                                                    | 2187               | 10 | 2.34                                         | 4.28            | +   | 3.57E-05    | 1.10E-02 |
| viral transcription                                                 | 116                | 7  | .12                                          | 56.49           | +   | 3.58E-11    | 1.13E-07 |
| ↳viral process                                                      | 849                | 7  | .91                                          | 7.72            | +   | 2.05E-05    | 6.73E-03 |
| ↳biological process involved in symbiotic interaction               | 937                | 7  | 1.00                                         | 6.99            | +   | 3.84E-05    | 1.17E-02 |
| ↳viral gene expression                                              | 172                | 7  | .18                                          | 38.10           | +   | 5.05E-10    | 8.85E-07 |
| nuclear-transcribed mRNA catabolic process, nonsense-mediated decay | 120                | 7  | .13                                          | 54.61           | +   | 4.50E-11    | 1.18E-07 |
| ↳nuclear-transcribed mRNA catabolic process                         | 196                | 7  | .21                                          | 33.43           | +   | 1.22E-09    | 1.75E-06 |
| ↳mRNA catabolic process                                             | 216                | 7  | .23                                          | 30.34           | +   | 2.34E-09    | 3.08E-06 |
| ↳RNA catabolic process                                              | 246                | 7  | .26                                          | 26.64           | +   | 5.62E-09    | 5.91E-06 |
| ↳RNA metabolic process                                              | 1599               | 9  | 1.71                                         | 5.27            | +   | 2.04E-05    | 6.84E-03 |
| ↳cellular macromolecule catabolic process                           | 912                | 7  | .97                                          | 7.19            | +   | 3.23E-05    | 1.02E-02 |
| ↳macromolecule catabolic process                                    | 1046               | 7  | 1.12                                         | 6.26            | +   | 7.70E-05    | 2.17E-02 |
| ↳nucleobase-containing compound catabolic process                   | 375                | 7  | .40                                          | 17.47           | +   | 9.52E-08    | 6.01E-05 |
| ↳cellular nitrogen compound catabolic process                       | 425                | 7  | .45                                          | 15.42           | +   | 2.20E-07    | 1.28E-04 |
| ↳heterocycle catabolic process                                      | 419                | 7  | .45                                          | 15.64           | +   | 2.00E-07    | 1.21E-04 |
| ↳aromatic compound catabolic process                                | 441                | 7  | .47                                          | 14.86           | +   | 2.81E-07    | 1.53E-04 |
| ↳organic cyclic compound catabolic process                          | 469                | 7  | .50                                          | 13.97           | +   | 4.23E-07    | 2.08E-04 |
| ↳mRNA metabolic process                                             | 694                | 8  | .74                                          | 10.79           | +   | 3.64E-07    | 1.91E-04 |
| translational initiation                                            | 143                | 7  | .15                                          | 45.82           | +   | 1.46E-10    | 2.88E-07 |
| mitochondrial ATP synthesis coupled electron transport              | 89                 | 3  | .10                                          | 31.56           | +   | 1.25E-04    | 3.45E-02 |
| ↳ATP synthesis coupled electron transport                           | 90                 | 3  | .10                                          | 31.20           | +   | 1.29E-04    | 3.50E-02 |
| ↳oxidative phosphorylation                                          | 120                | 4  | .13                                          | 31.20           | +   | 8.38E-06    | 3.23E-03 |
| ↳ATP metabolic process                                              | 206                | 4  | .22                                          | 18.18           | +   | 6.63E-05    | 1.90E-02 |
| rRNA processing                                                     | 260                | 7  | .28                                          | 25.20           | +   | 8.16E-09    | 7.57E-06 |
| ↳ncRNA processing                                                   | 432                | 7  | .46                                          | 15.17           | +   | 2.45E-07    | 1.38E-04 |
| ↳RNA processing                                                     | 923                | 8  | .99                                          | 8.11            | +   | 3.05E-06    | 1.23E-03 |
| ↳ncRNA metabolic process                                            | 517                | 7  | .55                                          | 12.67           | +   | 8.06E-07    | 3.74E-04 |
| ↳rRNA metabolic process                                             | 270                | 7  | .29                                          | 24.27           | +   | 1.05E-08    | 9.21E-06 |
| ↳ribosome biogenesis                                                | 332                | 7  | .35                                          | 19.74           | +   | 4.21E-08    | 3.02E-05 |
| ↳ribonucleoprotein complex biogenesis                               | 465                | 7  | .50                                          | 14.09           | +   | 3.99E-07    | 2.03E-04 |



Analysis Summary: Please report in publication [?](#)

|                                                                                                                  |                                                                                                                                                               |
|------------------------------------------------------------------------------------------------------------------|---------------------------------------------------------------------------------------------------------------------------------------------------------------|
| <b>Analysis Type:</b> PANTHER Overrepresentation Test (Released 20210224)                                        |                                                                                                                                                               |
| <b>Annotation Version and Release Date:</b> GO Ontology database DOI: 10.5281/zenodo.4437524 Released 2021-01-01 |                                                                                                                                                               |
| <b>Analyzed List:</b>                                                                                            | upload_1 (Homo sapiens) <a href="#">Change</a>                                                                                                                |
| <b>Reference List:</b>                                                                                           | Homo sapiens (all genes in database) <a href="#">Change</a>                                                                                                   |
| <b>Annotation Data Set:</b>                                                                                      | GO biological process complete <a href="#">?</a>                                                                                                              |
| <b>Test Type:</b>                                                                                                | Fisher's Exact <input type="radio"/> Binomial                                                                                                                 |
| <b>Correction:</b>                                                                                               | Calculate False Discovery Rate <input type="radio"/> Use the Bonferroni correction for multiple testing <a href="#">?</a> <input type="radio"/> No correction |

Results [?](#)

|                               | Reference list     | upload_1       |
|-------------------------------|--------------------|----------------|
| Uniquely Mapped IDs:          | 20595 out of 20595 | 121 out of 129 |
| Unmapped IDs:                 | 0                  | 1              |
| Multiple mapping information: | 0                  | 3              |

**Neely 2021, suppl. Table 7F: Cluster 4 at E+L 0.1 μM**

Export [Table](#) [XML with user input ids](#) [JSON with user input ids](#)

Displaying only results for FDR P < 0.05, [click here to display all results](#)

|                                                                            | Homo sapiens (REF) |     | upload_1 (▼ Hierarchy NEW! <a href="#">?</a> ) |                 |     |             |          |
|----------------------------------------------------------------------------|--------------------|-----|------------------------------------------------|-----------------|-----|-------------|----------|
| GO biological process complete                                             | #                  | #   | expected                                       | Fold Enrichment | +/- | raw P value | FDR      |
| putrescine catabolic process                                               | 3                  | 2   | .02                                            | > 100           | +   | 3.80E-04    | 4.22E-02 |
| ↳organonitrogen compound metabolic process                                 | 5254               | 56  | 32.91                                          | 1.70            | +   | 1.06E-05    | 1.48E-03 |
| ↳↳metabolic process                                                        | 8334               | 80  | 52.20                                          | 1.53            | +   | 1.30E-06    | 1.96E-04 |
| ↳↳cellular nitrogen compound metabolic process                             | 3407               | 47  | 21.34                                          | 2.20            | +   | 6.72E-08    | 1.23E-05 |
| ↳↳cellular metabolic process                                               | 7571               | 78  | 47.42                                          | 1.64            | +   | 6.39E-08    | 1.20E-05 |
| ↳↳cellular process                                                         | 15487              | 116 | 97.01                                          | 1.20            | +   | 3.50E-05    | 4.56E-03 |
| ↳↳organic substance catabolic process                                      | 1762               | 36  | 11.04                                          | 3.26            | +   | 1.64E-10    | 4.45E-08 |
| ↳↳catabolic process                                                        | 2085               | 36  | 13.06                                          | 2.76            | +   | 1.41E-08    | 3.19E-06 |
| ribosomal small subunit assembly                                           | 21                 | 6   | .13                                            | 45.61           | +   | 1.38E-08    | 3.15E-06 |
| ↳ribosome assembly                                                         | 64                 | 6   | .40                                            | 14.97           | +   | 4.90E-06    | 7.02E-04 |
| ↳cellular component organization or biogenesis                             | 6000               | 68  | 37.58                                          | 1.81            | +   | 2.71E-08    | 5.63E-06 |
| ↳cellular component assembly                                               | 2438               | 30  | 15.27                                          | 1.96            | +   | 2.99E-04    | 3.41E-02 |
| ↳cellular component biogenesis                                             | 2701               | 44  | 16.92                                          | 2.60            | +   | 1.07E-09    | 2.67E-07 |
| ↳ribosome biogenesis                                                       | 332                | 20  | 2.08                                           | 9.62            | +   | 6.15E-14    | 2.69E-11 |
| ↳ribonucleoprotein complex biogenesis                                      | 465                | 20  | 2.91                                           | 6.87            | +   | 2.21E-11    | 6.98E-09 |
| ↳ribosomal small subunit biogenesis                                        | 75                 | 7   | .47                                            | 14.90           | +   | 7.93E-07    | 1.20E-04 |
| ↳protein-containing complex subunit organization                           | 1582               | 31  | 9.91                                           | 3.13            | +   | 1.12E-08    | 2.60E-06 |
| ↳cellular protein-containing complex assembly                              | 860                | 23  | 5.39                                           | 4.27            | +   | 5.20E-09    | 1.24E-06 |
| ↳protein-containing complex assembly                                       | 1338               | 29  | 8.38                                           | 3.46            | +   | 4.18E-09    | 1.01E-06 |
| protein insertion into mitochondrial inner membrane                        | 11                 | 3   | .07                                            | 43.54           | +   | 8.16E-05    | 1.02E-02 |
| ↳inner mitochondrial membrane organization                                 | 52                 | 7   | .33                                            | 21.49           | +   | 8.01E-08    | 1.44E-05 |
| ↳mitochondrial membrane organization                                       | 140                | 8   | .88                                            | 9.12            | +   | 4.12E-06    | 5.95E-04 |
| ↳mitochondrion organization                                                | 457                | 21  | 2.86                                           | 7.34            | +   | 2.00E-12    | 6.70E-10 |
| ↳cellular protein localization                                             | 1643               | 31  | 10.29                                          | 3.01            | +   | 2.65E-08    | 5.58E-06 |
| ↳cellular macromolecule localization                                       | 1649               | 31  | 10.33                                          | 3.00            | +   | 2.88E-08    | 5.90E-06 |
| ↳cellular localization                                                     | 3006               | 44  | 18.83                                          | 2.34            | +   | 2.91E-08    | 5.88E-06 |
| ↳localization                                                              | 5805               | 62  | 36.36                                          | 1.71            | +   | 1.87E-06    | 2.78E-04 |
| ↳macromolecule localization                                                | 2553               | 34  | 15.99                                          | 2.13            | +   | 2.06E-05    | 2.75E-03 |
| ↳protein localization                                                      | 2161               | 32  | 13.54                                          | 2.36            | +   | 3.77E-06    | 5.56E-04 |
| ↳establishment of protein localization to membrane                         | 307                | 26  | 1.92                                           | 13.52           | +   | 2.39E-21    | 2.90E-18 |
| ↳protein localization to membrane                                          | 537                | 27  | 3.36                                           | 8.03            | +   | 1.06E-16    | 6.44E-14 |
| ↳establishment of protein localization                                     | 1559               | 28  | 9.77                                           | 2.87            | +   | 3.95E-07    | 6.35E-05 |
| ↳establishment of localization                                             | 4653               | 56  | 29.14                                          | 1.92            | +   | 2.18E-07    | 3.61E-05 |
| ↳intracellular protein transport                                           | 974                | 28  | 6.10                                           | 4.59            | +   | 1.61E-11    | 5.17E-09 |
| ↳intracellular transport                                                   | 1500               | 34  | 9.40                                           | 3.62            | +   | 4.10E-11    | 1.24E-08 |
| ↳establishment of localization in cell                                     | 2365               | 41  | 14.81                                          | 2.77            | +   | 8.22E-10    | 2.16E-07 |
| ↳transport                                                                 | 4502               | 55  | 28.20                                          | 1.95            | +   | 1.56E-07    | 2.68E-05 |
| ↳protein transport                                                         | 1464               | 28  | 9.17                                           | 3.05            | +   | 1.11E-07    | 1.93E-05 |
| ↳peptide transport                                                         | 1493               | 28  | 9.35                                           | 2.99            | +   | 1.66E-07    | 2.81E-05 |
| ↳amide transport                                                           | 1527               | 28  | 9.56                                           | 2.93            | +   | 2.61E-07    | 4.28E-05 |
| ↳nitrogen compound transport                                               | 1802               | 30  | 11.29                                          | 2.66            | +   | 6.77E-07    | 1.04E-04 |
| ↳organic substance transport                                               | 2171               | 32  | 13.60                                          | 2.35            | +   | 4.06E-06    | 5.94E-04 |
| ↳anion transport                                                           | 2288               | 32  | 14.33                                          | 2.23            | +   | 1.43E-05    | 1.94E-03 |
| ↳ion transport                                                             | 2882               | 44  | 18.05                                          | 2.44            | +   | 1.07E-08    | 2.51E-06 |
| ↳establishment of protein localization to organelle                        | 449                | 26  | 2.81                                           | 9.24            | +   | 1.66E-17    | 1.25E-14 |
| ↳protein localization to organelle                                         | 791                | 27  | 4.95                                           | 5.45            | +   | 8.56E-13    | 3.14E-10 |
| ↳mitochondrial transport                                                   | 229                | 8   | 1.43                                           | 5.58            | +   | 1.21E-04    | 1.46E-02 |
| ↳protein targeting                                                         | 370                | 27  | 2.32                                           | 11.65           | +   | 1.39E-20    | 1.46E-17 |
| mitochondrial electron transport, cytochrome c to oxygen                   | 20                 | 5   | .13                                            | 39.91           | +   | 4.16E-07    | 6.62E-05 |
| ↳mitochondrial ATP synthesis coupled electron transport                    | 89                 | 13  | .56                                            | 23.32           | +   | 6.65E-14    | 2.84E-11 |
| ↳ATP synthesis coupled electron transport                                  | 90                 | 13  | .56                                            | 23.06           | +   | 7.57E-14    | 3.14E-11 |
| ↳respiratory electron transport chain                                      | 108                | 13  | .68                                            | 19.22           | +   | 6.32E-13    | 2.37E-10 |
| ↳electron transport chain                                                  | 170                | 13  | 1.06                                           | 12.21           | +   | 1.25E-10    | 3.51E-08 |
| ↳generation of precursor metabolites and energy                            | 402                | 18  | 2.52                                           | 7.15            | +   | 1.30E-10    | 3.60E-08 |
| ↳cellular respiration                                                      | 157                | 13  | .98                                            | 13.22           | +   | 4.95E-11    | 1.47E-08 |
| ↳energy derivation by oxidation of organic compounds                       | 227                | 13  | 1.42                                           | 9.14            | +   | 3.49E-09    | 8.61E-07 |
| ↳oxidative phosphorylation                                                 | 120                | 17  | .75                                            | 22.62           | +   | 1.20E-17    | 9.49E-15 |
| ↳phosphorylation                                                           | 1023               | 22  | 6.41                                           | 3.43            | +   | 4.80E-07    | 7.50E-05 |
| ↳phosphate-containing compound metabolic process                           | 1907               | 27  | 11.94                                          | 2.26            | +   | 5.29E-05    | 6.84E-03 |
| ↳phosphorus metabolic process                                              | 1934               | 27  | 12.11                                          | 2.23            | +   | 1.01E-04    | 1.24E-02 |
| ↳ATP metabolic process                                                     | 206                | 18  | 1.29                                           | 13.95           | +   | 3.12E-15    | 1.54E-12 |
| ↳aerobic electron transport chain                                          | 20                 | 5   | .13                                            | 39.91           | +   | 4.16E-07    | 6.55E-05 |
| ↳aerobic respiration                                                       | 77                 | 6   | .48                                            | 12.44           | +   | 1.32E-05    | 1.81E-03 |
| SRP-dependent cotranslational protein targeting to membrane                | 96                 | 23  | .60                                            | 38.25           | +   | 3.13E-28    | 4.94E-24 |
| ↳protein targeting to ER                                                   | 111                | 23  | .70                                            | 33.08           | +   | 5.85E-27    | 3.07E-23 |
| ↳establishment of protein localization to endoplasmic reticulum            | 115                | 23  | .72                                            | 31.93           | +   | 1.20E-26    | 4.73E-23 |
| ↳protein localization to endoplasmic reticulum                             | 142                | 23  | .89                                            | 25.86           | +   | 8.93E-25    | 2.01E-21 |
| ↳cotranslational protein targeting to membrane                             | 101                | 23  | .63                                            | 36.36           | +   | 8.68E-28    | 6.85E-24 |
| ↳protein targeting to membrane                                             | 183                | 23  | 1.15                                           | 20.07           | +   | 1.68E-22    | 2.40E-19 |
| mitochondrial ATP synthesis coupled proton transport                       | 19                 | 4   | .12                                            | 33.61           | +   | 1.16E-05    | 1.60E-03 |
| ↳ATP synthesis coupled proton transport                                    | 24                 | 4   | .15                                            | 26.61           | +   | 2.61E-05    | 3.46E-03 |
| ↳ATP biosynthetic process                                                  | 36                 | 4   | .23                                            | 17.74           | +   | 1.10E-04    | 1.35E-02 |
| ↳purine ribonucleotide biosynthetic process                                | 150                | 6   | .94                                            | 6.39            | +   | 4.39E-04    | 4.81E-02 |
| ↳purine nucleotide biosynthetic process                                    | 161                | 7   | 1.01                                           | 6.94            | +   | 8.85E-05    | 1.10E-02 |
| ↳purine-containing compound biosynthetic process                           | 172                | 7   | 1.08                                           | 6.50            | +   | 1.31E-04    | 1.58E-02 |
| ↳organic cyclic compound metabolic process                                 | 3190               | 45  | 19.98                                          | 2.25            | +   | 6.18E-08    | 1.17E-05 |
| ↳organic substance biosynthetic process                                    | 2804               | 50  | 17.56                                          | 2.85            | +   | 1.44E-12    | 5.05E-10 |
| ↳biosynthetic process                                                      | 2862               | 50  | 17.93                                          | 2.79            | +   | 3.10E-12    | 1.02E-09 |
| ↳heterocycle metabolic process                                             | 2904               | 41  | 18.19                                          | 2.25            | +   | 3.30E-07    | 5.37E-05 |
| ↳cellular biosynthetic process                                             | 2709               | 49  | 16.97                                          | 2.89            | +   | 1.61E-12    | 5.53E-10 |
| ↳cellular nitrogen compound biosynthetic process                           | 1575               | 41  | 9.87                                           | 4.16            | +   | 2.08E-15    | 1.06E-12 |
| ↳cellular aromatic compound metabolic process                              | 2949               | 42  | 18.47                                          | 2.27            | +   | 1.84E-07    | 3.09E-05 |
| ↳organonitrogen compound biosynthetic process                              | 1380               | 39  | 8.64                                           | 4.51            | +   | 9.08E-16    | 4.94E-13 |
| ↳nucleobase-containing compound metabolic process                          | 2720               | 41  | 17.04                                          | 2.41            | +   | 5.52E-08    | 1.09E-05 |
| ↳purine nucleotide metabolic process                                       | 337                | 9   | 2.11                                           | 4.26            | +   | 3.21E-04    | 3.62E-02 |
| ↳purine ribonucleotide metabolic process                                   | 314                | 9   | 1.97                                           | 4.58            | +   | 1.94E-04    | 2.28E-02 |
| ↳ribonucleotide metabolic process                                          | 332                | 9   | 2.08                                           | 4.33            | +   | 2.89E-04    | 3.33E-02 |
| ↳ribose phosphate metabolic process                                        | 342                | 9   | 2.14                                           | 4.20            | +   | 3.57E-04    | 3.99E-02 |
| ↳purine ribonucleoside triphosphate biosynthetic process                   | 47                 | 4   | .29                                            | 13.59           | +   | 2.85E-04    | 3.34E-02 |
| ↳purine nucleoside triphosphate biosynthetic process                       | 48                 | 4   | .30                                            | 13.30           | +   | 3.08E-04    | 3.49E-02 |
| ↳ribonucleoside triphosphate biosynthetic process                          | 53                 | 4   | .33                                            | 12.05           | +   | 4.38E-04    | 4.84E-02 |
| ↳energy coupled proton transport, down electrochemical gradient            | 24                 | 4   | .15                                            | 26.61           | +   | 2.61E-05    | 3.43E-03 |
| ↳proton transmembrane transport                                            | 134                | 10  | .84                                            | 11.91           | +   | 2.33E-08    | 5.03E-06 |
| viral transcription                                                        | 116                | 23  | .73                                            | 31.65           | +   | 1.43E-26    | 4.51E-23 |
| ↳viral process                                                             | 849                | 33  | 5.32                                           | 6.21            | +   | 3.73E-17    | 2.67E-14 |
| ↳biological process involved in symbiotic interaction                      | 937                | 35  | 5.87                                           | 5.96            | +   | 1.10E-17    | 9.15E-15 |
| ↳biological process involved in interspecies interaction between organisms | 2118               | 41  | 13.27                                          | 3.09            | +   | 2.91E-11    | 9.00E-09 |
| ↳viral gene expression                                                     | 172                | 23  | 1.08                                           | 21.35           | +   | 4.65E-23    | 7.33E-20 |
| nuclear-transcribed mRNA catabolic process, nonsense-mediated decay        | 120                | 23  | .75                                            | 30.60           | +   | 2.85E-26    | 7.49E-23 |
| ↳nuclear-transcribed mRNA catabolic process                                | 196                | 24  | 1.23                                           | 19.55           | +   | 3.28E-23    | 5.75E-20 |
| ↳mRNA catabolic process                                                    | 216                | 24  | 1.35                                           | 17.74           | +   | 2.69E-22    | 3.53E-19 |
| ↳negative regulation of gene expression                                    | 2034               | 35  | 12.74                                          | 2.75            | +   | 2.61E-08    | 5.57E-06 |
| ↳negative regulation of macromolecule metabolic process                    | 2862               | 42  | 17.93                                          | 2.34            | +   | 6.58E-08    | 1.22E-05 |
| ↳negative regulation of metabolic process                                  | 3105               | 44  | 19.45                                          | 2.26            | +   | 8.58E-08    | 1.50E-05 |
| ↳negative regulation of biological process                                 | 5544               | 64  | 34.73                                          | 1.84            | +   | 6.92E-08    | 1.26E-05 |
| ↳regulation of metabolic process                                           | 6854               | 65  | 42.93                                          | 1.51            | +   | 7.18E-05    | 9.13E-03 |
| ↳regulation of macromolecule metabolic process                             | 6308               | 61  | 39.51                                          | 1.54            | +   | 7.72E-05    | 9.74E-03 |
| ↳regulation of gene expression                                             | 4880               | 53  | 30.57                                          | 1.73            | +   | 1.56E-05    | 2.11E-03 |
| ↳RNA catabolic process                                                     | 246                | 24  | 1.54                                           | 15.58           | +   | 4.49E-21    | 5.05E-18 |
| ↳RNA metabolic process                                                     | 1599               | 30  | 10.02                                          | 3.00            | +   | 5.33E-08    | 1.06E-05 |
| ↳nucleic acid metabolic process                                            | 2232               | 32  | 13.98                                          | 2.29            | +   | 6.68E-06    | 9.50E-04 |
| ↳cellular macromolecule catabolic process                                  | 912                | 30  | 5.71                                           | 5.25            | +   | 9.19E-14    | 3.72E-11 |
| ↳macromolecule catabolic process                                           | 1046               | 31  | 6.55                                           | 4.73            | +   | 4.78E-13    | 1.84E-10 |
| ↳cellular catabolic process                                                | 1798               | 32  | 11.26                                          | 2.84            | +   | 5.74E-08    | 1.10E-05 |
| ↳nucleobase-containing compound catabolic process                          | 375                | 25  | 2.35                                           | 10.64           | +   | 3.25E-18    | 2.85E-15 |
| ↳cellular nitrogen compound catabolic process                              | 425                | 25  | 2.66                                           | 9.39            | +   | 5.27E-17    | 3.46E-14 |
| ↳heterocycle catabolic process                                             | 419                | 25  | 2.62                                           | 9.53            | +   | 3.84E-17    | 2.64E-14 |
| ↳aromatic compound catabolic process                                       | 441                | 25  | 2.76                                           | 9.05            | +   | 1.19E-16    | 6.98E-14 |
| ↳organic cyclic compound catabolic process                                 | 469                | 25  | 2.94                                           | 8.51            | +   | 4.65E-16    | 2.62E-13 |
| ↳mRNA metabolic process                                                    | 694                | 26  | 4.35                                           | 5.98            | +   | 3.15E-13    | 1.24E-10 |
| cytoplasmic translation                                                    | 75                 | 13  | .47                                            | 27.67           | +   | 9.19E-15    | 4.39E-12 |
| ↳translation                                                               | 384                | 26  | 2.41                                           | 10.81           | +   | 4.44E-19    | 4.38E-16 |
| ↳peptide biosynthetic process                                              | 409                | 26  | 2.56                                           | 10.15           | +   | 1.92E-18    | 1.78E-15 |
| ↳peptide metabolic process                                                 | 537                | 26  | 3.                                             |                 |     |             |          |
